# Supplementary material for: Widespread destabilization of C. elegans microRNAs by the E3 ubiquitin ligase EBAX-1
Source: bioRxiv preprint, doi:10.1101/2024.06.28.601170, version 1 (2024-06-29)
Supplement: Supplemental Table 2 [file 601170_file05.xlsx]

## Sheet: Sheet1
piRNA	N2_A	N2_B	CZ9907_A	CZ9907_B	N2_Ad_1	N2_Ad_2	CZ9912_Ad_1	CZ9912_Ad_2
21ur-1	4	11	6	2	4	9	7	5
21ur-10	388	748	340	474	990	1311	1114	2157
21ur-100	306	483	284	392	451	679	392	920
21ur-1000	119	175	46	270	313	475	670	925
21ur-10000	30	87	20	52	2	3	10	34
21ur-10001	0	21	1	5	1	2	1	2
21ur-10002	3	9	5	13	2	4	1	2
21ur-10003	9	17	8	10	16	36	19	42
21ur-10004	12	17	12	11	35	40	38	78
21ur-10005	1	2	2	4	2	7	6	7
21ur-10007	2	9	2	4	1	6	8	11
21ur-10008	21	40	28	28	2	12	9	38
21ur-10009	11	30	13	20	31	52	24	62
21ur-1001	275	561	151	497	44	111	273	389
21ur-10010	3	10	2	4	10	16	17	24
21ur-10011	4	5	1	5	0	1	6	10
21ur-10012	163	289	178	176	337	529	320	973
21ur-10013	2	8	0	2	1	1	4	5
21ur-10014	27	42	38	21	33	54	32	96
21ur-10015	1	0	0	0	11	14	11	16
21ur-10016	6	21	13	11	111	97	84	246
21ur-10017	15	29	25	10	90	110	70	124
21ur-10018	1	2	0	2	1	0	0	6
21ur-10019	13	24	8	37	9	4	26	40
21ur-1002	283	523	194	528	113	157	371	458
21ur-10020	42	70	32	43	143	200	175	295
21ur-10021	12	39	9	30	13	18	55	97
21ur-10022	194	518	265	222	451	654	368	1011
21ur-10023	26	71	15	55	5	13	35	76
21ur-10024	0	1	0	1	0	0	0	0
21ur-10025	43	55	49	53	64	57	50	82
21ur-10026	4	22	6	8	28	30	40	56
21ur-10027	7	9	3	2	5	6	4	12
21ur-10029	28	93	49	80	44	89	60	135
21ur-1003	85	252	90	188	319	397	382	834
21ur-10030	70	262	123	126	557	650	566	1231
21ur-10031	5	10	11	8	4	9	3	13
21ur-10032	4	20	4	4	8	11	12	17
21ur-10033	1	1	2	0	0	1	0	0
21ur-10034	2	17	1	8	3	5	3	7
21ur-10035	64	145	56	128	65	160	81	178
21ur-10036	88	186	34	83	5	7	19	36
21ur-10037	222	409	144	247	32	120	83	150
21ur-10038	12	35	14	22	58	65	52	109
21ur-10039	13	27	19	14	41	47	54	71
21ur-1004	18	29	9	25	4	12	21	18
21ur-10040	6	3	3	7	4	4	2	4
21ur-10042	8	9	3	5	4	0	10	13
21ur-10043	0	7	0	4	2	3	1	7
21ur-10044	11	23	7	17	15	20	7	24
21ur-10045	1	8	9	5	50	94	27	105
21ur-10046	15	21	5	4	26	40	18	62
21ur-10047	13	12	5	10	44	74	47	81
21ur-10048	13	19	13	28	2	7	17	15
21ur-10049	6	5	2	6	13	17	12	19
21ur-1005	980	1356	713	724	827	1094	800	1896
21ur-10050	1	3	1	1	3	3	6	10
21ur-10051	0	2	3	2	0	1	2	4
21ur-10052	28	41	35	57	54	63	55	146
21ur-10053	36	113	39	104	94	62	82	338
21ur-10054	8	6	0	8	9	17	14	14
21ur-10055	0	0	1	2	4	7	3	10
21ur-10056	6	14	5	19	1	4	6	6
21ur-10057	7	18	8	4	42	38	29	59
21ur-10058	10	31	6	14	8	19	7	25
21ur-10059	8	9	6	15	12	15	16	38
21ur-1006	834	1691	884	681	1462	2528	1202	2414
21ur-10060	2	3	3	0	10	11	8	30
21ur-10061	33	62	34	59	31	49	55	98
21ur-10062	14	17	9	12	13	39	12	35
21ur-10063	95	138	47	81	335	401	332	548
21ur-10064	87	137	27	109	4	5	28	53
21ur-10065	34	86	28	67	1	10	36	38
21ur-10066	61	210	82	63	212	283	185	341
21ur-10067	4	13	7	26	32	53	36	53
21ur-10068	7	6	7	9	36	42	41	78
21ur-10069	45	136	71	74	96	154	100	122
21ur-1007	212	462	138	234	289	461	272	538
21ur-10070	4	5	5	5	3	3	0	3
21ur-10071	18	69	24	74	37	77	173	287
21ur-10072	8	10	8	7	23	36	22	44
21ur-10073	108	317	151	194	255	374	312	605
21ur-10074	5	7	7	2	13	8	7	26
21ur-10075	0	0	1	1	1	2	0	2
21ur-10076	19	120	63	52	50	80	89	153
21ur-10077	4	10	8	12	6	17	18	34
21ur-10078	41	58	14	100	7	7	28	47
21ur-10079	42	95	19	105	14	25	53	81
21ur-1008	348	500	274	188	202	387	192	484
21ur-10080	10	16	3	8	20	11	12	28
21ur-10081	6	24	9	6	18	22	16	20
21ur-10082	13	23	14	18	30	47	41	79
21ur-10083	23	49	14	49	0	5	1	9
21ur-10084	1	5	1	7	0	3	1	5
21ur-10085	13	23	10	18	18	32	23	48
21ur-10086	24	38	12	36	3	14	6	27
21ur-10087	15	40	9	15	8	27	17	33
21ur-10088	32	51	13	52	2	8	17	22
21ur-10089	50	104	49	102	17	32	31	49
21ur-1009	8	21	6	12	90	94	100	135
21ur-10091	6	15	4	16	0	3	4	7
21ur-10092	6	17	8	5	4	9	4	6
21ur-10093	2	11	2	8	2	3	1	0
21ur-10094	5	22	2	14	11	12	19	39
21ur-10095	5	22	6	6	60	79	47	91
21ur-10096	0	1	0	0	0	6	1	0
21ur-10097	69	165	68	80	60	127	64	238
21ur-10098	5	8	3	3	4	6	4	4
21ur-10099	0	1	0	0	7	5	3	6
21ur-101	192	267	106	399	80	111	245	415
21ur-1010	925	1407	793	937	2860	3517	2726	6424
21ur-10100	8	8	5	16	0	1	1	1
21ur-10101	44	129	33	89	5	11	18	24
21ur-10102	5	5	1	3	5	3	2	5
21ur-10103	88	181	51	192	34	41	111	174
21ur-10104	15	11	7	5	5	1	3	11
21ur-10105	25	39	17	22	8	11	28	64
21ur-10106	7	6	3	4	55	68	74	96
21ur-10107	0	1	0	1	1	0	0	0
21ur-10108	4	10	3	8	2	6	6	10
21ur-10109	4	6	1	7	6	11	12	31
21ur-1011	144	197	68	223	59	102	225	388
21ur-10110	5	21	3	17	4	5	14	15
21ur-10111	0	0	0	0	0	0	0	0
21ur-10112	99	218	108	113	354	643	326	619
21ur-10113	3	3	0	4	3	9	19	34
21ur-10114	33	50	24	90	9	5	22	86
21ur-10115	16	24	3	5	1	0	8	10
21ur-10116	14	16	8	21	2	4	6	10
21ur-10117	2	4	0	12	9	0	35	30
21ur-10118	13	25	9	21	25	48	37	61
21ur-10119	1	1	0	0	1	0	0	0
21ur-1012	8	3	2	3	18	50	18	58
21ur-10120	3	5	5	12	0	2	2	45
21ur-10121	10	10	2	8	1	1	6	8
21ur-10122	11	16	5	42	11	10	45	59
21ur-10123	5	6	1	4	0	2	5	6
21ur-10124	42	117	45	44	141	130	98	337
21ur-10125	9	24	5	9	13	10	5	25
21ur-10126	1	1	0	2	3	5	5	7
21ur-10127	11	45	9	58	21	17	24	63
21ur-10128	0	1	0	0	0	0	0	0
21ur-10129	1	2	1	2	1	3	1	3
21ur-1013	462	885	221	767	76	124	242	307
21ur-10130	0	1	0	1	1	4	2	10
21ur-10131	0	1	1	0	6	4	3	5
21ur-10132	5	23	11	22	13	23	18	68
21ur-10134	76	175	58	193	53	38	96	206
21ur-10135	131	301	113	203	90	194	164	312
21ur-10136	8	18	5	7	20	46	13	40
21ur-10137	25	69	27	56	78	100	95	168
21ur-10138	88	164	107	100	167	407	231	419
21ur-10139	13	24	13	10	23	14	18	62
21ur-1014	93	186	55	172	21	32	99	176
21ur-10140	31	104	34	90	10	13	43	90
21ur-10141	262	710	162	604	44	99	182	293
21ur-10142	24	31	24	21	33	47	26	54
21ur-10143	8	20	9	19	21	16	9	27
21ur-10144	10	12	6	12	13	11	9	22
21ur-10145	144	251	118	276	631	1143	794	1685
21ur-10146	21	23	13	30	5	12	20	25
21ur-10147	11	10	5	10	27	32	35	69
21ur-10148	14	21	11	19	31	51	28	94
21ur-10149	59	110	35	90	2	22	45	78
21ur-1015	132	215	64	263	10	43	100	161
21ur-10150	29	64	18	80	36	53	109	179
21ur-10151	5	4	2	2	6	4	3	4
21ur-10152	12	26	10	18	1	2	11	19
21ur-10153	26	52	26	82	48	47	99	181
21ur-10154	36	80	21	80	6	26	88	106
21ur-10155	12	23	10	32	9	8	28	61
21ur-10156	105	202	72	129	720	1379	695	1284
21ur-10157	2	3	0	4	0	0	2	2
21ur-10158	66	101	6	28	4	12	24	85
21ur-10159	51	130	48	154	9	30	36	53
21ur-1016	830	1041	403	800	657	899	847	1677
21ur-10160	126	283	111	305	123	107	123	345
21ur-10161	31	96	37	108	12	30	54	95
21ur-10162	0	1	0	0	0	0	0	2
21ur-10163	33	30	32	45	27	34	26	49
21ur-10164	63	169	76	66	62	137	112	237
21ur-10165	6	10	5	10	2	1	0	3
21ur-10166	7	18	3	16	4	7	6	10
21ur-10167	4	13	5	16	2	8	14	23
21ur-10168	15	42	8	62	11	34	90	130
21ur-10169	23	43	29	18	33	44	30	73
21ur-1017	654	665	273	638	2387	3397	2475	4626
21ur-10170	58	97	40	117	5	15	21	48
21ur-10171	5	6	2	4	6	13	8	15
21ur-10172	5	22	9	6	18	12	9	20
21ur-10173	11	15	4	24	4	5	11	21
21ur-10174	16	29	17	28	13	39	22	41
21ur-10175	12	20	5	16	7	8	18	22
21ur-10176	69	105	32	103	8	13	38	56
21ur-10177	20	76	31	67	23	47	25	77
21ur-10179	15	51	10	48	13	14	26	72
21ur-1018	687	1412	755	848	3240	3182	2659	6658
21ur-10180	244	762	317	433	737	1005	877	2073
21ur-10181	14	34	8	37	9	9	35	53
21ur-10183	88	286	115	165	116	157	144	504
21ur-10184	12	22	9	6	24	29	25	47
21ur-10185	33	34	11	91	10	21	43	86
21ur-10186	815	1312	670	1127	542	754	529	1166
21ur-10187	5	14	1	11	0	1	6	10
21ur-10188	13	24	11	22	50	87	69	129
21ur-10189	91	242	50	164	11	27	63	134
21ur-1019	285	426	105	437	185	301	453	751
21ur-10190	1723	3578	1841	1929	2075	2642	2140	4189
21ur-10191	10	52	19	51	1	3	27	25
21ur-10193	0	0	0	0	1	0	0	0
21ur-10194	2	1	1	6	3	3	9	13
21ur-10195	2	3	3	0	11	14	3	14
21ur-10196	0	0	0	0	0	0	0	0
21ur-10197	0	0	0	0	0	0	0	0
21ur-10198	0	2	2	0	0	0	1	3
21ur-10199	69	175	88	101	271	380	196	523
21ur-102	311	386	179	315	441	529	433	918
21ur-1020	64	222	136	100	296	565	320	582
21ur-10200	21	54	19	47	3	11	16	63
21ur-10201	58	101	35	77	1	16	14	30
21ur-10202	6	3	3	7	30	49	12	17
21ur-10204	11	14	3	19	4	9	17	23
21ur-10205	6	10	5	12	16	39	21	36
21ur-10206	75	147	88	89	177	346	147	288
21ur-10207	11	14	11	9	32	67	26	69
21ur-10208	5	12	2	6	20	52	25	74
21ur-10209	9	9	3	8	5	3	2	5
21ur-1021	1052	1787	880	1037	1541	2487	1754	3053
21ur-10210	3	4	1	1	15	21	16	43
21ur-10211	12	22	5	17	21	36	59	118
21ur-10212	86	269	184	158	110	226	162	608
21ur-10213	14	26	6	16	4	2	5	12
21ur-10214	10	13	9	11	14	20	20	53
21ur-10215	40	96	41	107	146	216	198	453
21ur-10216	76	120	64	71	112	166	98	166
21ur-10217	40	128	32	92	5	27	60	124
21ur-10218	235	491	167	410	21	39	95	147
21ur-10219	91	172	80	194	34	48	57	105
21ur-1022	78	158	72	69	163	287	190	454
21ur-10220	3	14	7	11	13	28	14	30
21ur-10221	14	29	17	6	40	70	22	58
21ur-10222	10	13	6	13	1	5	9	15
21ur-10223	0	7	0	4	2	4	8	9
21ur-10224	4	7	2	2	4	9	2	24
21ur-10225	23	27	22	14	72	100	52	154
21ur-10226	2	1	1	2	0	3	2	1
21ur-10228	1	3	2	1	14	13	25	43
21ur-10229	2	22	2	14	3	8	9	16
21ur-1023	221	463	319	357	325	564	319	984
21ur-10230	29	65	35	57	140	142	101	342
21ur-10231	18	29	12	52	7	12	40	56
21ur-10232	14	22	7	16	19	16	11	30
21ur-10233	1	4	2	1	4	6	5	7
21ur-10234	282	462	166	471	100	148	167	259
21ur-10235	11	39	9	29	14	16	37	56
21ur-10236	2	7	4	6	1	4	5	7
21ur-10237	7	21	9	22	2	10	19	19
21ur-10238	10	21	14	54	17	18	30	71
21ur-10239	1	2	4	0	4	3	0	2
21ur-1024	118	199	93	167	478	419	431	1112
21ur-10240	1	6	2	1	2	6	5	7
21ur-10241	316	802	427	505	428	951	435	1170
21ur-10242	10	14	6	12	2	2	8	16
21ur-10243	107	163	63	160	20	69	63	111
21ur-10244	2	9	3	5	0	2	8	15
21ur-10245	53	94	74	51	28	66	38	75
21ur-10246	8	39	25	28	28	39	25	69
21ur-10247	12	28	15	6	57	69	34	104
21ur-10248	61	87	23	115	17	33	29	98
21ur-10249	126	267	27	66	134	333	220	432
21ur-1025	860	1605	726	893	681	1203	755	1756
21ur-10250	193	338	90	257	23	47	134	207
21ur-10252	8	13	11	6	34	63	36	101
21ur-10254	7	17	11	10	39	36	23	60
21ur-10255	2	8	0	8	2	1	4	9
21ur-10256	1	0	0	0	0	0	0	0
21ur-10257	0	0	0	0	2	5	7	10
21ur-10258	6	11	7	10	8	10	5	16
21ur-10259	65	140	68	96	186	225	163	350
21ur-1026	207	367	106	288	20	33	55	122
21ur-10260	1	2	2	2	0	3	3	4
21ur-10261	9	14	9	12	20	46	36	53
21ur-10262	4	5	0	7	13	16	8	24
21ur-10263	12	11	3	2	12	22	13	29
21ur-10264	16	52	20	20	41	80	30	65
21ur-10265	21	20	11	22	8	20	11	14
21ur-10266	39	92	17	97	8	21	60	72
21ur-10267	6	2	4	4	7	8	4	24
21ur-10268	2	4	5	0	24	33	18	35
21ur-10269	1	2	0	1	0	1	1	4
21ur-1027	271	411	134	409	45	76	255	352
21ur-10270	3	8	1	10	2	9	11	19
21ur-10271	116	129	38	171	19	22	64	109
21ur-10273	1	1	2	2	7	4	2	20
21ur-10274	4	10	4	9	2	21	8	20
21ur-10275	13	37	13	13	16	26	20	34
21ur-10276	78	130	56	57	381	587	281	608
21ur-10277	2	7	0	2	5	11	7	18
21ur-10278	38	92	25	59	2	15	15	33
21ur-10279	11	20	10	39	2	1	3	11
21ur-1028	101	175	36	101	104	199	224	377
21ur-10280	2	12	4	6	0	3	3	8
21ur-10281	1	2	3	0	26	29	21	43
21ur-10282	14	20	18	11	105	113	80	173
21ur-10283	0	4	2	1	6	8	5	12
21ur-10284	4	7	1	10	3	2	8	12
21ur-10285	3	8	3	4	27	37	22	56
21ur-10286	7	14	4	4	30	19	25	45
21ur-10287	100	183	63	214	11	27	42	98
21ur-10289	24	41	15	53	5	12	36	70
21ur-1029	17	49	15	41	4	12	28	52
21ur-10290	4	12	2	9	3	3	13	15
21ur-10291	1	4	2	2	2	3	6	11
21ur-10292	42	77	19	134	41	81	150	184
21ur-10293	33	74	42	39	115	166	97	234
21ur-10294	9	17	3	13	7	19	9	56
21ur-10295	5	12	4	8	28	31	26	71
21ur-10296	0	1	0	2	0	1	0	2
21ur-10297	2	1	1	3	3	4	3	10
21ur-10298	8	7	4	16	3	5	8	17
21ur-10299	25	24	9	23	81	133	89	114
21ur-103	441	725	76	182	872	1381	1300	2080
21ur-1030	1286	2604	1253	907	388	461	327	968
21ur-10300	24	45	6	30	1	2	17	10
21ur-10301	10	19	8	3	12	11	9	15
21ur-10302	186	385	111	298	21	30	74	108
21ur-10303	3	6	2	2	4	1	1	5
21ur-10304	11	27	10	12	21	39	22	42
21ur-10305	11	19	5	8	6	7	9	18
21ur-10306	1	0	4	2	1	0	2	2
21ur-10307	105	134	44	168	47	48	110	216
21ur-10308	10	16	4	17	56	68	55	123
21ur-10309	2	1	5	5	21	5	7	22
21ur-1031	14	34	4	31	7	12	41	62
21ur-10310	13	44	12	25	13	26	19	28
21ur-10311	37	83	26	52	3	9	12	29
21ur-10312	333	803	455	480	511	636	486	1756
21ur-10313	45	73	30	39	13	21	42	66
21ur-10316	2	1	0	2	2	4	9	11
21ur-10317	103	236	82	221	22	55	100	174
21ur-10318	70	138	96	66	221	344	126	244
21ur-10319	11	6	8	10	14	32	19	49
21ur-1032	70	91	23	78	25	41	61	94
21ur-10320	6	20	11	20	4	2	11	15
21ur-10321	22	42	15	14	17	28	12	34
21ur-10322	21	18	7	21	7	4	7	24
21ur-10324	0	2	4	1	60	63	45	111
21ur-10325	1	9	0	10	3	0	4	7
21ur-10326	446	1005	497	412	625	1114	610	1195
21ur-10327	1	1	0	0	0	0	0	0
21ur-10328	16	28	14	8	19	46	22	45
21ur-10329	2	2	0	4	1	0	1	3
21ur-1033	5	5	4	18	7	14	9	36
21ur-10331	2	4	1	4	0	0	4	5
21ur-10332	47	32	7	81	17	30	70	102
21ur-10333	12	12	5	6	48	107	52	122
21ur-10334	1	2	0	0	3	19	1	7
21ur-10335	52	116	40	77	28	35	51	99
21ur-10336	61	184	58	98	1	2	2	4
21ur-10337	0	0	0	0	0	0	0	0
21ur-10338	19	23	12	29	1	5	13	15
21ur-10339	5	5	5	4	3	7	2	9
21ur-1034	122	193	75	262	70	99	284	436
21ur-10340	0	3	2	2	3	7	2	8
21ur-10341	0	0	0	0	0	0	0	1
21ur-10342	2	5	1	3	1	2	4	3
21ur-10343	47	56	25	79	23	18	85	120
21ur-10344	63	110	27	102	5	7	12	20
21ur-10345	41	107	27	48	21	43	20	50
21ur-10346	38	81	9	20	22	59	60	87
21ur-10347	2	13	1	2	3	2	9	24
21ur-10348	9	14	10	21	1	7	5	18
21ur-10349	1	10	2	9	4	12	6	9
21ur-1035	207	428	159	357	56	142	106	211
21ur-10350	2	5	1	8	2	1	7	9
21ur-10351	52	92	20	39	48	75	81	156
21ur-10352	23	35	21	37	26	30	20	91
21ur-10353	5	3	3	4	7	15	4	12
21ur-10354	3	1	0	2	0	3	1	4
21ur-10355	38	88	27	67	17	36	66	62
21ur-10356	40	94	39	31	39	59	23	77
21ur-10357	58	70	34	78	68	66	83	186
21ur-10358	135	294	110	248	14	20	13	61
21ur-10359	15	24	3	19	4	11	4	11
21ur-1036	148	175	86	183	330	330	314	920
21ur-10360	3	8	2	4	2	4	16	15
21ur-10361	10	25	12	19	17	25	13	24
21ur-10362	15	34	6	13	12	16	25	57
21ur-10363	1	2	1	2	6	8	3	9
21ur-10364	2	4	3	3	5	12	7	13
21ur-10365	29	84	24	70	43	43	76	123
21ur-10366	50	144	34	128	12	36	71	182
21ur-10367	0	4	1	4	0	0	0	6
21ur-10368	4	23	3	14	17	36	32	79
21ur-10369	13	32	4	9	1	2	4	9
21ur-1037	2	4	1	5	7	7	4	17
21ur-10370	1	0	0	1	9	3	5	9
21ur-10371	28	52	19	34	1	5	18	23
21ur-10372	10	27	11	15	34	77	39	91
21ur-10373	2	13	5	10	9	16	10	11
21ur-10374	4	13	8	5	12	9	3	27
21ur-10375	95	237	91	198	49	97	102	201
21ur-10376	7	18	7	13	2	16	15	31
21ur-10377	14	17	9	12	8	26	11	34
21ur-10378	24	63	4	7	20	45	22	64
21ur-10379	9	13	1	8	6	12	6	15
21ur-1038	16	60	20	41	24	51	33	84
21ur-10380	27	66	16	68	22	29	83	97
21ur-10381	1	2	1	1	1	5	9	12
21ur-10382	32	42	8	44	10	16	53	114
21ur-10383	141	280	101	310	34	72	91	228
21ur-10384	44	265	111	116	130	153	125	434
21ur-10385	11	25	4	22	7	11	20	37
21ur-10386	35	83	40	102	4	14	19	64
21ur-10387	2	4	5	6	1	4	1	11
21ur-10388	1	2	3	1	12	10	10	16
21ur-10389	56	52	13	73	1	12	35	63
21ur-1039	336	817	385	619	2219	2938	2900	4769
21ur-10390	8	31	11	34	4	7	12	13
21ur-10391	3	10	2	6	2	0	5	7
21ur-10392	1	3	0	1	1	2	0	1
21ur-10393	1	4	2	4	6	9	9	11
21ur-10394	3	12	3	3	19	37	20	41
21ur-10395	1	1	1	3	0	1	0	0
21ur-10396	38	69	24	125	14	27	50	154
21ur-10397	15	27	8	28	9	19	41	74
21ur-10398	552	800	435	835	958	1576	1300	2168
21ur-10399	0	0	0	0	0	1	0	0
21ur-104	256	549	234	429	1148	1504	894	1913
21ur-1040	0	5	2	1	1	1	2	1
21ur-10400	77	131	69	116	428	505	304	891
21ur-10401	0	7	3	3	44	51	44	69
21ur-10402	14	26	6	22	1	9	23	9
21ur-10403	3	6	3	4	13	14	13	26
21ur-10404	79	207	115	86	117	139	105	161
21ur-10406	0	2	0	1	2	7	3	6
21ur-10407	7	15	3	10	1	3	2	16
21ur-10408	155	303	106	346	39	106	209	317
21ur-10409	11	32	13	53	3	8	25	55
21ur-1041	196	405	112	319	30	78	199	281
21ur-10410	3	16	3	9	31	58	28	68
21ur-10411	5	8	4	6	22	16	9	27
21ur-10412	56	158	44	83	10	23	14	30
21ur-10413	0	2	0	0	5	0	0	2
21ur-10414	19	22	15	17	97	109	109	145
21ur-10415	74	221	63	210	18	68	117	154
21ur-10416	38	71	25	73	29	49	44	85
21ur-10417	19	19	8	21	13	6	25	31
21ur-10418	36	85	24	87	39	67	59	143
21ur-10419	5	6	2	6	0	1	7	5
21ur-1042	127	228	82	278	51	90	204	322
21ur-10420	6	20	15	11	20	39	15	41
21ur-10421	0	2	0	0	2	1	14	11
21ur-10422	13	23	6	23	3	9	18	24
21ur-10423	4	11	4	4	12	32	24	71
21ur-10424	8	20	10	26	7	12	35	46
21ur-10425	2	1	3	5	13	16	7	32
21ur-10426	23	50	19	54	2	1	5	20
21ur-10427	17	35	14	16	39	35	14	53
21ur-10428	34	80	26	42	38	43	51	109
21ur-10429	41	152	67	39	36	78	25	107
21ur-1043	216	517	116	455	69	99	260	456
21ur-10430	62	127	47	129	13	19	25	78
21ur-10431	45	84	31	40	48	104	60	155
21ur-10432	44	71	31	25	45	89	40	98
21ur-10433	93	286	78	178	9	26	54	109
21ur-10434	2	17	5	7	223	343	233	464
21ur-10435	110	232	91	282	34	72	178	296
21ur-10436	34	103	41	28	11	37	11	42
21ur-10437	33	62	22	37	2	6	13	35
21ur-10438	4	18	8	18	10	14	59	96
21ur-10439	76	122	24	34	168	237	182	469
21ur-1044	26	111	35	74	71	122	135	226
21ur-10440	15	33	24	26	34	66	47	95
21ur-10441	247	602	159	566	17	41	130	230
21ur-10442	96	236	132	80	202	351	169	347
21ur-10443	7	26	10	12	8	24	11	25
21ur-10444	39	52	17	87	15	9	36	98
21ur-10445	0	2	1	5	16	6	10	37
21ur-10446	20	40	16	46	56	86	78	102
21ur-10447	0	1	0	0	0	1	0	0
21ur-10449	64	117	61	75	197	227	216	373
21ur-1045	0	0	0	0	1	0	1	0
21ur-10450	1	3	4	0	1	7	4	4
21ur-10451	13	25	4	8	1	4	5	17
21ur-10452	0	1	1	0	0	0	0	0
21ur-10453	3	5	3	0	8	16	10	6
21ur-10454	2	7	1	2	3	1	4	1
21ur-10455	60	81	26	85	1	11	22	46
21ur-10456	9	10	4	4	0	3	3	4
21ur-10457	12	24	15	15	15	19	20	37
21ur-10458	9	34	3	36	4	17	21	54
21ur-10459	1	4	2	2	0	1	1	1
21ur-1046	400	513	202	491	308	367	397	851
21ur-10460	9	6	1	9	0	7	4	6
21ur-10461	1	3	2	0	2	4	2	1
21ur-10462	27	68	35	52	74	163	79	155
21ur-10463	168	392	119	318	31	62	97	148
21ur-10464	18	33	7	31	5	8	11	25
21ur-10465	5	5	4	5	13	27	19	43
21ur-10466	16	26	8	38	15	25	39	61
21ur-10467	15	23	10	22	40	37	43	44
21ur-10468	23	25	16	7	32	64	35	84
21ur-10469	5	4	2	8	0	0	0	5
21ur-1047	281	576	230	281	181	304	206	482
21ur-10470	6	7	0	4	2	1	5	6
21ur-10471	2	6	2	3	12	11	10	14
21ur-10472	156	323	144	201	177	277	150	324
21ur-10473	45	118	53	53	69	118	122	160
21ur-10474	0	1	0	1	0	1	2	1
21ur-10475	1338	2182	1158	1514	3098	4839	3606	6270
21ur-10476	41	91	40	63	21	58	28	72
21ur-10477	8	20	10	34	3	13	17	69
21ur-10478	109	197	64	187	15	39	45	102
21ur-10479	29	80	29	61	1	3	13	15
21ur-1048	21	50	10	43	5	8	28	50
21ur-10480	187	295	111	406	37	60	133	186
21ur-10481	1	2	0	4	2	4	6	4
21ur-10482	87	133	40	143	28	21	35	112
21ur-10483	270	546	195	437	165	275	334	508
21ur-10484	51	73	23	72	5	7	17	40
21ur-10485	4	3	2	0	9	5	3	15
21ur-10486	0	3	1	4	9	31	15	40
21ur-10487	242	570	235	296	294	518	348	727
21ur-10488	189	657	171	623	39	66	141	344
21ur-10489	6	18	4	20	6	7	1	17
21ur-1049	139	326	203	137	239	416	232	561
21ur-10490	158	249	121	224	44	65	55	119
21ur-10491	0	4	3	1	0	3	0	5
21ur-10492	25	34	10	26	21	45	43	79
21ur-10493	0	0	0	0	2	3	2	6
21ur-10494	9	19	4	12	5	11	15	12
21ur-10495	2	4	4	3	6	10	7	13
21ur-10496	20	45	22	14	14	24	14	40
21ur-10497	4	7	3	5	6	5	8	7
21ur-10498	1	5	1	4	3	7	2	7
21ur-10499	2	0	0	0	3	8	2	3
21ur-105	565	924	384	790	1252	1714	1626	2845
21ur-1050	466	1228	653	528	1181	2010	1058	2596
21ur-10500	52	93	38	109	20	33	63	117
21ur-10502	224	562	231	183	113	156	97	284
21ur-10503	50	53	42	50	45	65	47	99
21ur-10504	53	146	55	89	158	252	185	346
21ur-10505	8	25	6	10	4	4	5	11
21ur-10506	1	14	3	5	5	5	4	23
21ur-10507	43	68	34	26	136	187	68	160
21ur-10508	18	62	17	35	35	17	30	60
21ur-10509	8	25	4	24	1	9	24	28
21ur-1051	367	774	209	508	6	33	62	72
21ur-10510	10	45	27	36	34	68	37	98
21ur-10511	34	85	42	29	34	74	27	54
21ur-10512	12	26	5	4	11	15	5	19
21ur-10513	15	21	10	9	18	19	13	41
21ur-10514	2	8	3	10	10	21	21	22
21ur-10515	15	19	3	21	2	3	9	9
21ur-10516	50	116	39	145	22	46	73	126
21ur-10517	4	10	1	11	0	2	2	7
21ur-10518	129	210	76	155	41	111	119	172
21ur-10519	11	32	8	33	3	5	11	18
21ur-1052	48	112	4	25	17	28	70	104
21ur-10520	3	12	2	4	0	0	2	2
21ur-10521	0	0	1	2	5	10	5	19
21ur-10522	18	45	8	46	5	14	28	60
21ur-10523	8	25	13	11	31	49	24	60
21ur-10524	35	95	36	72	18	61	34	69
21ur-10525	6	7	2	9	2	8	3	18
21ur-10526	0	4	1	2	0	2	1	6
21ur-10527	47	77	15	77	7	18	40	57
21ur-10528	50	111	37	100	37	71	102	145
21ur-10529	30	86	33	27	83	88	54	124
21ur-1053	115	186	53	184	20	31	66	115
21ur-10530	0	0	0	0	0	0	0	0
21ur-10531	14	42	12	24	6	4	13	19
21ur-10532	31	32	15	16	62	93	97	179
21ur-10533	3	4	0	4	0	1	5	4
21ur-10534	10	17	8	8	25	48	22	43
21ur-10535	1	3	2	2	6	16	7	26
21ur-10537	14	15	12	16	28	42	24	59
21ur-10538	27	28	18	43	19	19	20	56
21ur-10539	1	7	0	1	1	2	5	5
21ur-1054	191	358	113	375	18	44	72	132
21ur-10540	0	0	0	0	2	1	1	0
21ur-10541	57	110	45	57	115	153	91	142
21ur-10542	36	93	33	74	8	11	55	84
21ur-10543	2	7	4	1	14	19	9	8
21ur-10544	19	66	19	21	7	10	7	21
21ur-10545	1	2	0	3	9	17	4	15
21ur-10546	26	80	13	9	99	176	113	231
21ur-10547	64	144	73	113	182	271	281	553
21ur-10548	24	33	24	25	62	91	54	109
21ur-10549	3	10	5	8	7	19	11	43
21ur-1055	376	768	350	578	1216	2100	966	2227
21ur-10550	30	53	19	40	3	3	16	17
21ur-10551	46	67	25	30	104	201	114	255
21ur-10552	76	157	47	112	17	46	70	107
21ur-10553	15	28	3	30	18	37	58	88
21ur-10554	4	38	19	38	235	510	316	688
21ur-10555	105	237	67	184	23	32	79	103
21ur-10556	40	172	35	110	22	45	74	175
21ur-10557	3	14	3	2	4	5	0	9
21ur-10558	78	175	69	119	70	92	82	185
21ur-10559	86	234	21	62	5	8	27	53
21ur-1056	205	366	195	310	597	788	619	1323
21ur-10560	3	6	2	4	7	12	17	10
21ur-10561	0	3	1	2	0	1	1	2
21ur-10562	2	9	2	4	1	4	6	9
21ur-10563	21	39	8	43	8	4	21	28
21ur-10564	20	84	18	39	1	1	14	34
21ur-10565	1	3	1	4	1	1	1	1
21ur-10566	7	17	10	8	25	34	30	61
21ur-10567	42	104	43	123	18	21	41	120
21ur-10568	4	17	6	6	21	13	11	30
21ur-10569	0	3	0	0	0	0	0	0
21ur-1057	411	748	201	533	139	193	546	719
21ur-10570	2	4	2	1	0	0	0	3
21ur-10571	4	4	6	5	24	27	16	83
21ur-10572	14	62	8	41	11	14	20	28
21ur-10573	2	8	1	2	19	10	9	42
21ur-10574	2	29	3	7	2	10	5	6
21ur-10575	3	6	2	5	1	0	3	1
21ur-10576	5	25	0	4	0	1	2	6
21ur-10577	23	41	18	39	2	8	29	42
21ur-10579	53	131	75	84	43	77	58	119
21ur-1058	20	62	38	53	66	91	71	275
21ur-10580	22	53	15	63	5	17	16	55
21ur-10581	6	9	6	5	18	28	19	32
21ur-10582	4	14	3	5	9	17	7	21
21ur-10583	78	106	31	180	15	13	53	89
21ur-10584	270	595	246	322	258	594	261	599
21ur-10585	7	9	8	10	10	39	14	23
21ur-10587	19	61	25	29	35	82	42	57
21ur-10588	236	343	96	315	40	46	90	179
21ur-10589	27	33	20	17	81	91	61	144
21ur-1059	919	1711	562	1358	896	1325	1558	2377
21ur-10590	5	11	2	10	7	18	8	20
21ur-10591	4	9	7	4	16	8	16	19
21ur-10592	1	2	2	5	24	26	17	60
21ur-10593	0	0	1	0	1	0	0	1
21ur-10594	0	7	5	8	5	6	10	15
21ur-10595	41	114	48	46	175	259	188	367
21ur-10596	5	6	3	7	9	19	5	34
21ur-10597	2	7	3	2	2	5	7	14
21ur-10598	12	30	5	26	3	5	7	11
21ur-10599	25	50	14	36	74	106	100	188
21ur-106	7	18	7	15	1	2	6	11
21ur-1060	134	306	96	287	55	143	346	458
21ur-10600	33	68	24	97	27	59	109	222
21ur-10601	4	2	1	1	2	2	1	4
21ur-10602	10	30	13	12	26	45	22	37
21ur-10604	12	32	21	15	35	52	29	69
21ur-10605	0	1	1	8	3	5	7	4
21ur-10606	6	11	5	9	7	7	13	36
21ur-10607	26	81	22	62	1	17	37	61
21ur-10608	9	8	4	5	4	2	5	9
21ur-10609	1	2	0	0	0	1	0	1
21ur-1061	476	651	542	331	1217	2506	943	2484
21ur-10610	29	79	19	82	10	12	47	63
21ur-10611	28	47	6	8	4	4	6	23
21ur-10612	14	19	8	16	2	2	13	38
21ur-10613	7	28	4	2	11	13	19	32
21ur-10614	5	21	10	22	2	3	2	16
21ur-10615	168	368	150	303	87	178	106	209
21ur-10616	80	180	58	144	28	33	56	84
21ur-10617	6	9	3	8	13	30	15	46
21ur-10618	13	26	11	26	9	29	13	34
21ur-10619	0	0	1	1	7	4	8	9
21ur-1062	33	116	73	75	1260	2007	1247	3028
21ur-10620	12	13	10	12	14	29	8	21
21ur-10621	0	0	0	0	1	0	0	3
21ur-10622	11	35	11	36	2	2	8	12
21ur-10623	16	29	8	28	4	5	13	25
21ur-10624	43	130	44	107	19	26	41	83
21ur-10625	2	2	2	8	4	0	4	3
21ur-10626	10	24	6	20	19	18	27	46
21ur-10627	45	103	38	89	16	34	93	116
21ur-10628	2	2	0	0	0	4	0	1
21ur-10629	0	3	0	0	2	1	1	5
21ur-1063	410	788	284	665	353	574	570	944
21ur-10630	66	183	71	142	11	26	55	86
21ur-10631	0	1	1	3	0	2	1	0
21ur-10632	32	99	18	79	5	11	20	24
21ur-10633	76	222	106	101	468	1076	537	1116
21ur-10634	138	356	101	515	68	120	378	532
21ur-10635	6	11	9	5	14	31	12	35
21ur-10636	37	58	23	90	14	19	51	125
21ur-10637	24	83	22	37	9	21	4	19
21ur-10638	5	16	6	10	35	33	25	77
21ur-10639	28	93	48	28	121	227	133	284
21ur-1064	8	23	6	44	6	7	29	25
21ur-10640	8	6	4	7	2	5	1	3
21ur-10641	22	45	15	27	65	74	73	105
21ur-10642	1	2	0	0	1	7	5	9
21ur-10643	3	4	2	5	12	6	2	5
21ur-10644	1	0	0	2	3	11	1	7
21ur-10645	2	8	3	4	3	7	1	8
21ur-10646	15	21	9	20	0	7	6	11
21ur-10647	2	3	2	1	4	4	2	7
21ur-10648	0	1	1	0	0	1	2	4
21ur-10649	17	70	38	42	148	248	184	565
21ur-1065	124	268	105	144	237	324	228	510
21ur-10650	4	2	2	2	0	0	0	2
21ur-10651	0	0	0	0	0	1	1	1
21ur-10652	4	13	8	5	19	25	15	38
21ur-10653	13	28	2	15	3	12	17	14
21ur-10654	161	249	118	189	37	67	49	122
21ur-10655	28	93	31	39	38	46	40	54
21ur-10656	13	29	7	22	2	8	5	10
21ur-10657	1	2	0	0	15	20	22	60
21ur-10658	1	3	0	0	2	8	5	6
21ur-10659	26	40	13	42	10	10	28	43
21ur-1066	0	0	0	0	0	0	0	1
21ur-10660	21	27	12	14	21	35	28	57
21ur-10661	1	3	0	1	3	4	1	9
21ur-10662	0	12	1	2	0	3	5	6
21ur-10663	0	6	0	3	4	13	2	2
21ur-10664	2	7	5	4	4	5	8	3
21ur-10665	2	3	0	2	0	0	0	0
21ur-10666	1	5	0	1	0	0	4	6
21ur-10667	49	91	56	44	87	106	60	157
21ur-10668	22	31	17	17	27	45	19	96
21ur-10669	0	4	1	2	1	1	3	7
21ur-1067	40	104	47	78	280	244	195	578
21ur-10670	7	13	7	9	25	30	26	49
21ur-10671	7	13	0	13	3	1	7	4
21ur-10672	2	6	1	11	1	4	7	12
21ur-10673	0	5	0	3	2	0	3	1
21ur-10674	21	53	16	58	15	30	26	90
21ur-10675	2	3	4	6	8	8	2	16
21ur-10676	17	26	14	18	0	1	2	7
21ur-10677	29	69	6	20	69	101	96	179
21ur-10678	18	33	24	25	47	102	57	119
21ur-10679	2	1	1	0	4	6	7	5
21ur-1068	234	350	94	254	57	120	344	417
21ur-10680	6	5	8	7	16	13	15	33
21ur-10681	9	15	7	11	48	83	43	115
21ur-10682	27	45	19	59	10	23	49	64
21ur-10683	0	1	0	0	6	1	2	1
21ur-10684	5	2	0	3	2	0	4	6
21ur-10685	10	11	5	9	8	16	15	31
21ur-10686	3	16	2	2	25	52	30	93
21ur-10687	0	0	0	0	0	0	0	1
21ur-10688	24	55	23	29	59	94	95	169
21ur-10689	2	2	1	4	3	6	6	4
21ur-1069	145	266	142	126	204	312	176	361
21ur-10690	35	78	20	76	7	8	12	48
21ur-10691	3	8	2	3	3	5	2	6
21ur-10692	6	3	5	0	28	23	27	36
21ur-10693	9	12	7	23	3	2	6	10
21ur-10694	6	12	7	5	19	22	20	19
21ur-10695	1	2	0	0	0	1	0	1
21ur-10696	31	59	44	31	144	243	114	244
21ur-10697	5	8	5	6	0	16	20	39
21ur-10698	4	10	3	4	7	11	16	12
21ur-10699	7	11	1	8	5	8	0	6
21ur-107	1009	1741	915	1193	936	2274	1293	2621
21ur-1070	76	164	38	138	39	42	86	155
21ur-10700	78	101	35	106	77	69	77	167
21ur-10701	11	11	1	17	1	4	6	12
21ur-10702	0	0	1	3	15	25	14	20
21ur-10703	7	25	6	9	28	58	29	40
21ur-10704	0	2	2	1	3	2	4	3
21ur-10705	6	11	7	6	61	74	39	89
21ur-10706	15	33	5	42	24	28	116	223
21ur-10708	0	1	2	0	1	0	1	6
21ur-10709	5	8	2	14	16	22	17	13
21ur-1071	26	67	21	78	42	73	214	298
21ur-10710	1	0	0	0	0	0	0	2
21ur-10711	17	30	10	28	7	13	3	12
21ur-10712	11	29	13	16	56	79	31	91
21ur-10713	8	21	9	13	17	15	14	17
21ur-10714	3	15	7	11	3	3	3	4
21ur-10715	0	1	0	1	0	2	0	2
21ur-10716	33	47	23	50	11	8	16	27
21ur-10717	18	26	9	21	6	12	23	37
21ur-10718	2	10	5	4	7	10	16	8
21ur-10719	8	23	7	15	4	9	13	47
21ur-1072	48	259	94	138	114	340	327	532
21ur-10720	5	5	0	1	5	2	2	4
21ur-10721	6	9	4	6	14	19	14	29
21ur-10722	10	22	3	25	6	14	29	40
21ur-10723	1	7	3	8	0	0	11	22
21ur-10724	1	3	4	1	0	0	0	1
21ur-10725	3	10	3	11	0	2	7	8
21ur-10726	8	15	3	12	1	0	3	11
21ur-10727	0	3	2	4	8	21	6	24
21ur-10728	2	5	2	2	8	8	8	12
21ur-10729	5	8	4	8	9	15	17	39
21ur-1073	9	20	6	15	72	105	50	121
21ur-10730	0	1	0	0	0	0	0	0
21ur-10731	6	40	13	43	3	3	13	22
21ur-10732	23	51	19	38	33	40	47	96
21ur-10733	9	25	5	14	1	6	9	34
21ur-10734	3	4	4	4	7	9	12	17
21ur-10735	2	0	1	0	2	5	1	8
21ur-10736	30	62	24	44	20	27	21	64
21ur-10737	44	59	62	34	144	234	150	276
21ur-10738	2	4	1	2	2	4	3	18
21ur-10739	3	6	1	3	5	2	4	10
21ur-1074	392	777	306	557	708	1095	800	1353
21ur-10740	19	40	20	16	23	54	26	66
21ur-10741	29	58	18	67	1	4	4	16
21ur-10742	1	8	7	13	6	15	7	26
21ur-10743	205	388	92	495	36	36	141	305
21ur-10744	72	111	46	192	15	37	64	107
21ur-10745	13	25	2	23	1	2	22	15
21ur-10746	12	14	7	13	106	156	143	223
21ur-10747	3	9	2	7	3	7	1	1
21ur-10748	9	18	3	26	0	1	2	3
21ur-10749	179	515	168	216	126	212	171	371
21ur-1075	744	1192	539	764	999	1661	1106	2636
21ur-10750	27	47	21	27	31	54	44	67
21ur-10751	0	0	1	0	1	1	0	0
21ur-10752	28	56	25	41	42	78	38	58
21ur-10753	18	34	20	42	3	6	23	67
21ur-10754	28	89	36	78	49	52	64	342
21ur-10755	20	38	21	44	1	6	20	27
21ur-10756	30	51	17	76	7	15	38	62
21ur-10757	14	61	48	30	24	23	25	128
21ur-10758	22	101	29	50	10	6	30	81
21ur-10759	48	152	60	143	43	55	84	135
21ur-1076	195	333	183	190	252	358	257	683
21ur-10760	16	49	24	26	17	29	18	36
21ur-10761	38	110	44	56	71	111	69	216
21ur-10762	0	0	0	0	0	1	0	0
21ur-10763	6	17	8	16	1	1	3	19
21ur-10764	109	400	150	212	134	240	188	368
21ur-10765	29	59	32	41	9	9	8	23
21ur-10766	36	101	23	77	6	10	32	56
21ur-10767	58	108	44	108	6	9	31	43
21ur-10768	60	123	10	49	6	18	52	78
21ur-10769	40	49	33	37	84	229	54	165
21ur-1077	1052	2030	991	958	825	1275	884	2046
21ur-10770	6	7	3	5	11	21	13	15
21ur-10771	0	9	0	2	4	9	4	13
21ur-10772	68	120	73	89	189	239	160	385
21ur-10773	11	14	4	13	7	3	17	35
21ur-10774	137	238	69	282	20	22	74	146
21ur-10775	7	6	0	4	1	3	3	6
21ur-10776	1	6	1	0	3	5	5	10
21ur-10777	4	12	4	17	0	0	2	4
21ur-10778	12	22	8	31	9	4	12	63
21ur-10779	0	2	1	4	3	7	3	2
21ur-1078	265	540	201	330	119	230	208	294
21ur-10780	4	14	4	7	9	18	15	23
21ur-10781	27	67	17	86	6	7	22	40
21ur-10782	4	7	4	6	13	13	18	15
21ur-10783	44	51	16	70	14	7	14	42
21ur-10784	25	52	2	13	0	1	1	7
21ur-10785	0	1	1	0	1	0	1	2
21ur-10786	0	0	0	0	0	0	0	0
21ur-10787	1	1	1	0	3	4	3	18
21ur-10788	16	28	8	12	36	17	16	36
21ur-10789	4	10	9	9	17	27	13	28
21ur-1079	415	710	326	480	2594	3195	3217	5937
21ur-10790	123	256	109	132	209	204	184	432
21ur-10791	5	20	7	13	75	91	70	135
21ur-10792	3	8	0	7	7	8	13	26
21ur-10793	15	33	12	27	14	12	27	30
21ur-10794	39	63	30	40	43	63	45	93
21ur-10795	23	43	13	19	46	42	38	84
21ur-10796	11	15	3	13	3	6	14	9
21ur-10797	41	121	12	41	37	82	88	250
21ur-10798	165	383	235	177	455	664	308	973
21ur-10799	12	20	8	26	7	14	12	16
21ur-108	799	1571	493	1323	293	484	955	1270
21ur-1080	221	522	30	102	11	63	162	285
21ur-10800	1	2	0	1	0	0	1	1
21ur-10801	78	139	42	101	10	26	45	89
21ur-10802	2	8	2	5	0	0	4	1
21ur-10803	8	14	5	7	10	17	19	29
21ur-10804	17	45	15	57	2	1	3	7
21ur-10805	58	202	18	39	85	129	99	209
21ur-10806	33	106	33	115	10	11	58	116
21ur-10807	3	5	2	11	3	0	10	2
21ur-10808	8	19	7	15	4	1	12	5
21ur-10809	59	143	29	92	6	5	22	51
21ur-1081	243	602	250	367	995	1604	1194	2496
21ur-10810	27	48	44	41	33	64	31	121
21ur-10811	23	53	22	65	18	27	19	62
21ur-10812	2	1	0	1	0	4	1	3
21ur-10813	152	416	127	382	40	73	99	197
21ur-10814	23	70	46	38	43	43	20	69
21ur-10815	20	49	9	55	20	9	41	134
21ur-10816	3	5	1	2	1	1	0	3
21ur-10817	25	46	13	43	7	5	16	44
21ur-10818	4	8	0	1	1	2	9	12
21ur-10819	2	9	2	8	15	18	19	16
21ur-1082	332	690	348	261	558	871	458	971
21ur-10820	9	16	4	10	18	20	24	35
21ur-10821	0	0	0	1	0	0	1	0
21ur-10822	0	0	1	0	0	0	1	0
21ur-10823	7	20	12	21	2	6	3	4
21ur-10824	35	71	23	18	84	98	71	111
21ur-10825	2	2	2	5	3	8	2	2
21ur-10826	0	4	2	2	6	4	2	7
21ur-10827	0	0	0	0	0	1	1	0
21ur-10828	0	0	0	2	2	0	1	0
21ur-10829	0	2	3	0	4	1	5	4
21ur-1083	169	274	143	297	503	775	601	911
21ur-10831	3	1	5	3	1	1	3	11
21ur-10832	6	5	4	4	19	18	15	22
21ur-10833	0	0	0	0	0	0	0	0
21ur-10834	2	7	4	4	3	2	1	4
21ur-10835	1	2	0	0	0	0	0	0
21ur-10836	0	0	0	0	0	0	0	0
21ur-10837	3	6	4	4	0	2	1	3
21ur-10838	20	49	30	22	21	38	15	22
21ur-10839	81	220	57	123	19	46	109	174
21ur-1084	2	11	1	3	4	5	7	17
21ur-10840	26	47	24	21	21	25	13	25
21ur-10841	371	976	569	547	669	892	695	1785
21ur-10842	9	24	1	3	3	7	13	27
21ur-10843	16	33	12	30	3	2	12	39
21ur-10844	9	18	14	12	18	34	17	53
21ur-10845	13	47	26	33	26	45	46	108
21ur-10846	0	8	4	5	23	42	16	25
21ur-10847	11	55	31	47	1	3	10	37
21ur-10848	430	1089	596	422	891	1871	876	1994
21ur-1085	476	687	423	421	2527	3458	2292	3738
21ur-10850	9	23	8	29	7	16	11	23
21ur-10851	73	175	106	67	140	309	125	260
21ur-10852	7	15	5	6	20	42	18	24
21ur-10853	15	43	15	34	1	3	6	6
21ur-10854	12	32	12	12	27	33	22	34
21ur-10855	97	174	85	138	187	212	136	391
21ur-10856	15	22	23	15	57	64	25	86
21ur-10857	0	2	0	1	1	2	0	1
21ur-10858	6	12	5	7	16	36	16	31
21ur-10859	27	42	22	25	23	47	15	42
21ur-1086	222	636	310	360	746	1022	692	1351
21ur-10860	92	259	90	145	34	84	64	137
21ur-10861	139	271	96	293	13	42	74	139
21ur-10862	2	1	1	3	7	6	6	22
21ur-10863	35	72	17	75	3	5	14	40
21ur-10864	3	19	3	6	10	21	17	43
21ur-10865	15	19	7	24	10	12	18	21
21ur-10866	6	12	5	7	5	13	17	18
21ur-10867	4	12	10	6	6	27	10	37
21ur-10868	13	24	8	14	27	47	31	52
21ur-10869	0	0	0	0	0	0	0	0
21ur-1087	2122	2180	1115	1866	4940	5731	5419	9826
21ur-10870	16	27	7	14	6	18	2	15
21ur-10871	29	38	14	49	8	13	19	47
21ur-10873	1	9	2	6	0	0	1	1
21ur-10875	2	7	1	3	1	0	0	1
21ur-10876	3	7	1	1	2	6	3	1
21ur-10877	3	2	1	0	6	9	6	10
21ur-10878	8	17	3	10	11	7	23	31
21ur-10879	9	18	5	7	6	11	7	15
21ur-1088	638	1217	474	749	1309	1969	1658	3182
21ur-10880	70	149	42	114	21	50	71	136
21ur-10881	2	5	1	4	21	22	14	24
21ur-10882	4	10	1	11	4	4	3	5
21ur-10883	19	28	16	53	12	23	84	123
21ur-10884	27	73	37	48	72	107	84	149
21ur-10885	124	379	100	204	23	27	66	126
21ur-10886	19	61	13	44	8	20	46	82
21ur-10887	118	151	80	118	87	149	62	154
21ur-10888	1	1	0	7	0	0	7	1
21ur-10889	189	282	194	156	187	346	131	477
21ur-1089	22	106	15	53	20	47	155	211
21ur-10890	55	113	23	80	15	31	46	64
21ur-10891	24	45	10	26	4	8	12	9
21ur-10892	2	5	1	4	5	5	7	17
21ur-10893	3	3	1	10	2	4	6	11
21ur-10894	4	18	6	8	11	24	12	35
21ur-10895	0	0	0	0	0	0	0	0
21ur-10896	2	6	1	2	2	0	0	1
21ur-10897	1	4	1	0	3	1	4	3
21ur-10898	5	12	5	5	2	4	3	4
21ur-10899	10	8	5	15	11	10	13	18
21ur-109	32	83	30	97	17	19	42	115
21ur-1090	286	391	214	298	459	645	410	1219
21ur-10900	0	4	1	1	0	1	3	2
21ur-10901	0	4	0	2	1	2	2	0
21ur-10902	60	161	59	177	21	28	105	149
21ur-10903	7	30	23	20	47	58	27	116
21ur-10904	15	25	11	26	1	9	11	11
21ur-10905	4	11	1	13	0	1	3	6
21ur-10906	57	166	57	154	18	48	114	185
21ur-10907	133	295	157	164	261	457	209	430
21ur-10908	29	53	10	23	4	13	11	34
21ur-10909	19	44	11	42	6	11	9	14
21ur-1091	465	637	338	382	920	1438	709	1965
21ur-10910	1	0	2	1	6	2	1	2
21ur-10911	9	12	3	20	1	4	11	16
21ur-10912	1	2	0	2	0	1	5	4
21ur-10913	6	18	10	6	23	54	23	44
21ur-10914	26	74	20	31	31	33	58	82
21ur-10915	60	129	54	125	10	18	25	51
21ur-10916	8	16	4	8	1	2	6	9
21ur-10917	1	5	1	4	0	1	1	5
21ur-10918	36	96	46	65	40	83	44	116
21ur-10919	6	10	2	6	4	9	5	10
21ur-1092	342	527	238	586	559	996	838	1218
21ur-10920	16	25	16	25	29	28	31	89
21ur-10921	3	7	1	2	1	0	2	1
21ur-10922	1	3	0	2	2	5	4	4
21ur-10923	0	1	0	0	1	0	0	0
21ur-10924	2	18	7	4	5	13	15	21
21ur-10926	8	18	9	4	40	50	41	46
21ur-10927	0	0	0	0	0	0	0	0
21ur-10928	7	13	9	11	102	98	91	250
21ur-10929	7	9	1	11	16	12	20	43
21ur-1093	0	2	0	1	0	0	0	0
21ur-10930	3	13	3	6	1	2	10	6
21ur-10931	5	10	6	5	6	11	9	17
21ur-10932	3	3	2	2	0	2	4	1
21ur-10933	20	39	8	29	17	29	21	36
21ur-10934	2	7	5	3	5	12	7	18
21ur-10935	15	25	17	14	107	173	122	187
21ur-10936	12	11	4	8	23	36	19	44
21ur-10937	5	11	4	2	15	36	26	41
21ur-10938	10	18	3	12	1	7	12	21
21ur-10939	2	1	0	1	4	4	2	4
21ur-1094	21	39	18	56	2	4	2	18
21ur-10940	8	12	5	6	6	5	3	12
21ur-10941	0	0	0	0	0	2	1	3
21ur-10942	1	0	0	1	0	5	3	5
21ur-10944	75	208	67	142	14	30	88	149
21ur-10945	6	4	2	5	3	14	6	22
21ur-10946	0	2	2	0	0	5	0	2
21ur-10947	2	9	0	2	0	5	1	1
21ur-10948	0	1	0	1	0	0	1	0
21ur-10949	4	3	1	5	5	2	5	3
21ur-1095	481	971	249	783	190	332	506	732
21ur-10950	1	9	2	3	0	0	3	5
21ur-10951	0	2	3	4	7	6	3	4
21ur-10952	3	3	1	5	2	5	3	15
21ur-10953	10	9	8	8	50	58	60	102
21ur-10954	11	15	3	13	2	18	2	11
21ur-10955	4	5	3	2	4	3	5	12
21ur-10956	6	18	8	9	21	46	34	51
21ur-10957	9	24	12	8	1	3	4	5
21ur-10958	16	43	15	60	47	77	125	211
21ur-10959	1	2	1	3	1	9	2	12
21ur-1096	95	210	74	208	23	31	59	93
21ur-10960	9	12	8	15	24	25	32	60
21ur-10961	0	1	0	0	6	4	1	3
21ur-10962	16	20	5	22	7	10	31	48
21ur-10963	11	28	18	9	22	34	21	57
21ur-10964	1	5	2	5	3	3	2	12
21ur-10965	101	269	105	117	158	222	206	381
21ur-10966	3	5	6	4	7	22	17	35
21ur-10967	12	28	0	9	2	4	14	19
21ur-10968	6	11	4	11	1	9	1	5
21ur-10969	6	14	4	12	8	6	34	23
21ur-1097	296	427	203	399	1677	2250	1874	3304
21ur-10970	3	5	4	2	1	3	2	8
21ur-10971	1	2	1	1	2	6	3	3
21ur-10972	13	23	15	11	16	31	23	51
21ur-10973	6	6	3	7	15	11	17	18
21ur-10974	0	0	0	0	0	0	0	0
21ur-10975	3	12	1	3	2	5	17	19
21ur-10976	8	12	7	13	26	27	23	33
21ur-10977	1	2	1	0	0	1	2	2
21ur-10978	4	8	3	5	8	8	12	13
21ur-10979	7	5	3	7	3	1	3	7
21ur-1098	28	45	21	38	34	47	35	105
21ur-10980	15	36	16	54	3	7	4	20
21ur-10981	1	5	1	3	0	1	2	3
21ur-10982	18	77	38	29	163	189	160	529
21ur-10983	1	4	3	1	72	37	26	115
21ur-10984	1	6	4	9	5	8	3	11
21ur-10985	53	82	34	76	5	25	32	56
21ur-10986	0	5	0	2	1	6	0	4
21ur-10988	9	14	9	7	21	30	21	23
21ur-10989	1	1	0	1	3	10	2	8
21ur-1099	229	389	171	283	739	1027	613	1256
21ur-10990	4	8	1	7	0	1	6	3
21ur-10992	8	62	19	43	5	6	19	39
21ur-10993	0	0	0	0	0	0	0	0
21ur-10994	55	83	18	21	49	82	46	151
21ur-10995	7	9	5	7	25	41	8	51
21ur-10996	29	34	11	26	3	5	15	13
21ur-10997	3	1	1	0	5	9	5	14
21ur-10998	21	28	2	2	4	6	11	12
21ur-10999	130	388	173	202	358	493	363	713
21ur-11	128	161	38	145	39	63	137	194
21ur-110	152	275	75	244	15	40	91	144
21ur-1100	61	173	95	152	126	227	129	329
21ur-11000	21	28	12	16	69	92	74	139
21ur-11001	57	118	41	80	3	19	31	59
21ur-11002	90	199	74	226	10	21	73	131
21ur-11003	37	78	48	32	36	76	41	64
21ur-11004	8	13	4	10	1	1	3	17
21ur-11005	30	55	21	37	138	179	108	275
21ur-11006	6	3	2	5	20	24	25	67
21ur-11007	16	39	11	26	2	6	12	13
21ur-11008	70	92	23	116	16	10	33	107
21ur-11009	13	13	7	10	17	14	11	20
21ur-1101	2	4	1	5	0	0	0	0
21ur-11010	9	15	5	19	1	1	9	10
21ur-11011	2	1	1	1	0	1	5	2
21ur-11012	3	5	2	0	1	1	2	5
21ur-11013	20	24	6	14	16	21	23	13
21ur-11014	24	62	37	29	60	99	49	69
21ur-11015	227	532	174	514	51	91	179	289
21ur-11016	1	3	3	3	7	16	10	49
21ur-11017	1	3	0	0	0	0	0	4
21ur-11018	2	7	1	0	0	1	1	6
21ur-11019	0	0	0	0	1	1	0	0
21ur-1102	344	825	409	564	994	1183	1081	2432
21ur-11020	5	17	5	4	14	18	13	22
21ur-11021	4	5	3	0	11	5	3	14
21ur-11022	1	4	0	2	6	8	4	18
21ur-11023	20	46	15	14	42	62	37	61
21ur-11024	6	9	3	6	10	21	14	34
21ur-11025	1	2	0	0	0	0	2	9
21ur-11026	50	78	24	135	11	19	60	98
21ur-11027	53	82	42	55	140	163	158	290
21ur-11028	13	16	9	15	35	43	44	52
21ur-11029	4	4	2	4	7	11	16	20
21ur-1103	5	15	0	7	12	26	16	56
21ur-11030	40	69	31	58	69	132	72	177
21ur-11031	13	26	8	32	7	10	30	39
21ur-11032	2	8	0	2	4	8	10	23
21ur-11033	4	9	4	12	0	4	8	15
21ur-11034	24	53	41	102	2	7	30	45
21ur-11035	5	9	5	6	2	16	10	13
21ur-11036	19	62	22	33	72	138	130	240
21ur-11037	21	31	10	28	2	3	10	22
21ur-11038	10	28	19	22	58	74	67	118
21ur-11039	3	18	6	6	14	12	14	51
21ur-1104	225	392	198	192	350	529	408	715
21ur-11040	7	16	14	5	20	33	25	52
21ur-11041	37	93	26	74	8	23	41	60
21ur-11042	75	140	51	113	63	150	129	217
21ur-11043	5	15	5	7	18	37	45	82
21ur-11044	0	4	0	7	1	0	1	7
21ur-11045	6	23	15	12	96	111	115	194
21ur-11046	4	6	5	7	30	53	35	92
21ur-11047	11	18	9	9	24	45	24	64
21ur-11049	30	45	15	105	1	2	1	6
21ur-1105	99	263	210	104	498	1705	690	1246
21ur-11050	3	12	7	5	38	33	32	81
21ur-11051	31	44	18	52	60	99	70	113
21ur-11052	6	12	5	10	12	17	17	21
21ur-11054	80	152	50	215	6	10	24	85
21ur-11056	17	25	4	10	1	3	5	5
21ur-11057	18	33	14	42	1	1	7	15
21ur-11058	28	38	14	72	7	6	36	70
21ur-11059	0	0	0	0	3	3	3	4
21ur-1106	62	70	47	142	7	13	47	126
21ur-11060	6	13	6	21	0	2	2	0
21ur-11061	47	111	50	54	344	425	348	733
21ur-11062	12	28	19	11	51	98	46	74
21ur-11063	17	42	15	26	10	29	34	64
21ur-11064	19	76	24	77	1	8	8	29
21ur-11065	3	4	2	4	0	1	1	1
21ur-11066	2	5	1	4	8	12	9	11
21ur-11067	13	14	11	22	14	23	9	25
21ur-11068	0	2	1	0	0	1	1	1
21ur-11069	2	0	1	2	3	2	3	5
21ur-1107	68	137	62	84	155	223	157	277
21ur-11070	0	4	2	4	6	15	29	43
21ur-11071	16	21	12	15	10	26	23	24
21ur-11072	18	35	31	22	26	35	21	44
21ur-11073	8	10	7	16	18	16	13	26
21ur-11074	0	0	0	0	0	0	0	0
21ur-11075	15	47	9	25	8	15	18	34
21ur-11076	0	5	0	2	8	10	3	12
21ur-11077	1	1	4	6	0	0	4	5
21ur-11078	129	272	97	188	5	4	10	29
21ur-11079	0	1	0	1	0	0	1	1
21ur-1108	211	411	166	354	500	566	672	1239
21ur-11080	3	0	2	7	1	3	3	7
21ur-11081	4	11	3	7	4	4	2	5
21ur-11082	3	20	15	20	19	22	8	58
21ur-11083	3	6	1	1	12	17	3	15
21ur-11084	0	0	0	0	1	3	0	2
21ur-11085	0	1	0	1	0	0	0	0
21ur-11086	6	7	5	2	12	25	8	17
21ur-11087	1	5	0	0	4	12	8	11
21ur-11088	0	0	0	3	1	2	2	9
21ur-11089	19	42	16	30	0	5	4	25
21ur-1109	1859	3429	1782	1747	3718	5553	3601	6925
21ur-11090	21	34	9	19	16	22	13	21
21ur-11091	6	17	7	8	28	32	35	86
21ur-11092	5	6	3	0	13	12	7	6
21ur-11093	6	4	1	6	1	0	4	9
21ur-11094	21	48	24	31	92	99	103	206
21ur-11095	1	7	4	0	9	6	3	11
21ur-11096	0	0	2	2	1	0	0	2
21ur-11097	2	9	1	3	3	0	4	4
21ur-11098	23	49	21	24	8	15	2	11
21ur-11099	14	43	14	8	45	58	50	82
21ur-111	246	935	235	778	54	57	225	505
21ur-1110	139	288	175	94	422	950	378	900
21ur-11100	0	0	0	2	0	0	0	0
21ur-11101	1	4	2	2	0	0	0	1
21ur-11102	34	40	9	18	0	0	1	2
21ur-11104	37	115	38	72	12	18	27	56
21ur-11105	0	1	0	0	0	1	0	0
21ur-11106	33	110	40	78	30	42	57	92
21ur-11107	7	3	0	2	2	2	0	5
21ur-11108	1	4	0	6	2	4	5	1
21ur-11109	7	27	16	10	33	77	39	60
21ur-11110	1	5	2	9	1	0	3	2
21ur-11111	3	8	2	6	6	3	8	17
21ur-11112	64	108	23	103	22	37	67	149
21ur-11113	8	10	8	12	11	15	4	23
21ur-11115	2	7	2	1	13	3	10	12
21ur-11116	39	74	21	58	23	49	32	97
21ur-11117	5	7	6	3	8	15	8	16
21ur-11118	95	201	70	139	6	2	5	13
21ur-11119	7	9	1	6	4	3	9	16
21ur-1112	1200	1931	925	1216	3043	4509	3473	6196
21ur-11120	124	316	133	219	38	39	30	79
21ur-11121	0	0	0	2	1	0	1	3
21ur-11122	2	3	4	1	18	10	11	20
21ur-11123	10	43	14	11	6	17	24	31
21ur-11124	3	11	3	7	1	2	7	8
21ur-11125	6	11	3	4	7	10	13	17
21ur-11126	4	10	2	8	9	11	10	30
21ur-11127	237	503	230	444	707	1081	765	1507
21ur-11128	23	26	16	32	23	35	41	77
21ur-11129	0	4	1	1	1	0	5	3
21ur-1113	293	517	309	285	859	1351	808	1594
21ur-11130	13	27	11	16	5	14	8	18
21ur-11131	3	1	2	2	3	2	3	8
21ur-11132	6	21	4	24	0	0	0	8
21ur-11133	21	39	19	15	68	53	41	136
21ur-11135	118	221	30	69	93	182	30	55
21ur-11136	1	10	0	1	0	2	4	7
21ur-11137	4	16	6	4	1	10	7	22
21ur-11138	7	10	1	6	3	5	14	20
21ur-11139	0	3	2	0	5	2	2	13
21ur-1114	0	0	0	0	0	0	0	0
21ur-11140	2	4	1	0	2	10	5	16
21ur-11141	41	41	18	60	10	19	43	54
21ur-11142	0	1	0	0	1	0	2	5
21ur-11143	3	8	3	8	1	2	8	7
21ur-11144	1	4	1	4	0	0	0	2
21ur-11145	11	15	9	19	7	5	8	11
21ur-11146	2	3	1	1	2	6	4	3
21ur-11147	0	2	1	2	6	1	6	10
21ur-11148	2	0	3	2	6	15	12	10
21ur-11149	2	1	0	0	5	10	2	13
21ur-1115	572	1166	663	626	1905	2937	1882	4170
21ur-11150	10	12	6	6	36	49	43	54
21ur-11151	5	14	4	14	13	14	12	35
21ur-11152	0	3	3	3	0	2	3	4
21ur-11153	1	2	0	0	0	0	1	3
21ur-11154	36	31	10	62	9	3	36	54
21ur-11155	10	29	4	20	9	3	6	25
21ur-11156	11	26	10	25	15	26	9	76
21ur-11157	2	14	1	13	5	4	15	41
21ur-11158	1	1	0	0	1	2	2	1
21ur-11159	8	16	3	4	1	4	5	11
21ur-1116	545	1269	643	706	2056	2701	1888	3956
21ur-11160	1	1	0	2	2	4	2	3
21ur-11161	15	46	13	34	4	6	12	16
21ur-11162	4	3	6	9	3	1	2	3
21ur-11164	2	3	2	3	2	0	0	5
21ur-11165	0	0	0	0	0	0	0	0
21ur-11166	2	8	8	3	24	27	16	19
21ur-11167	4	7	6	2	4	5	9	10
21ur-11168	6	9	3	5	2	3	1	9
21ur-11169	6	9	4	7	15	25	13	28
21ur-1117	172	253	87	333	96	126	267	294
21ur-11171	12	13	5	10	3	1	3	9
21ur-11172	45	103	9	39	15	28	24	49
21ur-11173	32	58	23	81	8	8	16	59
21ur-11174	3	14	3	2	8	14	22	18
21ur-11175	26	70	25	48	6	8	6	35
21ur-11176	1	3	1	5	2	0	0	3
21ur-11177	37	75	23	100	53	71	122	202
21ur-11178	32	83	18	85	12	40	92	122
21ur-11179	48	111	55	139	56	110	121	263
21ur-1118	7	7	6	12	41	47	28	74
21ur-11180	51	121	37	128	12	32	73	106
21ur-11181	15	28	14	10	22	49	45	73
21ur-11182	14	23	8	36	2	4	15	38
21ur-11183	73	208	112	133	112	147	108	243
21ur-11184	55	65	28	117	68	53	49	151
21ur-11185	4	8	1	6	10	13	40	49
21ur-11186	8	50	19	44	8	8	14	35
21ur-11187	14	18	7	9	14	17	13	25
21ur-11188	31	71	34	66	43	67	22	123
21ur-11189	12	27	10	11	18	19	13	18
21ur-1119	140	234	141	176	482	561	500	1027
21ur-11190	3	10	5	14	2	8	12	19
21ur-11191	19	37	7	15	27	34	20	52
21ur-11192	8	43	17	33	93	114	108	223
21ur-11193	3	7	0	3	1	1	3	1
21ur-11194	2	3	0	6	3	4	2	4
21ur-11195	1	4	1	3	0	0	2	0
21ur-11196	3	4	3	1	0	2	5	5
21ur-11197	54	119	41	98	2	18	26	38
21ur-11198	1	3	2	4	0	2	2	1
21ur-11199	11	19	13	14	10	16	8	33
21ur-112	154	317	76	246	53	59	224	307
21ur-1120	60	359	124	193	1157	1784	1667	2533
21ur-11200	6	11	2	3	5	13	8	14
21ur-11201	271	428	129	295	27	73	63	156
21ur-11202	42	107	13	29	4	6	12	35
21ur-11203	42	64	17	52	5	14	29	57
21ur-11204	15	45	27	21	31	39	23	69
21ur-11205	15	23	12	28	0	2	5	15
21ur-11206	8	17	12	7	16	35	13	50
21ur-11207	45	89	53	47	96	100	89	163
21ur-11208	1	13	3	4	3	3	4	6
21ur-11209	3	6	0	1	3	6	0	11
21ur-1121	754	1150	582	744	2029	2419	2210	3204
21ur-11210	2	0	0	0	2	1	0	4
21ur-11211	20	32	20	18	45	43	32	60
21ur-11212	26	62	21	58	6	6	30	36
21ur-11213	279	386	212	194	204	226	110	440
21ur-11214	131	262	86	193	54	127	76	171
21ur-11215	103	184	90	105	137	230	116	287
21ur-11216	11	33	17	17	43	67	35	87
21ur-11217	88	232	83	228	19	30	65	142
21ur-11218	3	3	3	4	2	4	3	14
21ur-11219	197	449	168	544	55	95	214	309
21ur-1122	605	964	531	589	2396	4617	2577	4122
21ur-11220	15	34	11	22	17	37	38	36
21ur-11221	4	21	2	4	4	14	3	11
21ur-11222	237	552	158	499	19	52	63	121
21ur-11223	4	10	6	9	10	16	19	32
21ur-11224	1	2	1	0	7	8	9	14
21ur-11225	3	7	7	6	6	7	4	30
21ur-11226	1	3	0	2	0	0	0	4
21ur-11227	6	6	1	5	1	4	11	7
21ur-11228	0	0	0	0	0	0	0	0
21ur-11229	12	15	2	7	7	15	7	18
21ur-1123	10	19	4	15	8	10	1	9
21ur-11230	1	4	2	8	1	4	8	9
21ur-11231	5	28	10	16	62	60	36	74
21ur-11232	0	1	0	3	2	5	6	6
21ur-11233	64	135	80	80	122	137	73	303
21ur-11234	64	258	73	179	33	44	58	145
21ur-11235	7	31	13	39	2	1	4	46
21ur-11236	49	124	85	60	114	197	109	346
21ur-11237	2	5	7	7	4	12	11	21
21ur-11238	18	53	27	27	55	61	47	81
21ur-11239	11	32	3	5	25	43	32	93
21ur-1124	405	921	448	488	2208	3126	2153	4515
21ur-11240	63	130	21	135	15	27	81	62
21ur-11241	30	62	23	30	32	47	39	102
21ur-11242	23	58	23	47	28	28	39	125
21ur-11243	56	131	88	99	173	232	184	348
21ur-11244	31	91	31	55	13	19	38	69
21ur-11245	2	1	0	0	2	3	0	6
21ur-11246	80	119	53	156	3	13	19	45
21ur-11247	3	2	0	11	3	2	2	12
21ur-11248	19	25	14	16	25	21	21	51
21ur-11249	10	29	10	13	26	38	28	34
21ur-1125	96	166	45	121	11	27	93	133
21ur-11250	161	293	100	254	44	85	149	239
21ur-11251	25	53	26	77	30	42	41	124
21ur-11252	24	46	19	48	21	18	32	44
21ur-11253	15	50	28	21	46	109	43	92
21ur-11254	4	15	4	14	23	9	6	20
21ur-11255	100	206	91	131	162	263	110	304
21ur-11256	0	2	3	0	3	6	4	9
21ur-11257	13	20	2	4	26	42	18	36
21ur-11258	8	12	6	11	24	28	22	46
21ur-11259	64	169	72	71	103	164	84	189
21ur-1126	969	1662	978	1184	1532	1927	1622	3515
21ur-11260	3	2	3	6	2	2	10	4
21ur-11261	0	3	0	2	0	0	0	0
21ur-11262	11	30	7	23	1	4	3	9
21ur-11263	42	83	30	119	4	22	49	53
21ur-11264	1	1	0	2	0	0	1	0
21ur-11265	11	12	7	12	45	65	37	75
21ur-11266	69	211	64	226	33	23	51	176
21ur-11267	23	54	7	12	15	17	8	38
21ur-11268	19	34	7	30	2	2	7	13
21ur-11269	17	21	14	34	36	43	54	56
21ur-1127	204	345	126	287	187	276	222	359
21ur-11270	15	56	18	23	48	55	38	46
21ur-11271	6	15	4	20	2	4	15	23
21ur-11272	281	634	295	334	489	790	491	1038
21ur-11274	7	14	3	14	9	12	13	27
21ur-11275	0	0	0	1	0	0	0	0
21ur-11277	0	1	1	1	0	0	1	1
21ur-11278	15	21	10	16	45	79	43	90
21ur-11279	5	13	4	10	0	2	5	5
21ur-1128	209	326	156	228	208	261	242	452
21ur-11280	20	38	8	21	16	45	44	55
21ur-11281	1	5	2	4	6	1	2	1
21ur-11282	4	2	5	1	3	3	3	4
21ur-11283	12	22	4	30	1	5	20	25
21ur-11285	0	0	2	0	0	2	0	0
21ur-11286	0	2	0	2	0	0	0	3
21ur-11287	32	39	15	27	47	70	33	61
21ur-11289	17	52	11	56	0	1	1	7
21ur-1129	2098	3674	1497	2019	3145	4616	3557	6277
21ur-11290	0	1	2	0	2	2	1	1
21ur-11291	176	385	197	207	209	351	186	509
21ur-11292	108	235	78	233	7	24	53	71
21ur-11293	20	81	21	74	1	2	12	40
21ur-11294	3	1	1	2	4	6	3	4
21ur-11295	7	12	10	4	8	27	10	24
21ur-11296	26	79	46	68	69	147	101	170
21ur-11297	3	2	5	4	5	7	4	7
21ur-11298	499	891	466	370	497	727	494	1002
21ur-11299	3	7	4	8	15	33	16	25
21ur-113	155	852	245	402	235	309	251	667
21ur-1130	240	422	97	311	48	55	170	248
21ur-11300	6	16	1	12	7	1	11	17
21ur-11301	250	438	167	341	98	240	152	280
21ur-11302	9	43	16	26	9	28	18	32
21ur-11303	71	169	77	58	134	221	67	233
21ur-11304	9	13	4	16	4	5	16	14
21ur-11305	78	99	40	151	112	163	152	296
21ur-11306	2	11	5	10	8	22	17	38
21ur-11308	11	6	6	14	32	29	37	102
21ur-11309	13	54	12	24	1	4	7	8
21ur-1131	57	99	35	126	8	15	27	77
21ur-11310	1	5	1	2	0	0	1	3
21ur-11311	42	82	30	109	8	18	47	69
21ur-11312	24	42	0	12	1	1	4	19
21ur-11313	8	77	32	50	12	11	43	76
21ur-11314	11	44	19	16	73	179	62	139
21ur-11315	25	88	26	78	1	9	15	17
21ur-11316	3	15	6	15	2	3	5	10
21ur-11317	55	185	109	89	72	162	93	247
21ur-11318	0	3	3	3	0	0	0	0
21ur-11319	0	1	2	0	6	7	1	8
21ur-1132	64	123	95	72	89	167	80	367
21ur-11320	11	33	16	30	6	10	9	19
21ur-11321	14	41	12	16	32	81	35	82
21ur-11322	43	151	61	94	26	62	39	80
21ur-11323	10	31	9	16	7	8	8	22
21ur-11324	27	60	24	56	5	6	13	33
21ur-11325	7	5	5	10	4	4	25	34
21ur-11326	87	409	156	142	144	327	176	262
21ur-11327	110	303	108	188	56	62	80	147
21ur-11328	2	12	0	2	9	17	6	18
21ur-11329	7	22	17	23	31	62	24	62
21ur-1133	0	0	0	0	0	0	0	1
21ur-11330	54	75	19	68	3	15	27	52
21ur-11331	88	200	49	82	18	33	53	71
21ur-11332	15	44	20	36	12	30	39	48
21ur-11333	5	12	6	4	12	20	3	17
21ur-11334	5	11	5	6	2	9	7	23
21ur-11335	0	5	5	3	32	43	28	57
21ur-11336	0	1	0	3	0	0	0	1
21ur-11337	0	1	2	4	0	0	1	2
21ur-11338	5	5	3	0	2	3	0	5
21ur-11339	19	20	8	30	12	30	34	69
21ur-1134	209	351	121	411	79	114	239	372
21ur-11340	1	2	1	0	1	0	0	2
21ur-11341	17	34	18	34	13	21	14	24
21ur-11342	12	34	15	14	11	35	16	30
21ur-11343	3	8	1	10	10	15	11	21
21ur-11344	1	5	3	0	1	0	0	0
21ur-11345	2	4	1	0	0	0	0	1
21ur-11346	1	1	0	2	0	0	1	0
21ur-11347	28	53	38	24	15	23	10	26
21ur-11348	27	63	26	32	50	49	80	109
21ur-11349	0	4	0	1	0	0	0	3
21ur-1135	292	347	167	261	622	679	491	1013
21ur-11350	19	48	33	24	91	158	85	185
21ur-11351	0	3	0	2	0	0	0	1
21ur-11352	16	28	13	33	1	5	11	35
21ur-11353	14	39	11	20	20	42	17	40
21ur-11354	30	49	24	34	88	87	82	176
21ur-11355	8	16	4	46	6	2	22	39
21ur-11357	7	10	2	11	3	10	22	29
21ur-11358	1	11	0	6	0	3	3	2
21ur-11359	11	38	17	16	58	102	45	117
21ur-11360	59	178	72	96	49	66	47	100
21ur-11361	2	7	3	2	1	5	6	8
21ur-11362	5	3	2	7	4	8	9	20
21ur-11363	13	27	8	20	2	3	8	18
21ur-11364	11	32	29	24	26	26	20	44
21ur-11365	105	273	88	295	28	54	115	146
21ur-11366	1	6	2	6	0	0	3	3
21ur-11367	35	84	15	26	13	32	78	84
21ur-11368	22	59	19	33	1	4	9	11
21ur-11369	3	10	4	11	1	2	1	10
21ur-1137	53	110	54	30	151	170	104	178
21ur-11370	4	14	9	12	21	31	16	33
21ur-11371	4	13	5	6	12	24	22	70
21ur-11373	1	0	0	0	0	1	0	0
21ur-11374	0	4	3	2	6	8	7	8
21ur-11375	31	67	20	85	21	20	43	141
21ur-11376	3	15	2	7	10	11	15	33
21ur-11377	6	21	15	18	14	14	18	19
21ur-11378	42	83	30	50	202	242	207	369
21ur-11379	7	34	9	34	8	39	48	56
21ur-1138	127	216	56	181	9	31	21	61
21ur-11380	112	267	145	129	156	254	126	384
21ur-11381	126	309	40	45	252	470	307	663
21ur-11382	1	1	1	1	2	1	0	10
21ur-11383	16	30	7	10	16	17	16	33
21ur-11384	51	108	39	113	6	25	45	63
21ur-11385	4	2	0	1	1	3	1	3
21ur-11386	4	15	8	7	18	44	34	44
21ur-11387	2	5	0	4	2	1	1	3
21ur-11388	2	0	0	3	0	1	0	7
21ur-11389	41	86	53	42	125	179	98	253
21ur-1139	35	60	28	37	32	56	40	158
21ur-11390	35	65	23	60	2	3	22	31
21ur-11391	2	6	6	9	4	1	1	4
21ur-11392	0	1	1	3	1	6	7	2
21ur-11393	2	9	2	3	29	48	29	57
21ur-11394	16	19	12	29	13	12	36	46
21ur-11395	1	1	1	3	2	1	2	6
21ur-11396	4	2	0	3	0	0	0	2
21ur-11397	2	2	0	2	2	12	2	14
21ur-11398	1	4	2	2	3	13	3	10
21ur-11399	2	9	4	9	10	34	17	41
21ur-114	323	525	150	571	10	15	52	110
21ur-1140	65	160	14	46	9	28	85	155
21ur-11400	5	6	0	5	0	5	4	1
21ur-11401	0	0	1	1	1	0	1	1
21ur-11402	2	1	1	3	13	12	9	19
21ur-11403	0	2	0	1	0	1	0	3
21ur-11404	3	12	11	10	11	10	3	22
21ur-11405	3	5	1	1	9	9	9	14
21ur-11406	33	50	20	36	30	76	24	42
21ur-11407	2	0	0	2	2	3	3	13
21ur-11408	0	3	1	0	3	0	2	2
21ur-11409	2	2	1	2	1	2	7	1
21ur-1141	3	5	4	5	10	13	3	13
21ur-11410	26	43	21	24	97	203	137	260
21ur-11411	6	17	8	6	6	9	2	12
21ur-11412	5	13	8	18	2	5	22	19
21ur-11413	23	44	12	42	7	12	22	32
21ur-11414	6	15	7	10	27	39	19	60
21ur-11415	0	0	0	0	0	0	1	6
21ur-11416	3	7	2	2	2	1	23	20
21ur-11417	2	7	1	6	0	1	1	4
21ur-11419	0	0	1	0	0	0	0	0
21ur-1142	496	737	394	674	1373	1668	1391	2733
21ur-11420	0	0	0	0	0	0	0	0
21ur-11421	3	5	2	5	1	1	4	5
21ur-11423	80	138	48	124	28	43	93	197
21ur-11424	4	7	5	6	43	54	28	48
21ur-11425	6	8	4	7	3	3	0	6
21ur-11426	2	5	1	4	15	10	11	25
21ur-11427	0	2	0	0	5	3	5	17
21ur-11428	0	1	0	1	0	1	0	2
21ur-11429	3	13	2	2	2	10	3	14
21ur-1143	40	83	51	72	1061	1407	1033	1709
21ur-11430	2	4	0	2	0	1	0	0
21ur-11431	8	15	2	25	8	5	24	40
21ur-11432	0	1	0	0	0	0	3	3
21ur-11433	0	1	2	0	2	4	3	2
21ur-11434	3	2	2	0	0	1	1	8
21ur-11435	3	3	2	1	3	8	4	1
21ur-11436	29	65	27	103	12	23	40	59
21ur-11438	0	1	1	0	0	0	0	1
21ur-11439	12	13	5	22	7	25	27	31
21ur-1144	100	171	60	322	90	106	288	377
21ur-11440	11	39	17	15	35	88	29	58
21ur-11441	176	367	93	219	21	27	53	128
21ur-11442	25	37	17	53	6	15	29	50
21ur-11443	3	7	3	3	1	3	4	11
21ur-11444	3	9	1	3	6	8	4	6
21ur-11445	2	1	0	1	1	8	0	8
21ur-11446	30	73	46	37	79	118	65	245
21ur-11447	15	25	7	37	6	5	13	33
21ur-11448	1	6	1	1	9	13	5	13
21ur-11449	28	56	36	27	77	144	98	144
21ur-1145	16	47	21	29	88	94	82	156
21ur-11450	8	24	7	16	33	36	21	39
21ur-11451	9	14	7	9	30	28	20	56
21ur-11452	1	6	1	1	1	6	15	16
21ur-11453	1	8	0	2	8	7	13	30
21ur-11454	0	0	0	0	0	0	0	0
21ur-11455	3	5	2	3	3	12	2	17
21ur-11457	72	194	70	189	10	22	51	99
21ur-11458	19	50	27	25	78	86	69	177
21ur-11459	89	162	96	84	169	100	84	433
21ur-1146	117	197	20	65	31	97	129	201
21ur-11460	13	7	3	12	5	8	10	16
21ur-11461	12	36	4	33	3	16	23	46
21ur-11462	29	40	11	50	5	6	31	57
21ur-11463	50	131	61	68	183	204	202	312
21ur-11464	2	6	1	1	12	7	10	24
21ur-11465	4	14	5	3	0	1	2	1
21ur-11466	3	9	6	8	10	9	12	39
21ur-11467	2	7	2	7	0	0	2	2
21ur-11468	4	10	6	25	8	9	10	17
21ur-11469	40	95	38	95	9	29	58	125
21ur-1147	538	983	287	881	351	538	806	1278
21ur-11470	6	19	8	12	67	102	84	143
21ur-11471	12	24	13	14	36	26	15	67
21ur-11473	10	15	4	13	6	4	3	6
21ur-11474	125	272	167	222	233	348	283	688
21ur-11475	6	7	6	4	3	6	6	17
21ur-11476	11	15	8	13	23	26	19	29
21ur-11477	3	7	4	4	3	6	1	9
21ur-11478	21	63	15	30	9	16	30	42
21ur-11479	4	3	1	6	4	6	3	8
21ur-1148	565	1064	621	448	823	1609	712	1919
21ur-11480	0	1	0	0	0	0	0	0
21ur-11481	22	59	15	45	12	14	48	101
21ur-11482	23	28	15	8	53	86	49	128
21ur-11483	3	18	4	8	2	3	9	14
21ur-11484	16	24	14	28	3	5	8	9
21ur-11485	32	90	30	37	135	213	133	329
21ur-11486	18	49	19	69	4	14	34	41
21ur-11487	1	6	1	0	5	9	2	6
21ur-11488	11	17	5	13	1	9	20	21
21ur-11489	40	80	8	42	4	7	12	38
21ur-1149	197	334	160	231	868	1161	1197	1744
21ur-11490	5	17	6	12	9	26	13	25
21ur-11491	0	2	4	6	3	4	5	7
21ur-11492	0	0	1	1	0	0	0	1
21ur-11493	84	159	65	150	48	103	85	232
21ur-11494	1	3	0	1	7	2	4	9
21ur-11495	14	41	22	15	73	94	50	102
21ur-11496	11	10	10	20	44	39	36	96
21ur-11497	4	4	3	4	27	19	16	39
21ur-11498	78	197	60	122	14	29	44	76
21ur-11499	3	3	2	10	0	5	9	8
21ur-115	21	42	23	19	41	69	25	65
21ur-1150	203	425	242	230	177	276	173	767
21ur-11500	21	32	11	15	19	25	28	55
21ur-11501	3	7	5	5	30	51	41	61
21ur-11502	6	20	4	25	3	1	10	7
21ur-11503	6	2	1	17	2	1	8	11
21ur-11504	0	0	0	0	0	0	0	0
21ur-11505	4	6	4	20	2	5	3	16
21ur-11506	7	17	12	14	179	338	214	455
21ur-11507	0	3	0	2	0	1	2	0
21ur-11508	1	5	1	3	4	5	3	4
21ur-11509	1	1	1	0	0	0	1	0
21ur-1151	3	5	0	7	2	5	4	7
21ur-11510	54	114	50	146	27	28	93	169
21ur-11511	38	70	34	39	108	154	86	166
21ur-11512	119	353	73	286	28	52	147	210
21ur-11513	37	61	19	38	6	17	14	25
21ur-11514	24	50	18	61	15	13	38	69
21ur-11515	17	39	11	20	44	50	22	68
21ur-11516	1	2	1	1	11	16	7	14
21ur-11517	53	153	69	65	294	434	329	576
21ur-11518	17	14	3	15	8	5	6	7
21ur-11519	2	2	0	0	0	0	1	1
21ur-1152	477	852	381	594	417	698	467	1088
21ur-11520	14	45	7	28	9	15	19	20
21ur-11521	35	56	27	32	71	107	63	103
21ur-11522	160	302	93	300	36	63	119	182
21ur-11523	0	8	2	5	1	3	3	12
21ur-11524	0	3	1	2	27	31	25	35
21ur-11525	6	4	1	5	0	0	2	3
21ur-11526	6	23	7	16	1	2	6	12
21ur-11527	0	1	1	0	0	0	0	0
21ur-11528	4	7	2	4	4	7	6	25
21ur-11529	2	5	8	1	5	4	0	6
21ur-1153	173	435	232	330	272	395	218	535
21ur-11530	3	4	0	0	0	2	0	1
21ur-11531	15	13	7	8	1	0	2	2
21ur-11532	9	27	6	14	2	10	12	27
21ur-11533	3	14	2	9	4	6	4	21
21ur-11534	5	5	1	7	2	7	12	8
21ur-11535	3	5	3	4	4	7	10	13
21ur-11536	4	7	2	3	4	2	3	20
21ur-11537	4	5	5	5	2	2	6	12
21ur-11538	2	8	6	12	6	5	2	14
21ur-11539	2	5	1	2	3	5	6	14
21ur-1154	251	526	305	200	371	862	294	692
21ur-11540	4	7	2	5	1	3	7	6
21ur-11541	4	12	3	4	2	1	0	2
21ur-11542	0	2	2	3	4	18	1	12
21ur-11543	1	2	0	0	0	0	2	0
21ur-11544	6	16	4	12	14	24	17	34
21ur-11545	3	8	2	10	2	1	1	6
21ur-11546	1	6	1	3	1	1	5	6
21ur-11547	74	162	47	141	22	28	56	134
21ur-11548	6	13	5	13	4	9	6	11
21ur-11549	1	0	0	1	1	0	1	3
21ur-1155	268	590	198	561	507	822	760	1414
21ur-11550	5	20	8	21	2	12	13	11
21ur-11551	50	101	30	70	22	30	62	143
21ur-11552	3	3	1	0	3	7	2	2
21ur-11553	68	160	78	58	58	76	47	124
21ur-11554	14	26	7	40	2	4	17	20
21ur-11555	7	15	6	6	78	75	56	133
21ur-11556	2	7	8	4	6	18	3	22
21ur-11557	4	6	5	7	17	12	17	38
21ur-11558	5	8	3	9	3	7	11	8
21ur-11559	31	87	25	80	5	11	8	35
21ur-1156	176	350	153	247	313	481	426	716
21ur-11560	12	17	6	17	3	6	3	14
21ur-11561	1	5	4	3	0	1	1	1
21ur-11562	0	1	0	0	1	0	2	4
21ur-11563	37	66	27	72	7	11	36	45
21ur-11564	3	1	2	1	0	0	0	0
21ur-11565	0	0	0	0	0	0	0	0
21ur-11566	3	2	1	0	1	3	1	1
21ur-11567	0	0	0	0	0	0	0	0
21ur-11568	91	349	44	52	128	186	135	436
21ur-11569	1	1	2	2	17	7	15	53
21ur-1157	209	371	188	294	464	790	602	1127
21ur-11570	3	10	1	9	2	1	2	10
21ur-11571	26	30	14	49	26	30	36	73
21ur-11572	8	18	5	16	3	11	7	11
21ur-11573	1	1	1	4	0	0	0	0
21ur-11574	9	20	7	24	3	2	6	18
21ur-11575	5	11	5	14	1	7	14	15
21ur-11576	4	0	0	1	0	0	4	1
21ur-11577	1	3	1	6	0	0	1	5
21ur-11578	2	3	0	3	1	0	0	0
21ur-11579	2	2	5	0	1	7	3	10
21ur-1158	236	286	85	246	38	47	125	205
21ur-11580	1	4	1	1	0	0	5	1
21ur-11581	0	0	0	1	0	0	0	0
21ur-11582	2	0	0	0	0	0	0	0
21ur-11583	14	19	9	11	15	10	7	33
21ur-11584	7	7	7	7	0	3	2	7
21ur-11585	0	1	0	0	0	0	0	0
21ur-11586	7	8	4	6	21	34	37	86
21ur-11587	0	4	0	1	1	4	3	0
21ur-11588	11	9	4	11	0	0	0	4
21ur-11589	21	41	14	16	3	7	2	14
21ur-1159	274	525	191	259	583	862	687	1302
21ur-11590	1	3	0	2	2	1	17	16
21ur-11591	17	30	8	33	1	8	9	22
21ur-11592	2	6	2	1	2	1	0	1
21ur-11593	1	1	3	2	0	0	0	5
21ur-11595	2	4	1	5	1	0	7	6
21ur-11596	16	23	17	19	13	17	13	24
21ur-11597	4	9	7	5	9	20	5	19
21ur-11598	7	17	8	20	42	35	45	99
21ur-11599	70	126	31	105	4	4	7	38
21ur-116	103	248	21	78	48	94	144	239
21ur-1160	801	1294	410	1442	171	248	443	659
21ur-11600	75	92	34	78	18	24	41	66
21ur-11601	2	1	2	2	3	4	1	5
21ur-11602	33	62	25	95	5	9	19	31
21ur-11603	0	0	0	0	0	0	1	0
21ur-11604	21	33	11	41	1	9	7	17
21ur-11605	15	31	4	14	1	5	11	17
21ur-11606	5	11	5	7	22	38	19	25
21ur-11607	11	8	4	9	4	3	8	19
21ur-11608	0	1	0	2	0	1	1	4
21ur-11609	77	110	23	93	3	6	5	14
21ur-1161	132	263	130	149	335	626	368	684
21ur-11610	1	10	4	4	7	8	13	22
21ur-11611	0	0	0	0	1	1	0	0
21ur-11612	58	66	44	57	215	292	129	305
21ur-11613	158	232	66	271	35	35	126	175
21ur-11614	3	10	2	3	1	1	5	8
21ur-11615	0	0	1	1	6	7	11	10
21ur-11616	1	7	3	3	4	5	6	6
21ur-11617	0	1	0	1	1	0	1	0
21ur-11618	0	0	1	1	0	0	1	2
21ur-11619	7	11	0	8	0	0	2	1
21ur-1162	420	658	316	474	688	938	697	1334
21ur-11620	1	2	0	1	5	7	3	6
21ur-11621	5	11	4	13	9	19	13	33
21ur-11622	4	3	3	21	3	18	26	54
21ur-11623	8	20	7	8	7	11	9	15
21ur-11624	9	6	4	7	14	26	21	35
21ur-11625	2	7	3	1	3	3	0	3
21ur-11626	9	76	32	48	4	2	15	37
21ur-11627	7	18	5	11	9	17	6	22
21ur-11628	7	16	6	11	13	19	9	34
21ur-1163	98	208	64	191	10	32	80	143
21ur-11630	66	63	30	78	126	170	152	251
21ur-11631	0	1	1	0	4	2	2	5
21ur-11632	4	4	2	4	21	39	19	28
21ur-11633	12	26	6	52	27	24	83	182
21ur-11634	0	1	0	0	2	0	1	0
21ur-11635	1	3	2	0	2	2	3	3
21ur-11636	0	0	0	1	0	0	2	1
21ur-11637	27	30	15	58	103	76	116	253
21ur-11638	5	5	9	5	24	32	9	38
21ur-11639	20	62	23	31	41	38	31	71
21ur-1164	98	248	85	198	292	320	391	741
21ur-11640	0	0	0	0	0	0	0	0
21ur-11641	0	0	0	0	2	2	1	5
21ur-11642	12	15	4	28	0	2	3	8
21ur-11643	3	4	7	2	20	9	16	37
21ur-11644	0	1	2	1	3	1	6	2
21ur-11645	20	45	10	39	6	8	23	25
21ur-11646	4	8	0	6	1	4	11	10
21ur-11647	14	16	7	22	7	13	11	19
21ur-11648	0	0	0	0	0	2	0	2
21ur-11649	15	26	7	34	0	6	10	9
21ur-1165	0	0	0	0	0	0	0	0
21ur-11650	1	1	0	4	0	0	2	0
21ur-11651	3	5	1	1	3	2	0	0
21ur-11652	3	10	5	7	6	8	15	20
21ur-11653	1	9	4	11	2	3	9	12
21ur-11654	0	0	0	0	0	0	1	3
21ur-11655	0	0	0	1	0	0	0	0
21ur-11656	4	3	4	6	13	3	7	12
21ur-11657	11	15	4	10	1	3	4	15
21ur-11658	0	1	0	0	1	4	0	1
21ur-11659	0	6	2	2	3	3	7	16
21ur-1166	1636	2971	1260	1449	322	463	396	876
21ur-11660	0	2	1	1	3	4	2	2
21ur-11661	2	6	4	6	20	23	19	44
21ur-11662	1	3	1	1	0	0	2	1
21ur-11663	5	12	2	9	1	2	0	12
21ur-11664	4	13	7	20	0	5	3	19
21ur-11665	7	16	6	18	0	5	10	12
21ur-11666	3	5	2	1	0	0	1	0
21ur-11667	18	57	28	23	57	67	54	94
21ur-11668	2	2	1	1	1	0	1	3
21ur-11669	1	7	2	13	2	0	11	23
21ur-1167	105	204	24	62	9	28	79	140
21ur-11670	0	0	0	2	1	0	3	0
21ur-11671	231	619	159	619	10	36	183	205
21ur-11672	0	2	0	0	0	0	0	1
21ur-11673	5	2	1	12	0	0	2	3
21ur-11674	12	22	3	17	0	2	2	6
21ur-11675	4	20	6	7	18	26	10	39
21ur-11676	343	750	250	612	75	110	158	249
21ur-11677	15	34	21	38	6	9	10	18
21ur-11678	4	23	9	24	0	2	9	16
21ur-11679	4	10	4	29	3	7	10	23
21ur-1168	390	734	224	526	100	160	468	676
21ur-11680	6	17	10	10	22	32	24	48
21ur-11681	13	16	2	17	3	2	10	15
21ur-11682	17	40	14	35	5	4	17	27
21ur-11683	1	5	2	2	5	2	3	2
21ur-11684	1	1	0	0	1	1	0	4
21ur-11685	23	48	33	44	60	58	79	217
21ur-11686	24	48	19	39	14	26	46	60
21ur-11687	1	2	2	6	1	3	7	8
21ur-11688	2	0	0	1	0	0	3	5
21ur-11689	2	10	1	4	7	8	4	7
21ur-1169	28	59	32	32	79	75	73	131
21ur-11690	8	13	5	11	20	47	19	46
21ur-11691	3	3	1	5	5	3	2	5
21ur-11692	3	7	1	9	0	0	4	7
21ur-11693	26	38	13	56	16	17	25	52
21ur-11694	5	6	0	3	10	16	11	24
21ur-11695	7	13	10	19	2	2	10	15
21ur-11696	1	4	7	4	4	4	3	19
21ur-11697	88	141	67	104	14	30	15	61
21ur-11698	218	268	101	450	52	62	183	265
21ur-11699	0	2	0	2	0	0	0	0
21ur-117	151	230	73	300	29	43	152	167
21ur-1170	348	531	143	450	49	145	270	452
21ur-11700	7	12	14	10	33	57	25	96
21ur-11701	0	0	0	1	0	0	0	0
21ur-11702	0	0	1	0	1	0	2	1
21ur-11703	43	116	64	96	132	203	115	256
21ur-11704	4	7	1	4	1	4	3	6
21ur-11705	345	514	148	608	73	102	322	423
21ur-11706	0	0	0	0	0	0	0	0
21ur-11707	77	150	21	47	57	91	79	209
21ur-11708	13	37	17	16	0	4	7	23
21ur-11709	159	241	91	251	17	45	82	111
21ur-1171	60	86	25	144	18	36	95	145
21ur-11710	2	1	0	2	4	7	4	6
21ur-11711	79	136	66	65	125	199	115	235
21ur-11712	20	40	10	22	22	23	20	35
21ur-11713	66	174	105	88	227	216	101	272
21ur-11714	106	208	76	201	19	20	29	55
21ur-11715	41	81	45	58	143	147	120	215
21ur-11716	44	94	29	88	3	5	11	29
21ur-11717	29	42	24	72	59	103	83	188
21ur-11718	0	7	0	1	5	2	1	4
21ur-11719	1	3	3	2	9	4	1	2
21ur-1172	14	34	15	20	14	37	21	39
21ur-11720	23	38	7	16	3	3	29	45
21ur-11721	9	13	6	2	11	15	8	26
21ur-11722	0	0	0	0	0	2	0	2
21ur-11723	2	2	0	3	0	0	0	1
21ur-11724	8	13	7	14	18	23	11	27
21ur-11725	45	81	33	47	35	61	19	62
21ur-11726	4	6	6	12	1	0	4	15
21ur-11727	201	264	124	124	156	358	133	394
21ur-11728	3	4	3	5	0	4	3	5
21ur-11729	0	1	1	1	1	0	0	1
21ur-1173	730	1465	656	1153	772	1273	852	1714
21ur-11730	7	22	7	8	17	34	20	24
21ur-11731	291	505	229	360	176	247	190	495
21ur-11732	0	0	0	0	0	1	0	0
21ur-11733	3	7	0	0	9	3	6	21
21ur-11734	16	46	26	24	49	101	67	172
21ur-11735	0	0	0	0	0	0	0	0
21ur-11736	2	4	3	3	1	7	5	3
21ur-11737	2	1	0	4	0	0	2	1
21ur-11738	1	3	0	0	2	1	9	3
21ur-11739	3	9	7	7	1	0	0	4
21ur-1174	330	408	296	239	83	170	57	229
21ur-11740	17	48	6	25	3	10	23	40
21ur-11741	26	38	15	33	29	37	36	55
21ur-11742	1	1	0	1	0	1	0	0
21ur-11743	0	14	0	2	5	16	8	26
21ur-11744	47	85	28	51	8	11	13	36
21ur-11745	9	18	6	18	0	3	2	13
21ur-11746	7	9	0	14	1	2	7	17
21ur-11747	1	5	5	3	5	15	6	8
21ur-11748	5	12	4	7	5	9	11	14
21ur-11749	49	83	14	78	4	7	13	34
21ur-1175	501	733	312	720	653	979	726	1174
21ur-11750	22	38	20	35	5	8	8	14
21ur-11751	11	41	10	27	4	11	27	38
21ur-11752	14	37	11	55	8	5	20	38
21ur-11753	9	12	4	16	5	8	15	24
21ur-11754	29	68	28	36	55	93	46	138
21ur-11755	1	3	5	5	3	10	8	13
21ur-11756	21	41	20	70	1	7	12	42
21ur-11757	2	9	5	3	6	12	6	16
21ur-11758	0	5	1	1	2	0	2	2
21ur-11759	1	11	2	11	1	0	3	10
21ur-1176	0	0	0	2	0	2	1	0
21ur-11760	22	32	22	20	99	77	89	198
21ur-11761	4	3	2	14	2	2	19	18
21ur-11762	69	148	99	174	88	208	80	259
21ur-11763	11	16	9	7	9	15	21	32
21ur-11764	18	32	11	29	11	9	19	25
21ur-11765	0	7	2	2	6	10	7	15
21ur-11766	13	40	15	17	32	57	40	83
21ur-11767	11	14	7	20	0	3	13	5
21ur-11768	2	3	0	6	0	1	3	1
21ur-11769	1	2	0	1	0	4	2	2
21ur-1177	298	564	153	527	90	146	330	460
21ur-11770	3	7	1	1	0	4	1	3
21ur-11771	19	46	22	24	30	33	34	68
21ur-11772	3	3	0	7	0	0	1	1
21ur-11773	89	220	93	273	9	26	27	82
21ur-11774	55	161	42	172	14	22	72	102
21ur-11775	103	240	98	168	66	130	112	212
21ur-11776	18	54	20	29	31	26	23	75
21ur-11777	122	366	145	188	80	95	57	217
21ur-11778	0	0	0	1	3	2	1	1
21ur-11779	208	369	149	317	42	45	61	268
21ur-1178	528	1044	578	578	1989	3163	2091	5139
21ur-11780	3	20	11	6	32	31	30	43
21ur-11781	5	21	6	25	0	0	3	10
21ur-11782	229	278	85	312	42	28	146	279
21ur-11783	37	69	35	25	45	56	37	83
21ur-11784	0	1	0	2	2	4	6	5
21ur-11785	25	38	11	40	5	14	28	36
21ur-11786	52	93	62	73	187	246	220	487
21ur-11787	0	0	0	0	0	0	0	0
21ur-11788	0	0	0	0	0	0	0	0
21ur-11789	0	0	0	0	0	0	0	0
21ur-1179	77	170	85	82	140	219	101	249
21ur-11790	0	1	0	0	0	0	1	0
21ur-11791	0	3	2	0	3	2	2	3
21ur-11792	0	1	1	0	0	1	1	3
21ur-11793	0	0	0	0	1	0	0	0
21ur-11794	0	0	0	0	0	0	0	0
21ur-11795	0	1	0	0	1	5	1	0
21ur-11797	13	26	22	15	65	96	61	77
21ur-11798	0	0	0	0	0	0	0	0
21ur-11799	0	2	1	1	0	0	1	4
21ur-118	626	1261	383	1041	424	627	450	910
21ur-1180	157	310	111	264	132	293	185	386
21ur-11800	4	9	2	2	14	22	26	26
21ur-11801	0	3	0	0	0	0	2	0
21ur-11802	0	1	1	0	2	1	3	8
21ur-11803	0	0	0	0	0	0	0	0
21ur-11804	3	10	10	8	26	30	40	50
21ur-11805	1	1	3	6	0	0	2	1
21ur-11806	0	0	0	0	0	0	1	0
21ur-11807	0	0	0	0	0	1	0	0
21ur-11808	0	1	1	0	0	1	0	0
21ur-11809	0	0	0	0	1	0	0	0
21ur-1181	141	330	137	122	707	1102	427	839
21ur-11810	252	661	263	309	146	131	97	577
21ur-11811	0	4	0	1	0	3	0	0
21ur-11812	53	107	37	117	5	22	27	59
21ur-11813	1	1	3	2	3	1	2	2
21ur-11814	36	62	18	62	2	10	13	26
21ur-11815	1	5	0	0	0	2	0	0
21ur-11816	1	0	1	1	2	0	3	1
21ur-11817	0	1	1	0	5	3	5	3
21ur-11818	8	15	2	3	2	15	16	8
21ur-11819	8	19	13	10	23	31	12	41
21ur-1182	197	499	188	365	454	746	604	1494
21ur-11820	12	26	9	12	32	65	29	67
21ur-11822	170	307	146	129	212	459	182	422
21ur-11823	103	202	38	166	26	61	65	118
21ur-11824	15	41	12	32	43	70	73	113
21ur-11825	43	114	64	63	43	121	64	142
21ur-11826	2	1	0	0	2	1	0	3
21ur-11827	0	0	0	0	0	0	0	0
21ur-11828	19	42	14	39	30	63	76	172
21ur-11829	144	631	252	318	121	218	145	356
21ur-1183	103	187	96	108	176	340	183	460
21ur-11830	17	35	20	18	34	59	37	63
21ur-11831	6	22	9	16	2	4	8	9
21ur-11832	37	78	43	38	30	72	43	129
21ur-11833	48	56	30	34	9	20	11	46
21ur-11834	0	2	1	2	7	14	10	29
21ur-11835	43	79	28	68	21	41	45	67
21ur-11836	2	8	4	4	20	20	23	37
21ur-11837	66	177	56	149	15	22	45	66
21ur-11838	12	54	14	55	8	16	11	39
21ur-11839	0	1	0	2	0	0	0	0
21ur-1184	208	400	184	250	879	1148	1187	1890
21ur-11840	0	0	0	0	0	0	0	1
21ur-11841	1	2	2	4	3	3	6	12
21ur-11842	2	9	4	5	0	0	0	3
21ur-11843	20	45	13	27	2	4	5	20
21ur-11844	53	144	75	81	56	112	65	139
21ur-11845	1	2	0	0	0	1	0	0
21ur-11846	34	104	30	42	6	21	21	50
21ur-11847	20	45	22	15	50	115	44	47
21ur-11848	18	52	25	28	65	96	54	127
21ur-1185	509	962	336	632	343	604	436	815
21ur-11850	0	1	2	0	0	1	0	0
21ur-11851	27	44	13	69	2	15	38	50
[truncated: 13,364 more rows]
