# Supplementary material for: Widespread destabilization of C. elegans microRNAs by the E3 ubiquitin ligase EBAX-1
Source: bioRxiv preprint, doi:10.1101/2024.06.28.601170, version 1 (2024-06-29)
Supplement: Supplemental Table 3 [file 601170_file06.xlsx]

## Sheet: Sheet1
Gene_ID	N2	ebax-1	Gene_start	Chr
WBGene00010957	5237	3307	113	MtDNA
WBGene00010958	246	159	549	MtDNA
WBGene00008352	428	250	1219	III
WBGene00010959	43209	30780	1763	MtDNA
WBGene00007063	335	286	1848	II
WBGene00010960	12946	8165	2634	MtDNA
WBGene00010961	236	76	3389	MtDNA
WBGene00022277	805	551	4116	I
WBGene00000829	108432	66892	4504	MtDNA
WBGene00010962	171176	106914	5678	MtDNA
WBGene00010963	27315	16240	6506	MtDNA
WBGene00002061	3818	1803	6584	V
WBGene00010964	332821	199023	7827	MtDNA
WBGene00010965	40394	29071	9649	MtDNA
WBGene00010966	906	329	11356	MtDNA
WBGene00022276	2954	1955	11495	I
WBGene00010967	19383	9145	11691	MtDNA
WBGene00003670	818	450	11985	III
WBGene00015286	561	225	12985	II
WBGene00019182	316	179	15772	III
WBGene00022278	1958	1104	17484	I
WBGene00015285	470	290	19538	II
WBGene00019185	182	74	20531	III
WBGene00001177	2093	1280	20818	V
WBGene00005017	1425	602	23325	II
WBGene00015291	1376	1015	24666	II
WBGene00017745	537	303	25374	II
WBGene00022279	855	433	27589	I
WBGene00017746	1539	1186	30061	II
WBGene00017744	109	108	31719	II
WBGene00017747	327	207	35202	II
WBGene00017748	317	214	38558	II
WBGene00017750	499	397	41471	II
WBGene00004504	2501	1282	42207	II
WBGene00022203	777	450	42632	X
WBGene00017742	1026	740	43907	II
WBGene00017749	1756	1020	45040	II
WBGene00044345	694	438	47461	I
WBGene00016021	1287	882	47580	II
WBGene00021677	1300	932	49921	I
WBGene00016020	3319	2204	51652	II
WBGene00006611	206	134	52997	II
WBGene00021678	168	109	55293	I
WBGene00016019	1272	757	57670	II
WBGene00016018	1246	733	61313	II
WBGene00021043	5633	2517	62888	III
WBGene00005014	1066	659	69073	III
WBGene00001193	312	210	69654	II
WBGene00018794	1096	639	69850	III
WBGene00000812	1389	947	71425	I
WBGene00016022	276	157	71672	II
WBGene00021683	689	433	81193	I
WBGene00021679	119	86	83992	I
WBGene00018795	386	265	86677	III
WBGene00018793	744	456	87559	III
WBGene00016812	940	665	88529	II
WBGene00003931	292	162	89453	III
WBGene00021682	413	303	91404	I
WBGene00006599	802	413	91980	IV
WBGene00016810	1161	732	92169	II
WBGene00021676	624	367	93022	I
WBGene00022206	342	224	95614	X
WBGene00016811	1272	865	95669	II
WBGene00021681	2354	1415	96459	I
WBGene00016808	1554	971	98404	II
WBGene00004496	11404	5333	103394	V
WBGene00018975	356	208	104825	V
WBGene00004274	5117	3120	108682	I
WBGene00004418	47657	22223	111038	I
WBGene00016805	214	122	111567	II
WBGene00018773	199	89	113807	I
WBGene00019615	833	622	114428	II
WBGene00004962	232	101	118093	I
WBGene00000480	2479	1578	118202	V
WBGene00017928	1159	595	119256	IV
WBGene00016219	178	253	120435	III
WBGene00017929	1405	924	121797	IV
WBGene00020999	1729	875	124010	V
WBGene00016218	263	265	124778	III
WBGene00017926	1770	694	126731	IV
WBGene00021000	293	213	127000	V
WBGene00003229	4502	2617	127285	I
WBGene00021004	2840	1882	128237	V
WBGene00016217	226	127	130947	III
WBGene00000857	266	216	130983	II
WBGene00000897	647	375	132416	IV
WBGene00016216	122	90	132418	III
WBGene00020540	165	163	134494	III
WBGene00000253	870	606	145968	I
WBGene00020798	1257	787	147233	II
WBGene00021002	117	69	147521	V
WBGene00006895	582	136	148087	III
WBGene00022211	141	115	150363	X
WBGene00020797	117	93	152583	II
WBGene00020796	2129	1373	154881	II
WBGene00006648	703	441	156819	V
WBGene00021398	685	397	158962	IV
WBGene00004225	151	100	160172	I
WBGene00001340	1874	1024	162374	II
WBGene00022434	1608	1128	166987	V
WBGene00018958	415	216	171223	I
WBGene00020149	388	190	176997	II
WBGene00000838	3637	2055	177417	V
WBGene00018957	510	303	178524	I
WBGene00006561	251	156	179083	IV
WBGene00018241	256	153	181263	III
WBGene00018955	383	276	182068	I
WBGene00000227	1344	1004	183364	I
WBGene00021395	731	475	184484	IV
WBGene00044689	4252	2722	186167	V
WBGene00003510	959	563	186949	III
WBGene00006715	926	483	188838	III
WBGene00018239	624	431	192103	III
WBGene00021402	928	566	192256	IV
WBGene00185078	449	229	194460	III
WBGene00000815	2644	1724	194742	IV
WBGene00000497	220	159	196985	II
WBGene00077643	170	104	201600	V
WBGene00044736	159	109	203602	IV
WBGene00017080	678	461	204382	V
WBGene00195063	934	724	205298	IV
WBGene00021394	1421	924	208185	IV
WBGene00002230	277	211	209992	III
WBGene00017082	118	82	210145	V
WBGene00018585	741	444	213169	II
WBGene00018586	3479	1934	217049	II
WBGene00021401	661	332	218552	IV
WBGene00021545	2196	1568	222700	II
WBGene00019821	1633	1064	225439	IV
WBGene00019822	2274	1583	232473	IV
WBGene00021546	990	651	233139	II
WBGene00021754	1695	1027	235844	III
WBGene00019823	909	537	237591	IV
WBGene00019820	1836	1232	240451	IV
WBGene00004166	3967	2464	240705	II
WBGene00019818	531	335	241326	V
WBGene00019819	1126	771	245143	IV
WBGene00019824	4032	3049	253619	IV
WBGene00021675	565	288	254254	I
WBGene00021753	1690	1146	254535	III
WBGene00019816	186	147	254838	V
WBGene00019825	1133	708	255966	IV
WBGene00001071	338	182	257403	IV
WBGene00020647	1255	824	259989	IV
WBGene00003932	620	456	261886	IV
WBGene00044640	315	75	264353	II
WBGene00021752	764	482	265090	III
WBGene00015188	286	195	266037	II
WBGene00020651	282	205	266448	IV
WBGene00020649	2235	1622	274420	IV
WBGene00015189	540	312	276212	II
WBGene00015194	1464	1047	278621	II
WBGene00206487	365	329	283647	IV
WBGene00015191	929	543	283887	II
WBGene00021757	911	632	284117	III
WBGene00016905	376	225	286040	I
WBGene00015186	2549	1222	286625	II
WBGene00015185	1660	986	288939	II
WBGene00015184	764	452	290582	II
WBGene00016902	419	237	291215	I
WBGene00019298	3532	2231	292423	IV
WBGene00021751	297	157	292640	III
WBGene00000081	5419	3161	295654	III
WBGene00018010	1098	587	297947	V
WBGene00018011	2017	1211	300021	V
WBGene00019280	695	390	301273	II
WBGene00020082	2615	1659	301830	X
WBGene00018013	982	572	304810	V
WBGene00016906	416	180	305811	I
WBGene00019300	374	184	307505	IV
WBGene00002077	7896	4166	310981	I
WBGene00001099	2061	1066	315056	IV
WBGene00021758	425	299	315460	III
WBGene00002079	2897	1623	318549	I
WBGene00001391	1740	633	319789	II
WBGene00019284	386	303	321442	II
WBGene00000022	789	445	323777	V
WBGene00021660	1204	635	323855	I
WBGene00017578	602	333	325059	IV
WBGene00000675	2679	9483	325435	IV
WBGene00019733	656	469	326111	X
WBGene00019285	274	175	328564	II
WBGene00000917	614	387	332604	I
WBGene00021756	1137	802	333618	III
WBGene00015430	235	147	334567	X
WBGene00017574	635	263	334796	IV
WBGene00017576	246	168	339808	IV
WBGene00017037	980	670	341716	II
WBGene00021661	686	389	343069	I
WBGene00020707	198	83	343428	V
WBGene00001561	2940	2038	344306	III
WBGene00021658	644	391	347469	I
WBGene00021657	630	385	348460	I
WBGene00020706	1503	1004	349385	V
WBGene00015429	344	270	353619	X
WBGene00022048	10403	6577	359223	IV
WBGene00020705	1374	853	359766	V
WBGene00020091	2027	1128	364510	I
WBGene00004045	167	92	365949	III
WBGene00020088	600	304	368270	I
WBGene00019862	815	640	372235	X
WBGene00020089	975	520	373571	I
WBGene00019863	376	207	377174	X
WBGene00019636	336	343	378137	III
WBGene00004143	15888	9304	379071	I
WBGene00004981	1386	881	379885	IV
WBGene00002060	672	415	381385	X
WBGene00015407	281	170	382309	II
WBGene00006385	1389	900	382826	I
WBGene00020295	119	87	383699	IV
WBGene00019864	527	386	384385	X
WBGene00022642	11451	7973	385746	V
WBGene00004493	51762	25547	385887	IV
WBGene00015405	1755	984	386088	II
WBGene00044789	1210	584	386699	IV
WBGene00020300	827	523	388084	IV
WBGene00020090	281	198	388470	I
WBGene00001338	1036	647	388686	IV
WBGene00015404	1340	838	388833	II
WBGene00195183	269	151	389516	X
WBGene00020298	1680	1070	390560	IV
WBGene00045249	948	561	393156	IV
WBGene00020297	10684	4823	393880	IV
WBGene00020296	1716	1150	396545	IV
WBGene00021733	1108	603	398891	I
WBGene00021909	592	309	402384	III
WBGene00015403	591	374	402678	II
WBGene00002187	959	692	405621	IV
WBGene00016074	1093	726	406137	II
WBGene00022858	1287	980	406457	X
WBGene00021910	2224	1432	408126	III
WBGene00020299	225	119	410867	IV
WBGene00016073	1836	965	411222	II
WBGene00022644	467	1674	411782	V
WBGene00001332	1676	1200	415635	IV
WBGene00022645	284	925	415870	V
WBGene00000913	15152	10728	420011	IV
WBGene00000608	16667	15026	421707	X
WBGene00022046	1650	946	426168	IV
WBGene00022861	277	210	427035	X
WBGene00022047	869	366	428070	IV
WBGene00002041	2673	2080	429209	IV
WBGene00021913	140	170	429338	III
WBGene00021912	399	198	434891	III
WBGene00022045	365	195	443985	IV
WBGene00006593	1180	698	444003	I
WBGene00022044	1379	953	445677	IV
WBGene00019744	119	186	449981	V
WBGene00004127	267	95	450446	X
WBGene00185079	556	385	456083	II
WBGene00021131	199	148	458766	II
WBGene00019743	127	151	459795	V
WBGene00018682	1228	819	460651	X
WBGene00019774	121	115	461199	IV
WBGene00021132	1001	640	461667	II
WBGene00021026	1633	983	461995	I
WBGene00019742	191	103	462588	V
WBGene00021914	494	286	463925	III
WBGene00021133	562	309	468374	II
WBGene00021073	2194	1010	471262	II
WBGene00017328	3527	2087	472317	III
WBGene00003689	530	212	474778	V
WBGene00003134	992	541	475454	III
WBGene00003645	192	103	478162	V
WBGene00021074	713	383	480721	II
WBGene00003720	518	216	480814	V
WBGene00020153	196	150	484857	V
WBGene00004188	1547	965	484866	II
WBGene00021024	1175	667	488607	I
WBGene00003696	306	135	489620	V
WBGene00001814	1606	689	489969	I
WBGene00006781	1760	1195	491547	III
WBGene00015137	223	148	493228	X
WBGene00003721	218	115	494370	V
WBGene00022035	342	230	496144	I
WBGene00022036	776	449	502891	I
WBGene00017937	454	259	505241	III
WBGene00022034	2359	1327	506473	I
WBGene00021012	1336	722	506731	IV
WBGene00015139	178	101	510673	X
WBGene00022037	5971	3754	511044	I
WBGene00000213	3428	978	520214	IV
WBGene00020016	1617	504	521595	V
WBGene00020837	812	266	522602	II
WBGene00015141	978	593	525928	X
WBGene00020836	225	183	526574	II
WBGene00020834	171	219	530844	II
WBGene00022033	396	212	530969	I
WBGene00017898	150	96	531841	X
WBGene00003648	406	124	532259	V
WBGene00003722	173	107	534446	V
WBGene00022043	1350	909	534455	I
WBGene00022042	12610	6509	535791	I
WBGene00015759	350	2446	536628	V
WBGene00007009	3926	2314	537122	I
WBGene00020701	217	104	542066	III
WBGene00015646	849	299	546705	II
WBGene00019014	436	257	549355	X
WBGene00004235	697	436	550696	I
WBGene00015155	132	87	555950	III
WBGene00015644	486	343	556485	II
WBGene00001165	206	198	559234	IV
WBGene00022040	662	442	562736	I
WBGene00015756	1455	870	563134	V
WBGene00003408	226	192	563711	X
WBGene00018925	1117	471	568368	IV
WBGene00021095	495	258	569210	II
WBGene00001725	339	431	572173	I
WBGene00001579	737	424	572769	IV
WBGene00003407	1232	912	576312	X
WBGene00021904	507	298	576960	III
WBGene00021905	631	393	577684	III
WBGene00021097	1879	1002	577837	II
WBGene00018926	280	154	580246	IV
WBGene00021093	1282	843	580602	II
WBGene00002040	318	213	585807	I
WBGene00021906	997	567	587179	III
WBGene00015994	217	121	593329	IV
WBGene00017423	477	383	593960	X
WBGene00003599	526	370	595202	II
WBGene00002269	2922	2283	599510	III
WBGene00021908	144	71	604003	III
WBGene00017426	328	243	604872	X
WBGene00020566	237	172	606004	III
WBGene00020559	218	85	606925	III
WBGene00003680	512	322	610512	V
WBGene00006825	665	440	611120	X
WBGene00018923	1384	919	614651	I
WBGene00020207	401	366	614770	II
WBGene00020560	174	84	615422	III
WBGene00020562	637	524	618246	III
WBGene00018615	123	78	619453	V
WBGene00015497	272	326	627537	IV
WBGene00022029	1392	767	629465	I
WBGene00001412	1241	712	632019	III
WBGene00021063	1422	699	636486	III
WBGene00022027	3376	1848	636804	I
WBGene00022026	174	115	638129	I
WBGene00044319	235	138	638528	III
WBGene00018622	150	72	640749	V
WBGene00044318	792	487	640790	III
WBGene00019498	399	244	640991	II
WBGene00021061	1929	1165	642059	III
WBGene00002056	4622	1820	642156	X
WBGene00015648	424	304	646754	III
WBGene00019658	273	169	652130	IV
WBGene00004427	22603	10744	653480	IV
WBGene00022025	2281	1576	654090	I
WBGene00019664	1021	536	655390	IV
WBGene00020572	183	90	658477	X
WBGene00019495	1233	483	658669	II
WBGene00015647	317	288	658709	III
WBGene00022031	606	346	659565	I
WBGene00022032	130	68	664387	I
WBGene00019663	185	82	665525	IV
WBGene00017961	273	107	665919	V
WBGene00020574	190	140	669684	X
WBGene00020569	287	129	672107	X
WBGene00021215	192	149	673165	I
WBGene00017962	117	355	674886	V
WBGene00001709	315	195	676122	III
WBGene00017957	685	279	684060	V
WBGene00018256	118	115	684497	IV
WBGene00019244	595	367	687684	V
WBGene00021207	166	80	688257	I
WBGene00017184	642	614	691913	X
WBGene00021210	708	422	692020	I
WBGene00016030	335	234	692509	III
WBGene00021208	963	701	694976	I
WBGene00021709	854	615	696524	V
WBGene00021950	189	111	698699	IV
WBGene00021209	928	582	700278	I
WBGene00020181	2402	1285	700482	II
WBGene00020172	846	547	702107	II
WBGene00020171	838	454	709381	II
WBGene00004028	593	329	719929	I
WBGene00004829	936	690	720237	X
WBGene00021456	1722	915	723788	II
WBGene00001564	61383	32805	724332	V
WBGene00016028	334	139	725119	III
WBGene00003936	740	470	727207	III
WBGene00005228	209	90	728301	V
WBGene00020550	263	161	740682	III
WBGene00004926	223	108	745418	II
WBGene00000086	523	276	751203	X
WBGene00005642	221	250	753283	V
WBGene00020551	284	211	755262	III
WBGene00020282	115	71	760848	I
WBGene00000677	4629	3126	762413	IV
WBGene00005643	434	637	762640	V
WBGene00020283	152	89	763478	I
WBGene00018928	185	123	764061	IV
WBGene00004212	269	169	765184	III
WBGene00020216	1202	662	767023	X
WBGene00002071	748	480	768596	X
WBGene00020218	2896	1865	770837	X
WBGene00020215	137	130	772476	X
WBGene00018932	1014	582	773237	IV
WBGene00000882	606	397	773414	III
WBGene00019983	1865	1054	773518	V
WBGene00000117	1614	916	774321	III
WBGene00018364	2077	1326	778212	III
WBGene00018931	230	152	778784	IV
WBGene00018362	5708	3611	783703	III
WBGene00004922	591	256	786070	III
WBGene00004824	582	339	786234	IV
WBGene00018930	233	116	788055	IV
WBGene00020214	618	423	788353	X
WBGene00004498	2729	1132	794300	III
WBGene00018935	650	397	794632	IV
WBGene00015173	2115	1286	795136	III
WBGene00018934	2621	1734	795755	IV
WBGene00001154	1202	746	797023	IV
WBGene00021935	667	440	800818	IV
WBGene00022518	831	516	803368	I
WBGene00185088	143	96	805102	IV
WBGene00017780	657	744	806991	X
WBGene00021936	1789	1055	807398	IV
WBGene00020058	141	85	810812	V
WBGene00017781	244	262	811173	X
WBGene00000903	160	116	811844	III
WBGene00002058	207	274	813854	X
WBGene00000895	216	112	816145	III
WBGene00000899	656	438	817922	X
WBGene00019328	277	170	823222	III
WBGene00019329	773	570	828590	III
WBGene00021942	116	80	830358	IV
WBGene00019327	8569	4371	832982	III
WBGene00018212	314	232	834778	X
WBGene00021943	465	262	835033	IV
WBGene00019561	180	128	835757	V
WBGene00022517	385	182	837996	I
WBGene00018214	561	361	838144	X
WBGene00019332	1142	830	840458	III
WBGene00022519	310	174	841742	I
WBGene00001392	3389	1459	842930	III
WBGene00018215	198	129	845731	X
WBGene00019326	2260	1246	845841	III
WBGene00017874	1642	1530	846864	II
WBGene00021945	632	408	849269	IV
WBGene00019333	1986	1227	851331	III
WBGene00004388	1111	726	852801	III
WBGene00019563	938	165	853436	V
WBGene00022388	1729	1032	853451	I
WBGene00006430	660	444	854221	III
WBGene00044757	195	98	855219	IV
WBGene00019334	2137	1433	856560	III
WBGene00021939	240	171	858930	IV
WBGene00018985	210	142	859615	X
WBGene00000202	1098	690	860198	III
WBGene00018986	956	309	862267	X
WBGene00021170	1336	854	862306	III
WBGene00018987	436	424	864097	X
WBGene00020155	3460	1569	865074	V
WBGene00021576	186	241	868814	II
WBGene00020156	1810	390	869482	V
WBGene00018984	2263	1524	872603	X
WBGene00022389	467	266	872755	I
WBGene00000106	486	331	873212	II
WBGene00021938	1432	937	874791	IV
WBGene00022502	268	213	877239	X
WBGene00020761	1156	734	877435	III
WBGene00020757	1250	536	879860	III
WBGene00020762	3672	2247	881443	III
WBGene00022386	505	268	882918	I
WBGene00007007	1847	874	885344	IV
WBGene00020307	183	100	888309	II
WBGene00022390	219	127	889767	I
WBGene00020763	1576	1156	891326	III
WBGene00017758	895	562	895747	III
WBGene00001678	907	513	897286	I
WBGene00020311	700	366	898043	II
WBGene00001480	275	206	899304	V
WBGene00017759	2059	1040	900138	III
WBGene00017760	1772	1102	902287	III
WBGene00020304	116	93	904425	II
WBGene00019241	1057	641	904963	V
WBGene00022385	134	73	907448	I
WBGene00017763	1070	578	908330	III
WBGene00000263	3204	1711	909957	III
WBGene00017757	1631	1051	911261	III
WBGene00019240	2074	1186	911774	V
WBGene00022391	117	80	912332	I
WBGene00004769	263	214	915867	X
WBGene00018077	303	160	918397	X
WBGene00003969	372	405	919526	III
WBGene00018076	363	264	920197	X
WBGene00018075	665	534	924958	X
WBGene00020453	358	198	933422	III
WBGene00018779	547	179	938543	X
WBGene00021748	906	566	939391	V
WBGene00020455	127	250	939941	III
WBGene00019068	1201	387	940017	IV
WBGene00019918	128	106	940983	II
WBGene00020456	1184	1102	944733	III
WBGene00004893	111	78	944826	X
WBGene00016303	335	287	946485	II
WBGene00021750	478	377	946723	V
WBGene00020457	231	187	948493	III
WBGene00003238	736	423	948569	I
WBGene00005024	1367	884	950306	V
WBGene00000195	393	227	950782	X
WBGene00050914	332	151	954291	III
WBGene00000164	411	260	954975	X
WBGene00016642	705	504	957881	X
WBGene00004047	1458	796	959521	IV
WBGene00020448	149	139	962269	III
WBGene00019912	234	184	966654	III
WBGene00018788	141	103	969088	I
WBGene00016643	579	339	970583	X
WBGene00019913	132	89	973309	III
WBGene00016644	803	182	975525	X
WBGene00016641	210	184	980776	X
WBGene00006770	1110	681	982706	V
WBGene00019915	291	170	983261	III
WBGene00000958	363	201	983903	X
WBGene00043705	209	115	984384	IV
WBGene00018786	196	131	989671	I
WBGene00018455	138	106	991600	II
WBGene00006615	193	112	991881	III
WBGene00021749	881	439	996886	V
WBGene00021923	221	167	999214	IV
WBGene00019914	5135	2828	1002707	III
WBGene00021925	301	172	1003595	IV
WBGene00021926	1311	863	1006083	IV
WBGene00019971	4008	2502	1008803	V
WBGene00021337	310	277	1010037	III
WBGene00021922	1005	626	1010512	IV
WBGene00016930	558	307	1011371	I
WBGene00021921	1307	838	1012624	IV
WBGene00005002	2929	1356	1016405	I
WBGene00019972	173	80	1018336	V
WBGene00021335	186	331	1018843	I
WBGene00021327	1501	770	1019827	I
WBGene00021336	738	361	1020954	III
WBGene00019973	113	130	1023780	V
WBGene00021340	470	293	1026462	III
WBGene00018857	724	473	1027668	X
WBGene00017153	297	158	1028773	III
WBGene00019699	291	201	1028972	II
WBGene00004952	1537	813	1030633	I
WBGene00015267	935	559	1031318	III
WBGene00021329	838	593	1034443	I
WBGene00018853	243	178	1035548	X
WBGene00015266	278	173	1037492	III
WBGene00018860	507	394	1038514	X
WBGene00021928	194	155	1038667	IV
WBGene00021332	1011	681	1041472	I
WBGene00015344	1796	1100	1042691	V
WBGene00021331	438	242	1049596	I
WBGene00021333	114	68	1050651	I
WBGene00021929	663	386	1052524	IV
WBGene00021334	1569	897	1053894	I
WBGene00003565	142	111	1054081	X
WBGene00021930	1273	637	1055023	IV
WBGene00021920	737	375	1056892	IV
WBGene00006741	172	122	1057487	X
WBGene00019624	459	351	1061595	V
WBGene00006697	1383	815	1062794	III
WBGene00019626	164	76	1065682	V
WBGene00001745	427	187	1068484	I
WBGene00002988	248	132	1072452	X
WBGene00000816	1411	820	1077463	IV
WBGene00004277	947	582	1078138	III
WBGene00003991	138	127	1079430	X
WBGene00022357	878	515	1080901	III
WBGene00003917	834	531	1081401	III
WBGene00019365	590	387	1084217	X
WBGene00021934	2828	1464	1087108	IV
WBGene00004902	352	147	1092006	II
WBGene00021743	217	262	1092659	V
WBGene00021933	775	446	1094541	IV
WBGene00004377	475	303	1097152	X
WBGene00021932	311	173	1097453	IV
WBGene00020471	828	800	1097927	II
WBGene00019030	237	200	1103208	III
WBGene00002062	209	127	1104212	X
WBGene00000617	598	75	1104942	II
WBGene00003893	3990	3410	1107396	IV
WBGene00015472	241	241	1111903	X
WBGene00020475	576	343	1121013	II
WBGene00016638	16209	8512	1121494	IV
WBGene00015476	983	697	1122421	X
WBGene00021103	920	649	1123534	II
WBGene00015471	452	301	1125615	X
WBGene00016636	11630	7045	1126790	IV
WBGene00006387	549	371	1127976	II
WBGene00004927	550	350	1128986	X
WBGene00021072	290	177	1130112	V
WBGene00021104	500	255	1132287	II
WBGene00000785	9701	3931	1132598	V
WBGene00020128	418	174	1132993	X
WBGene00021070	301	106	1134602	V
WBGene00021689	1129	712	1136366	I
WBGene00004076	12820	4054	1136785	II
WBGene00004891	1314	792	1143172	III
WBGene00022103	641	246	1152044	III
WBGene00000165	1469	879	1154514	I
WBGene00000552	2779	1459	1156271	V
WBGene00004429	44453	22710	1156579	I
WBGene00021687	266	220	1157571	I
WBGene00020490	167	102	1162207	X
WBGene00001816	515	324	1162880	I
WBGene00020740	320	156	1163575	II
WBGene00004230	134	74	1165711	V
WBGene00016796	573	320	1170708	IV
WBGene00004880	1397	841	1176473	I
WBGene00020662	18601	10929	1176724	V
WBGene00022426	1194	742	1178022	IV
WBGene00022490	993	428	1182056	III
WBGene00022428	305	177	1182592	IV
WBGene00021738	549	344	1184876	V
WBGene00022491	1276	717	1185248	III
WBGene00007020	720	463	1187802	IV
WBGene00020491	599	364	1188433	X
WBGene00022427	1466	848	1193065	IV
WBGene00021686	2339	1547	1193158	I
WBGene00022492	793	478	1194386	III
WBGene00021736	397	245	1196072	V
WBGene00022493	1825	1078	1196389	III
WBGene00018734	539	323	1197374	II
WBGene00022489	942	639	1202546	III
WBGene00001104	146	110	1202651	IV
WBGene00021735	2010	1475	1207889	V
WBGene00022488	768	453	1208133	III
WBGene00021685	1428	829	1211485	I
WBGene00016725	248	196	1211760	X
WBGene00022497	2561	2000	1215000	III
WBGene00003978	961	417	1215995	III
WBGene00016539	460	386	1223897	V
WBGene00021691	1403	820	1223948	I
WBGene00021121	421	340	1229080	IV
WBGene00009521	1489	839	1232825	IV
WBGene00018572	579	246	1233236	II
WBGene00022487	172	141	1236015	III
WBGene00022486	107	94	1239048	III
WBGene00009522	260	158	1244389	IV
WBGene00009523	174	69	1245171	IV
WBGene00006635	267	143	1246017	X
WBGene00044675	123	79	1247618	III
WBGene00009518	1950	1504	1249192	IV
WBGene00021692	339	257	1254770	I
WBGene00018575	162	98	1255937	II
WBGene00001707	605	275	1258201	I
WBGene00009526	112	450	1261324	IV
WBGene00004266	3131	1829	1262629	V
WBGene00016540	297	151	1264773	V
WBGene00009515	205	86	1266866	IV
WBGene00013839	153	114	1267299	III
WBGene00013836	122	108	1271993	III
WBGene00016874	800	318	1272788	X
WBGene00021968	151	66	1273169	II
WBGene00007476	422	308	1274868	IV
WBGene00004053	1732	1114	1276415	V
WBGene00021969	624	374	1281972	II
WBGene00001171	145	68	1289373	V
WBGene00022425	1364	818	1289627	IV
WBGene00018776	2534	1881	1297222	IV
WBGene00016871	152	111	1300149	X
WBGene00021973	740	409	1302499	II
WBGene00003400	1094	589	1305562	I
WBGene00022329	109	115	1305716	III
WBGene00000112	800	417	1306240	II
WBGene00018778	3438	2243	1310166	IV
WBGene00018974	2438	1416	1310515	II
WBGene00019272	1124	494	1311391	X
WBGene00022330	283	132	1313297	III
WBGene00044774	217	124	1315643	V
WBGene00006924	23817	12823	1321037	II
WBGene00003965	252	170	1321344	X
WBGene00022326	715	183	1322124	III
WBGene00002176	191	111	1326989	II
WBGene00018777	485	300	1329162	IV
WBGene00017667	1346	776	1335364	X
WBGene00045052	225	137	1337016	I
WBGene00004888	3341	2415	1340678	I
WBGene00019673	1865	951	1341272	I
WBGene00004338	686	368	1347314	IV
WBGene00022363	1133	594	1348503	I
WBGene00015728	221	91	1350656	II
WBGene00022284	263	145	1352126	V
WBGene00000678	721	406	1353636	IV
WBGene00015729	113	70	1357178	II
WBGene00004923	163	92	1358178	V
WBGene00022366	1857	986	1365303	I
WBGene00018819	754	463	1368102	II
WBGene00022286	1821	1069	1373120	V
WBGene00022365	218	148	1383462	I
WBGene00022423	446	171	1386215	IV
WBGene00022367	124	76	1389248	I
WBGene00022346	546	241	1390450	III
WBGene00022287	174	132	1391154	V
WBGene00022372	789	470	1393046	I
WBGene00004925	410	191	1393112	V
WBGene00022337	187	123	1399970	III
WBGene00044761	382	179	1401940	III
WBGene00021785	748	537	1402569	II
WBGene00022353	449	192	1403408	III
WBGene00021784	1622	1057	1403441	II
WBGene00022371	448	307	1405935	I
WBGene00022354	962	627	1406461	III
WBGene00022347	909	646	1409349	III
WBGene00022310	3040	1886	1411014	IV
WBGene00021783	762	429	1412409	II
WBGene00022368	913	623	1413917	I
WBGene00001236	280	184	1414238	III
WBGene00022369	2406	1344	1416582	I
WBGene00022336	19913	9699	1419196	III
WBGene00022348	1226	712	1419855	III
WBGene00002180	595	336	1420929	IV
WBGene00021789	591	309	1425732	II
WBGene00001578	1866	1119	1427653	V
WBGene00000546	248	124	1431190	IV
WBGene00000547	2119	1406	1435465	IV
WBGene00022373	1342	781	1436279	I
WBGene00021781	532	368	1438490	II
WBGene00022335	343	202	1439096	III
WBGene00019979	524	274	1439205	V
WBGene00021047	560	423	1440360	X
WBGene00018159	468	286	1442048	I
WBGene00004969	863	485	1446497	I
WBGene00016997	361	215	1452695	X
WBGene00022307	629	285	1457075	IV
WBGene00000680	17597	16696	1459896	IV
WBGene00019978	5540	2439	1460369	V
WBGene00021791	375	192	1463268	II
WBGene00021779	182	149	1467727	II
WBGene00018757	652	541	1467744	V
WBGene00022350	1209	674	1467876	III
WBGene00018579	133	130	1471075	I
WBGene00006794	4208	2635	1475086	V
WBGene00016995	1015	660	1479542	X
WBGene00016513	281	233	1482042	V
WBGene00001115	146	139	1483083	I
WBGene00022351	334	169	1483624	III
WBGene00000988	626	371	1486532	X
WBGene00019209	2977	1928	1489930	II
WBGene00022361	1615	906	1490431	I
WBGene00003806	1994	1217	1490653	IV
WBGene00045390	180	102	1494769	V
WBGene00044341	481	314	1495441	III
WBGene00016512	318	155	1495634	V
WBGene00019715	1328	813	1496401	III
WBGene00022306	2523	1450	1497626	IV
WBGene00019207	1573	881	1504566	II
WBGene00019716	824	439	1509266	III
WBGene00021772	563	291	1510287	II
WBGene00017298	580	363	1510481	X
WBGene00019368	4207	1298	1510564	IV
WBGene00022360	1072	581	1514755	I
WBGene00004905	761	446	1519962	III
WBGene00022054	490	278	1533774	III
WBGene00019436	134	116	1536366	X
WBGene00018707	206	125	1538354	V
WBGene00022055	880	588	1538471	III
WBGene00022053	1400	787	1540493	III
WBGene00022358	747	505	1543525	I
WBGene00022056	483	333	1544948	III
WBGene00016427	232	105	1545296	IV
WBGene00019435	688	442	1547505	X
WBGene00000681	535	425	1548721	IV
WBGene00044073	233	290	1550878	IV
WBGene00016425	190	280	1553752	IV
WBGene00022057	799	536	1555410	III
WBGene00016424	152	142	1555579	IV
WBGene00022052	718	429	1558800	III
WBGene00021518	452	529	1562184	IV
WBGene00000387	437	386	1567076	V
WBGene00005077	1566	978	1567602	I
WBGene00003794	2255	1227	1567921	IV
WBGene00022051	677	477	1570306	III
WBGene00021246	191	124	1576751	III
WBGene00020326	1503	386	1577378	II
WBGene00022270	262	112	1581394	I
WBGene00004894	461	304	1583155	III
WBGene00017506	3417	1569	1594019	V
WBGene00022271	288	140	1594649	I
WBGene00000416	1246	795	1597318	IV
WBGene00020329	113	110	1599461	II
WBGene00017504	131	135	1601038	V
WBGene00021515	797	576	1601657	IV
WBGene00006464	452	152	1601811	II
WBGene00022269	1147	705	1601838	I
WBGene00019188	531	276	1604906	X
WBGene00021514	2857	1985	1605712	IV
WBGene00021247	360	299	1606824	III
WBGene00022273	133	81	1607705	I
WBGene00015598	319	161	1609252	II
WBGene00017503	189	115	1610263	V
WBGene00044440	869	546	1610390	I
WBGene00015599	124	78	1612788	II
WBGene00003712	516	291	1613892	IV
WBGene00017512	107	74	1615723	V
WBGene00015601	142	76	1616829	II
WBGene00021248	491	220	1617151	III
WBGene00003707	1080	312	1619415	V
WBGene00002025	2742	1190	1619742	III
WBGene00015602	153	78	1619814	II
WBGene00019187	294	184	1621057	X
WBGene00000269	398	238	1621314	I
WBGene00003700	644	359	1622264	V
WBGene00003677	146	105	1624029	IV
WBGene00045255	149	92	1626805	IV
WBGene00021611	136	66	1628105	V
WBGene00022268	1677	981	1629003	I
WBGene00021249	113	66	1630781	III
WBGene00022274	175	94	1634569	I
WBGene00021522	1502	794	1637954	IV
WBGene00003111	383	386	1644588	I
WBGene00022562	2527	1296	1656280	II
WBGene00021253	979	382	1658207	III
WBGene00004497	8792	3988	1659691	IV
WBGene00021512	1517	944	1660110	IV
WBGene00022564	114	118	1661806	II
WBGene00022554	494	306	1663699	II
WBGene00019388	203	150	1665221	V
WBGene00022155	235	72	1667501	I
WBGene00021260	306	161	1672453	III
WBGene00185098	140	105	1672853	I
WBGene00016486	237	148	1676205	X
WBGene00022154	153	79	1680446	I
WBGene00016485	623	404	1682954	X
WBGene00021605	163	195	1691029	V
WBGene00021607	138	149	1692458	V
WBGene00021262	346	156	1696952	III
WBGene00006702	2220	1271	1698349	I
WBGene00003080	424	210	1701361	I
WBGene00021263	342	107	1701712	III
WBGene00022153	507	270	1702105	I
WBGene00003947	2104	1129	1708814	IV
WBGene00022152	904	569	1709587	I
WBGene00019537	2373	1104	1710265	IV
WBGene00018438	172	148	1715303	II
WBGene00021265	137	121	1716527	III
WBGene00019540	5095	2617	1720790	IV
WBGene00006771	1801	1568	1721590	I
WBGene00004779	211	105	1723198	III
WBGene00021507	1720	937	1727930	IV
WBGene00018435	731	342	1728506	II
WBGene00018446	443	345	1733716	II
WBGene00021508	674	417	1740447	IV
WBGene00022159	516	253	1740641	I
WBGene00022805	286	213	1743771	V
WBGene00021506	1428	838	1746001	IV
WBGene00022150	898	511	1751481	I
WBGene00022149	1560	822	1755329	I
WBGene00021602	159	81	1760893	V
WBGene00000976	778	405	1765311	V
WBGene00018101	1227	1101	1767811	II
WBGene00022148	1663	1042	1767887	I
WBGene00022160	146	80	1771367	I
WBGene00018100	351	393	1771647	II
WBGene00015608	761	612	1772085	II
WBGene00021442	1369	738	1772516	III
WBGene00021510	128	98	1775181	IV
WBGene00219271	118	73	1775534	II
WBGene00021441	216	94	1777802	III
WBGene00015609	1117	517	1778772	II
WBGene00015613	129	166	1785262	II
WBGene00015610	126	129	1787217	II
WBGene00006513	252	140	1788333	III
WBGene00022146	859	605	1793254	I
WBGene00022162	443	241	1797435	I
WBGene00002016	208	297	1804334	V
WBGene00002018	241	245	1805178	V
WBGene00000545	872	652	1807740	III
WBGene00022144	1888	800	1808092	I
WBGene00001632	2447	1606	1815851	V
WBGene00000683	529	243	1817392	IV
WBGene00004249	733	518	1821149	III
WBGene00044344	539	308	1821579	V
WBGene00022141	1685	1034	1823447	I
WBGene00020360	595	198	1824629	II
WBGene00021443	1801	1341	1824919	III
WBGene00020359	250	166	1830632	II
WBGene00044746	228	133	1832167	I
WBGene00020358	304	164	1832338	II
WBGene00016907	3678	1745	1832897	I
WBGene00021440	1180	783	1834513	III
WBGene00004441	27041	12587	1834883	I
WBGene00001196	1365	756	1835661	I
WBGene00020830	248	178	1840554	X
WBGene00001309	1088	751	1842445	I
WBGene00016883	396	220	1843145	II
WBGene00003750	172	67	1843384	I
WBGene00006461	204	118	1845200	I
WBGene00020393	1722	757	1846201	V
WBGene00000462	138	105	1846608	X
WBGene00001173	5645	3340	1848071	IV
WBGene00020388	116	71	1848073	V
WBGene00000444	248	191	1848779	X
WBGene00004163	288	165	1849047	III
WBGene00000460	275	189	1853874	X
WBGene00000941	805	536	1859888	III
WBGene00021444	951	602	1860429	III
WBGene00004743	939	517	1862607	I
WBGene00020389	2594	1457	1864178	V
WBGene00020392	1639	917	1869213	V
WBGene00015828	352	295	1869420	II
WBGene00015839	255	103	1871542	II
WBGene00020391	2606	1304	1872246	V
WBGene00022139	1174	698	1874008	I
WBGene00021305	1165	737	1875478	V
WBGene00004886	428	297	1878365	III
WBGene00022138	693	491	1895161	I
WBGene00016719	475	425	1900234	II
WBGene00015245	900	535	1900774	III
WBGene00001186	460	375	1902322	IV
WBGene00016717	283	248	1905404	II
WBGene00004128	1930	1053	1905958	III
WBGene00021768	1576	2461	1911684	I
WBGene00004352	305	231	1915258	X
WBGene00018665	260	158	1916713	II
WBGene00018667	216	122	1919888	II
WBGene00018668	574	308	1921433	II
WBGene00018681	1005	649	1924001	IV
WBGene00021766	1553	1102	1924300	I
WBGene00018659	407	256	1926462	II
WBGene00020280	1425	557	1927223	V
WBGene00021765	1126	818	1932346	I
WBGene00235352	335	197	1937063	II
WBGene00018721	2130	1366	1945058	III
WBGene00018680	188	116	1948191	IV
WBGene00004491	11757	8993	1950535	III
WBGene00021771	924	666	1950594	I
WBGene00018723	208	131	1951526	III
WBGene00020115	2812	1680	1952013	III
WBGene00018679	408	310	1953579	IV
WBGene00138717	711	441	1956711	IV
WBGene00044438	368	221	1958707	I
WBGene00018678	801	532	1959854	IV
WBGene00018689	140	73	1962573	X
WBGene00020116	230	112	1963557	III
WBGene00006738	446	262	1963634	IV
WBGene00021655	689	377	1965481	IV
WBGene00021764	693	449	1967772	I
WBGene00020343	870	752	1969528	V
WBGene00044466	213	127	1969737	IV
WBGene00022298	164	73	1970681	IV
WBGene00020117	150	100	1971182	III
WBGene00022297	934	490	1973705	IV
WBGene00219451	269	181	1978014	X
WBGene00021763	2793	1731	1978030	I
WBGene00020341	288	146	1979268	V
WBGene00022300	909	556	1981396	IV
WBGene00020340	2240	1149	1982613	V
WBGene00001569	1191	862	1986469	X
WBGene00021238	869	495	1988246	I
WBGene00006589	870	555	1989471	V
WBGene00022296	2169	1458	1993089	IV
WBGene00000111	460	265	1996105	V
WBGene00016555	745	354	1996537	II
WBGene00022301	1838	1171	2009038	IV
WBGene00019090	171	122	2015836	V
WBGene00022413	1641	1671	2019148	X
WBGene00019092	478	248	2022674	V
WBGene00021237	683	464	2026316	I
WBGene00022412	528	231	2026642	X
WBGene00019139	203	77	2027612	II
WBGene00019140	196	133	2029236	II
WBGene00019141	805	521	2030753	II
WBGene00022415	740	377	2030960	X
WBGene00019142	163	70	2032316	II
WBGene00021239	338	272	2034322	I
WBGene00019132	266	167	2035695	II
WBGene00022418	183	145	2039397	X
WBGene00015014	125	66	2044619	II
WBGene00017210	1893	1004	2053919	II
WBGene00021487	135	121	2057537	V
WBGene00003676	553	283	2061106	V
WBGene00021346	787	481	2061667	I
WBGene00021347	736	398	2064293	I
WBGene00021348	926	558	2064976	I
WBGene00018657	1583	1070	2066554	X
WBGene00021486	4265	2135	2068449	V
WBGene00004409	11895	5912	2069086	I
WBGene00021493	221	139	2069138	V
WBGene00021350	30912	14789	2069681	I
WBGene00004014	1941	1039	2071352	I
WBGene00021351	5111	2927	2072680	I
WBGene00018656	1572	971	2074450	X
WBGene00021352	1550	1128	2078955	I
WBGene00019875	1048	484	2084034	IV
WBGene00003087	326	215	2089704	X
WBGene00018099	394	161	2090669	V
WBGene00021702	900	486	2092709	III
WBGene00003799	1092	679	2097346	I
WBGene00219423	517	338	2100151	IV
WBGene00004088	738	434	2102295	III
WBGene00020075	554	395	2104524	II
WBGene00000514	132	102	2106398	V
WBGene00018735	136	104	2108982	X
WBGene00016027	2024	1700	2111890	IV
WBGene00021704	247	135	2112416	III
WBGene00021354	310	158	2113656	I
WBGene00018739	346	319	2123413	X
WBGene00021698	622	414	2124137	III
WBGene00017719	2322	1282	2127535	V
WBGene00021355	3443	1931	2128588	I
WBGene00020073	124	120	2131070	II
WBGene00017724	175	83	2131473	V
WBGene00016918	1293	994	2136951	IV
WBGene00001065	225	158	2144605	X
WBGene00016920	319	67	2146672	IV
WBGene00021697	1928	940	2151945	III
WBGene00016544	178	71	2154008	II
WBGene00016695	154	112	2158659	V
WBGene00021009	1698	1142	2160038	I
WBGene00018593	287	155	2173890	X
WBGene00016335	1232	732	2176741	II
WBGene00022134	3103	1726	2177896	IV
WBGene00016341	185	120	2187149	II
WBGene00021985	414	245	2192348	II
WBGene00003612	236	189	2192485	V
WBGene00001515	199	105	2192504	X
WBGene00020765	620	272	2196525	X
WBGene00021167	1130	445	2197997	V
WBGene00016524	621	419	2198006	III
WBGene00044650	1935	1013	2199041	IV
WBGene00021984	381	201	2208112	II
WBGene00016523	177	165	2208164	III
WBGene00003723	322	208	2210510	V
WBGene00003968	143	122	2211051	X
WBGene00189950	206	139	2211420	III
WBGene00018415	204	110	2212871	V
WBGene00021986	1382	996	2215480	II
WBGene00003646	162	105	2219004	V
WBGene00021005	536	581	2219468	I
WBGene00020509	2090	859	2221150	X
WBGene00020208	1305	735	2222828	IV
WBGene00018784	952	451	2224359	II
WBGene00016522	147	105	2224672	III
WBGene00003693	355	259	2225430	V
WBGene00018785	1027	596	2225806	II
WBGene00003617	587	388	2227203	V
WBGene00003716	265	188	2229081	V
WBGene00003724	446	300	2231223	V
WBGene00003686	240	196	2233477	V
WBGene00018782	4016	2036	2233540	II
WBGene00020508	331	222	2234324	X
WBGene00016520	303	210	2234884	III
WBGene00021007	850	415	2235602	I
WBGene00018413	322	156	2236140	V
WBGene00019785	431	220	2237663	IV
WBGene00020507	3761	1990	2237911	X
WBGene00004423	13856	5798	2241738	X
WBGene00018262	319	224	2242778	V
WBGene00018781	364	207	2243642	II
WBGene00019783	212	121	2245865	IV
WBGene00017398	910	379	2250131	I
WBGene00018260	1148	453	2250540	V
WBGene00019786	682	454	2253003	IV
WBGene00019586	458	263	2255161	II
WBGene00000797	293	131	2255848	X
WBGene00000020	771	431	2255921	I
WBGene00018265	177	97	2257420	V
WBGene00014999	236	148	2259150	X
WBGene00019787	221	140	2264305	IV
WBGene00002990	363	223	2275861	IV
WBGene00003649	165	114	2276013	V
WBGene00019589	436	183	2276742	II
WBGene00019592	435	283	2280870	II
WBGene00000408	2508	1643	2281503	I
WBGene00020852	238	173	2281759	V
WBGene00021858	420	200	2282025	III
WBGene00020427	354	227	2283998	X
WBGene00019593	186	144	2287030	II
WBGene00019590	304	167	2290917	II
WBGene00021469	3939	2666	2293127	I
WBGene00020426	464	129	2294750	X
WBGene00020850	163	85	2294877	V
WBGene00021863	582	396	2295328	III
WBGene00021470	2865	1602	2297392	I
WBGene00015112	340	276	2299854	II
WBGene00021468	1122	1027	2300086	I
WBGene00002039	770	537	2303082	X
WBGene00002047	2325	1370	2304513	I
WBGene00015110	183	211	2307041	II
WBGene00021467	1037	546	2307267	I
WBGene00006920	2281	1247	2307815	IV
WBGene00021476	407	246	2308976	I
WBGene00021475	315	182	2312496	I
WBGene00021466	3363	1589	2313271	I
WBGene00021857	2871	1531	2314436	III
WBGene00020135	372	366	2314894	X
WBGene00006912	947	459	2315460	IV
WBGene00021465	838	324	2316307	I
WBGene00022873	181	85	2318189	II
WBGene00003156	4402	2335	2318291	I
WBGene00022868	469	302	2320334	II
WBGene00219275	672	378	2322025	I
WBGene00021415	144	117	2323271	IV
WBGene00022867	644	259	2323376	II
WBGene00021471	132	71	2323992	I
WBGene00017501	630	82	2324634	V
WBGene00017498	1239	265	2326678	V
WBGene00021867	136	77	2329577	III
WBGene00021472	237	84	2330895	I
WBGene00021856	1412	830	2331572	III
WBGene00021464	314	105	2333338	I
WBGene00021425	657	400	2333837	IV
WBGene00018384	3520	1573	2335897	II
WBGene00018386	368	275	2337896	II
WBGene00004016	528	356	2343573	III
WBGene00003740	272	73	2343947	X
WBGene00001589	1237	821	2347591	III
WBGene00021423	663	410	2349271	IV
WBGene00019150	113	74	2369670	III
WBGene00018578	145	90	2375985	X
WBGene00019199	830	483	2376193	III
WBGene00021473	229	118	2377089	I
WBGene00194641	483	300	2381582	X
WBGene00021474	1831	1110	2382953	I
WBGene00021421	1484	920	2384013	IV
WBGene00018576	147	71	2385753	X
WBGene00021420	2254	1313	2389445	IV
WBGene00021419	512	293	2390821	IV
WBGene00000506	469	311	2394325	III
WBGene00016620	291	202	2398811	X
WBGene00021430	705	535	2399484	IV
WBGene00021460	1313	691	2402230	I
WBGene00016617	273	193	2404024	X
WBGene00021021	458	306	2406310	III
WBGene00018353	148	152	2409633	II
WBGene00016614	318	242	2409691	X
WBGene00021022	766	448	2411081	III
WBGene00044672	107	104	2414123	II
WBGene00018354	181	119	2415997	II
WBGene00017734	2007	1219	2418461	I
WBGene00021020	1038	747	2418514	III
WBGene00017735	2600	1647	2420834	I
WBGene00017736	151	93	2422153	I
WBGene00018351	577	472	2422205	II
WBGene00021019	467	251	2424355	III
WBGene00018355	164	174	2426366	II
WBGene00021018	250	256	2428204	III
WBGene00017737	221	108	2429675	I
WBGene00020301	618	485	2429859	X
WBGene00017738	953	567	2432590	I
WBGene00017733	1673	1057	2434002	I
WBGene00000402	225	130	2436498	IV
WBGene00235340	196	205	2441318	IV
WBGene00006882	598	267	2443279	II
WBGene00001484	261	180	2445117	X
WBGene00017103	267	210	2446209	III
WBGene00003711	328	145	2449338	III
WBGene00004129	111	70	2452970	II
WBGene00017102	256	141	2457413	III
WBGene00017101	537	341	2459042	III
WBGene00006647	527	288	2460842	II
WBGene00016670	6730	2335	2464456	IV
WBGene00016669	280	91	2467678	IV
WBGene00022280	286	157	2468793	I
WBGene00019867	206	131	2471540	X
WBGene00022281	617	318	2472060	I
WBGene00018769	680	365	2473512	II
WBGene00004884	2576	1654	2473854	III
WBGene00044468	400	541	2482255	IV
WBGene00019318	173	125	2483263	X
WBGene00001232	1652	865	2485861	I
WBGene00021847	991	547	2487710	III
WBGene00022090	705	402	2488820	IV
WBGene00001844	348	269	2489048	X
WBGene00021277	2657	1649	2489976	I
WBGene00022092	2179	1379	2494516	IV
WBGene00022089	14588	7379	2495735	IV
WBGene00019317	147	78	2496180	X
WBGene00022087	1031	609	2497803	IV
WBGene00021276	1349	825	2498134	I
WBGene00021852	4868	1675	2503419	III
WBGene00022093	1357	507	2504633	IV
WBGene00019130	1259	922	2504878	II
WBGene00021850	377	171	2508818	III
WBGene00006365	223	167	2509313	X
WBGene00004314	1301	788	2511648	III
WBGene00044061	355	294	2525191	X
WBGene00019341	534	356	2525219	II
WBGene00021849	2071	1077	2529063	III
WBGene00000464	2207	1554	2530613	III
WBGene00019337	220	146	2546225	II
WBGene00001410	212	130	2549920	III
WBGene00000004	346	279	2552260	X
WBGene00018717	262	195	2557967	X
WBGene00018718	569	415	2559711	X
WBGene00001758	821	247	2561690	V
WBGene00021853	246	163	2562919	III
WBGene00017280	1731	1058	2565275	II
WBGene00018719	219	143	2566543	X
WBGene00021855	1428	842	2567404	III
WBGene00022083	133	73	2568614	IV
WBGene00000006	168	97	2571740	I
WBGene00021854	497	267	2572158	III
WBGene00018714	136	107	2573099	X
WBGene00045268	229	174	2577742	X
WBGene00022197	126	105	2579293	III
WBGene00001404	2942	1573	2581015	I
WBGene00000160	1623	1108	2583971	III
WBGene00022196	534	275	2586555	III
WBGene00004226	341	158	2587527	I
WBGene00003630	1180	639	2594003	X
WBGene00007019	1356	916	2598053	III
WBGene00019461	176	72	2599979	I
WBGene00022078	408	288	2601141	IV
WBGene00018762	1751	1123	2602153	V
WBGene00022198	329	224	2603971	III
WBGene00000832	587	387	2606741	I
WBGene00022195	693	442	2608017	III
WBGene00022077	407	233	2608051	IV
WBGene00020194	188	110	2608228	X
WBGene00022101	335	204	2610436	IV
WBGene00020195	961	701	2610826	X
WBGene00022099	379	253	2612432	IV
WBGene00022076	392	161	2614194	IV
WBGene00018758	605	392	2615310	V
WBGene00017059	148	77	2616934	II
WBGene00004878	467	249	2618869	IV
WBGene00022194	316	164	2618963	III
WBGene00022193	1490	1034	2619936	III
WBGene00021270	1766	890	2620650	I
WBGene00018837	400	282	2621272	X
WBGene00021269	225	121	2621957	I
WBGene00000800	3829	2250	2623099	I
WBGene00022192	1556	1096	2623170	III
WBGene00022191	209	74	2629013	III
WBGene00003161	1252	806	2636227	IV
WBGene00019212	147	85	2636383	III
WBGene00017708	406	252	2638388	II
WBGene00020957	1167	755	2639335	V
WBGene00022075	285	177	2641310	IV
WBGene00018230	1476	851	2642724	I
WBGene00004367	1063	734	2642973	IV
WBGene00018232	413	169	2645266	I
WBGene00020962	512	260	2647055	V
WBGene00022100	156	104	2650383	IV
WBGene00020955	225	151	2653083	V
WBGene00002915	1376	877	2658083	III
WBGene00020954	621	559	2666900	V
WBGene00022074	1832	1165	2667050	IV
WBGene00015621	526	337	2668127	X
WBGene00017979	909	402	2668160	I
WBGene00020952	410	255	2671455	V
WBGene00017980	299	232	2672940	I
WBGene00020953	553	269	2672986	V
WBGene00022376	684	444	2676512	IV
WBGene00017712	392	366	2678041	II
WBGene00044651	1317	782	2680098	IV
WBGene00003941	1296	720	2681451	III
WBGene00020511	1132	726	2682754	X
WBGene00000788	11579	8393	2686640	I
WBGene00021564	415	195	2688455	V
WBGene00022378	1751	988	2688913	IV
WBGene00020510	169	100	2688990	X
WBGene00022174	1185	691	2690160	III
WBGene00021563	478	287	2694771	V
WBGene00020158	8789	5470	2694923	X
WBGene00020160	395	373	2698257	X
WBGene00021562	3170	1866	2698972	V
WBGene00022170	5127	2779	2699663	III
WBGene00022173	413	245	2700937	III
WBGene00006705	880	505	2704741	IV
WBGene00003006	434	221	2706883	I
WBGene00016048	4983	1723	2706966	V
WBGene00022175	156	74	2707726	III
WBGene00022382	1958	1877	2710121	IV
WBGene00006742	556	315	2710920	X
WBGene00022379	142	102	2713174	IV
WBGene00020229	529	283	2714649	II
WBGene00020230	525	302	2716555	II
WBGene00022380	2375	1257	2716687	IV
WBGene00001048	1921	1094	2718027	I
WBGene00022176	1131	725	2718230	III
WBGene00022381	1303	725	2720313	IV
WBGene00022128	949	612	2721588	I
WBGene00022172	560	328	2726116	III
WBGene00004920	226	170	2727014	I
WBGene00022127	2831	1560	2730004	I
WBGene00016052	371	210	2730622	V
WBGene00022177	114	68	2731340	III
WBGene00022126	990	642	2731562	I
WBGene00022178	968	1155	2734080	III
WBGene00022129	273	174	2735353	I
WBGene00022180	154	124	2747120	III
WBGene00017916	672	510	2751741	II
WBGene00004043	1844	887	2755540	I
WBGene00022181	1666	384	2757084	III
WBGene00022130	265	91	2759023	I
WBGene00004946	3043	1943	2761158	I
WBGene00000977	790	511	2763981	V
WBGene00022182	1729	1191	2764010	III
WBGene00021876	3210	2098	2765715	IV
WBGene00017250	215	168	2767250	II
WBGene00002244	1527	849	2769356	III
WBGene00006496	740	415	2772042	X
WBGene00022125	171	85	2774912	I
WBGene00022131	522	293	2776364	I
WBGene00021877	912	702	2777223	IV
WBGene00022171	333	165	2781056	III
WBGene00017246	237	91	2781655	II
WBGene00004130	1844	1442	2781939	V
WBGene00022185	1190	707	2782731	III
WBGene00020990	313	146	2784620	I
WBGene00022169	2093	1170	2786852	III
WBGene00017245	1264	760	2787481	II
WBGene00044609	450	320	2788441	III
WBGene00021868	1937	1156	2788689	IV
WBGene00020989	947	190	2791687	I
WBGene00003709	283	196	2794016	II
WBGene00045397	244	228	2797061	IV
WBGene00021875	218	108	2799689	IV
WBGene00002174	1864	1205	2802803	I
WBGene00021894	886	241	2803952	IV
WBGene00022168	1155	702	2805430	III
WBGene00044488	240	186	2805857	IV
WBGene00050944	323	231	2808054	X
WBGene00018823	676	452	2810398	V
WBGene00007000	4764	2679	2812143	III
WBGene00019683	155	100	2812818	II
WBGene00021878	237	105	2814568	IV
WBGene00020987	182	93	2816415	I
WBGene00022167	921	497	2819280	III
WBGene00004077	1065	636	2822243	I
WBGene00043062	121	110	2823746	IV
WBGene00020183	411	207	2823806	V
WBGene00022166	1120	649	2827070	III
WBGene00019686	302	249	2828577	II
WBGene00044489	198	117	2832906	IV
WBGene00022201	1069	688	2834205	X
WBGene00022188	230	145	2834663	III
WBGene00021873	889	346	2835664	IV
WBGene00022190	189	102	2836639	III
WBGene00043702	514	317	2838608	IV
WBGene00022441	470	297	2839304	II
WBGene00021879	4138	1895	2839371	IV
WBGene00019261	3395	2335	2842044	III
WBGene00021895	998	525	2842462	IV
WBGene00002210	791	389	2843922	X
WBGene00004210	1643	631	2845412	II
WBGene00020182	323	109	2849343	V
WBGene00021872	209	213	2850886	IV
WBGene00044492	167	82	2851691	IV
WBGene00018740	685	438	2853674	X
WBGene00021128	476	294	2853970	I
WBGene00018991	952	540	2856229	III
WBGene00022115	366	218	2866506	I
WBGene00022117	1201	686	2870141	I
WBGene00021882	1527	757	2872023	IV
WBGene00018138	280	1922	2872465	V
WBGene00018743	204	332	2872744	X
WBGene00018990	303	211	2874818	III
WBGene00004412	26824	12792	2875398	I
WBGene00018140	419	324	2875734	V
WBGene00022114	4542	2267	2876932	I
WBGene00022447	164	109	2877419	II
WBGene00022113	647	358	2878578	I
WBGene00022118	1161	886	2880876	I
WBGene00002055	417	254	2881393	V
WBGene00018989	113	89	2882289	III
WBGene00000199	930	585	2883549	I
WBGene00022448	655	331	2885514	II
WBGene00015171	216	177	2885858	X
WBGene00005020	987	667	2889116	II
WBGene00015172	674	174	2890569	X
WBGene00235102	1786	1349	2890882	IV
WBGene00021883	1496	816	2891560	IV
WBGene00021884	146	72	2893814	IV
WBGene00022450	535	299	2894771	II
WBGene00022119	3721	2092	2895329	I
WBGene00016281	331	378	2896610	V
WBGene00016282	198	95	2900269	V
WBGene00001791	220	112	2901325	I
WBGene00006710	356	185	2901401	II
WBGene00022110	255	233	2903635	I
WBGene00016283	425	324	2905767	V
WBGene00004049	1620	916	2907725	I
WBGene00003776	5112	5698	2909527	X
WBGene00019994	265	211	2910906	III
WBGene00022453	516	331	2913705	II
WBGene00022108	205	108	2915176	I
WBGene00044493	208	150	2918029	IV
WBGene00022452	976	655	2919710	II
WBGene00021887	307	181	2919827	IV
WBGene00006708	459	301	2922591	IV
WBGene00022712	328	156	2923917	II
WBGene00022107	891	555	2925239	I
WBGene00021888	1666	1010	2927517	IV
WBGene00022122	2339	1384	2928395	I
WBGene00003836	1004	662	2929777	I
WBGene00021870	153	75	2931403	IV
WBGene00022121	998	648	2931461	I
WBGene00022200	1988	1310	2933361	X
WBGene00019997	293	168	2937040	III
WBGene00022199	1235	917	2940872	X
WBGene00044901	267	92	2945803	X
WBGene00019157	1258	679	2947118	III
WBGene00000237	399	432	2949601	I
WBGene00021528	172	138	2957935	X
WBGene00019158	967	598	2962201	III
WBGene00002243	127	83	2964334	IV
WBGene00003678	1081	622	2976639	II
WBGene00021915	111	72	2982409	III
WBGene00021890	1602	951	2986050	IV
WBGene00022124	1116	869	2986104	I
WBGene00019513	460	270	2988300	II
WBGene00019512	166	73	2991605	II
WBGene00000898	4934	3336	2994514	III
WBGene00001046	922	566	2996488	I
WBGene00019511	770	601	2997021	II
WBGene00219425	291	183	3000541	IV
WBGene00016576	377	274	3000768	II
WBGene00021839	5648	3320	3001406	I
WBGene00016574	165	167	3003967	II
WBGene00003186	1024	573	3005403	I
WBGene00016573	228	170	3005799	II
WBGene00000625	479	227	3010684	I
WBGene00001461	1307	508	3012182	X
WBGene00021869	2151	1172	3012587	IV
WBGene00021843	3120	1771	3015742	I
WBGene00021842	1293	847	3021651	I
WBGene00021893	263	211	3023403	IV
WBGene00019105	418	145	3024549	V
WBGene00000175	4182	1944	3025063	X
WBGene00021844	2261	1474	3028325	I
WBGene00021845	891	594	3031338	I
WBGene00019738	321	87	3031783	X
WBGene00022069	8326	5065	3032713	IV
WBGene00015197	352	176	3032780	II
WBGene00021841	1548	932	3032935	I
WBGene00016343	195	87	3036427	X
WBGene00019108	132	73	3037812	V
WBGene00006679	978	322	3050369	X
WBGene00021846	1158	836	3052048	I
WBGene00019169	161	114	3052378	III
WBGene00015200	227	176	3052627	II
WBGene00022067	752	459	3053728	IV
WBGene00002997	256	169	3056822	II
WBGene00021840	615	406	3057694	I
WBGene00019170	539	357	3060537	III
WBGene00021294	926	578	3062541	II
WBGene00022072	191	139	3067869	IV
WBGene00006725	35632	16273	3068310	III
WBGene00000205	361	196	3069325	I
WBGene00019168	5927	3518	3070523	III
WBGene00019697	1429	944	3070968	I
WBGene00021295	840	506	3071173	II
WBGene00022073	253	153	3077466	IV
WBGene00021292	2417	1284	3078796	II
WBGene00019698	2153	1257	3085014	I
WBGene00004787	345	164	3086671	III
WBGene00016849	298	173	3089068	V
WBGene00018701	3955	2331	3089549	X
WBGene00016860	455	239	3091812	V
WBGene00019167	601	358	3091872	III
WBGene00006948	378	211	3092395	X
WBGene00018703	715	535	3095428	X
WBGene00018704	375	440	3100166	X
WBGene00021818	331	222	3101229	III
WBGene00003654	490	345	3101851	I
WBGene00003153	4433	2309	3103157	IV
WBGene00019611	359	291	3103235	X
WBGene00019612	626	253	3106535	X
WBGene00021296	375	212	3109365	II
WBGene00001685	5622	3330	3112091	X
WBGene00021820	797	433	3112428	III
WBGene00001684	4265	2402	3113443	X
WBGene00021288	403	198	3114234	II
WBGene00003124	248	139	3114668	X
WBGene00004951	3251	2362	3117439	X
WBGene00020408	519	334	3119332	II
WBGene00020407	222	120	3129162	II
WBGene00003175	583	287	3131574	III
WBGene00000626	850	446	3137185	I
WBGene00045387	409	182	3138541	I
WBGene00019597	218	87	3141704	I
WBGene00016634	177	83	3142198	III
WBGene00003062	2642	1673	3144411	I
WBGene00015790	129	74	3145565	X
WBGene00019595	914	519	3148014	I
WBGene00015791	401	255	3151148	X
WBGene00016474	368	825	3157086	V
WBGene00016481	116	289	3158404	V
WBGene00006888	3759	2053	3158492	I
WBGene00002220	347	192	3159940	X
WBGene00021829	371	214	3162813	I
WBGene00021828	1006	624	3163688	I
WBGene00015789	163	100	3164525	X
WBGene00020104	691	440	3165639	III
WBGene00015793	498	289	3165826	X
WBGene00021827	609	457	3168193	I
WBGene00002217	1729	1229	3171420	X
WBGene00020103	535	315	3171592	III
WBGene00021830	826	414	3173268	I
WBGene00020102	1896	1081	3175331	III
WBGene00021831	2449	1652	3176418	I
WBGene00005552	360	232	3177963	II
WBGene00020101	359	207	3183677	III
WBGene00022260	407	263	3191302	V
WBGene00022259	210	174	3193419	V
WBGene00021832	2011	1220	3193528	I
WBGene00022258	159	125	3195408	V
WBGene00020105	241	106	3195557	III
WBGene00006452	1911	1886	3198477	III
WBGene00019525	456	143	3198544	V
WBGene00001494	217	119	3200795	III
WBGene00021835	408	256	3206762	I
WBGene00000168	1081	641	3210196	V
WBGene00017891	813	509	3210470	X
WBGene00001481	709	481	3211046	I
WBGene00019766	1637	1022	3213760	IV
WBGene00004404	580	302	3217288	I
WBGene00194717	259	387	3219687	II
WBGene00022059	1420	908	3222440	IV
WBGene00000413	1315	889	3223160	I
WBGene00022573	153	92	3223333	II
WBGene00022574	425	198	3224770	II
WBGene00017892	2979	3901	3227501	X
WBGene00021826	1619	900	3229431	I
WBGene00003258	1461	1001	3233391	I
WBGene00018237	15603	10107	3235754	X
WBGene00021800	2703	1451	3241717	III
WBGene00018238	389	297	3243886	X
WBGene00021834	1317	657	3244151	I
WBGene00015913	16723	19423	3245087	II
WBGene00015912	583	406	3246316	II
WBGene00006535	245	109	3252800	X
WBGene00022060	265	160	3253261	IV
WBGene00002255	1680	1539	3257372	X
WBGene00020831	2383	1170	3258910	IV
WBGene00002253	4572	2733	3259142	X
WBGene00002254	7158	6964	3260610	X
WBGene00021552	1848	1133	3264111	I
WBGene00044469	433	296	3266404	IV
WBGene00020915	6534	3342	3267094	I
WBGene00021808	511	301	3267186	III
WBGene00020881	123	183	3268688	V
WBGene00004154	276	227	3269397	I
WBGene00019554	287	198	3276007	X
WBGene00020883	148	104	3276956	V
WBGene00020869	776	883	3280379	V
WBGene00021814	306	90	3282308	III
WBGene00020914	130	83	3287336	I
WBGene00021815	621	378	3290119	III
WBGene00020917	941	663	3293184	I
WBGene00021813	1706	993	3294743	III
WBGene00021088	6173	3125	3295135	IV
WBGene00018200	467	267	3295405	II
WBGene00018195	599	453	3296883	II
WBGene00021812	942	733	3297451	III
WBGene00000036	709	388	3301368	I
WBGene00018060	152	87	3310123	V
WBGene00021082	136	72	3311276	IV
WBGene00021811	1000	703	3311310	III
WBGene00018061	220	119	3313244	V
WBGene00017381	123	114	3315314	X
WBGene00018052	252	268	3316307	V
WBGene00021816	1219	807	3317725	III
WBGene00021548	564	335	3317978	I
WBGene00021549	773	343	3318830	I
WBGene00021810	639	383	3322853	III
WBGene00017380	522	300	3333124	X
WBGene00018328	378	231	3334042	IV
WBGene00001999	5642	3544	3336920	IV
WBGene00021547	536	326	3338367	I
WBGene00021551	2023	1338	3340212	I
WBGene00017459	207	134	3341297	II
WBGene00023427	281	178	3342335	II
WBGene00018330	653	515	3342515	IV
WBGene00017461	318	197	3343731	II
WBGene00001559	849	473	3344873	III
WBGene00017460	829	658	3345218	II
WBGene00015885	170	117	3345312	V
WBGene00017456	115	109	3347574	II
WBGene00017452	319	230	3348560	II
WBGene00021039	283	151	3352434	I
WBGene00017450	265	183	3359139	II
WBGene00015434	328	189	3362775	V
WBGene00004183	193	147	3363666	III
WBGene00021035	7029	4379	3367640	I
WBGene00015433	147	326	3368073	V
WBGene00021038	1603	889	3368852	I
WBGene00021730	569	437	3369174	II
WBGene00021952	4703	2838	3369197	IV
WBGene00015249	1512	1169	3373387	IV
WBGene00021036	699	671	3374776	I
WBGene00022769	241	200	3376834	X
WBGene00021725	164	140	3377089	II
WBGene00009738	268	174	3377396	III
WBGene00015250	590	391	3378485	IV
WBGene00020290	1215	939	3381830	II
WBGene00015251	472	284	3382949	IV
WBGene00015248	2578	1350	3385910	IV
WBGene00008348	391	346	3389919	III
WBGene00003372	4030	2630	3392514	III
WBGene00006865	152	71	3393862	X
WBGene00010303	1236	692	3396355	III
WBGene00000503	564	659	3397613	X
WBGene00010304	855	554	3397743	III
WBGene00020617	317	382	3398690	V
WBGene00015413	1837	1042	3399672	IV
WBGene00003795	8363	4559	3400638	III
WBGene00006929	68360	51343	3403471	X
WBGene00017553	164	85	3403835	II
WBGene00010305	568	375	3404863	III
WBGene00010306	2990	1944	3405568	III
WBGene00006810	426	372	3408674	X
WBGene00019362	569	320	3410013	I
WBGene00000990	123	115	3412876	X
WBGene00017550	156	80	3416828	II
WBGene00019361	479	307	3419600	I
WBGene00017557	414	231	3420663	II
WBGene00010450	391	230	3425738	III
WBGene00022823	131	94	3427358	X
WBGene00010449	209	90	3428067	III
WBGene00015855	232	132	3429700	II
WBGene00004775	3862	2307	3433158	I
WBGene00004976	308	189	3439011	III
WBGene00006440	1650	1051	3439099	I
WBGene00021639	181	126	3439364	I
WBGene00001692	451	364	3439655	IV
WBGene00001699	201	104	3441055	IV
WBGene00022822	1074	698	3441839	X
WBGene00015842	1114	884	3443488	II
WBGene00022821	1484	898	3443826	X
WBGene00015843	534	384	3444669	II
WBGene00045394	3698	2612	3444814	X
WBGene00015853	1100	793	3445756	II
WBGene00022820	4477	2588	3446311	X
WBGene00015851	177	164	3446947	II
WBGene00003422	3202	1992	3449326	I
WBGene00015852	271	148	3449814	II
WBGene00004729	1227	855	3451908	X
WBGene00015850	266	144	3452721	II
WBGene00015849	260	205	3453708	II
WBGene00007921	1505	965	3453786	III
WBGene00007927	841	487	3460406	III
WBGene00007922	1477	932	3461703	III
WBGene00021640	709	429	3462258	I
WBGene00019048	133	109	3463387	IV
WBGene00017867	142	92	3463814	V
WBGene00004978	2105	1207	3467132	I
WBGene00007923	579	355	3467664	III
WBGene00007924	585	475	3472003	III
WBGene00021641	2333	728	3472965	I
WBGene00021638	1379	940	3479353	I
WBGene00006952	340	96	3480250	X
WBGene00003096	5481	16217	3481432	V
WBGene00000794	3959	2330	3481997	I
WBGene00004896	2225	1449	3482408	II
WBGene00007925	189	107	3482591	III
WBGene00007926	469	346	3484773	III
WBGene00010815	2702	1819	3493814	III
WBGene00021721	604	340	3493907	II
WBGene00001620	573	447	3496026	X
WBGene00015713	2547	1874	3499253	X
WBGene00010814	829	450	3499370	III
WBGene00000647	2041	1090	3500077	II
WBGene00021637	1185	636	3502736	I
WBGene00004428	34604	16233	3502841	III
WBGene00021715	477	282	3502968	II
WBGene00015577	1556	692	3503080	V
WBGene00010809	3253	1568	3503710	III
WBGene00021714	610	443	3505017	II
WBGene00010810	1772	1022	3505643	III
WBGene00000424	419	278	3506328	IV
WBGene00021644	955	554	3508398	I
WBGene00015658	1522	925	3509631	IV
WBGene00010812	525	263	3510237	III
WBGene00010811	1660	1274	3510924	III
WBGene00021636	2345	1584	3516450	I
WBGene00006769	685	486	3516886	IV
WBGene00010813	521	286	3521133	III
WBGene00021645	333	296	3523313	I
WBGene00019778	821	559	3527354	IV
WBGene00004451	125	66	3528642	III
WBGene00019777	394	246	3532467	IV
WBGene00000162	1433	905	3532527	II
WBGene00021635	1075	627	3533885	I
WBGene00008288	691	533	3534656	III
WBGene00006863	760	536	3537635	X
WBGene00000248	694	453	3537642	III
WBGene00004389	2268	1599	3539553	I
WBGene00015037	156	143	3540172	IV
WBGene00004350	1002	492	3542542	X
WBGene00015038	133	68	3543628	IV
WBGene00021634	978	662	3547071	I
WBGene00021148	330	168	3550652	II
WBGene00021646	316	203	3551949	I
WBGene00020756	182	116	3553134	V
WBGene00021149	986	682	3553724	II
WBGene00006928	1200	2647	3558769	X
WBGene00021647	939	537	3559934	I
WBGene00021136	219	121	3561749	II
WBGene00045399	145	120	3564040	I
WBGene00003060	2648	1898	3564963	I
WBGene00006927	3934	3978	3567355	X
WBGene00000515	442	249	3576606	X
WBGene00020696	8566	5201	3579023	V
WBGene00021374	189	149	3579621	IV
WBGene00021376	248	187	3580970	IV
WBGene00006383	610	296	3584400	IV
WBGene00004422	21273	11272	3585312	V
WBGene00020695	1396	756	3586639	V
WBGene00020846	870	370	3588857	X
WBGene00004213	611	383	3590722	III
WBGene00021377	704	358	3593954	IV
WBGene00020847	2408	780	3597276	X
WBGene00021378	386	299	3598656	IV
WBGene00021633	173	83	3601291	I
WBGene00015954	188	95	3601831	X
WBGene00021381	482	202	3603550	IV
WBGene00015955	709	444	3604291	X
WBGene00021648	551	421	3604515	I
WBGene00021649	1088	692	3606407	I
WBGene00015956	2922	1518	3606656	X
WBGene00002188	123	156	3606784	IV
WBGene00002144	2121	1291	3608518	I
WBGene00022610	946	443	3609218	IV
WBGene00018235	118	94	3610823	II
WBGene00002143	1224	731	3611942	I
WBGene00020700	780	155	3612158	V
WBGene00004765	880	503	3612951	III
WBGene00015957	108	72	3613353	X
WBGene00021650	221	95	3618889	I
WBGene00019799	142	117	3622314	II
WBGene00007859	1065	600	3627234	III
WBGene00020902	278	206	3631091	I
WBGene00019097	2566	1363	3633341	V
WBGene00007860	1533	1053	3636144	III
WBGene00020901	218	125	3637353	I
WBGene00020012	584	586	3639166	X
WBGene00000368	329	202	3641651	I
WBGene00016987	474	283	3645166	IV
WBGene00004727	1235	935	3646318	X
WBGene00008118	544	379	3648792	III
WBGene00008117	4187	2272	3650907	III
WBGene00008120	958	646	3652866	III
WBGene00020903	343	186	3655413	I
WBGene00008119	2324	1416	3657712	III
WBGene00004890	973	602	3666490	I
WBGene00015354	413	164	3668086	X
WBGene00044527	911	609	3668764	V
WBGene00015355	253	154	3670374	X
WBGene00004750	403	276	3671908	II
WBGene00021081	160	104	3673380	V
WBGene00006431	560	431	3674041	X
WBGene00017584	395	325	3675476	II
WBGene00017589	392	254	3677535	II
WBGene00001501	7627	5139	3680180	I
WBGene00004272	1907	1099	3682890	I
WBGene00017583	152	125	3683184	II
WBGene00003129	717	369	3683537	IV
WBGene00015356	668	736	3684212	X
WBGene00021079	108	70	3684662	V
WBGene00017025	1349	1006	3684781	I
WBGene00021078	798	499	3687106	V
WBGene00021363	987	513	3687307	IV
WBGene00015357	329	208	3690143	X
WBGene00017026	200	97	3690145	I
WBGene00003418	2956	2017	3694296	I
WBGene00021359	2039	1165	3694935	IV
WBGene00015293	330	230	3696903	X
WBGene00000885	1665	1138	3697821	III
WBGene00002042	614	416	3698102	I
WBGene00003962	5264	3362	3699739	III
WBGene00007573	2143	1320	3702260	III
WBGene00007574	797	626	3703564	III
WBGene00003025	1472	950	3704988	V
WBGene00006474	2146	1252	3705285	III
WBGene00017651	159	93	3706030	I
WBGene00007576	1211	724	3706886	III
WBGene00007581	1733	950	3709330	III
WBGene00020854	760	283	3712779	V
WBGene00003040	1878	1256	3713449	I
WBGene00007577	2045	1238	3713463	III
WBGene00021367	552	279	3715780	IV
WBGene00016710	181	120	3717261	II
WBGene00007579	1856	1163	3718652	III
WBGene00007578	1433	825	3719904	III
WBGene00021366	378	218	3722862	IV
WBGene00184990	815	546	3724222	III
WBGene00016707	210	97	3724225	II
WBGene00007580	4479	2626	3725075	III
WBGene00021365	1944	1319	3726164	IV
WBGene00045484	238	160	3726709	III
WBGene00001601	1153	633	3727027	I
WBGene00003739	265	136	3727574	X
WBGene00006454	179	82	3729281	X
WBGene00009372	3140	2001	3729640	III
WBGene00020467	539	474	3731352	I
WBGene00006408	1139	1031	3731894	X
WBGene00004147	5344	3335	3732860	I
WBGene00021370	555	325	3735470	IV
WBGene00009374	1176	657	3736602	III
WBGene00021371	235	183	3739520	IV
WBGene00020466	1140	854	3741451	I
WBGene00017402	202	154	3741884	II
WBGene00003479	877	481	3743576	V
WBGene00021369	1167	685	3744048	IV
WBGene00009375	187	105	3747521	III
WBGene00021372	254	189	3748210	IV
WBGene00002135	537	313	3748523	I
WBGene00021482	867	541	3749392	V
WBGene00020774	229	161	3753898	II
WBGene00002134	946	633	3755488	I
WBGene00021368	436	239	3756221	IV
WBGene00000498	1063	600	3757153	V
WBGene00006869	121	83	3761195	IV
WBGene00002267	1280	842	3771425	III
WBGene00018533	943	648	3772762	X
WBGene00019962	492	304	3774536	V
WBGene00000070	801	452	3774896	III
WBGene00019965	432	287	3777297	V
WBGene00018538	427	164	3778056	X
WBGene00004368	284	172	3778089	I
WBGene00016323	2407	1719	3782118	I
WBGene00019546	323	121	3784210	IV
WBGene00020771	138	106	3785557	II
WBGene00016321	1559	860	3786588	I
WBGene00018532	374	273	3788026	X
WBGene00004425	36969	17834	3788036	I
WBGene00004217	5177	3379	3789309	I
WBGene00003476	9239	6370	3789979	III
WBGene00016325	395	219	3794556	I
WBGene00021171	519	85	3795623	II
WBGene00003884	117	90	3796300	IV
WBGene00006751	1002	577	3798396	I
WBGene00001335	206	140	3800033	X
WBGene00019967	124	121	3800782	V
WBGene00019725	854	501	3800872	IV
WBGene00011974	138	68	3801901	III
WBGene00019724	476	364	3803581	IV
WBGene00006591	204	103	3804772	III
WBGene00019723	579	392	3805519	IV
WBGene00018806	640	439	3807171	II
WBGene00016326	3506	2172	3807456	I
WBGene00018024	1114	940	3807466	X
WBGene00019726	1931	1254	3807870	IV
WBGene00018804	137	134	3812282	II
WBGene00001086	1657	1173	3813018	III
WBGene00018803	3564	988	3816526	II
WBGene00001441	705	559	3816847	X
WBGene00003797	1754	988	3818074	I
WBGene00018808	579	375	3820145	II
WBGene00000137	506	411	3822403	III
WBGene00006833	4334	2209	3822883	I
WBGene00018765	1737	1029	3827219	I
WBGene00044423	427	307	3828239	I
WBGene00000287	195	151	3829493	IV
WBGene00018764	4092	2355	3829515	I
WBGene00018763	293	174	3834115	I
WBGene00007964	337	344	3835221	III
WBGene00014697	149	113	3837538	III
WBGene00020187	411	194	3838237	I
WBGene00020188	181	102	3839801	I
WBGene00022515	2121	1250	3840869	X
WBGene00007965	1229	769	3841265	III
WBGene00000441	300	158	3843367	X
WBGene00007966	457	278	3844893	III
WBGene00018540	174	85	3850127	V
WBGene00000264	680	443	3853102	III
WBGene00020192	575	210	3853847	I
WBGene00020189	470	255	3854161	I
WBGene00006970	110	83	3855843	IV
WBGene00020190	739	506	3859369	I
WBGene00001832	4856	3021	3862833	I
WBGene00007969	17628	7730	3864489	III
WBGene00020185	1657	892	3867541	I
WBGene00004414	71972	32368	3867854	III
WBGene00000764	448	283	3869214	I
WBGene00006575	777	484	3869590	III
WBGene00018145	1729	1296	3871831	IV
WBGene00020184	1279	703	3873444	I
WBGene00018146	1007	343	3875402	IV
WBGene00020193	507	343	3875969	I
WBGene00016837	3195	2051	3877063	I
WBGene00018569	189	104	3878533	X
WBGene00016836	2079	1543	3881816	I
WBGene00016838	140	181	3888240	I
WBGene00015903	143	115	3889161	V
WBGene00015905	142	90	3890964	V
WBGene00015899	1058	820	3892854	V
WBGene00001430	389	242	3898045	I
WBGene00016841	146	97	3901421	I
WBGene00014202	5386	3031	3903185	III
WBGene00006321	226	176	3904584	X
WBGene00018755	464	263	3908490	II
WBGene00003950	2870	1512	3908747	I
WBGene00003930	3423	2419	3908931	III
WBGene00044475	185	92	3909414	IV
WBGene00020625	1035	595	3909629	I
WBGene00014204	10012	6039	3916967	III
WBGene00020627	256	132	3917797	I
WBGene00014203	395	229	3918869	III
WBGene00018756	1479	906	3919720	II
WBGene00020628	2404	1525	3920206	I
WBGene00014205	728	533	3920628	III
WBGene00014206	294	81	3922207	III
WBGene00014207	604	609	3923781	III
WBGene00020629	1524	919	3925434	I
WBGene00020567	209	200	3931650	X
WBGene00021192	1373	710	3932178	II
WBGene00020652	1191	720	3932210	I
WBGene00003748	532	208	3933583	III
WBGene00021191	1419	766	3934447	II
WBGene00003072	3652	2813	3935272	I
WBGene00004184	469	214	3940130	X
WBGene00021583	208	202	3944816	IV
WBGene00020386	997	761	3950023	V
WBGene00004751	1283	793	3950377	II
WBGene00021579	541	280	3954030	IV
WBGene00015040	165	115	3955701	V
WBGene00009503	342	320	3956624	III
WBGene00015041	137	97	3958160	V
WBGene00003007	281	166	3958552	X
WBGene00011215	146	98	3960221	III
WBGene00021586	167	134	3960734	IV
WBGene00011214	1204	652	3962731	III
WBGene00003423	1122	621	3964648	III
WBGene00015043	531	528	3964797	V
WBGene00021587	327	242	3965246	IV
WBGene00018531	155	77	3968110	I
WBGene00015044	6018	3727	3968134	V
WBGene00015823	1690	769	3968140	X
WBGene00015824	123	89	3970457	X
WBGene00015045	257	265	3970702	V
WBGene00018548	511	236	3973349	IV
WBGene00003769	1566	927	3980055	V
WBGene00003768	220	119	3981980	V
WBGene00000197	3355	1637	3983183	I
WBGene00003767	1533	887	3984425	V
WBGene00003766	1515	859	3987900	V
WBGene00000779	4289	3214	3987940	I
WBGene00018547	127	184	3989102	IV
WBGene00003765	468	638	3989378	V
WBGene00021190	204	106	3993195	II
WBGene00017908	250	175	3995725	I
WBGene00007980	4995	2894	3999286	III
WBGene00006805	1807	1224	3999300	I
WBGene00019487	1288	510	4004914	II
WBGene00007982	1316	606	4006142	III
WBGene00019830	167	86	4008057	X
WBGene00019827	1546	789	4012219	X
WBGene00007983	175	181	4012336	III
WBGene00020930	2214	941	4014793	IV
WBGene00006537	16237	9016	4015910	III
WBGene00011367	1414	932	4020037	III
WBGene00011368	1497	982	4022166	III
WBGene00194692	182	75	4026490	III
WBGene00019488	158	66	4028576	II
WBGene00002038	2915	1360	4029095	III
WBGene00006820	2922	2565	4035702	I
WBGene00004135	850	587	4038884	II
WBGene00016788	122	176	4040409	V
WBGene00018064	1267	722	4042575	IV
WBGene00004467	2828	1450	4043055	II
WBGene00016781	3042	929	4046422	V
WBGene00003955	3823	2310	4047937	IV
WBGene00006951	260	146	4050006	IV
WBGene00004322	2078	1463	4052254	III
WBGene00021055	155	112	4056030	II
WBGene00020981	933	456	4056586	IV
WBGene00006811	343	185	4066633	III
WBGene00016434	644	385	4079814	IV
WBGene00016435	1894	813	4083603	IV
WBGene00002202	4362	2263	4083994	III
WBGene00016432	929	645	4086212	IV
WBGene00020007	2731	651	4091930	II
WBGene00004392	8838	5904	4093308	III
WBGene00016066	1043	420	4094160	I
WBGene00018189	108	99	4095040	V
WBGene00007270	3780	2456	4096896	III
WBGene00006476	297	243	4100785	II
WBGene00006701	987	669	4103020	IV
WBGene00017307	222	98	4110442	X
WBGene00000867	3064	1981	4114861	I
WBGene00006830	382	178	4115385	III
WBGene00019254	247	160	4116851	I
WBGene00018645	154	380	4119460	IV
WBGene00002696	3292	2229	4129565	I
WBGene00003647	132	110	4131889	V
WBGene00017085	7510	4679	4132362	I
WBGene00022745	597	231	4135155	X
WBGene00017087	409	290	4135239	I
WBGene00017088	2383	1304	4137161	I
WBGene00017084	1010	596	4139511	I
WBGene00017089	209	159	4142282	I
WBGene00021554	1829	1043	4144505	V
WBGene00077701	1101	508	4145315	I
WBGene00018969	352	211	4146339	II
WBGene00021558	149	146	4147550	V
WBGene00019932	1422	620	4148141	IV
WBGene00006410	794	494	4148648	X
WBGene00007630	784	468	4152054	III
WBGene00006448	1203	777	4153599	III
WBGene00219216	243	145	4154941	IV
WBGene00002137	1819	922	4159014	I
WBGene00021557	119	84	4160386	V
WBGene00007628	1701	1049	4161970	III
WBGene00002138	1976	1026	4162035	I
WBGene00004381	1175	830	4164274	III
[truncated: 8,293 more rows]
