# Supplementary material for: Widespread destabilization of C. elegans microRNAs by the E3 ubiquitin ligase EBAX-1
Source: bioRxiv preprint, doi:10.1101/2024.06.28.601170, version 1 (2024-06-29)
Supplement: Supplemental Table 4 [file 601170_file07.xlsx]

## Sheet: Raw DESeq2 output
Feature.ID	baseMean	log2(ebax/N2)	lfcSE	stat	pvalue	padj	N2_L1_1	N2_L1_2	CZ9907_L1_1	CZ9907_L1_2	N2_L1_1.norm	N2_L1_2.norm	CZ9907_L1_1.norm	CZ9907_L1_2.norm
WBGene00000001	474.267	0.124954	0.149811	0.834073	0.40424	0.957104	487	442	512	463	457.46	450.03	499.43	490.15
WBGene00000002	225.593	-0.0419417	0.200176	-0.209525	0.834039	0.979575	237	231	230	208	222.62	235.2	224.35	220.2
WBGene00000003	248.237	-0.260009	0.211528	-1.22919	0.219	0.800972	260	292	262	185	244.23	297.3	255.57	195.85
WBGene00000004	1185.19	-0.233369	0.114843	-2.03208	0.0421454	0.334958	1330	1289	1103	1042	1249.32	1312.42	1075.92	1103.11
WBGene00000005	17.3866	-0.439759	0.663024	-0.663263	0.507162	0.972757	22	19	14	15	20.67	19.35	13.66	15.88
WBGene00000006	1377.25	-0.246827	0.125037	-1.97403	0.0483789	0.36549	1448	1601	1346	1139	1360.16	1630.08	1312.95	1205.8
WBGene00000007	149.606	0.284312	0.239193	1.18863	0.234585	0.82223	141	135	174	150	132.45	137.45	169.73	158.8
WBGene00000008	3.36017	0.29467	1.71216	0.172105	0.863355	0.982229	1	5	0	7	0.94	5.09	0	7.41
WBGene00000009	86.383	-0.201263	0.313408	-0.642175	0.520759	0.972757	95	94	93	66	89.24	95.71	90.72	69.87
WBGene00000010	144.681	0.0878451	0.242451	0.36232	0.717113	0.972757	147	140	158	136	138.08	142.54	154.12	143.98
WBGene00000012	1.25079	2.01167	2.64977	0.759186	0.447741	0.972757	0	1	3	1	0	1.02	2.93	1.06
WBGene00000013	14.8667	0.0523799	0.718035	0.072949	0.941847	0.99961	17	13	18	12	15.97	13.24	17.56	12.7
WBGene00000014	0.243862	1.48086	4.9945	0.296499	0.766849	0.972757	0	0	1	0	0	0	0.98	0
WBGene00000015	26.9173	2.75828	0.650168	4.24242	2.21124e-05	0.000831518	3	11	45	47	2.82	11.2	43.9	49.76
WBGene00000016	418.33	0.271137	0.168265	1.61137	0.1071	0.574793	422	355	423	475	396.4	361.45	412.61	502.86
WBGene00000017	1460.22	0.114635	0.124342	0.921931	0.356565	0.938521	1527	1345	1402	1577	1434.37	1369.43	1367.58	1669.48
WBGene00000018	1057.41	0.0334747	0.117992	0.283704	0.776638	0.972757	1099	1039	1070	1035	1032.33	1057.87	1043.73	1095.7
WBGene00000019	2.58643	0.666126	1.88989	0.352469	0.724487	0.972757	1	3	0	6	0.94	3.05	0	6.35
WBGene00000020	1951.19	-0.33115	0.112923	-2.93252	0.00336225	0.0543922	2270	2176	1636	1758	2132.3	2215.53	1595.83	1861.1
WBGene00000022	756.402	-0.100942	0.132028	-0.764547	0.444541	0.972757	833	769	709	726	782.47	782.97	691.59	768.58
WBGene00000023	6.78498	-0.805464	1.16347	-0.692293	0.488753	0.972757	13	5	9	1	12.21	5.09	8.78	1.06
WBGene00000024	2.23063	-0.258159	1.79376	-0.143921	0.885563	0.984931	3	2	2	2	2.82	2.04	1.95	2.12
WBGene00000025	4.39315	-2.26717	1.44147	-1.57281	0.115762	0.598493	9	6	2	1	8.45	6.11	1.95	1.06
WBGene00000026	0	NA	NA	NA	NA	NA	0	0	0	0	0	0	0	0
WBGene00000027	0	NA	NA	NA	NA	NA	0	0	0	0	0	0	0	0
WBGene00000028	0.234835	-1.3705	4.99454	-0.274399	0.783778	0.972757	1	0	0	0	0.94	0	0	0
WBGene00000029	1.48728	-0.944994	2.21188	-0.427236	0.669207	0.972757	2	2	1	1	1.88	2.04	0.98	1.06
WBGene00000030	6.81914	0.808344	1.0773	0.750342	0.453048	0.972757	3	7	8	9	2.82	7.13	7.8	9.53
WBGene00000031	567.531	0.589095	0.327445	1.79907	0.072008	0.463761	449	476	545	786	421.76	484.65	531.62	832.1
WBGene00000032	0	NA	NA	NA	NA	NA	0	0	0	0	0	0	0	0
WBGene00000033	212.658	0.398344	0.215837	1.84558	0.0649535	0.43494	174	200	232	243	163.44	203.63	226.3	257.25
WBGene00000034	230.645	0.630991	0.228992	2.75551	0.00586001	0.0819868	175	194	234	314	164.38	197.52	228.25	332.41
WBGene00000035	363.631	0.0285254	0.170732	0.167077	0.867309	0.983018	358	377	360	362	336.28	383.85	351.16	383.23
WBGene00000036	1517.3	-0.138827	0.108135	-1.28383	0.1992	0.777515	1670	1583	1454	1389	1568.7	1611.76	1418.3	1470.46
WBGene00000037	666.73	-0.0170829	0.135728	-0.125862	0.899842	0.990492	692	679	660	644	650.02	691.33	643.8	681.77
WBGene00000038	110.442	-0.334768	0.275218	-1.21637	0.223842	0.807304	130	122	94	98	122.11	124.22	91.69	103.75
WBGene00000039	88.7653	-0.159937	0.303151	-0.527583	0.597789	0.972757	104	88	83	82	97.69	89.6	80.96	86.81
WBGene00000040	4253.59	-0.694307	0.0932328	-7.44703	9.54673e-14	1.95453e-11	5459	5292	3380	3024	5127.85	5388.14	3297.01	3201.35
WBGene00000041	7706.02	-0.19007	0.0908421	-2.09231	0.0364108	0.303166	8742	8068	7683	6521	8211.7	8214.57	7494.37	6903.43
WBGene00000042	117.907	0.515157	0.27085	1.902	0.0571717	0.40331	93	105	140	133	87.36	106.91	136.56	140.8
WBGene00000043	42.8352	0.277472	0.433198	0.640521	0.521834	0.972757	38	41	42	50	35.69	41.74	40.97	52.93
WBGene00000044	165.021	0.118152	0.235093	0.502575	0.615263	0.972757	185	140	169	169	173.78	142.54	164.85	178.91
WBGene00000045	17.8987	0.71783	0.674586	1.0641	0.287281	0.875997	19	9	24	20	17.85	9.16	23.41	21.17
WBGene00000046	85.1986	0.0972038	0.312163	0.311389	0.755505	0.972757	94	75	97	77	88.3	76.36	94.62	81.52
WBGene00000047	162.988	0.338242	0.237506	1.42414	0.154405	0.694443	156	139	207	153	146.54	141.53	201.92	161.97
WBGene00000048	43.8326	-0.136889	0.423719	-0.323066	0.746645	0.972757	50	44	39	43	46.97	44.8	38.04	45.52
WBGene00000049	25.797	0.381046	0.560097	0.680321	0.496301	0.972757	25	21	37	21	23.48	21.38	36.09	22.23
WBGene00000050	53.8504	0.452094	0.388308	1.16427	0.244315	0.834533	48	45	56	66	45.09	45.82	54.63	69.87
WBGene00000051	191.159	0.089978	0.228938	0.393024	0.694302	0.972757	226	155	195	193	212.29	157.82	190.21	204.32
WBGene00000053	38.7462	-0.0760446	0.469189	-0.162077	0.871245	0.983018	52	30	33	41	48.85	30.54	32.19	43.4
WBGene00000054	108.305	0.0706838	0.277836	0.254409	0.79918	0.973856	110	106	106	112	103.33	107.93	103.4	118.57
WBGene00000055	164.589	0.0352181	0.228789	0.153932	0.877663	0.983525	177	156	168	160	166.26	158.83	163.88	169.38
WBGene00000056	67.8944	0.0515165	0.345744	0.149002	0.881552	0.983744	64	72	70	66	60.12	73.31	68.28	69.87
WBGene00000057	72.7539	0.0325945	0.340126	0.0958307	0.923655	0.99961	88	60	75	70	82.66	61.09	73.16	74.11
WBGene00000058	243.606	0.00781915	0.194938	0.040111	0.968005	0.99961	270	228	247	234	253.62	232.14	240.94	247.72
WBGene00000059	138.927	-0.0967365	0.250543	-0.386107	0.699417	0.972757	141	152	132	132	132.45	154.76	128.76	139.74
WBGene00000060	85.3895	-0.305405	0.329737	-0.926207	0.354339	0.935997	82	110	88	63	77.03	112	85.84	66.69
WBGene00000061	154.345	0.35853	0.24013	1.49307	0.13542	0.648853	132	144	171	170	123.99	146.62	166.8	179.97
WBGene00000062	85.7051	0.561695	0.311136	1.8053	0.0710273	0.459694	79	63	100	101	74.21	64.14	97.54	106.92
WBGene00000063	3110.39	-0.0136932	0.115368	-0.118692	0.905519	0.992808	3384	3016	2837	3235	3178.72	3070.79	2767.35	3424.72
WBGene00000064	1706.2	0.131595	0.10971	1.19949	0.230339	0.815854	1813	1526	1878	1640	1703.02	1553.72	1831.89	1736.18
WBGene00000065	244.207	-0.171148	0.222551	-0.769028	0.441877	0.972441	278	252	284	172	261.14	256.58	277.03	182.09
WBGene00000066	21397.6	-0.302087	0.0907555	-3.32858	0.00087291	0.0180722	24619	23704	20640	17189	23125.6	24134.6	20133.2	18197.1
WBGene00000067	3669.73	0.193296	0.102006	1.89495	0.0580984	0.407696	3861	3164	4137	3585	3626.79	3221.48	4035.43	3795.25
WBGene00000068	1269.84	-0.392878	0.116418	-3.3747	0.000738955	0.0156942	1468	1478	1159	1006	1378.95	1504.85	1130.54	1065
WBGene00000069	284.714	-0.102333	0.181793	-0.562908	0.573498	0.972757	308	295	283	258	289.32	300.36	276.05	273.13
WBGene00000070	599.994	-0.251132	0.139373	-1.80187	0.0715652	0.461392	712	624	571	509	668.81	635.34	556.98	538.85
WBGene00000071	384.759	-0.218313	0.171173	-1.2754	0.202169	0.781515	398	446	373	328	373.86	454.1	363.84	347.24
WBGene00000072	453.369	-0.191529	0.153993	-1.24375	0.21359	0.789396	494	494	438	396	464.03	502.97	427.25	419.22
WBGene00000073	346.535	-0.136426	0.174209	-0.783118	0.433558	0.969624	417	328	345	306	391.7	333.96	336.53	323.95
WBGene00000074	805.906	0.266703	0.129119	2.06555	0.0388709	0.316079	814	686	916	819	764.62	698.46	893.51	867.03
WBGene00000075	176.066	-0.178692	0.235242	-0.759609	0.447488	0.972757	174	207	181	145	163.44	210.76	176.56	153.5
WBGene00000079	887.629	0.0924993	0.129955	0.711781	0.4766	0.972757	854	900	910	892	802.2	916.35	887.66	944.31
WBGene00000080	457.628	0.338384	0.153764	2.20067	0.0277594	0.251593	412	414	517	489	387.01	421.52	504.31	517.68
WBGene00000081	4417.06	-0.306053	0.0950386	-3.2203	0.00128056	0.0248197	5103	4886	4207	3586	4793.45	4974.76	4103.71	3796.31
WBGene00000082	193.445	-0.459465	0.238049	-1.93013	0.0535904	0.387694	208	248	142	177	195.38	252.51	138.51	187.38
WBGene00000083	1014.62	-0.83347	0.12021	-6.93345	4.10701e-12	6.30631e-10	1363	1296	766	672	1280.32	1319.54	747.19	711.41
WBGene00000084	236.311	0.0519047	0.198508	0.261474	0.793727	0.973263	262	214	247	227	246.11	217.89	240.94	240.31
WBGene00000085	106.693	-0.100609	0.292993	-0.343384	0.73131	0.972757	130	97	121	83	122.11	98.76	118.03	87.87
WBGene00000086	1374.81	0.00635955	0.118937	0.05347	0.957357	0.99961	1402	1401	1321	1386	1316.95	1426.45	1288.57	1467.28
WBGene00000088	576.269	-0.112577	0.146253	-0.769737	0.441456	0.972301	649	577	527	561	609.63	587.48	514.06	593.9
WBGene00000089	322.727	-0.0011725	0.174616	-0.00671472	0.994642	0.99961	331	329	340	296	310.92	334.98	331.65	313.36
WBGene00000090	404.428	-0.19859	0.161066	-1.23297	0.217587	0.798022	449	435	403	340	421.76	442.9	393.11	359.94
WBGene00000092	1171.16	-0.111899	0.113911	-0.982337	0.325934	0.914907	1295	1195	1161	1057	1216.44	1216.71	1132.5	1118.99
WBGene00000093	43.9175	-0.166987	0.431521	-0.386973	0.698776	0.972757	47	48	50	32	44.15	48.87	48.77	33.88
WBGene00000094	190.671	0.0823469	0.214541	0.383829	0.701105	0.972757	196	183	197	189	184.11	186.32	192.16	200.08
WBGene00000095	907.01	0.0619604	0.123913	0.500033	0.617052	0.972757	909	905	953	872	853.86	921.44	929.6	923.14
WBGene00000096	173.709	-0.28313	0.231947	-1.22066	0.222214	0.805005	210	181	179	131	197.26	184.29	174.61	138.68
WBGene00000097	856.21	-0.161993	0.14505	-1.11681	0.264077	0.855163	974	877	720	864	914.92	892.93	702.32	914.67
WBGene00000098	81.573	0.830486	0.319359	2.60048	0.00930941	0.114053	59	61	112	94	55.42	62.11	109.25	99.51
WBGene00000099	62.6259	0.478543	0.361993	1.32197	0.186179	0.757417	55	52	66	77	51.66	52.94	64.38	81.52
WBGene00000100	6819.15	-0.196113	0.0991693	-1.97756	0.0479789	0.363851	7496	7388	6097	6391	7041.28	7522.21	5947.31	6765.81
WBGene00000101	1516.35	-0.227447	0.114657	-1.98371	0.0472884	0.359679	1635	1705	1465	1289	1535.82	1735.97	1429.03	1364.59
WBGene00000102	1495.03	-0.291687	0.108361	-2.69182	0.00710641	0.0953004	1721	1645	1391	1258	1616.6	1674.88	1356.85	1331.78
WBGene00000103	696.092	-0.343827	0.137056	-2.50866	0.0121191	0.138185	851	744	592	614	799.38	757.52	577.47	650.01
WBGene00000105	4113.22	-0.299986	0.0943208	-3.18049	0.00147028	0.027786	4720	4562	3680	3575	4433.68	4644.87	3589.65	3784.66
WBGene00000106	654.937	0.044128	0.139381	0.3166	0.751547	0.972757	662	656	645	662	621.84	667.92	629.16	700.82
WBGene00000107	7504.35	-0.592543	0.0925506	-6.40237	1.52988e-10	1.83049e-08	9599	8871	6432	5379	9016.71	9032.15	6274.08	5694.46
WBGene00000108	1.00802	1.66932	2.84922	0.585886	0.557952	0.972757	1	0	1	2	0.94	0	0.98	2.12
WBGene00000109	1462.75	-0.330367	0.111265	-2.96918	0.00298593	0.0495219	1676	1655	1361	1194	1574.33	1685.07	1327.58	1264.02
WBGene00000110	2187.74	0.0254603	0.0998426	0.255004	0.79872	0.973856	2305	2133	2271	2077	2165.18	2171.75	2215.24	2198.81
WBGene00000111	259.994	-0.234679	0.193874	-1.21047	0.226098	0.810657	306	270	265	207	287.44	274.9	258.49	219.14
WBGene00000112	688.67	-0.348245	0.137088	-2.54031	0.0110755	0.129678	800	777	586	605	751.47	791.12	571.61	640.48
WBGene00000113	332.873	-0.125148	0.172947	-0.723621	0.469298	0.972757	387	325	321	306	363.52	330.9	313.12	323.95
WBGene00000114	64224.2	-0.237558	0.0928845	-2.55757	0.0105407	0.124582	70513	71466	57567	58323	66235.6	72764.3	56153.6	61743.4
WBGene00000115	380.521	-0.402053	0.174833	-2.29964	0.0214688	0.209304	434	451	370	278	407.67	459.19	360.92	294.3
WBGene00000116	293.47	0.144591	0.179663	0.80479	0.420941	0.964893	303	268	315	292	284.62	272.87	307.27	309.12
WBGene00000117	647.244	0.150926	0.136306	1.10726	0.268182	0.857793	662	594	676	664	621.84	604.79	659.4	702.94
WBGene00000118	1762.9	-0.0446425	0.111345	-0.40094	0.688465	0.972757	1795	1861	1827	1595	1686.11	1894.81	1782.14	1688.54
WBGene00000120	500.795	0.405654	0.156006	2.60025	0.00931564	0.114053	479	404	539	582	449.94	411.34	525.77	616.13
WBGene00000121	319.486	0.485166	0.173909	2.78976	0.00527467	0.0754589	284	261	380	354	266.77	265.74	370.67	374.76
WBGene00000122	1064.84	0.0559311	0.119168	0.469347	0.638822	0.972757	1092	1044	1153	988	1025.76	1062.97	1124.69	1045.94
WBGene00000123	2644.17	-0.190442	0.0968103	-1.96716	0.0491645	0.369765	3006	2763	2530	2335	2823.65	2813.19	2467.88	2471.94
WBGene00000133	19.6844	-1.53896	0.658593	-2.33674	0.0194528	0.195121	31	29	13	7	29.12	29.53	12.68	7.41
WBGene00000134	73.1431	0.0148025	0.330541	0.0447826	0.964281	0.99961	78	71	78	67	73.27	72.29	76.08	70.93
WBGene00000135	309.76	-0.0197539	0.183342	-0.107743	0.914199	0.996571	316	321	289	315	296.83	326.83	281.9	333.47
WBGene00000136	371.81	-0.095077	0.165041	-0.576081	0.56456	0.972757	421	366	378	331	395.46	372.65	368.72	350.41
WBGene00000137	177.758	-0.166796	0.225708	-0.738991	0.459913	0.972757	217	169	171	159	203.84	172.07	166.8	168.32
WBGene00000138	440.914	0.0264458	0.159738	0.165558	0.868505	0.983018	452	441	423	451	424.58	449.01	412.61	477.45
WBGene00000139	86.7312	-0.300644	0.305617	-0.983728	0.325249	0.913991	103	93	78	75	96.75	94.69	76.08	79.4
WBGene00000140	2622.02	0.0804724	0.276001	0.291565	0.770619	0.972757	2574	2632	2255	3014	2417.86	2679.81	2199.64	3190.76
WBGene00000142	384.272	0.287009	0.165244	1.73688	0.0824085	0.499905	346	361	436	396	325.01	367.56	425.3	419.22
WBGene00000143	269.684	0.153332	0.191647	0.800079	0.423665	0.966507	248	273	288	271	232.96	277.96	280.93	286.89
WBGene00000144	19.2902	0.303436	0.646138	0.469615	0.63863	0.972757	13	22	23	19	12.21	22.4	22.44	20.11
WBGene00000145	70.7804	-0.250285	0.345385	-0.724656	0.468663	0.972757	89	69	75	53	83.6	70.25	73.16	56.11
WBGene00000146	1952.19	0.119857	0.111286	1.07702	0.281473	0.870774	1920	1904	1955	2040	1803.53	1938.59	1907	2159.64
WBGene00000147	209.225	0.268073	0.217853	1.23052	0.218502	0.799785	178	209	247	204	167.2	212.8	240.94	215.96
WBGene00000148	275.048	-0.00563024	0.185089	-0.0304192	0.975733	0.99961	294	270	271	269	276.17	274.9	264.35	284.78
WBGene00000149	13651.5	-0.0938443	0.0927089	-1.01225	0.31142	0.896738	14800	14033	12771	13185	13902.2	14287.9	12457.5	13958.2
WBGene00000150	1204.28	-0.155114	0.113878	-1.3621	0.173165	0.732467	1374	1225	1184	1062	1290.65	1247.25	1154.93	1124.28
WBGene00000151	275.697	-0.0698789	0.195452	-0.357525	0.720699	0.972757	319	260	247	281	299.65	264.72	240.94	297.48
WBGene00000155	382.365	0.0028893	0.164368	0.0175782	0.985975	0.99961	422	361	406	349	396.4	367.56	396.03	369.47
WBGene00000156	793.053	0.0817243	0.126936	0.643825	0.519689	0.972757	832	746	830	776	781.53	759.55	809.62	821.51
WBGene00000157	172.936	0.533984	0.248809	2.14616	0.0318599	0.277172	151	138	169	231	141.84	140.51	164.85	244.55
WBGene00000158	948.549	0.0303607	0.122189	0.248473	0.803769	0.974938	1025	898	1007	883	962.82	914.31	982.28	934.78
WBGene00000159	309.191	0.00280635	0.175996	0.0159455	0.987278	0.99961	325	307	323	287	305.29	312.58	315.07	303.83
WBGene00000160	1499.08	0.11483	0.113176	1.01461	0.31029	0.896009	1562	1386	1512	1552	1467.25	1411.18	1474.88	1643.02
WBGene00000161	1425.09	0.0384594	0.110834	0.347002	0.72859	0.972757	1515	1364	1432	1409	1423.1	1388.78	1396.84	1491.63
WBGene00000162	653.032	-0.0562055	0.138703	-0.405224	0.685313	0.972757	744	621	636	624	698.87	632.28	620.38	660.6
WBGene00000163	1053.73	-0.0416516	0.118414	-0.351747	0.725028	0.972757	1111	1075	1085	962	1043.61	1094.53	1058.36	1018.42
WBGene00000164	314.222	0.313815	0.176954	1.77343	0.076157	0.478481	290	283	372	315	272.41	288.14	362.87	333.47
WBGene00000165	229.652	0.0555218	0.198069	0.280316	0.779235	0.972757	240	221	239	222	225.44	225.01	233.13	235.02
WBGene00000166	260.408	-0.019025	0.196203	-0.0969659	0.922753	0.99961	260	275	245	263	244.23	280	238.98	278.42
WBGene00000168	34.8761	0.548748	0.47732	1.14965	0.25029	0.842961	30	28	48	34	28.18	28.51	46.82	35.99
WBGene00000169	1517.79	-0.567848	0.138293	-4.10613	4.02346e-05	0.00136783	1931	1780	1444	979	1813.86	1812.34	1408.55	1036.41
WBGene00000170	12630.7	-0.0704044	0.090576	-0.777296	0.436984	0.970743	13672	12802	12021	12204	12842.6	13034.6	11725.9	12919.7
WBGene00000171	92.2669	0.723295	0.302927	2.38769	0.0169547	0.176302	67	75	114	112	62.94	76.36	111.2	118.57
WBGene00000172	690.299	0.469795	0.135222	3.47424	0.000512302	0.0116683	616	569	860	722	578.63	579.34	838.89	764.34
WBGene00000173	28.3618	0.818098	0.528749	1.54723	0.121807	0.616864	22	20	33	38	20.67	20.36	32.19	40.23
WBGene00000174	95.9676	-0.0797962	0.299419	-0.266504	0.789851	0.973176	92	109	100	84	86.42	110.98	97.54	88.93
WBGene00000175	4340.56	-0.332635	0.095844	-3.47059	0.000519325	0.0117701	5364	4556	4019	3556	5038.61	4638.77	3920.33	3764.55
WBGene00000176	182.257	-0.124887	0.219459	-0.569069	0.569309	0.972757	201	188	172	171	188.81	191.42	167.78	181.03
WBGene00000177	114.984	-0.106788	0.277738	-0.384491	0.700614	0.972757	139	106	125	94	130.57	107.93	121.93	99.51
WBGene00000178	686.333	0.206758	0.148015	1.39687	0.162453	0.707816	726	582	823	631	681.96	592.57	802.79	668.01
WBGene00000179	346.772	-0.204463	0.17426	-1.17332	0.240668	0.831577	422	340	346	290	396.4	346.18	337.5	307.01
WBGene00000180	332.476	-0.00512323	0.173171	-0.0295848	0.976398	0.99961	373	310	342	312	350.37	315.63	333.6	330.3
WBGene00000181	1060.09	-0.0925033	0.117667	-0.786144	0.431783	0.968477	1173	1067	1076	947	1101.84	1086.38	1049.58	1002.54
WBGene00000182	1228.64	0.225521	0.113151	1.9931	0.0462507	0.354853	1185	1132	1347	1261	1113.12	1152.56	1313.93	1334.95
WBGene00000183	2288.19	0.280804	0.10157	2.76463	0.00569872	0.0801239	2176	2051	2489	2449	2044	2088.26	2427.89	2592.62
WBGene00000184	320.753	-0.211316	0.174624	-1.21012	0.226231	0.81068	375	330	295	290	352.25	335.99	287.76	307.01
WBGene00000185	9.32464	-1.62889	0.945329	-1.72309	0.0848716	0.508194	17	12	5	4	15.97	12.22	4.88	4.23
WBGene00000186	1056.06	0.0245868	0.117934	0.208479	0.834855	0.979679	1086	1055	1095	1003	1020.12	1074.17	1068.12	1061.82
WBGene00000187	241.382	0.0716287	0.198522	0.36081	0.718241	0.972757	256	226	235	251	240.47	230.11	229.23	265.72
WBGene00000188	188.699	-0.445858	0.231086	-1.9294	0.0536809	0.387892	199	244	156	158	186.93	248.43	152.17	167.27
WBGene00000189	48.403	0.249236	0.414677	0.601035	0.547817	0.972757	40	50	47	56	37.57	50.91	45.85	59.28
WBGene00000190	490.825	1.57595	0.182014	8.65837	4.78545e-18	1.49452e-15	296	211	853	603	278.04	214.83	832.06	638.36
WBGene00000192	816.785	0.314142	0.15252	2.05968	0.039429	0.318788	735	753	1059	734	690.41	766.68	1033	777.05
WBGene00000193	68.0941	0.267104	0.348512	0.766411	0.443432	0.972663	59	67	70	76	55.42	68.22	68.28	80.46
WBGene00000195	464.01	0.26121	0.160294	1.62956	0.103194	0.56591	454	410	470	523	426.46	417.45	458.46	553.67
WBGene00000196	298.305	0.111806	0.182755	0.61178	0.540683	0.972757	304	283	341	271	285.56	288.14	332.63	286.89
WBGene00000197	1795.03	-0.00602538	0.106532	-0.0565593	0.954896	0.99961	1850	1827	1874	1657	1737.78	1860.19	1827.99	1754.18
WBGene00000198	1249.84	-0.148687	0.11401	-1.30415	0.192181	0.766749	1385	1304	1255	1083	1300.98	1327.69	1224.19	1146.51
WBGene00000199	671.113	0.180265	0.147427	1.22274	0.221427	0.804738	652	635	808	602	612.45	646.54	788.16	637.3
WBGene00000200	659.068	-0.269636	0.143387	-1.88047	0.0600438	0.415615	753	721	666	515	707.32	734.1	649.65	545.2
WBGene00000201	919.918	-0.112994	0.122746	-0.92055	0.357286	0.938783	1008	948	933	810	946.85	965.22	910.09	857.5
WBGene00000202	107.831	-0.0788558	0.277437	-0.28423	0.776234	0.972757	121	106	113	94	113.66	107.93	110.23	99.51
WBGene00000203	253.202	0.18673	0.191856	0.97328	0.330414	0.918255	241	243	278	253	226.38	247.41	271.17	267.84
WBGene00000204	530.141	0.108526	0.152047	0.713764	0.475373	0.972757	579	468	595	491	543.88	476.5	580.39	519.8
WBGene00000205	111.794	-0.332173	0.271878	-1.22178	0.221792	0.805005	132	123	102	93	123.99	125.23	99.5	98.45
WBGene00000206	159.673	0.154002	0.25077	0.614118	0.539137	0.972757	182	129	194	139	170.96	131.34	189.24	147.15
WBGene00000207	10659.4	-0.270105	0.0881039	-3.06576	0.00217119	0.0380651	12317	11529	9576	9435	11569.8	11738.4	9340.89	9988.33
WBGene00000208	477.244	-0.198954	0.153971	-1.29215	0.196304	0.773545	568	478	477	400	533.54	486.68	465.29	423.46
WBGene00000209	229.969	-0.0134826	0.210067	-0.0641822	0.948825	0.99961	244	229	265	188	229.2	233.16	258.49	199.03
WBGene00000210	1848.17	-0.101446	0.126503	-0.801925	0.422596	0.965934	2182	1744	1645	1854	2049.64	1775.68	1604.61	1962.73
WBGene00000211	225.428	-0.404157	0.203837	-1.98275	0.0473959	0.360279	263	262	211	172	247.05	266.76	205.82	182.09
WBGene00000212	925.292	-0.640607	0.128833	-4.97239	6.61337e-07	3.77269e-05	1158	1146	694	727	1087.75	1166.82	676.96	769.64
WBGene00000213	177.481	-0.819835	0.233596	-3.50962	0.000448745	0.0104766	219	243	120	132	205.72	247.41	117.05	139.74
WBGene00000214	117717	-0.381498	0.0883887	-4.31614	1.58781e-05	0.000622603	137165	135084	100648	100420	128844	137538	98176.9	106309
WBGene00000215	4783.38	-0.239513	0.0976382	-2.45306	0.0141646	0.154986	5771	4850	4652	4002	5420.92	4938.11	4537.78	4236.7
WBGene00000216	41776.8	-0.527758	0.0831095	-6.35015	2.15103e-10	2.50854e-08	51410	49478	35200	32214	48291.4	50376.8	34335.8	34103.2
WBGene00000217	2940.32	-0.277162	0.10388	-2.66809	0.00762839	0.0996885	3287	3297	2860	2387	3087.61	3356.89	2789.78	2526.99
WBGene00000218	23483.3	-0.397909	0.0836618	-4.75615	1.97316e-06	0.000100158	28686	25985	21122	18823	26945.9	26457	20603.4	19926.9
WBGene00000219	149568	-0.479365	0.0847205	-5.6582	1.52969e-08	1.23623e-06	178856	177156	127482	118584	168006	180374	124352	125538
WBGene00000220	95.7829	-0.119966	0.29215	-0.410633	0.681342	0.972757	103	101	97	84	96.75	102.83	94.62	88.93
WBGene00000221	2741.83	-0.0297146	0.0970263	-0.306253	0.759412	0.972757	2902	2764	2755	2588	2725.96	2814.21	2687.36	2739.78
WBGene00000222	625.72	0.0814956	0.142041	0.573748	0.566138	0.972757	644	600	614	650	604.93	610.9	598.93	688.12
WBGene00000223	3777.94	-0.163824	0.102751	-1.59438	0.110851	0.584754	3958	4191	3704	3319	3717.9	4267.13	3613.06	3513.65
WBGene00000224	2529.83	-0.0444861	0.101277	-0.439252	0.660479	0.972757	2783	2478	2454	2445	2614.18	2523.02	2393.75	2588.39
WBGene00000225	857.536	-0.0717835	0.125023	-0.574161	0.565859	0.972757	936	863	883	766	879.22	878.68	861.32	810.92
WBGene00000226	919.945	-0.257032	0.136448	-1.88373	0.0596014	0.413952	973	1070	808	839	913.98	1089.44	788.16	888.2
WBGene00000227	663.494	0.00443146	0.141326	0.0313562	0.974985	0.99961	751	608	651	656	705.44	619.05	635.02	694.47
WBGene00000228	1641.13	-0.358557	0.106901	-3.35409	0.000796273	0.0167681	2013	1765	1486	1348	1890.89	1797.06	1449.52	1427.06
WBGene00000229	29534.6	-0.458104	0.0900334	-5.08816	3.61561e-07	2.17716e-05	35995	33942	26859	22263	33811.5	34558.6	26199.6	23568.6
WBGene00000230	7784.92	-0.309438	0.0871122	-3.55217	0.000382065	0.00911908	9137	8496	7021	6667	8582.74	8650.34	6848.62	7057.99
WBGene00000231	2648.89	-0.0733279	0.104235	-0.703486	0.481753	0.972757	2867	2690	2487	2586	2693.08	2738.87	2425.94	2737.66
WBGene00000232	830.442	-0.0262182	0.126535	-0.207201	0.835853	0.979679	862	851	847	774	809.71	866.46	826.2	819.39
WBGene00000233	649.14	-0.590579	0.140538	-4.20228	2.64242e-05	0.000969906	824	772	495	523	774.02	786.02	482.85	553.67
WBGene00000235	241.123	0.625508	0.204242	3.06258	0.00219436	0.0382529	202	186	268	306	189.75	189.38	261.42	323.95
WBGene00000236	194.904	-0.328293	0.21438	-1.53136	0.12568	0.627563	228	216	186	155	214.17	219.92	181.43	164.09
WBGene00000237	962.53	0.106832	0.126083	0.847315	0.39682	0.955916	947	947	970	992	889.55	964.2	946.18	1050.18
WBGene00000238	496.924	0.222834	0.150686	1.4788	0.139195	0.658677	509	431	529	524	478.12	438.83	516.01	554.73
WBGene00000239	230.265	0.00139013	0.201394	0.0069025	0.994493	0.99961	229	241	241	213	215.11	245.38	235.08	225.49
WBGene00000240	3215.17	0.069046	0.0963574	0.716561	0.473645	0.972757	3369	3056	3273	3204	3164.63	3111.52	3192.64	3391.9
WBGene00000241	136.97	-0.204174	0.251413	-0.812104	0.416732	0.96313	168	133	133	118	157.81	135.42	129.73	124.92
WBGene00000242	162.022	0.360526	0.232383	1.55143	0.120799	0.614024	160	131	188	171	150.29	133.38	183.38	181.03
WBGene00000244	322.597	0.236391	0.173676	1.36111	0.17348	0.732648	310	296	367	321	291.19	301.38	357.99	339.83
WBGene00000245	494.242	-0.572888	0.188493	-3.0393	0.00237125	0.0409108	610	599	495	294	573	609.88	482.85	311.24
WBGene00000246	342.776	0.131457	0.175554	0.748811	0.453971	0.972757	323	345	385	322	303.41	351.27	375.55	340.88
WBGene00000247	365.095	-0.253256	0.167083	-1.51575	0.129584	0.636383	442	372	337	319	415.19	378.76	328.73	337.71
WBGene00000248	560.56	-0.0171334	0.1467	-0.116791	0.907025	0.993548	581	572	606	494	545.76	582.39	591.12	522.97
WBGene00000249	220.43	0.0998803	0.204815	0.487661	0.62579	0.972757	217	218	246	204	203.84	221.96	239.96	215.96
WBGene00000250	30.5697	0.646147	0.51569	1.25298	0.210215	0.786481	28	21	45	29	26.3	21.38	43.9	30.7
WBGene00000251	0.243862	1.48086	4.9945	0.296499	0.766849	0.972757	0	0	1	0	0	0	0.98	0
WBGene00000252	3.72747	0.672284	1.45326	0.462605	0.643647	0.972757	5	1	4	5	4.7	1.02	3.9	5.29
WBGene00000253	628.994	-0.0334773	0.158426	-0.211312	0.832644	0.979316	652	648	549	669	612.45	659.77	535.52	708.23
WBGene00000254	2767.86	0.0579198	0.0981934	0.589855	0.555288	0.972757	2859	2690	2810	2745	2685.57	2738.87	2741.01	2905.98
WBGene00000255	1.21193	-0.55589	2.53898	-0.218942	0.826695	0.979306	2	1	2	0	1.88	1.02	1.95	0
WBGene00000256	0.773745	-0.961715	3.35635	-0.286536	0.774468	0.972757	0	2	0	1	0	2.04	0	1.06
WBGene00000257	245.917	0.204142	0.192994	1.05776	0.290163	0.8785	246	222	275	244	231.08	226.03	268.25	258.31
WBGene00000259	829.724	-0.104659	0.125565	-0.833504	0.404561	0.957104	903	856	833	743	848.22	871.55	812.55	786.57
WBGene00000262	116.099	-0.145058	0.268923	-0.539403	0.589609	0.972757	122	127	111	106	114.6	129.31	108.27	112.22
WBGene00000263	2380.57	-0.285656	0.106296	-2.68736	0.00720186	0.0962303	2956	2410	2175	2050	2776.69	2453.78	2121.6	2170.22
WBGene00000264	32.3165	-0.0396807	0.554421	-0.0715714	0.942943	0.99961	21	45	23	39	19.73	45.82	22.44	41.29
WBGene00000265	54.2869	0.58082	0.416729	1.39376	0.16339	0.710221	60	30	76	53	56.36	30.54	74.13	56.11
WBGene00000266	571.643	0.425784	0.157005	2.71191	0.00668959	0.0905675	520	479	753	544	488.46	487.7	734.51	575.9
WBGene00000267	204.401	0.45496	0.208988	2.17696	0.0294834	0.262759	184	169	248	218	172.84	172.07	241.91	230.78
WBGene00000268	846.764	0.0912601	0.126161	0.723361	0.469458	0.972757	866	812	928	795	813.47	826.75	905.22	841.62
WBGene00000269	261.63	-0.0905518	0.189079	-0.47891	0.632003	0.972757	298	255	256	243	279.92	259.63	249.71	257.25
WBGene00000270	78.3193	-0.113214	0.329049	-0.344064	0.730798	0.972757	91	76	88	61	85.48	77.38	85.84	64.58
WBGene00000271	466.977	0.226626	0.15426	1.46912	0.1418	0.664161	431	448	520	472	404.85	456.14	507.23	499.68
WBGene00000272	6.4453	0.0487216	1.07533	0.0453085	0.963861	0.99961	7	6	8	5	6.58	6.11	7.8	5.29
WBGene00000273	36477.7	-0.458557	0.0911604	-5.03022	4.89917e-07	2.8477e-05	45628	40850	29701	30687	42860.2	41592.1	28971.8	32486.7
WBGene00000274	346.413	0.0968843	0.168994	0.573299	0.566442	0.972757	352	333	378	328	330.65	339.05	368.72	347.24
WBGene00000275	201.705	0.628855	0.211399	2.97474	0.00293239	0.0487215	164	160	258	225	154.05	162.91	251.67	238.2
WBGene00000276	5477.03	-0.167427	0.0913632	-1.83254	0.0668712	0.442545	6300	5570	5415	4758	5917.83	5671.19	5282.05	5037.04
WBGene00000277	13461.4	-0.308256	0.0977658	-3.15301	0.00161597	0.0301375	15550	14910	11423	12200	14606.7	15180.9	11142.5	12915.5
WBGene00000279	139.858	-0.253418	0.246688	-1.02728	0.304286	0.891705	158	153	126	125	148.42	155.78	122.91	132.33
WBGene00000280	247.572	0.0500265	0.195181	0.256308	0.797713	0.973856	262	236	242	253	246.11	240.29	236.06	267.84
WBGene00000281	678.575	-0.472535	0.135144	-3.49653	0.000471345	0.0108563	809	803	575	544	759.93	817.59	560.88	575.9
WBGene00000282	906.03	-0.317451	0.122061	-2.60075	0.00930197	0.114037	1062	995	826	763	997.58	1013.08	805.72	807.75
WBGene00000283	454.146	0.0308644	0.156184	0.197615	0.843346	0.980606	496	425	495	411	465.91	432.72	482.85	435.1
WBGene00000284	598.562	-0.192716	0.142309	-1.3542	0.175672	0.737138	641	663	570	530	602.12	675.04	556.01	561.08
WBGene00000285	306.366	0.144015	0.191147	0.753423	0.451196	0.972757	331	266	292	339	310.92	270.83	284.83	358.88
WBGene00000286	767.004	-0.0728025	0.128782	-0.565314	0.57186	0.972757	829	780	785	689	778.71	794.17	765.73	729.41
WBGene00000287	247.349	0.529308	0.193809	2.73108	0.00631276	0.0868821	210	204	292	283	197.26	207.71	284.83	299.6
WBGene00000288	735.017	-0.560201	0.130059	-4.3073	1.65261e-05	0.000645149	935	858	606	564	878.28	873.59	591.12	597.08
WBGene00000289	1442.04	-0.0378397	0.11699	-0.323444	0.746359	0.972757	1444	1538	1461	1342	1356.41	1565.94	1425.13	1420.7
WBGene00000292	750.065	0.114461	0.130446	0.877452	0.380241	0.948684	760	714	827	711	713.9	726.97	806.7	752.7
WBGene00000293	2557.58	-0.189169	0.0975693	-1.93881	0.0525242	0.383443	2869	2706	2451	2257	2694.96	2755.16	2390.82	2389.36
WBGene00000294	2062.86	0.180259	0.106279	1.69609	0.0898684	0.525716	2041	1916	2130	2178	1917.19	1950.81	2077.7	2305.73
WBGene00000295	223.212	0.106139	0.204262	0.519621	0.603328	0.972757	226	214	254	203	212.29	217.89	247.76	214.91
WBGene00000296	56.6751	0.758753	0.402213	1.88644	0.0592351	0.412211	57	30	80	61	53.54	30.54	78.04	64.58
WBGene00000298	484.546	-0.27175	0.150153	-1.80982	0.0703235	0.456261	564	521	467	399	529.79	530.46	455.53	422.4
WBGene00000301	485.108	0.0704892	0.150118	0.469558	0.638671	0.972757	493	475	526	454	463.09	483.63	513.09	480.63
WBGene00000302	289.577	0.268646	0.185122	1.45118	0.146729	0.676074	300	239	317	306	281.8	243.34	309.22	323.95
WBGene00000366	10314.3	-0.22047	0.108161	-2.03835	0.0415146	0.331864	11195	11477	8866	9831	10515.9	11685.5	8648.32	10407.5
WBGene00000367	1633.14	-0.247995	0.106239	-2.3343	0.0195799	0.19584	1887	1742	1502	1437	1772.53	1773.65	1465.12	1521.27
WBGene00000368	1107.14	0.157138	0.1328	1.18327	0.236701	0.826032	1070	1069	1073	1217	1005.09	1088.42	1046.66	1288.37
WBGene00000369	502.429	0.0495923	0.146774	0.337882	0.735452	0.972757	530	481	528	479	497.85	489.74	515.04	507.09
WBGene00000370	2403.64	-0.149793	0.103272	-1.45047	0.146929	0.676489	2766	2414	2240	2242	2598.21	2457.85	2185	2373.48
WBGene00000371	4921.52	-0.175644	0.234594	-0.748715	0.454029	0.972757	5853	4855	4011	5037	5497.95	4943.2	3912.52	5332.4
WBGene00000372	24.3353	-0.66074	0.567282	-1.16475	0.244122	0.83414	32	29	17	20	30.06	29.53	16.58	21.17
WBGene00000373	212.913	0.320851	0.20824	1.54078	0.123371	0.620764	207	181	258	209	194.44	184.29	251.67	221.26
WBGene00000375	132.46	-0.0681273	0.261276	-0.260748	0.794287	0.973495	149	129	150	106	139.96	131.34	146.32	112.22
WBGene00000376	1501.1	-0.0993778	0.11069	-0.897801	0.369291	0.943195	1583	1590	1489	1366	1486.97	1618.88	1452.44	1446.11
WBGene00000377	3656.64	-0.223016	0.0927842	-2.40359	0.0162348	0.171822	4226	3838	3470	3178	3969.65	3907.72	3384.8	3364.38
WBGene00000378	2731.11	-0.203878	0.097185	-2.09784	0.0359193	0.300431	3121	2864	2653	2351	2931.68	2916.03	2587.86	2488.88
WBGene00000379	4161.65	-0.245354	0.0916263	-2.67777	0.00741147	0.0980357	4749	4487	3891	3610	4460.92	4568.51	3795.47	3821.71
WBGene00000380	4217.33	-0.22888	0.101992	-2.2441	0.0248262	0.232207	4797	4515	4262	3409	4506.01	4597.02	4157.36	3608.92
WBGene00000381	2396.85	-0.415765	0.109547	-3.79531	0.000147461	0.00415199	2807	2793	2247	1809	2636.72	2843.74	2191.83	1915.09
WBGene00000382	168.917	-0.105039	0.227188	-0.462342	0.643836	0.972757	181	177	173	148	170.02	180.22	168.75	156.68
WBGene00000383	4071.94	0.0803358	0.0929822	0.863991	0.387593	0.952323	4188	3912	4186	4050	3933.95	3983.07	4083.23	4287.52
WBGene00000386	217.41	0.103658	0.217909	0.475695	0.634292	0.972757	234	196	263	183	219.81	199.56	256.54	193.73
WBGene00000387	127.118	0.0882762	0.256314	0.344406	0.730541	0.972757	128	124	134	124	120.24	126.25	130.71	131.27
WBGene00000388	31.235	1.33486	0.555174	2.4044	0.0161992	0.171558	13	23	59	30	12.21	23.42	57.55	31.76
WBGene00000389	0	NA	NA	NA	NA	NA	0	0	0	0	0	0	0	0
WBGene00000390	712.618	0.233899	0.139428	1.67756	0.0934326	0.537764	645	692	818	701	605.87	704.57	797.92	742.11
WBGene00000391	566.104	-0.212342	0.160892	-1.31978	0.186908	0.757749	615	626	468	560	577.69	637.37	456.51	592.84
WBGene00000392	69.9365	0.00643294	0.358244	0.0179569	0.985673	0.99961	79	64	56	81	74.21	65.16	54.63	85.75
WBGene00000393	660.095	0.0297929	0.137016	0.217441	0.827865	0.979316	668	667	663	649	627.48	679.12	646.72	687.06
WBGene00000395	424.249	-0.0877266	0.161983	-0.541579	0.588108	0.972757	473	422	389	419	444.31	429.67	379.45	443.57
WBGene00000396	2070.82	-0.195861	0.108606	-1.80341	0.0713236	0.460803	2228	2288	1909	1888	2092.85	2329.56	1862.13	1998.72
WBGene00000397	106.639	0.0534048	0.284485	0.187724	0.851093	0.981026	110	104	98	115	103.33	105.89	95.59	121.74
WBGene00000399	6.83773	1.85512	1.1218	1.6537	0.0981887	0.553122	2	4	10	11	1.88	4.07	9.75	11.65
WBGene00000401	144.781	0.0785629	0.252152	0.31157	0.755367	0.972757	133	154	141	151	124.93	156.8	137.54	159.86
WBGene00000402	5.51773	0.310338	1.16343	0.266744	0.789666	0.973176	4	6	6	6	3.76	6.11	5.85	6.35
WBGene00000403	8548.37	-0.0838523	0.0959532	-0.873887	0.38218	0.949172	9090	8893	8020	8291	8538.59	9054.55	7823.09	8777.24
WBGene00000405	147.357	0.503114	0.243008	2.07036	0.0384189	0.314346	136	114	185	156	127.75	116.07	180.46	165.15
WBGene00000406	100.044	0.29206	0.285928	1.02145	0.307042	0.893882	94	90	114	103	88.3	91.63	111.2	109.04
WBGene00000407	278.574	-0.00266643	0.191109	-0.0139524	0.988868	0.99961	271	298	299	250	254.56	303.41	291.66	264.66
WBGene00000408	281.513	0.239045	0.186936	1.27876	0.200983	0.780465	279	250	335	267	262.08	254.54	326.78	282.66
WBGene00000409	613.959	0.137193	0.138653	0.989469	0.322434	0.911362	608	588	677	591	571.12	598.68	660.38	625.66
WBGene00000410	347.033	0.127474	0.171073	0.745146	0.456184	0.972757	370	310	359	354	347.56	315.63	350.19	374.76
WBGene00000411	239.733	0.69728	0.203498	3.42647	0.000611485	0.0135423	174	199	305	279	163.44	202.62	297.51	295.36
WBGene00000412	34.0409	-0.357177	0.515565	-0.692786	0.488444	0.972757	39	39	19	39	36.63	39.71	18.53	41.29
WBGene00000413	99.8413	0.467487	0.290884	1.60712	0.108027	0.57629	97	75	114	114	91.12	76.36	111.2	120.69
WBGene00000414	916.295	-0.0242539	0.136436	-0.177767	0.858906	0.982079	1002	891	1029	768	941.22	907.19	1003.74	813.04
WBGene00000415	1550.2	-0.132761	0.108958	-1.21846	0.223049	0.806812	1760	1561	1472	1438	1653.24	1589.36	1435.86	1522.33
WBGene00000416	189.492	-0.0523556	0.223731	-0.234011	0.814976	0.977815	210	185	169	196	197.26	188.36	164.85	207.49
WBGene00000417	46.852	0.0402386	0.426742	0.0942925	0.924877	0.99961	40	54	56	38	37.57	54.98	54.63	40.23
WBGene00000418	185.333	0.229151	0.221389	1.03506	0.30064	0.888153	191	159	218	177	179.41	161.89	212.65	187.38
WBGene00000419	992.741	-0.217998	0.119064	-1.83092	0.0671122	0.442545	1149	1037	940	868	1079.3	1055.84	916.92	918.9
WBGene00000420	479.192	0.109692	0.149439	0.734031	0.46293	0.972757	483	460	514	466	453.7	468.36	501.38	493.33
WBGene00000421	2862.51	-0.230291	0.0961576	-2.39493	0.0166234	0.174035	3244	3078	2710	2480	3047.21	3133.92	2643.46	2625.44
WBGene00000422	11.553	0.550245	0.822991	0.668592	0.503756	0.972757	7	12	14	13	6.58	12.22	13.66	13.76
WBGene00000423	195.86	0.0445332	0.220238	0.202205	0.839757	0.980079	193	201	223	170	181.29	204.65	217.52	179.97
WBGene00000424	301.558	0.262565	0.184593	1.4224	0.154912	0.69484	286	275	367	283	268.65	280	357.99	299.6
WBGene00000425	201.012	-0.153496	0.209903	-0.731269	0.464615	0.972757	221	212	197	178	207.59	215.85	192.16	188.44
WBGene00000426	469.862	0.205037	0.152724	1.34253	0.179425	0.744532	486	409	525	467	456.52	416.43	512.11	494.39
WBGene00000427	0	NA	NA	NA	NA	NA	0	0	0	0	0	0	0	0
WBGene00000428	10.5173	0.330829	0.846718	0.390719	0.696005	0.972757	9	10	11	12	8.45	10.18	10.73	12.7
WBGene00000429	64.8306	0.0648244	0.358829	0.180656	0.856638	0.982051	73	57	59	71	68.57	58.04	57.55	75.16
WBGene00000430	7.63643	-0.0525938	1.01326	-0.0519053	0.958604	0.99961	9	7	11	4	8.45	7.13	10.73	4.23
WBGene00000431	203.103	0.150876	0.213456	0.706824	0.479676	0.972757	192	201	207	213	180.35	204.65	201.92	225.49
WBGene00000432	0.234835	-1.3705	4.99454	-0.274399	0.783778	0.972757	1	0	0	0	0.94	0	0	0
WBGene00000433	72.2109	-0.103821	0.344898	-0.30102	0.763399	0.972757	93	61	68	69	87.36	62.11	66.33	73.05
WBGene00000434	14.4706	0.266675	0.729263	0.365677	0.714606	0.972757	16	11	14	17	15.03	11.2	13.66	18
WBGene00000435	88.4743	-0.155548	0.315383	-0.493202	0.62187	0.972757	89	101	74	90	83.6	102.83	72.18	95.28
WBGene00000436	0.478697	0.0550833	4.07652	0.0135123	0.989219	0.99961	1	0	1	0	0.94	0	0.98	0
WBGene00000437	471.075	0.196772	0.170705	1.1527	0.249032	0.841649	437	459	449	537	410.49	467.34	437.98	568.49
WBGene00000438	227.497	0.0903984	0.202414	0.446603	0.655162	0.972757	236	215	224	237	221.68	218.91	218.5	250.9
WBGene00000439	61.9743	0.203587	0.366272	0.555836	0.578323	0.972757	64	54	58	72	60.12	54.98	56.58	76.22
WBGene00000440	49.3044	0.0244024	0.398075	0.061301	0.951119	0.99961	51	49	52	46	47.91	49.89	50.72	48.7
WBGene00000441	714.909	0.0174097	0.131952	0.13194	0.895032	0.989232	753	701	714	701	707.32	713.73	696.47	742.11
WBGene00000442	43.6533	0.224563	0.434803	0.516472	0.605525	0.972757	36	46	54	39	33.82	46.84	52.67	41.29
WBGene00000443	831.479	-0.0175224	0.125351	-0.139787	0.888829	0.986362	887	825	863	766	833.19	839.99	841.81	810.92
WBGene00000444	177.267	-0.0652373	0.233976	-0.278821	0.780382	0.972757	204	168	201	142	191.63	171.05	196.07	150.33
WBGene00000445	189.886	0.171971	0.21629	0.795092	0.42656	0.966507	198	168	201	195	185.99	171.05	196.07	206.44
WBGene00000446	69.6065	-0.537962	0.36045	-1.49247	0.135575	0.648853	94	75	45	66	88.3	76.36	43.9	69.87
WBGene00000447	187.303	0.179809	0.220727	0.814621	0.415289	0.962107	196	164	190	201	184.11	166.98	185.34	212.79
WBGene00000448	686.638	0.0107295	0.132403	0.081037	0.935413	0.99961	727	673	699	658	682.9	685.23	681.84	696.59
WBGene00000449	376.982	-0.0125874	0.168658	-0.0746324	0.940507	0.99961	374	399	397	343	351.31	406.25	387.25	363.12
WBGene00000450	3.9916	0.055351	1.35159	0.0409526	0.967334	0.99961	4	4	4	4	3.76	4.07	3.9	4.23
WBGene00000451	36.8155	0.334134	0.496644	0.672783	0.501085	0.972757	26	40	31	49	24.42	40.73	30.24	51.87
WBGene00000452	82.0133	-0.573323	0.331841	-1.7277	0.0840413	0.50606	110	91	54	75	103.33	92.65	52.67	79.4
WBGene00000453	835.215	-0.144922	0.130577	-1.10985	0.267062	0.857613	907	886	765	794	851.98	902.1	746.22	840.57
WBGene00000454	73.1991	-0.357253	0.34009	-1.05046	0.293505	0.882889	82	86	75	52	77.03	87.56	73.16	55.05
WBGene00000455	193.115	0.163809	0.21665	0.756099	0.44959	0.972757	198	175	195	206	185.99	178.18	190.21	218.08
WBGene00000457	107.591	0.792899	0.281755	2.81414	0.00489076	0.0710703	82	79	130	138	77.03	80.44	126.81	146.09
WBGene00000458	634.211	-0.0312957	0.146121	-0.214176	0.83041	0.979316	643	666	595	637	603.99	678.1	580.39	674.36
WBGene00000459	1409.77	-0.068227	0.109523	-0.622946	0.53332	0.972757	1515	1437	1395	1315	1423.1	1463.1	1360.75	1392.12
WBGene00000460	155.985	0.0531138	0.235596	0.225444	0.821634	0.978482	172	142	163	150	161.57	144.58	159	158.8
WBGene00000461	25.7355	0.239138	0.556894	0.429414	0.667622	0.972757	20	28	31	24	18.79	28.51	30.24	25.41
WBGene00000462	67.2256	-0.322491	0.346337	-0.931147	0.351778	0.935224	80	73	66	52	75.15	74.33	64.38	55.05
WBGene00000463	433.446	0.0362878	0.156129	0.232421	0.816211	0.977815	471	406	441	423	442.43	413.38	430.17	447.81
WBGene00000464	945.182	-0.130477	0.120934	-1.07891	0.280629	0.870202	1067	956	915	862	1002.27	973.37	892.53	912.55
WBGene00000465	155.627	0.52827	0.244829	2.15771	0.0309503	0.271869	152	110	199	164	142.78	112	194.11	173.62
WBGene00000466	600.331	0.192439	0.138664	1.38781	0.165196	0.715034	584	562	654	607	548.57	572.21	637.94	642.6
WBGene00000467	114.689	0.441217	0.269194	1.63903	0.101207	0.561528	102	97	133	127	95.81	98.76	129.73	134.45
WBGene00000468	7.22123	-0.029659	1.02091	-0.0290516	0.976823	0.99961	9	6	6	8	8.45	6.11	5.85	8.47
WBGene00000469	14.0401	-0.0130165	0.773898	-0.0168194	0.986581	0.99961	16	13	21	7	15.03	13.24	20.48	7.41
WBGene00000472	5040.75	0.0970217	0.111904	0.867011	0.385936	0.951647	5020	4937	4790	5430	4715.48	5026.69	4672.4	5748.45
WBGene00000473	198.649	1.2901	0.216357	5.96282	2.47923e-09	2.34268e-07	123	113	283	272	115.54	115.05	276.05	287.95
WBGene00000474	49.382	0.56832	0.406702	1.39739	0.162297	0.707766	36	45	59	57	33.82	45.82	57.55	60.34
WBGene00000475	3072.56	0.307251	0.10784	2.84914	0.00438378	0.0655114	3003	2624	3217	3457	2820.83	2671.67	3138.02	3659.74
WBGene00000476	450.769	-0.330961	0.153478	-2.1564	0.0310521	0.272201	522	505	403	383	490.33	514.17	393.11	405.46
WBGene00000477	239.299	-0.0448314	0.197594	-0.226887	0.820512	0.978202	255	242	227	236	239.53	246.4	221.43	249.84
WBGene00000478	397.09	-0.127675	0.167851	-0.760643	0.446871	0.972757	436	412	353	392	409.55	419.48	344.33	414.99
WBGene00000479	641.378	-0.0107586	0.152028	-0.0707669	0.943583	0.99961	657	659	730	534	617.15	670.97	712.08	565.32
WBGene00000480	698.007	0.100924	0.135248	0.746218	0.455536	0.972757	679	697	744	679	637.81	709.66	725.73	718.82
WBGene00000481	424.647	0.0804842	0.16503	0.487695	0.625766	0.972757	416	427	411	446	390.76	434.76	400.91	472.16
WBGene00000482	2046.33	-0.182332	0.107714	-1.69273	0.0905062	0.527743	2419	2041	1889	1882	2272.26	2078.08	1842.62	1992.37
WBGene00000483	9.81343	-0.343759	0.933944	-0.368072	0.71282	0.972757	5	17	9	8	4.7	17.31	8.78	8.47
WBGene00000484	173.569	0.391331	0.227909	1.71705	0.0859709	0.510835	168	140	215	174	157.81	142.54	209.72	184.2
WBGene00000485	797.864	-0.314298	0.131677	-2.38688	0.016992	0.17659	957	854	685	713	898.95	869.51	668.18	754.81
WBGene00000487	29.2889	-0.292201	0.513566	-0.568964	0.56938	0.972757	34	32	29	23	31.94	32.58	28.29	24.35
WBGene00000488	248.736	-0.202106	0.213221	-0.947868	0.343196	0.929082	243	299	259	198	228.26	304.43	252.64	209.61
WBGene00000490	486.979	0.131886	0.150042	0.878994	0.379404	0.948104	479	471	509	493	449.94	479.56	496.5	521.91
WBGene00000491	448.85	-0.0893788	0.155684	-0.574104	0.565898	0.972757	519	430	447	410	487.52	437.81	436.03	434.04
WBGene00000492	113.814	0.107787	0.271689	0.39673	0.691566	0.972757	112	112	128	105	105.21	114.03	124.86	111.16
WBGene00000493	31.4062	0.299115	0.510182	0.586292	0.557679	0.972757	36	22	31	37	33.82	22.4	30.24	39.17
WBGene00000496	20.6943	-0.816879	0.662456	-1.23311	0.217536	0.798022	26	28	23	7	24.42	28.51	22.44	7.41
WBGene00000497	159.33	-0.144426	0.233527	-0.618457	0.536274	0.972757	187	156	152	146	175.66	158.83	148.27	154.56
WBGene00000498	66.2308	0.488452	0.350137	1.39503	0.163007	0.709224	62	51	74	78	58.24	51.93	72.18	82.57
WBGene00000499	8.25414	0.658911	0.969097	0.679922	0.496554	0.972757	5	8	12	8	4.7	8.15	11.71	8.47
WBGene00000500	513.338	-0.266864	0.162293	-1.64434	0.100107	0.557737	661	491	447	469	620.9	499.92	436.03	496.51
WBGene00000501	480.986	-0.449491	0.15417	-2.91555	0.00355066	0.0564081	587	549	388	411	551.39	558.97	378.47	435.1
WBGene00000502	252.642	-0.308092	0.199779	-1.54217	0.123033	0.620066	322	252	248	198	302.47	256.58	241.91	209.61
WBGene00000503	1182.99	0.133338	0.124523	1.07079	0.284263	0.873262	1116	1187	1209	1224	1048.3	1208.56	1179.32	1295.78
WBGene00000506	143.303	0.15327	0.245501	0.624318	0.532418	0.972757	147	131	165	133	138.08	133.38	160.95	140.8
WBGene00000507	245.844	0.265245	0.193607	1.37002	0.17068	0.725983	238	219	266	262	223.56	222.98	259.47	277.37
WBGene00000508	1271.85	-0.0657177	0.118551	-0.554339	0.579347	0.972757	1371	1290	1191	1251	1287.83	1313.43	1161.76	1324.37
WBGene00000509	662.544	-0.0812494	0.139366	-0.582994	0.559898	0.972757	679	712	673	596	637.81	724.93	656.48	630.95
WBGene00000510	417.959	-0.0881923	0.15819	-0.557508	0.577181	0.972757	452	429	400	397	424.58	436.79	390.18	420.28
WBGene00000511	78.671	-0.0429017	0.343646	-0.124843	0.900648	0.990657	91	73	98	56	85.48	74.33	95.59	59.28
WBGene00000512	162.954	1.32167	0.259898	5.08532	3.67015e-07	2.20281e-05	103	88	284	178	96.75	89.6	277.03	188.44
WBGene00000513	14.1583	0.389596	0.757367	0.514409	0.606966	0.972757	11	14	22	10	10.33	14.25	21.46	10.59
WBGene00000514	113.199	-0.15034	0.273377	-0.549936	0.582363	0.972757	129	115	119	93	121.17	117.09	116.08	98.45
WBGene00000515	167.78	0.189649	0.238983	0.793567	0.427448	0.966526	166	155	209	145	155.93	157.82	203.87	153.5
WBGene00000516	192.8	0.0380309	0.22705	0.167501	0.866976	0.983018	185	203	177	206	173.78	206.69	172.65	218.08
WBGene00000517	168.797	0.205458	0.231205	0.888637	0.374198	0.945536	170	151	169	186	159.69	153.74	164.85	196.91
WBGene00000518	816.244	0.12792	0.130973	0.976688	0.328723	0.91729	826	770	819	856	775.89	783.99	798.89	906.2
WBGene00000519	306.584	0.238421	0.19008	1.25432	0.209725	0.785931	329	249	369	287	309.04	253.52	359.94	303.83
WBGene00000520	294.653	-0.100716	0.185919	-0.541723	0.58801	0.972757	334	291	317	245	313.74	296.29	309.22	259.37
WBGene00000521	15.7299	-0.0970761	0.706599	-0.137385	0.890726	0.987398	13	20	17	13	12.21	20.36	16.58	13.76
WBGene00000522	348.707	0.119485	0.191385	0.624318	0.532419	0.972757	407	281	405	313	382.31	286.1	395.06	331.36
WBGene00000523	51.209	-0.061806	0.411631	-0.150149	0.880647	0.983744	69	39	54	45	64.81	39.71	52.67	47.64
WBGene00000524	250.481	-0.0561806	0.208804	-0.269059	0.787885	0.973176	267	255	213	268	250.8	259.63	207.77	283.72
WBGene00000525	0	NA	NA	NA	NA	NA	0	0	0	0	0	0	0	0
WBGene00000526	188.848	0.441083	0.22305	1.97751	0.0479842	0.363851	159	168	205	222	149.35	171.05	199.97	235.02
WBGene00000527	959.233	-0.132976	0.138111	-0.962816	0.33564	0.923937	948	1097	965	839	890.49	1116.93	941.31	888.2
WBGene00000528	1298.62	-0.476433	0.121874	-3.90924	9.25861e-05	0.0028013	1493	1591	1071	1065	1402.43	1619.9	1044.7	1127.46
WBGene00000529	541.607	-0.34868	0.145484	-2.39669	0.016544	0.173697	637	604	467	470	598.36	614.97	455.53	497.56
WBGene00000530	386.877	-0.245672	0.163622	-1.50146	0.133238	0.643955	430	428	374	324	403.92	435.78	364.82	343
WBGene00000531	258.145	-0.628874	0.19137	-3.28617	0.00101561	0.0203631	336	306	217	183	315.62	311.56	211.67	193.73
WBGene00000532	720.474	0.0435491	0.130481	0.333758	0.738562	0.972757	751	701	742	698	705.44	713.73	723.78	738.94
WBGene00000533	328.911	-0.13916	0.174006	-0.799743	0.42386	0.966507	386	321	324	293	362.58	326.83	316.05	310.18
WBGene00000534	1613.44	0.227445	0.117054	1.94307	0.0520076	0.381789	1649	1398	1660	1759	1548.97	1423.4	1619.24	1862.16
WBGene00000535	546.146	0.0526787	0.176013	0.299289	0.764719	0.972757	626	475	480	609	588.03	483.63	468.22	644.72
WBGene00000536	149.837	-0.0250371	0.239904	-0.104363	0.916881	0.997724	155	154	159	134	145.6	156.8	155.1	141.86
WBGene00000537	190.955	-0.175141	0.216261	-0.809861	0.41802	0.964214	221	194	193	161	207.59	197.52	188.26	170.44
WBGene00000539	48.6087	0.786619	0.405521	1.93978	0.052407	0.383195	38	35	60	61	35.69	35.64	58.53	64.58
WBGene00000540	133.999	-0.342347	0.251317	-1.36221	0.173131	0.732467	164	143	124	109	154.05	145.6	120.96	115.39
WBGene00000541	139.451	0.183703	0.252351	0.727966	0.466635	0.972757	137	130	136	155	128.69	132.36	132.66	164.09
WBGene00000542	6201.68	-0.431164	0.0961844	-4.48269	7.37097e-06	0.000322607	7137	7405	5421	4983	6704.06	7539.52	5287.9	5275.23
WBGene00000543	472.817	0.117531	0.152396	0.771221	0.440576	0.971773	490	439	528	443	460.28	446.98	515.04	468.98
WBGene00000544	8.06917	-1.03929	2.14977	-0.483443	0.628781	0.972757	9	13	0	10	8.45	13.24	0	10.59
WBGene00000545	1932.53	-0.0894606	0.105018	-0.851856	0.394294	0.955328	2191	1892	1881	1805	2058.09	1926.37	1834.82	1910.86
WBGene00000546	8.48544	-0.264957	0.959209	-0.276225	0.782375	0.972757	11	8	5	10	10.33	8.15	4.88	10.59
WBGene00000547	862.085	-0.0251897	0.123796	-0.203476	0.838763	0.980079	914	865	873	810	858.56	880.71	851.57	857.5
WBGene00000548	1879.59	-0.117632	0.106147	-1.1082	0.267777	0.857793	2028	1972	1911	1645	1904.98	2007.82	1864.08	1741.47
WBGene00000549	945.182	-0.581454	0.127537	-4.55911	5.13701e-06	0.000233715	1262	1061	737	752	1185.45	1080.27	718.91	796.1
WBGene00000550	1900.91	0.0596726	0.106834	0.558553	0.576467	0.972757	2050	1765	1922	1895	1925.64	1797.06	1874.81	2006.13
WBGene00000551	10.3299	-0.949357	0.874792	-1.08524	0.277817	0.868196	16	12	9	5	15.03	12.22	8.78	5.29
WBGene00000552	2806.36	0.166873	0.102423	1.62925	0.10326	0.566101	2860	2555	2881	2954	2686.51	2601.41	2810.27	3127.24
WBGene00000553	682.967	0.117159	0.136468	0.858508	0.390612	0.953567	685	655	690	707	643.45	666.9	673.06	748.46
WBGene00000554	791.846	-0.229572	0.127331	-1.80295	0.0713957	0.460956	917	833	762	675	861.37	848.13	743.29	714.59
WBGene00000555	0.478697	0.0550833	4.07652	0.0135123	0.989219	0.99961	1	0	1	0	0.94	0	0.98	0
WBGene00000556	5.3532	2.15756	1.29799	1.66223	0.0964658	0.547759	2	2	6	11	1.88	2.04	5.85	11.65
WBGene00000557	41.7984	0.864112	0.495107	1.7453	0.080932	0.495104	35	26	78	30	32.88	26.47	76.08	31.76
WBGene00000558	441.901	0.700648	0.187114	3.74451	0.000180748	0.00491336	391	300	468	603	367.28	305.45	456.51	638.36
WBGene00000559	0	NA	NA	NA	NA	NA	0	0	0	0	0	0	0	0
WBGene00000560	23.8479	1.5986	0.620247	2.57736	0.00995577	0.11943	8	16	43	28	7.51	16.29	41.94	29.64
WBGene00000561	32.2673	-0.247898	0.494603	-0.501205	0.616227	0.972757	42	30	28	30	39.45	30.54	27.31	31.76
WBGene00000562	81.1758	0.219683	0.318698	0.689313	0.490626	0.972757	72	81	90	82	67.63	82.47	87.79	86.81
WBGene00000563	55.1569	-0.111466	0.388622	-0.286825	0.774247	0.972757	56	61	63	42	52.6	62.11	61.45	44.46
WBGene00000564	484.18	-0.0519068	0.149713	-0.346708	0.728811	0.972757	541	469	492	445	508.18	477.52	479.92	471.1
WBGene00000565	553.464	0.0985929	0.150684	0.654301	0.512918	0.972757	586	509	538	586	550.45	518.25	524.79	620.37
WBGene00000566	929.554	0.0531236	0.127463	0.416777	0.676842	0.972757	926	938	923	938	869.83	955.04	900.34	993.01
WBGene00000567	2889.82	-0.509594	0.108922	-4.67851	2.88963e-06	0.000141607	3428	3507	2604	2105	3220.05	3570.71	2540.07	2228.45
WBGene00000583	112.48	0.146846	0.285455	0.514428	0.606953	0.972757	104	114	139	95	97.69	116.07	135.59	100.57
WBGene00000584	133.193	-0.193984	0.251317	-0.771869	0.440192	0.971517	152	139	131	114	142.78	141.53	127.78	120.69
WBGene00000585	362.402	0.0136837	0.168566	0.0811771	0.935301	0.99961	365	372	386	332	342.86	378.76	376.52	351.47
WBGene00000591	495.95	0.241904	0.161351	1.49924	0.133812	0.645047	472	457	489	565	443.37	465.3	476.99	598.14
WBGene00000592	56.8332	0.383017	0.401123	0.95486	0.339648	0.927911	51	50	84	44	47.91	50.91	81.94	46.58
WBGene00000593	1.19388	-3.67972	2.79848	-1.3149	0.188543	0.760362	4	1	0	0	3.76	1.02	0	0
WBGene00000594	114.155	-0.480822	0.319946	-1.50282	0.132884	0.643164	148	125	130	60	139.02	127.27	126.81	63.52
WBGene00000596	0.243862	1.48086	4.9945	0.296499	0.766849	0.972757	0	0	1	0	0	0	0.98	0
WBGene00000597	23.4236	-0.640501	0.597359	-1.07222	0.283621	0.872379	39	20	17	19	36.63	20.36	16.58	20.11
WBGene00000598	0.763065	1.02936	3.16242	0.325498	0.744804	0.972757	0	1	1	1	0	1.02	0.98	1.06
WBGene00000599	687.516	-0.109325	0.13429	-0.814097	0.41559	0.962118	756	704	651	650	710.14	716.79	635.02	688.12
WBGene00000601	25.7916	0.0825447	0.552004	0.149536	0.88113	0.983744	23	28	24	28	21.6	28.51	23.41	29.64
WBGene00000602	3.44829	1.91019	1.60837	1.18765	0.23497	0.823013	2	1	9	2	1.88	1.02	8.78	2.12
WBGene00000603	783.175	0.639417	0.151332	4.22525	2.38672e-05	0.000890237	707	550	867	1004	664.11	559.99	845.71	1062.88
WBGene00000606	3.179	-0.608517	1.54699	-0.393356	0.694056	0.972757	6	2	3	2	5.64	2.04	2.93	2.12
WBGene00000608	2.48574	-1.95699	1.84826	-1.05883	0.289677	0.877928	3	5	1	1	2.82	5.09	0.98	1.06
WBGene00000609	1.26256	0.655014	2.377	0.275563	0.782884	0.972757	1	1	1	2	0.94	1.02	0.98	2.12
WBGene00000610	9.55284	0.291789	0.965808	0.302119	0.762562	0.972757	15	3	14	7	14.09	3.05	13.66	7.41
WBGene00000611	381.851	-0.0814969	0.16496	-0.494041	0.621278	0.972757	436	369	394	338	409.55	375.7	384.33	357.82
WBGene00000612	0	NA	NA	NA	NA	NA	0	0	0	0	0	0	0	0
WBGene00000613	0.724211	-2.95643	3.34696	-0.883317	0.377065	0.945536	2	1	0	0	1.88	1.02	0	0
WBGene00000614	1.20291	-1.93382	2.68102	-0.721298	0.470726	0.972757	3	1	1	0	2.82	1.02	0.98	0
WBGene00000615	6.6514	-0.25907	1.06991	-0.242142	0.80867	0.976594	10	5	7	5	9.39	5.09	6.83	5.29
WBGene00000616	3149.11	-1.12847	0.10574	-10.6721	1.37436e-26	8.16904e-24	4274	4546	2009	1883	4014.73	4628.58	1959.67	1993.43
WBGene00000617	1.26147	0.585682	2.50337	0.233958	0.815018	0.977815	0	2	2	1	0	2.04	1.95	1.06
WBGene00000618	2.78076	0.355942	1.67143	0.212956	0.831361	0.979316	3	2	1	5	2.82	2.04	0.98	5.29
WBGene00000620	5.78295	-0.0805729	1.14905	-0.0701215	0.944097	0.99961	4	8	5	6	3.76	8.15	4.88	6.35
WBGene00000621	31.1069	-0.959276	0.525072	-1.82694	0.0677087	0.445002	41	43	28	14	38.51	43.78	27.31	14.82
WBGene00000622	4.53898	1.04345	1.30784	0.797837	0.424965	0.966507	2	4	6	6	1.88	4.07	5.85	6.35
WBGene00000623	2.05545	1.6229	2.06281	0.786744	0.431432	0.967925	0	2	2	4	0	2.04	1.95	4.23
WBGene00000624	0	NA	NA	NA	NA	NA	0	0	0	0	0	0	0	0
WBGene00000625	462.657	0.588378	0.159606	3.68643	0.000227421	0.00591873	390	366	521	570	366.34	372.65	508.21	603.43
WBGene00000626	0	NA	NA	NA	NA	NA	0	0	0	0	0	0	0	0
WBGene00000627	3.98366	-0.275016	1.38825	-0.198103	0.842964	0.980585	6	3	2	5	5.64	3.05	1.95	5.29
WBGene00000628	4.99743	0.31928	1.23606	0.258304	0.796172	0.973833	3	6	7	4	2.82	6.11	6.83	4.23
WBGene00000629	0.752945	-1.00618	3.3883	-0.296956	0.7665	0.972757	0	2	1	0	0	2.04	0.98	0
WBGene00000630	144.578	-0.592177	0.245557	-2.41157	0.015884	0.169081	174	181	117	110	163.44	184.29	114.13	116.45
WBGene00000631	49.745	0.281131	0.402196	0.698989	0.484559	0.972757	48	44	63	45	45.09	44.8	61.45	47.64
WBGene00000632	0.752945	-1.00618	3.3883	-0.296956	0.7665	0.972757	0	2	1	0	0	2.04	0.98	0
WBGene00000633	3.98995	0.783574	1.36919	0.572289	0.567126	0.972757	3	3	6	4	2.82	3.05	5.85	4.23
WBGene00000634	94.9056	0.738171	0.303467	2.43246	0.0149967	0.1618	83	63	110	123	77.97	64.14	107.3	130.21
WBGene00000636	0.996248	3.47338	2.97854	1.16613	0.24356	0.833996	0	0	3	1	0	0	2.93	1.06
WBGene00000637	25.1993	0.135187	0.552928	0.244493	0.806849	0.976045	23	26	28	24	21.6	26.47	27.31	25.41
WBGene00000638	1.98403	0.752512	1.95577	0.384766	0.700411	0.972757	1	2	4	1	0.94	2.04	3.9	1.06
WBGene00000639	2.81061	-1.35807	1.85198	-0.733307	0.463371	0.972757	1	7	0	3	0.94	7.13	0	3.18
WBGene00000640	6.44751	-0.869352	1.08848	-0.798683	0.424474	0.966507	8	9	5	4	7.51	9.16	4.88	4.23
WBGene00000641	279.096	0.303966	0.189	1.60829	0.107772	0.576152	249	261	298	308	233.9	265.74	290.68	326.06
WBGene00000644	18.9598	0.898797	0.656523	1.36903	0.170991	0.726969	12	15	31	18	11.27	15.27	30.24	19.06
WBGene00000645	108.7	0.063438	0.281409	0.22543	0.821645	0.978482	106	111	103	115	99.57	113.02	100.47	121.74
WBGene00000646	0	NA	NA	NA	NA	NA	0	0	0	0	0	0	0	0
WBGene00000647	15.5006	-0.412871	0.710944	-0.580736	0.561418	0.972757	16	20	11	15	15.03	20.36	10.73	15.88
WBGene00000648	1.49465	2.33035	2.51003	0.928415	0.353193	0.935224	0	1	4	1	0	1.02	3.9	1.06
WBGene00000649	1.44786	-0.897913	2.40435	-0.373453	0.708811	0.972757	4	0	1	1	3.76	0	0.98	1.06
WBGene00000650	1361.63	0.401983	0.113511	3.54135	0.000398085	0.0094769	1304	1101	1567	1485	1224.9	1121	1528.53	1572.09
WBGene00000651	7.16841	-0.260427	1.03399	-0.251866	0.801145	0.974363	8	8	9	4	7.51	8.15	8.78	4.23
WBGene00000652	392.191	0.502287	0.163227	3.07723	0.00208936	0.0370535	342	322	449	455	321.25	327.85	437.98	481.68
WBGene00000653	580.662	0.662002	0.156081	4.24141	2.22124e-05	0.000833576	447	471	657	739	419.88	479.56	640.87	782.34
WBGene00000654	4.17634	0.252532	1.39065	0.181592	0.855903	0.98186	7	1	5	4	6.58	1.02	4.88	4.23
WBGene00000655	4.00175	-1.11066	1.41656	-0.784057	0.433007	0.969274	3	8	3	2	2.82	8.15	2.93	2.12
WBGene00000656	909.044	-2.73538	0.140019	-19.5358	5.44596e-85	2.50868e-81	1584	1644	253	215	1487.91	1673.87	246.79	227.61
WBGene00000657	1.75084	-0.394774	2.04996	-0.192577	0.847291	0.980606	1	3	2	1	0.94	3.05	1.95	1.06
WBGene00000658	4.68377	0.522996	1.28659	0.406497	0.684377	0.972757	6	2	7	4	5.64	2.04	6.83	4.23
WBGene00000659	0.724211	-2.95643	3.34696	-0.883317	0.377065	0.945536	2	1	0	0	1.88	1.02	0	0
WBGene00000660	1.27159	2.03628	2.61379	0.779052	0.435949	0.970028	0	1	2	2	0	1.02	1.95	2.12
WBGene00000661	6.59446	0.24144	1.17934	0.204725	0.837787	0.980079	1	11	7	7	0.94	11.2	6.83	7.41
WBGene00000662	16.9172	-0.15246	0.719454	-0.21191	0.832177	0.979316	26	11	22	10	24.42	11.2	21.46	10.59
WBGene00000663	1.44677	-0.960845	2.37067	-0.405305	0.685253	0.972757	3	1	2	0	2.82	1.02	1.95	0
WBGene00000664	146.593	0.0856192	0.245302	0.349036	0.727063	0.972757	163	129	163	135	153.11	131.34	159	142.92
WBGene00000665	2.77913	-0.784351	1.70013	-0.461346	0.64455	0.972757	1	6	2	2	0.94	6.11	1.95	2.12
WBGene00000666	240.128	-0.968082	0.197747	-4.89557	9.80196e-07	5.31209e-05	332	318	167	153	311.86	323.78	162.9	161.97
WBGene00000667	15.1611	-4.24283	1.08502	-3.91036	9.21592e-05	0.00279297	18	40	2	1	16.91	40.73	1.95	1.06
WBGene00000668	225.628	-4.84094	0.324124	-14.9355	1.93658e-50	4.46042e-47	483	411	17	13	453.7	418.47	16.58	13.76
WBGene00000669	1.49686	-2.30731	2.51379	-0.917861	0.358692	0.939529	1	4	1	0	0.94	4.07	0.98	0
WBGene00000670	24.0575	-0.363301	0.605527	-0.599975	0.548523	0.972757	36	20	29	13	33.82	20.36	28.29	13.76
WBGene00000671	80.2561	-0.557013	0.348261	-1.59941	0.109729	0.581183	119	78	81	48	111.78	79.42	79.01	50.82
WBGene00000672	509.893	0.544636	0.152791	3.56459	0.000364426	0.00877767	460	390	581	608	432.1	397.08	566.74	643.66
WBGene00000673	3052.77	-1.47153	0.113522	-12.9625	1.99545e-38	3.34256e-35	4551	4617	1806	1392	4274.93	4700.87	1761.66	1473.64
WBGene00000674	170.799	-0.494561	0.230804	-2.14277	0.0321312	0.278434	229	181	139	140	215.11	184.29	135.59	148.21
WBGene00000675	133.799	-2.61192	0.28539	-9.15208	5.58456e-20	2.14377e-17	250	221	36	38	234.83	225.01	35.12	40.23
WBGene00000676	0	NA	NA	NA	NA	NA	0	0	0	0	0	0	0	0
WBGene00000677	5499.86	-0.984264	0.10301	-9.55506	1.23509e-21	5.41854e-19	7272	7643	3607	3654	6830.87	7781.85	3518.44	3868.29
WBGene00000678	349.123	0.906862	0.172698	5.25114	1.51158e-07	1.01281e-05	259	238	440	455	243.29	242.32	429.2	481.68
WBGene00000679	13.1654	0.217668	0.75864	0.286918	0.774175	0.972757	14	11	16	12	13.15	11.2	15.61	12.7
WBGene00000680	3.76963	-0.0958619	1.46266	-0.0655394	0.947745	0.99961	5	3	1	6	4.7	3.05	0.98	6.35
WBGene00000681	6342.33	-0.940988	0.0959199	-9.81014	1.01823e-22	4.69049e-20	8672	8382	4215	4324	8145.95	8534.27	4111.51	4577.59
WBGene00000682	8.15289	0.290489	1.00118	0.290148	0.771703	0.972757	7	8	14	4	6.58	8.15	13.66	4.23
WBGene00000683	246.324	0.579257	0.199211	2.90775	0.00364033	0.0574288	191	212	301	280	179.41	215.85	293.61	296.42
WBGene00000684	1.95529	0.0550186	1.94482	0.0282899	0.977431	0.99961	3	1	3	1	2.82	1.02	2.93	1.06
WBGene00000685	30.4773	-0.455992	0.534923	-0.852444	0.393968	0.955165	37	35	17	33	34.76	35.64	16.58	34.94
WBGene00000687	320.565	0.470416	0.177365	2.65224	0.00799587	0.102957	298	253	401	334	279.92	257.6	391.15	353.59
WBGene00000688	0.234835	-1.3705	4.99454	-0.274399	0.783778	0.972757	1	0	0	0	0.94	0	0	0
WBGene00000689	152.848	0.905144	0.23962	3.77741	0.000158466	0.00441739	116	102	210	183	108.96	103.85	204.84	193.73
WBGene00000690	3.59114	3.75873	1.95196	1.92562	0.0541516	0.389613	0	1	5	8	0	1.02	4.88	8.47
WBGene00000691	71.2377	-0.24948	0.351113	-0.71054	0.477369	0.972757	75	83	79	50	70.45	84.51	77.06	52.93
WBGene00000692	1511.37	-0.500935	0.112842	-4.43924	9.02758e-06	0.000385945	1822	1798	1226	1235	1711.48	1830.66	1195.9	1307.43
WBGene00000693	0.9771	0.0118223	2.79309	0.00423268	0.996623	0.99961	1	1	2	0	0.94	1.02	1.95	0
WBGene00000694	9.58653	-0.455988	0.907996	-0.502192	0.615533	0.972757	16	7	9	7	15.03	7.13	8.78	7.41
WBGene00000695	53.6056	-0.455066	0.384433	-1.18373	0.236519	0.825978	68	59	45	44	63.88	60.07	43.9	46.58
WBGene00000696	1.93615	-1.5493	2.103	-0.736713	0.461297	0.972757	4	2	2	0	3.76	2.04	1.95	0
WBGene00000697	0	NA	NA	NA	NA	NA	0	0	0	0	0	0	0	0
WBGene00000698	3.4634	-2.57356	1.72649	-1.49063	0.136059	0.650164	4	8	2	0	3.76	8.15	1.95	0
WBGene00000699	651.477	0.371092	0.139509	2.65999	0.00781431	0.101495	596	566	708	736	559.85	576.28	690.62	779.16
WBGene00000700	0	NA	NA	NA	NA	NA	0	0	0	0	0	0	0	0
WBGene00000701	0	NA	NA	NA	NA	NA	0	0	0	0	0	0	0	0
WBGene00000702	2.00483	0.771075	1.91613	0.402413	0.68738	0.972757	1	2	3	2	0.94	2.04	2.93	2.12
WBGene00000703	41.5525	-0.380826	0.47161	-0.807501	0.419378	0.9646	33	62	37	34	31	63.13	36.09	35.99
WBGene00000704	195.293	0.399856	0.215072	1.85918	0.0630019	0.427106	170	174	220	217	159.69	177.16	214.6	229.73
WBGene00000705	16.0212	-0.536653	0.704256	-0.762015	0.446051	0.972757	22	17	17	9	20.67	17.31	16.58	9.53
WBGene00000706	1.77055	-0.418594	2.18257	-0.19179	0.847907	0.980606	0	4	2	1	0	4.07	1.95	1.06
WBGene00000707	1.73058	1.40407	2.19131	0.640745	0.521688	0.972757	2	0	3	2	1.88	0	2.93	2.12
WBGene00000708	0	NA	NA	NA	NA	NA	0	0	0	0	0	0	0	0
WBGene00000710	5.96772	-0.965776	1.14854	-0.840875	0.400418	0.957104	6	10	5	3	5.64	10.18	4.88	3.18
WBGene00000711	4.18923	-1.61826	1.41719	-1.14188	0.253504	0.846974	8	5	1	3	7.51	5.09	0.98	3.18
WBGene00000712	3.96068	-0.32984	1.37803	-0.239356	0.810829	0.977643	4	5	5	2	3.76	5.09	4.88	2.12
WBGene00000713	3.52193	0.457265	1.45474	0.314327	0.753273	0.972757	2	4	4	4	1.88	4.07	3.9	4.23
WBGene00000714	5.18162	1.0698	1.27399	0.839723	0.401064	0.957104	6	1	9	5	5.64	1.02	8.78	5.29
WBGene00000715	177.298	-0.141841	0.226855	-0.62525	0.531807	0.972757	190	190	158	173	178.47	193.45	154.12	183.15
WBGene00000716	4.71693	-1.86155	1.34459	-1.38448	0.166213	0.717078	6	9	2	2	5.64	9.16	1.95	2.12
WBGene00000717	304.822	0.0138959	0.179009	0.0776264	0.938125	0.99961	338	284	322	282	317.5	289.16	314.09	298.54
WBGene00000718	50.5707	0.401424	0.397464	1.00996	0.312512	0.898479	44	45	54	59	41.33	45.82	52.67	62.46
WBGene00000719	8.74682	-0.199446	0.929462	-0.214582	0.830093	0.979316	8	11	8	8	7.51	11.2	7.8	8.47
WBGene00000720	730.989	-1.66224	0.138202	-12.0276	2.54332e-33	2.92895e-30	1129	1141	371	321	1060.51	1161.73	361.89	339.83
WBGene00000721	2.51719	0.127166	1.88984	0.0672892	0.946351	0.99961	4	1	0	5	3.76	1.02	0	5.29
WBGene00000722	10.2741	-0.604887	0.887262	-0.681745	0.4954	0.972757	8	17	8	8	7.51	17.31	7.8	8.47
WBGene00000723	95.9945	-0.38586	0.294819	-1.3088	0.190601	0.763648	107	115	87	77	100.51	117.09	84.86	81.52
WBGene00000724	44.271	-1.20521	0.440794	-2.73419	0.00625346	0.0865712	59	67	32	21	55.42	68.22	31.21	22.23
WBGene00000725	8.18414	-1.55655	1.06457	-1.46214	0.143702	0.66882	14	11	1	7	13.15	11.2	0.98	7.41
WBGene00000726	195.641	-0.741191	0.216508	-3.42339	0.000618462	0.0136784	272	230	157	132	255.5	234.18	153.15	139.74
WBGene00000727	148.285	-0.2571	0.250426	-1.02665	0.304586	0.891974	182	149	121	144	170.96	151.71	118.03	152.45
WBGene00000728	171.421	-0.217394	0.248236	-0.875754	0.381164	0.948889	197	180	130	180	185.05	183.27	126.81	190.56
WBGene00000729	3.04267	1.63524	1.63343	1.00111	0.316773	0.903854	1	2	4	5	0.94	2.04	3.9	5.29
WBGene00000730	16.4249	-0.490945	0.694956	-0.706441	0.479914	0.972757	16	23	16	11	15.03	23.42	15.61	11.65
WBGene00000731	0	NA	NA	NA	NA	NA	0	0	0	0	0	0	0	0
WBGene00000732	155.593	-4.49932	0.359156	-12.5275	5.28228e-36	7.48702e-33	303	306	16	10	284.62	311.56	15.61	10.59
WBGene00000733	3384.26	-2.99208	0.130957	-22.8479	1.53444e-115	2.82735e-111	5626	6620	709	775	5284.72	6740.26	691.59	820.45
WBGene00000734	19.0991	0.357233	0.644387	0.554376	0.579322	0.972757	14	20	19	23	13.15	20.36	18.53	24.35
WBGene00000735	0.469669	-2.33623	4.33359	-0.539098	0.589819	0.972757	2	0	0	0	1.88	0	0	0
WBGene00000736	4.36111	-0.947946	1.38723	-0.683338	0.494393	0.972757	9	3	5	1	8.45	3.05	4.88	1.06
WBGene00000737	2.48683	-1.91395	1.90825	-1.00299	0.315867	0.903471	4	4	0	2	3.76	4.07	0	2.12
WBGene00000738	1477.37	0.453822	0.108285	4.19101	2.77717e-05	0.00100733	1313	1238	1738	1625	1233.35	1260.49	1695.33	1720.3
WBGene00000739	1004.53	-0.4119	0.119281	-3.4532	0.000553974	0.0124482	1240	1109	895	804	1164.78	1129.15	873.03	851.15
WBGene00000740	138.327	0.603009	0.250199	2.41012	0.0159473	0.169559	121	104	162	166	113.66	105.89	158.02	175.74
WBGene00000741	18.1806	0.0335784	0.662428	0.0506899	0.959573	0.99961	23	14	15	21	21.6	14.25	14.63	22.23
WBGene00000742	44.3189	0.244673	0.422294	0.579389	0.562327	0.972757	42	41	54	41	39.45	41.74	52.67	43.4
WBGene00000743	2.24978	1.06777	1.82592	0.584782	0.558694	0.972757	2	1	3	3	1.88	1.02	2.93	3.18
WBGene00000744	0	NA	NA	NA	NA	NA	0	0	0	0	0	0	0	0
WBGene00000745	20.4655	-0.923066	0.624653	-1.47773	0.139481	0.659163	30	25	17	11	28.18	25.45	16.58	11.65
WBGene00000746	5.76159	0.42257	1.14082	0.37041	0.711077	0.972757	4	6	7	6	3.76	6.11	6.83	6.35
WBGene00000747	12.7666	-0.249858	0.798471	-0.31292	0.754341	0.972757	9	19	13	10	8.45	19.35	12.68	10.59
WBGene00000748	1.96653	-2.76966	2.27551	-1.21716	0.223543	0.807146	3	4	1	0	2.82	4.07	0.98	0
WBGene00000749	98.9705	-1.45317	0.310265	-4.68363	2.81839e-06	0.000138484	173	125	48	56	162.51	127.27	46.82	59.28
WBGene00000750	97.2753	-0.195897	0.296922	-0.65976	0.509408	0.972757	118	95	83	95	110.84	96.73	80.96	100.57
WBGene00000751	0.254542	-1.42918	4.99047	-0.286382	0.774585	0.972757	0	1	0	0	0	1.02	0	0
WBGene00000752	0	NA	NA	NA	NA	NA	0	0	0	0	0	0	0	0
WBGene00000753	46.51	0.817526	0.414018	1.97462	0.0483115	0.365131	37	32	62	55	34.76	32.58	60.48	58.23
WBGene00000754	67.7518	0.0663224	0.378123	0.175399	0.860766	0.982229	66	69	50	85	62	70.25	48.77	89.98
WBGene00000755	67.5755	0.421939	0.350524	1.20374	0.22869	0.814511	57	61	88	65	53.54	62.11	85.84	68.81
WBGene00000756	0	NA	NA	NA	NA	NA	0	0	0	0	0	0	0	0
WBGene00000757	81.0353	0.473993	0.395923	1.19719	0.231234	0.816192	104	37	85	100	97.69	37.67	82.91	105.86
WBGene00000758	0	NA	NA	NA	NA	NA	0	0	0	0	0	0	0	0
WBGene00000759	60.7687	0.0913396	0.366827	0.249	0.803361	0.974698	57	63	58	65	53.54	64.14	56.58	68.81
WBGene00000760	12.5069	-0.0461712	0.789142	-0.0585081	0.953344	0.99961	14	12	9	15	13.15	12.22	8.78	15.88
WBGene00000761	865.534	0.944252	0.129425	7.29574	2.97021e-13	5.58461e-11	591	618	1176	1068	555.15	629.23	1147.13	1130.63
WBGene00000762	269.546	-0.152164	0.189826	-0.801598	0.422786	0.966053	318	264	275	229	298.71	268.8	268.25	242.43
WBGene00000763	368.329	-0.126168	0.179912	-0.701276	0.483131	0.972757	393	393	407	290	369.16	400.14	397.01	307.01
WBGene00000764	122.025	-0.587129	0.262654	-2.23537	0.0253929	0.235715	158	142	98	94	148.42	144.58	95.59	99.51
WBGene00000765	110.241	0.256305	0.298681	0.858124	0.390824	0.953567	95	110	147	91	89.24	112	143.39	96.34
WBGene00000766	430.543	-0.109732	0.159129	-0.68958	0.490458	0.972757	483	432	398	416	453.7	439.85	388.23	440.4
WBGene00000767	388.818	-0.333898	0.16463	-2.02816	0.0425434	0.335863	452	435	373	306	424.58	442.9	363.84	323.95
WBGene00000768	644.181	0.0920014	0.135299	0.679986	0.496514	0.972757	671	606	690	620	630.3	617.01	673.06	656.36
WBGene00000770	7.1824	-1.33963	1.05348	-1.27162	0.203507	0.783095	10	11	4	4	9.39	11.2	3.9	4.23
WBGene00000771	1.22096	0.594335	2.55693	0.232441	0.816195	0.977815	1	1	3	0	0.94	1.02	2.93	0
WBGene00000772	73.4861	0.970228	0.349875	2.77307	0.00555298	0.0787677	57	45	117	76	53.54	45.82	114.13	80.46
WBGene00000773	183.208	0.240697	0.238943	1.00734	0.313772	0.900134	210	136	215	177	197.26	138.47	209.72	187.38
WBGene00000774	333.542	0.394897	0.171089	2.30814	0.0209912	0.205826	310	280	383	363	291.19	285.09	373.6	384.29
WBGene00000775	124.461	-0.13097	0.261873	-0.500127	0.616985	0.972757	149	118	120	114	139.96	120.14	117.05	120.69
WBGene00000776	7996.66	-0.148333	0.0900654	-1.64695	0.099568	0.556765	8613	8569	7800	7144	8090.52	8724.67	7608.49	7562.97
WBGene00000777	195.181	0.400869	0.21888	1.83145	0.0670328	0.442545	187	158	247	192	175.66	160.87	240.94	203.26
WBGene00000778	27.3465	-0.587616	0.534271	-1.09985	0.271399	0.860573	32	35	22	21	30.06	35.64	21.46	22.23
WBGene00000779	2793.22	-0.0546411	0.112415	-0.486064	0.626922	0.972757	3075	2753	2548	2830	2888.47	2803.01	2485.44	2995.97
WBGene00000780	341.106	0.256344	0.176338	1.45371	0.146027	0.674878	330	306	347	382	309.98	311.56	338.48	404.4
WBGene00000781	5691.58	-0.840323	0.106221	-7.91112	2.55093e-15	6.35182e-13	7115	7783	4039	3985	6683.39	7924.39	3939.83	4218.7
WBGene00000782	2231.06	-0.397449	0.306958	-1.2948	0.19539	0.772422	2124	3023	2000	1795	1995.16	3077.92	1950.9	1900.27
WBGene00000783	443.879	-0.0426547	0.169871	-0.2511	0.801737	0.974363	518	407	495	370	486.58	414.39	482.85	391.7
WBGene00000784	1780.65	1.38837	0.116433	11.9242	8.85152e-33	9.59401e-30	1098	920	2469	2594	1031.39	936.71	2408.38	2746.13
WBGene00000785	286.739	0.426926	0.210999	2.02335	0.0430367	0.338165	208	289	332	315	195.38	294.25	323.85	333.47
WBGene00000786	6407.27	-0.604363	0.0989511	-6.10769	1.01083e-09	1.01779e-07	7933	7865	4898	5093	7451.77	8007.88	4777.74	5391.68
WBGene00000787	1633.73	-0.528036	0.10699	-4.93537	7.99995e-07	4.50786e-05	2012	1934	1392	1245	1889.95	1969.13	1357.82	1318.01
WBGene00000788	3740.25	-0.0470599	0.0929056	-0.506534	0.612482	0.972757	4060	3721	3715	3528	3813.72	3788.6	3623.79	3734.9
WBGene00000789	11407	-0.319391	0.099392	-3.21344	0.00131154	0.0253051	12981	12902	11141	8908	12193.6	13136.4	10867.5	9430.42
WBGene00000792	261.333	-0.262208	0.18897	-1.38756	0.165271	0.71519	313	271	241	227	294.01	275.92	235.08	240.31
WBGene00000793	1323.82	-0.169146	0.124159	-1.36233	0.173093	0.732467	1497	1371	1157	1289	1406.19	1395.91	1128.59	1364.59
WBGene00000794	166.308	0.140016	0.243049	0.57608	0.564561	0.972757	153	170	202	143	143.72	173.09	197.04	151.39
WBGene00000795	265.473	-0.0386603	0.202753	-0.190677	0.848779	0.980606	317	236	295	223	297.77	240.29	287.76	236.08
WBGene00000796	1044.58	-0.314998	0.121186	-2.59929	0.00934176	0.11417	1173	1193	946	887	1101.84	1214.67	922.77	939.02
WBGene00000797	34.0159	0.353443	0.478166	0.739165	0.459807	0.972757	30	31	37	38	28.18	31.56	36.09	40.23
WBGene00000798	92.3946	0.276076	0.308103	0.896052	0.370225	0.943722	102	70	111	89	95.81	71.27	108.27	94.22
WBGene00000799	126.001	0.550175	0.259216	2.12246	0.0337992	0.287949	104	105	155	140	97.69	106.91	151.19	148.21
WBGene00000800	1478.99	-0.161686	0.121878	-1.32662	0.184633	0.754837	1530	1657	1501	1254	1437.19	1687.1	1464.15	1327.54
WBGene00000802	28435.2	0.43815	0.0838837	5.22331	1.75756e-07	1.14031e-05	25680	23747	34330	30183	24122.2	24178.4	33487.1	31953.1
WBGene00000803	181.721	-0.254987	0.220898	-1.15432	0.24837	0.84106	201	203	165	161	188.81	206.69	160.95	170.44
WBGene00000804	52.4255	0.693893	0.429824	1.61436	0.106448	0.57389	58	25	69	59	54.48	25.45	67.31	62.46
WBGene00000812	705.002	-0.0434691	0.134402	-0.323425	0.746373	0.972757	725	737	704	663	681.02	750.39	686.72	701.88
WBGene00000813	340.067	0.0166875	0.170651	0.0977872	0.922101	0.99961	374	319	353	321	351.31	324.8	344.33	339.83
WBGene00000814	1006.84	-0.0888859	0.123174	-0.721631	0.470521	0.972757	1084	1039	1054	872	1018.24	1057.87	1028.12	923.14
WBGene00000815	349.695	0.205239	0.170613	1.20295	0.228996	0.814589	360	306	400	339	338.16	311.56	390.18	358.88
WBGene00000816	311.161	-0.0269941	0.177935	-0.151708	0.879417	0.983716	350	294	326	282	328.77	299.34	318	298.54
WBGene00000817	239.731	0.0480456	0.198012	0.24264	0.808284	0.97644	242	240	264	217	227.32	244.36	257.52	229.73
WBGene00000818	364.229	0.4648	0.173665	2.67642	0.00744131	0.0982888	331	296	473	362	310.92	301.38	461.39	383.23
WBGene00000819	7.69145	-0.594202	0.996465	-0.596311	0.550968	0.972757	11	8	5	7	10.33	8.15	4.88	7.41
WBGene00000820	82.5413	0.155436	0.321807	0.48301	0.629089	0.972757	71	88	86	85	66.69	89.6	83.89	89.98
WBGene00000821	0.508524	2.49882	3.86223	0.646987	0.51764	0.972757	0	0	1	1	0	0	0.98	1.06
WBGene00000822	5624.23	-0.281952	0.0979661	-2.87805	0.00400138	0.0614925	6385	6234	5502	4520	5997.68	6347.25	5366.91	4785.08
WBGene00000829	16017.9	-0.154611	0.0938324	-1.64774	0.0994064	0.556365	18485	16095	16430	13502	17363.7	16387.4	16026.6	14293.8
WBGene00000830	70.3891	-0.82424	0.352543	-2.33798	0.0193881	0.194684	80	103	52	48	75.15	104.87	50.72	50.82
WBGene00000831	7003.27	-0.14485	0.102144	-1.41809	0.156163	0.697678	8243	6842	7255	5882	7742.97	6966.29	7076.87	6226.96
WBGene00000832	2735.89	-0.169753	0.0969573	-1.75081	0.0799794	0.491213	3035	2890	2623	2448	2850.89	2942.5	2558.6	2591.57
WBGene00000833	12551.3	-0.0486943	0.091785	-0.530525	0.595748	0.972757	13612	12512	11969	12284	12786.3	12739.3	11675.1	13004.4
WBGene00000834	884.174	-0.125454	0.124296	-1.00932	0.312822	0.89895	950	936	870	796	892.37	953	848.64	842.68
WBGene00000835	184.841	0.481158	0.232763	2.06716	0.0387195	0.315404	170	146	189	233	159.69	148.65	184.36	246.66
WBGene00000836	718.23	0.0920208	0.141534	0.650169	0.515583	0.972757	784	642	704	752	736.44	653.66	686.72	796.1
WBGene00000837	1235.98	-0.0427829	0.113365	-0.37739	0.705884	0.972757	1304	1261	1257	1142	1224.9	1283.91	1226.14	1208.97
WBGene00000838	683.957	0.0319063	0.135863	0.234842	0.814332	0.977815	757	630	704	658	711.08	641.44	686.72	696.59
WBGene00000839	593.637	0.0355762	0.139383	0.25524	0.798538	0.973856	609	590	621	563	572.06	600.72	605.75	596.02
WBGene00000840	721.806	0.00951076	0.133461	0.0712626	0.943189	0.99961	756	716	778	651	710.14	729.01	758.9	689.18
WBGene00000841	212.175	0.285891	0.215199	1.32849	0.184015	0.753647	228	165	233	226	214.17	168	227.28	239.25
WBGene00000843	395.646	0.614427	0.168487	3.64673	0.000265594	0.00676878	331	309	534	412	310.92	314.61	520.89	436.16
WBGene00000845	233.987	0.0654077	0.201242	0.32502	0.745166	0.972757	245	223	226	244	230.14	227.05	220.45	258.31
WBGene00000846	357.572	-0.0107351	0.168287	-0.0637903	0.949137	0.99961	386	349	383	320	362.58	355.34	373.6	338.77
WBGene00000851	2.74709	0.824274	1.68003	0.49063	0.623688	0.972757	1	3	5	2	0.94	3.05	4.88	2.12
WBGene00000853	43.9271	-0.0666085	0.428617	-0.155403	0.876503	0.983525	47	45	51	34	44.15	45.82	49.75	35.99
WBGene00000854	366.559	-0.00826498	0.174277	-0.0474245	0.962175	0.99961	360	390	350	368	338.16	397.08	341.41	389.58
WBGene00000857	248.704	0.232031	0.193976	1.19619	0.231624	0.816888	256	213	271	258	240.47	216.87	264.35	273.13
WBGene00000858	297.995	0.125429	0.184179	0.681014	0.495862	0.972757	285	297	300	311	267.71	302.4	292.63	329.24
WBGene00000859	0	NA	NA	NA	NA	NA	0	0	0	0	0	0	0	0
WBGene00000860	2.69921	-0.765239	1.67135	-0.457857	0.647056	0.972757	4	3	3	1	3.76	3.05	2.93	1.06
WBGene00000861	0.704504	-2.92102	3.675	-0.794837	0.426709	0.966507	3	0	0	0	2.82	0	0	0
WBGene00000862	306.157	0.0135054	0.183143	0.0737427	0.941215	0.99961	332	292	288	316	311.86	297.3	280.93	334.53
WBGene00000863	163.059	0.229247	0.230562	0.994297	0.320078	0.90871	155	152	186	161	145.6	154.76	181.43	170.44
WBGene00000864	0.264662	1.54046	4.99037	0.308686	0.75756	0.972757	0	0	0	1	0	0	0	1.06
WBGene00000865	343.063	0.959869	0.178912	5.36503	8.09372e-08	5.68956e-06	233	243	499	396	218.87	247.41	486.75	419.22
WBGene00000866	30.0078	0.446753	0.537041	0.831879	0.405477	0.957104	26	26	47	22	24.42	26.47	45.85	23.29
WBGene00000867	66.2561	1.11002	0.392393	2.82884	0.00467174	0.0688101	30	55	104	75	28.18	56	101.45	79.4
WBGene00000868	582.294	1.07982	0.153213	7.04786	1.81686e-12	3.01599e-10	387	378	888	675	363.52	384.87	866.2	714.59
WBGene00000869	4929.79	-0.325369	0.0898222	-3.62236	0.000291923	0.00730839	5798	5422	4498	4123	5446.29	5520.5	4387.56	4364.8
WBGene00000870	200.648	-0.437366	0.227858	-1.91946	0.0549257	0.392729	279	196	190	147	262.08	199.56	185.34	155.62
WBGene00000871	77.0132	-1.61367e-05	0.333478	-4.83892e-05	0.999961	0.999961	89	69	68	83	83.6	70.25	66.33	87.87
WBGene00000872	1031.25	-0.251546	0.117839	-2.13466	0.0327888	0.282321	1191	1103	956	898	1118.75	1123.04	932.53	950.66
WBGene00000874	1153.78	0.00819911	0.115998	0.0706829	0.94365	0.99961	1225	1130	1225	1057	1150.69	1150.53	1194.92	1118.99
WBGene00000875	251.795	0.573701	0.198616	2.88849	0.00387093	0.0599826	196	217	321	273	184.11	220.94	313.12	289.01
WBGene00000876	1646.7	-0.0799534	0.107127	-0.746344	0.45546	0.972757	1795	1668	1591	1559	1686.11	1698.3	1551.94	1650.43
WBGene00000877	725.705	-0.251552	0.151434	-1.66113	0.096687	0.548048	907	712	605	695	851.98	724.93	590.15	735.76
WBGene00000878	20.9009	-0.3178	0.647356	-0.49092	0.623483	0.972757	17	30	25	12	15.97	30.54	24.39	12.7
WBGene00000879	1831.81	-0.0266552	0.103235	-0.258198	0.796254	0.973833	1969	1815	1875	1701	1849.56	1847.97	1828.96	1800.76
WBGene00000880	456.994	0.045724	0.15451	0.295929	0.767284	0.972757	456	463	486	429	428.34	471.41	474.07	454.16
WBGene00000881	4559.19	-0.115345	0.0914671	-1.26105	0.20729	0.783789	5054	4651	4582	4047	4747.42	4735.49	4469.5	4284.34
WBGene00000882	171.706	0.00622461	0.229265	0.0271503	0.97834	0.99961	189	162	162	176	177.54	164.94	158.02	186.32
WBGene00000883	2067.61	-0.566961	0.113352	-5.00178	5.6804e-07	3.27084e-05	2688	2370	1847	1446	2524.94	2413.05	1801.65	1530.8
WBGene00000884	346.708	0.1236	0.171342	0.721364	0.470686	0.972757	337	341	356	355	316.56	347.19	347.26	375.82
WBGene00000885	29.1561	0.576551	0.51785	1.11336	0.265556	0.855897	26	22	39	30	24.42	22.4	38.04	31.76
WBGene00000886	131.244	0.679388	0.261886	2.59421	0.00948077	0.115385	101	105	149	168	94.87	106.91	145.34	177.85
WBGene00000887	103.91	0.136665	0.284305	0.480698	0.630731	0.972757	110	93	120	95	103.33	94.69	117.05	100.57
WBGene00000888	132.766	0.157215	0.25144	0.625259	0.531801	0.972757	134	123	147	129	125.87	125.23	143.39	136.57
WBGene00000889	472.463	-0.0541915	0.150849	-0.359245	0.719412	0.972757	523	463	486	428	491.27	471.41	474.07	453.1
WBGene00000890	243.626	0.309491	0.195615	1.58215	0.113616	0.593016	240	206	287	245	225.44	209.74	279.95	259.37
WBGene00000891	235.324	0.107126	0.20806	0.514879	0.606638	0.972757	241	223	282	201	226.38	227.05	275.08	212.79
WBGene00000892	282.805	-0.0404777	0.188247	-0.215024	0.829749	0.979316	303	284	311	240	284.62	289.16	303.36	254.08
WBGene00000893	59.6019	0.0714118	0.365672	0.195289	0.845166	0.980606	63	56	58	62	59.18	57.02	56.58	65.64
WBGene00000894	2187.17	-0.129954	0.104742	-1.24071	0.214713	0.79142	2478	2203	2042	2065	2327.68	2243.02	1991.86	2186.1
WBGene00000895	189.222	0.10874	0.217454	0.500061	0.617032	0.972757	183	189	206	181	171.9	192.43	200.94	191.61
WBGene00000896	203.064	0.477428	0.221341	2.15698	0.031007	0.271934	202	147	259	208	189.75	149.67	252.64	220.2
WBGene00000897	769.707	-0.136919	0.133754	-1.02366	0.305994	0.892552	803	843	738	705	754.29	858.31	719.88	746.35
WBGene00000898	4845.91	-0.413172	0.102587	-4.02752	5.63693e-05	0.00183185	5732	5584	3953	4211	5384.29	5685.44	3855.95	4457.96
WBGene00000899	1813.92	0.0446441	0.105812	0.421919	0.673084	0.972757	1861	1791	1833	1791	1748.11	1823.54	1788	1896.04
WBGene00000900	2000.96	-0.114108	0.114281	-0.998483	0.318045	0.904786	2191	2064	1803	1970	2058.09	2101.5	1758.73	2085.53
WBGene00000901	2767.6	-0.543625	0.096778	-5.61724	1.94035e-08	1.52217e-06	3452	3264	2291	2144	3242.6	3323.29	2234.75	2269.74
WBGene00000902	50.8673	-0.423079	0.402439	-1.05129	0.293126	0.882395	57	62	51	35	53.54	63.13	49.75	37.05
WBGene00000903	904.728	-0.301594	0.124783	-2.41695	0.0156512	0.167085	1045	998	797	797	981.61	1016.13	777.43	843.74
WBGene00000904	417.765	-0.362661	0.158803	-2.28371	0.0223887	0.2161	513	450	388	333	481.88	458.17	378.47	352.53
WBGene00000905	49.8049	-1.18126	0.409556	-2.88426	0.00392338	0.0605463	67	74	31	29	62.94	75.34	30.24	30.7
WBGene00000906	302.681	0.0140483	0.180315	0.0779098	0.9379	0.99961	330	287	295	303	309.98	292.21	287.76	320.77
WBGene00000907	217.624	0.291885	0.205084	1.42324	0.154666	0.694591	202	198	234	237	189.75	201.6	228.25	250.9
WBGene00000908	984.159	-0.0735609	0.122015	-0.602883	0.546586	0.972757	1121	948	978	911	1053	965.22	953.99	964.43
WBGene00000910	685.118	-0.0186122	0.135855	-0.137001	0.89103	0.987556	704	705	675	664	661.29	717.81	658.43	702.94
WBGene00000911	3247.79	-0.105355	0.104563	-1.00757	0.313663	0.900134	3404	3472	3043	3108	3197.51	3535.07	2968.29	3290.27
WBGene00000912	3094.07	0.129064	0.0994401	1.29791	0.194319	0.771167	3034	3007	3212	3147	2849.95	3061.63	3133.14	3331.56
WBGene00000913	692.766	0.242446	0.135805	1.78526	0.0742199	0.472066	686	614	810	672	644.39	625.15	790.11	711.41
WBGene00000914	857.13	-0.0616699	0.12481	-0.494111	0.621228	0.972757	907	883	858	794	851.98	899.04	836.93	840.57
WBGene00000915	34002.3	-0.35383	0.098158	-3.6047	0.000312518	0.00773986	41065	37056	33101	25899	38573.9	37729.2	32288.3	27417.9
WBGene00000917	157.406	-0.158659	0.253119	-0.626815	0.530781	0.972757	175	165	181	114	164.38	168	176.56	120.69
WBGene00000920	55.6702	-0.74503	0.380425	-1.95842	0.0501813	0.374197	78	65	43	39	73.27	66.18	41.94	41.29
WBGene00000928	66.8851	-0.429646	0.359742	-1.19432	0.232355	0.818461	95	63	53	59	89.24	64.14	51.7	62.46
WBGene00000929	173.316	-0.209006	0.231448	-0.903037	0.366506	0.941862	204	177	183	135	191.63	180.22	178.51	142.92
WBGene00000930	0	NA	NA	NA	NA	NA	0	0	0	0	0	0	0	0
WBGene00000931	2973.83	-0.112436	0.0959611	-1.17169	0.241323	0.832528	3255	3066	2883	2743	3057.55	3121.7	2812.22	2903.87
WBGene00000932	157.176	-1.01518	0.251215	-4.04109	5.32026e-05	0.00174433	242	190	122	84	227.32	193.45	119	88.93
WBGene00000933	359.129	-0.0253176	0.170179	-0.148771	0.881734	0.983744	390	352	390	313	366.34	358.39	380.42	331.36
WBGene00000934	325.023	0.369792	0.173009	2.13741	0.0325644	0.281071	295	285	379	343	277.1	290.18	369.69	363.12
WBGene00000935	134.75	0.574969	0.254937	2.25534	0.024112	0.227623	106	115	172	146	99.57	117.09	167.78	154.56
WBGene00000936	583.411	-0.299863	0.152925	-1.96085	0.0498964	0.372978	695	623	477	549	652.84	634.32	465.29	581.2
WBGene00000937	205.691	-0.0499174	0.210592	-0.237034	0.81263	0.977815	217	211	220	179	203.84	214.83	214.6	189.5
WBGene00000938	2730.34	-0.241225	0.0977155	-2.46865	0.0135623	0.15009	3076	2973	2587	2344	2889.41	3027.01	2523.48	2481.47
WBGene00000939	862.88	-0.194057	0.131088	-1.48036	0.138778	0.657581	993	893	886	704	932.76	909.22	864.25	745.29
WBGene00000940	132.826	0.387194	0.253347	1.52831	0.126434	0.628963	128	108	160	137	120.24	109.96	156.07	145.03
WBGene00000941	130.568	0.190853	0.263899	0.723204	0.469554	0.972757	138	112	125	148	129.63	114.03	121.93	156.68
WBGene00000942	7450.65	0.0300059	0.10348	0.289967	0.771841	0.972757	7610	7462	7080	7699	7148.37	7597.56	6906.17	8150.52
WBGene00000950	152.287	-0.0195577	0.24168	-0.080924	0.935502	0.99961	168	146	141	156	157.81	148.65	137.54	165.15
WBGene00000951	299.11	0.4968	0.192061	2.58668	0.00969048	0.11701	240	266	326	361	225.44	270.83	318	382.17
WBGene00000952	67.6317	0.052095	0.344758	0.151106	0.879892	0.983744	71	65	76	60	66.69	66.18	74.13	63.52
WBGene00000953	75.6995	-0.209861	0.33575	-0.625052	0.531937	0.972757	82	84	83	56	77.03	85.53	80.96	59.28
WBGene00000955	385.562	0.288085	0.162862	1.76889	0.0769123	0.480891	362	348	421	413	340.04	354.32	410.66	437.22
WBGene00000958	1679.58	-0.0305118	0.115219	-0.264816	0.791151	0.973176	1674	1790	1664	1606	1572.45	1822.52	1623.15	1700.19
WBGene00000959	1155.81	-0.292543	0.116519	-2.51068	0.0120498	0.137735	1329	1274	1099	950	1248.38	1297.14	1072.02	1005.71
WBGene00000960	204.156	-0.067653	0.208627	-0.324277	0.745729	0.972757	227	201	208	185	213.23	204.65	202.89	195.85
WBGene00000961	642.483	0.0792128	0.136192	0.581625	0.560819	0.972757	654	624	660	639	614.33	635.34	643.8	676.47
WBGene00000962	5071.74	0.0358291	0.0919159	0.389803	0.696683	0.972757	5459	4802	5154	4952	5127.85	4889.23	5027.46	5242.42
WBGene00000963	893.425	0.259405	0.128463	2.0193	0.0434561	0.340293	910	758	1040	881	854.8	771.77	1014.47	932.67
WBGene00000964	686.089	-0.020855	0.13812	-0.150992	0.879982	0.983744	726	688	745	600	681.96	700.5	726.71	635.19
WBGene00000965	244.94	-0.179382	0.197488	-0.908319	0.36371	0.940259	257	274	230	222	241.41	278.98	224.35	235.02
WBGene00000966	217.462	-0.781982	0.210754	-3.71041	0.000206924	0.00548601	306	258	178	138	287.44	262.69	173.63	146.09
WBGene00000967	542.454	0.0514571	0.152256	0.337965	0.73539	0.972757	618	476	554	533	580.51	484.65	540.4	564.26
WBGene00000968	56.3907	-0.066525	0.391871	-0.169762	0.865197	0.98256	74	45	62	47	69.51	45.82	60.48	49.76
WBGene00000969	175.845	-0.551095	0.244299	-2.25582	0.0240819	0.227623	183	242	149	132	171.9	246.4	145.34	139.74
WBGene00000970	327.038	-0.0303544	0.187729	-0.161692	0.871548	0.983018	385	294	365	275	361.65	299.34	356.04	291.13
WBGene00000971	65.8153	-0.462023	0.348412	-1.32608	0.184813	0.755062	80	76	56	53	75.15	77.38	54.63	56.11
WBGene00000972	58.0998	-0.715906	0.376925	-1.89933	0.0575209	0.404998	78	70	51	36	73.27	71.27	49.75	38.11
WBGene00000973	1026.74	-0.125498	0.120213	-1.04396	0.296503	0.884587	1168	1027	1039	898	1097.15	1045.66	1013.49	950.66
WBGene00000974	16.1298	-0.453237	0.699705	-0.647754	0.517144	0.972757	17	21	17	10	15.97	21.38	16.58	10.59
WBGene00000975	327.779	-0.507636	0.177994	-2.85198	0.00434481	0.0651403	384	402	291	243	360.71	409.3	283.86	257.25
WBGene00000976	441.351	0.123389	0.157795	0.781958	0.434239	0.970028	427	436	453	452	401.1	443.92	441.88	478.51
WBGene00000977	262.473	-0.453627	0.190374	-2.38282	0.0171805	0.177747	336	286	235	202	315.62	291.2	229.23	213.85
WBGene00000978	227.844	-0.660468	0.200504	-3.29404	0.000987587	0.0198444	293	278	184	164	275.23	283.05	179.48	173.62
WBGene00000979	17.2442	0.781233	0.669074	1.16763	0.242955	0.833996	14	12	23	20	13.15	12.22	22.44	21.17
WBGene00000980	632.506	0.0560121	0.146184	0.383162	0.7016	0.972757	599	666	651	618	562.66	678.1	635.02	654.24
WBGene00000981	2965.91	-0.0248799	0.111625	-0.222888	0.823623	0.978758	3478	2667	3062	2734	3267.02	2715.45	2986.82	2894.34
WBGene00000982	313.605	-0.141242	0.18695	-0.755509	0.449944	0.972757	390	286	295	292	366.34	291.2	287.76	309.12
WBGene00000983	1169.72	-0.734181	0.115387	-6.36276	1.98162e-10	2.3557e-08	1590	1403	897	833	1493.55	1428.49	874.98	881.85
WBGene00000984	523.787	-0.305746	0.145105	-2.10707	0.0351114	0.296049	627	559	482	441	588.97	569.15	470.17	466.86
WBGene00000985	891.556	0.147878	0.13407	1.10299	0.270033	0.858754	961	775	1023	828	902.7	789.08	997.88	876.56
WBGene00000986	85.3687	-0.216277	0.338516	-0.638898	0.522889	0.972757	73	113	75	80	68.57	115.05	73.16	84.69
WBGene00000987	355.23	-0.171288	0.172026	-0.995709	0.319391	0.907355	370	398	342	316	347.56	405.23	333.6	334.53
WBGene00000988	381.072	-0.277309	0.165324	-1.67737	0.0934704	0.537764	422	431	345	333	396.4	438.83	336.53	352.53
WBGene00000989	46.938	-0.14111	0.424592	-0.332343	0.73963	0.972757	41	59	48	40	38.51	60.07	46.82	42.35
WBGene00000990	39.2197	0.386811	0.456714	0.846944	0.397026	0.956038	42	28	51	37	39.45	28.51	49.75	39.17
WBGene00000991	4498.1	-0.166048	0.108524	-1.53006	0.126003	0.628324	5403	4359	4641	3733	5075.25	4438.19	4527.05	3951.93
WBGene00000992	91.8499	-0.30667	0.308822	-0.993032	0.320694	0.909435	97	110	74	87	91.12	112	72.18	92.1
WBGene00000993	618.36	-0.463871	0.137326	-3.37789	0.000730439	0.0156138	772	696	534	490	725.17	708.64	520.89	518.74
WBGene00000994	221.931	0.416926	0.215354	1.936	0.0528679	0.384914	230	161	272	229	216.05	163.92	265.32	242.43
WBGene00000995	750.084	0.156272	0.133704	1.16879	0.242489	0.833547	710	739	822	736	666.93	752.42	801.82	779.16
WBGene00000996	430.434	-0.167462	0.174944	-0.957233	0.33845	0.926639	506	428	474	329	475.31	435.78	462.36	348.29
WBGene00000998	12166.2	-0.357439	0.107107	-3.3372	0.000846271	0.0176396	13948	13975	9885	11044	13101.9	14228.9	9642.3	11691.7
WBGene00001000	2995.92	0.22859	0.123415	1.8522	0.0639972	0.431156	2998	2653	2887	3448	2816.14	2701.2	2816.12	3650.21
WBGene00001001	570.23	0.179457	0.142872	1.25607	0.209091	0.785146	563	531	594	597	528.85	540.65	579.42	632.01
WBGene00001002	156.505	0.198584	0.245408	0.809202	0.418399	0.964521	148	150	194	137	139.02	152.72	189.24	145.03
WBGene00001005	1073.97	0.618352	0.349426	1.76962	0.0767901	0.480728	941	796	1013	1524	883.92	810.46	988.13	1613.38
WBGene00001006	3346.46	0.0375322	0.0972553	0.385914	0.699561	0.972757	3491	3267	3338	3329	3279.23	3326.35	3256.05	3524.23
WBGene00001007	535.961	0.192533	0.153043	1.25804	0.208378	0.784868	544	481	639	491	511	489.74	623.31	519.8
WBGene00001008	4097.46	0.0300012	0.0994022	0.301816	0.762792	0.972757	4478	3833	4045	4095	4206.36	3902.63	3945.69	4335.16
WBGene00001016	71.6456	0.3048	0.334627	0.910863	0.362368	0.939925	65	66	82	74	61.06	67.2	79.99	78.34
WBGene00001017	1559.8	-0.0343	0.11407	-0.300693	0.763649	0.972757	1582	1641	1532	1500	1486.03	1670.81	1494.39	1587.97
WBGene00001018	292.525	0.214207	0.20042	1.06879	0.285164	0.873725	265	288	367	255	248.92	293.23	357.99	269.95
WBGene00001019	596.926	0.0235953	0.145585	0.162072	0.871249	0.983018	638	574	569	613	599.3	584.43	555.03	648.95
WBGene00001020	77.3739	0.259378	0.338105	0.767154	0.44299	0.972448	86	59	98	69	80.78	60.07	95.59	73.05
WBGene00001021	32.5812	0.29684	0.48922	0.606761	0.54401	0.972757	33	27	40	31	31	27.49	39.02	32.82
WBGene00001022	66.9463	-0.789087	0.352063	-2.24133	0.0250049	0.233575	95	79	55	42	89.24	80.44	53.65	44.46
WBGene00001023	2526.28	-0.0208278	0.0981892	-0.212119	0.832014	0.979316	2725	2484	2527	2410	2559.7	2529.13	2464.96	2551.34
WBGene00001025	870.785	0.755421	0.125094	6.03883	1.55237e-09	1.50547e-07	691	635	1090	1062	649.08	646.54	1063.24	1124.28
WBGene00001026	1069.28	0.00362131	0.117277	0.0308782	0.975367	0.99961	1112	1072	1101	1008	1044.54	1091.47	1073.97	1067.12
WBGene00001027	193.718	0.134713	0.221409	0.608436	0.542898	0.972757	194	184	231	170	182.23	187.34	225.33	179.97
WBGene00001028	469.282	-0.0445197	0.152864	-0.291237	0.77087	0.972757	530	447	484	427	497.85	455.12	472.12	452.04
WBGene00001029	443.099	0.19626	0.155776	1.25988	0.207712	0.783789	422	422	472	459	396.4	429.67	460.41	485.92
WBGene00001030	3671	-0.284514	0.0926103	-3.07216	0.00212514	0.0374767	4305	3948	3389	3131	4043.85	4019.72	3305.79	3314.62
WBGene00001031	1390.74	-1.76718	0.133976	-13.1903	9.98426e-40	1.8397e-36	2559	1862	657	588	2403.77	1895.83	640.87	622.48
WBGene00001032	393.038	-0.00768216	0.170933	-0.0449424	0.964153	0.99961	407	399	443	332	382.31	406.25	432.12	351.47
WBGene00001033	148.169	-0.0128012	0.254506	-0.0502983	0.959885	0.99961	167	138	128	161	156.87	140.51	124.86	170.44
WBGene00001034	467.89	0.308906	0.158241	1.95212	0.0509234	0.37744	463	394	571	452	434.91	401.16	556.98	478.51
WBGene00001035	181.597	0.252293	0.221622	1.13839	0.254957	0.847581	174	165	190	198	163.44	168	185.34	209.61
WBGene00001036	101.396	0.316056	0.285791	1.1059	0.268771	0.858044	97	88	122	100	91.12	89.6	119	105.86
WBGene00001037	2656.49	-0.323949	0.101188	-3.20144	0.0013674	0.0261638	3009	3026	2454	2196	2826.47	3080.97	2393.75	2324.79
WBGene00001038	1497.92	0.223737	0.122902	1.82045	0.0686905	0.449624	1429	1396	1499	1668	1342.31	1421.36	1462.2	1765.82
WBGene00001039	146.382	0.161364	0.261468	0.617149	0.537137	0.972757	166	118	136	167	155.93	120.14	132.66	176.79
WBGene00001040	222.478	0.135558	0.209435	0.647254	0.517467	0.972757	229	205	213	244	215.11	208.72	207.77	258.31
WBGene00001041	199.162	0.444273	0.213554	2.08038	0.037491	0.308811	173	172	247	206	162.51	175.12	240.94	218.08
WBGene00001042	340.441	-0.363812	0.177167	-2.0535	0.0400242	0.322751	380	402	286	299	356.95	409.3	278.98	316.54
WBGene00001043	811.231	0.0796103	0.126256	0.630545	0.528338	0.972757	847	768	840	801	795.62	781.95	819.38	847.98
WBGene00001044	27.0257	0.03646	0.595385	0.0612377	0.95117	0.99961	21	33	16	37	19.73	33.6	15.61	39.17
WBGene00001045	288.443	0.788077	0.190144	4.14463	3.4037e-05	0.00120841	238	196	405	317	223.56	199.56	395.06	335.59
WBGene00001046	64.1032	1.17402	0.397091	2.95654	0.00311113	0.0512294	47	34	117	60	44.15	34.62	114.13	63.52
WBGene00001047	1379.55	0.17236	0.112351	1.53411	0.125002	0.625691	1376	1279	1559	1325	1292.53	1302.23	1520.72	1402.71
WBGene00001048	146.494	0.324161	0.259985	1.24685	0.212454	0.788455	146	121	196	127	137.14	123.2	191.19	134.45
WBGene00001049	96.1121	-0.0949177	0.301335	-0.31499	0.752769	0.972757	101	102	109	75	94.87	103.85	106.32	79.4
WBGene00001050	85.1235	0.491573	0.309123	1.59022	0.111785	0.586944	78	67	102	94	73.27	68.22	99.5	99.51
WBGene00001051	117.384	0.472625	0.276948	1.70655	0.0879064	0.518159	99	102	158	112	92.99	103.85	154.12	118.57
WBGene00001052	406.828	-0.131148	0.158464	-0.827621	0.407885	0.957632	460	411	398	367	432.1	418.47	388.23	388.52
WBGene00001053	433.984	-0.23307	0.15761	-1.47878	0.139199	0.658677	473	485	412	374	444.31	493.81	401.88	395.93
WBGene00001054	341.775	-0.293605	0.175859	-1.66955	0.0950081	0.542828	398	372	287	316	373.86	378.76	279.95	334.53
WBGene00001055	293.73	0.358036	0.18246	1.96227	0.0497315	0.372198	261	265	326	323	245.17	269.81	318	341.94
WBGene00001056	1298.75	0.133785	0.111858	1.19603	0.231687	0.816888	1290	1243	1398	1279	1211.75	1265.58	1363.68	1354.01
WBGene00001057	346.555	-0.294294	0.190848	-1.54204	0.123064	0.620066	344	433	334	280	323.13	440.87	325.8	296.42
WBGene00001058	798.401	-0.681284	0.127606	-5.33897	9.34737e-08	6.47498e-06	1046	967	642	567	982.55	984.57	626.24	600.25
WBGene00001059	476.281	-1.36078	0.177556	-7.66392	1.80345e-14	4.20639e-12	718	685	322	207	674.45	697.44	314.09	219.14
WBGene00001060	262.161	0.054199	0.192939	0.280912	0.778778	0.972757	296	232	270	256	278.04	236.21	263.37	271.01
WBGene00001061	230.544	0.0978511	0.207123	0.47243	0.63662	0.972757	222	233	267	204	208.53	237.23	260.44	215.96
WBGene00001062	0	NA	NA	NA	NA	NA	0	0	0	0	0	0	0	0
WBGene00001063	36.5337	-0.1513	0.467164	-0.323869	0.746038	0.972757	46	33	32	36	43.21	33.6	31.21	38.11
WBGene00001064	41.7257	0.0167825	0.449314	0.0373514	0.970205	0.99961	47	38	33	49	44.15	38.69	32.19	51.87
WBGene00001065	48.3563	-0.145131	0.409637	-0.354292	0.72312	0.972757	56	48	40	50	52.6	48.87	39.02	52.93
WBGene00001066	5.9012	-0.640481	1.19106	-0.537742	0.590755	0.972757	12	3	3	6	11.27	3.05	2.93	6.35
WBGene00001067	25.397	-0.351665	0.555287	-0.633303	0.526535	0.972757	26	32	24	20	24.42	32.58	23.41	21.17
WBGene00001068	157.589	0.0750236	0.233758	0.320945	0.748252	0.972757	162	152	159	159	152.17	154.76	155.1	168.32
WBGene00001069	48.1699	-0.166107	0.427382	-0.388663	0.697526	0.972757	66	39	39	50	62	39.71	38.04	52.93
WBGene00001070	10.3345	0.328992	0.889764	0.369752	0.711568	0.972757	13	6	16	7	12.21	6.11	15.61	7.41
WBGene00001071	7.86602	1.32947	1.04368	1.27383	0.202724	0.781626	2	7	10	12	1.88	7.13	9.75	12.7
WBGene00001072	74.9497	-0.488947	0.33514	-1.45894	0.144583	0.671553	105	75	65	58	98.63	76.36	63.4	61.4
WBGene00001073	495.147	-0.011659	0.153771	-0.0758208	0.939562	0.99961	518	499	543	431	486.58	508.06	529.67	456.28
WBGene00001074	9.28001	-0.993783	0.959487	-1.03574	0.300321	0.887935	10	15	3	9	9.39	15.27	2.93	9.53
WBGene00001075	829.015	-0.202592	0.125735	-1.61126	0.107122	0.574793	963	854	782	736	904.58	869.51	762.8	779.16
WBGene00001076	1122.4	-0.312402	0.132676	-2.35462	0.0185417	0.188548	1461	1094	988	982	1372.37	1113.87	963.74	1039.59
WBGene00001077	614.965	0.785805	0.167422	4.69355	2.68504e-06	0.000132996	547	382	880	660	513.82	388.94	858.39	698.71
WBGene00001078	302.455	-1.0287	0.180132	-5.71082	1.12432e-08	9.16666e-07	434	397	205	187	407.67	404.21	199.97	197.97
WBGene00001079	18.5447	-0.884608	0.687725	-1.28628	0.198345	0.775764	21	28	19	7	19.73	28.51	18.53	7.41
WBGene00001080	3204.07	-0.11468	0.112292	-1.02126	0.307129	0.893882	3364	3440	2889	3151	3159.94	3502.49	2818.07	3335.79
WBGene00001081	4812.9	-0.162987	0.118644	-1.37376	0.169518	0.724046	5298	5099	4070	4830	4976.62	5191.63	3970.07	5113.26
WBGene00001082	1019.05	0.169351	0.129079	1.312	0.189521	0.761474	993	968	1014	1104	932.76	985.58	989.1	1168.75
WBGene00001085	1071.62	-0.0095919	0.117127	-0.0818928	0.934732	0.99961	1123	1076	1085	1018	1054.88	1095.55	1058.36	1077.7
WBGene00001086	2400.18	-0.0783461	0.101421	-0.772485	0.439827	0.971384	2534	2505	2351	2245	2380.28	2550.51	2293.28	2376.66
WBGene00001087	1693.8	0.511736	0.111136	4.60459	4.13287e-06	0.000192304	1399	1453	2060	1863	1314.13	1479.4	2009.42	1972.26
WBGene00001088	640.314	0.301592	0.137498	2.19344	0.028276	0.254899	626	549	701	690	588.03	558.97	683.79	730.47
WBGene00001089	1169.9	-0.0826804	0.1147	-0.720843	0.471006	0.972757	1253	1208	1161	1077	1176.99	1229.94	1132.5	1140.16
WBGene00001090	293.139	0.0658165	0.190378	0.345714	0.729557	0.972757	297	289	342	251	278.98	294.25	333.6	265.72
WBGene00001092	80.6246	0.162978	0.316893	0.5143	0.607042	0.972757	85	71	90	78	79.84	72.29	87.79	82.57
WBGene00001093	814.284	0.0471265	0.127788	0.368787	0.712286	0.972757	819	818	849	781	769.32	832.86	828.16	826.8
WBGene00001094	1449.61	-0.0829136	0.119677	-0.692814	0.488426	0.972757	1720	1342	1446	1328	1615.66	1366.38	1410.5	1405.88
WBGene00001095	128.719	0.233998	0.254854	0.918166	0.358532	0.939529	124	118	142	132	116.48	120.14	138.51	139.74
WBGene00001096	25.1769	-0.108778	0.570879	-0.190544	0.848883	0.980606	35	19	28	20	32.88	19.35	27.31	21.17
WBGene00001099	1309.75	0.139846	0.11215	1.24695	0.212415	0.788455	1317	1233	1370	1332	1237.11	1255.4	1336.36	1410.12
WBGene00001101	2019.67	-0.312456	0.111077	-2.81296	0.00490877	0.0712758	2381	2198	1711	1828	2236.57	2237.93	1668.99	1935.21
WBGene00001102	130.959	0.324163	0.277114	1.16978	0.242089	0.833159	120	118	180	109	112.72	120.14	175.58	115.39
WBGene00001103	5.22047	1.74191	1.28661	1.35387	0.175778	0.737138	4	1	10	6	3.76	1.02	9.75	6.35
WBGene00001104	18.775	1.21882	0.661693	1.84198	0.0654787	0.436954	10	13	31	21	9.39	13.24	30.24	22.23
WBGene00001105	18.991	-0.177069	0.63863	-0.277263	0.781578	0.972757	18	23	17	18	16.91	23.42	16.58	19.06
WBGene00001106	2.72001	-0.745953	1.64612	-0.453159	0.650434	0.972757	4	3	2	2	3.76	3.05	1.95	2.12
WBGene00001107	38.5516	-0.0425477	0.479324	-0.088766	0.929268	0.99961	55	26	40	35	51.66	26.47	39.02	37.05
WBGene00001108	19.8048	-1.16745	0.635668	-1.83658	0.0662725	0.439732	28	28	12	12	26.3	28.51	11.71	12.7
WBGene00001109	39.9839	0.102175	0.44731	0.228421	0.819319	0.978202	41	38	49	33	38.51	38.69	47.8	34.94
WBGene00001110	49.2956	-0.0163846	0.408943	-0.0400657	0.968041	0.99961	47	54	43	53	44.15	54.98	41.94	56.11
WBGene00001112	288.184	-0.101232	0.181033	-0.559193	0.57603	0.972757	324	287	288	260	304.35	292.21	280.93	275.25
WBGene00001113	2554.27	-0.00215614	0.108664	-0.0198423	0.984169	0.99961	2596	2626	2455	2560	2438.52	2673.7	2394.72	2710.13
WBGene00001115	509.493	-0.0276877	0.146454	-0.189054	0.85005	0.980606	536	516	519	475	503.49	525.37	506.26	502.86
WBGene00001116	1231.6	0.00271733	0.128508	0.0211452	0.98313	0.99961	1229	1283	1157	1263	1154.45	1306.31	1128.59	1337.07
WBGene00001117	304.186	0.0736343	0.177266	0.415388	0.677858	0.972757	319	288	327	288	299.65	293.23	318.97	304.89
WBGene00001118	639.888	0.0282342	0.142906	0.197572	0.84338	0.980606	681	616	610	659	639.69	627.19	595.02	697.65
WBGene00001119	115.152	0.150235	0.271056	0.554258	0.579402	0.972757	111	112	116	122	104.27	114.03	113.15	129.15
WBGene00001121	168.836	0.123528	0.226111	0.546317	0.584848	0.972757	175	156	183	164	164.38	158.83	178.51	173.62
WBGene00001122	254.3	0.115564	0.19023	0.607496	0.543522	0.972757	265	235	271	250	248.92	239.27	264.35	264.66
WBGene00001123	24.2589	-0.118793	0.568102	-0.209104	0.834367	0.979575	31	21	26	20	29.12	21.38	25.36	21.17
WBGene00001127	135.594	-0.0145028	0.255164	-0.0568371	0.954675	0.99961	133	145	129	136	124.93	147.63	125.83	143.98
WBGene00001129	138.939	-0.220938	0.257384	-0.8584	0.390672	0.953567	155	151	150	104	145.6	153.74	146.32	110.1
WBGene00001130	2342.19	0.205381	0.107731	1.90642	0.0565951	0.400162	2252	2196	2411	2518	2115.39	2235.89	2351.81	2665.67
WBGene00001131	5928.77	-0.154348	0.107989	-1.42929	0.152921	0.691794	6408	6356	5223	5790	6019.28	6471.47	5094.76	6129.56
WBGene00001132	3242.33	-0.00792717	0.109719	-0.0722498	0.942403	0.99961	3304	3338	3056	3293	3103.58	3398.64	2980.97	3486.12
WBGene00001133	88.4417	-0.107352	0.311089	-0.345085	0.73003	0.972757	103	85	76	91	96.75	86.54	74.13	96.34
WBGene00001134	1167.43	-0.141351	0.128266	-1.10202	0.270454	0.859345	1187	1311	1184	1006	1115	1334.82	1154.93	1065
WBGene00001135	504.659	0.142526	0.146451	0.973199	0.330454	0.918255	512	470	541	502	480.94	478.54	527.72	531.44
WBGene00001136	71.0361	0.235941	0.340358	0.693215	0.488175	0.972757	62	71	75	76	58.24	72.29	73.16	80.46
WBGene00001137	29184.7	-0.0520671	0.0850966	-0.611858	0.540632	0.972757	31087	29682	28602	27787	29201.2	30221.2	27899.8	29416.6
WBGene00001145	1548.2	-0.0783507	0.118157	-0.663106	0.507262	0.972757	1743	1515	1424	1534	1637.27	1542.52	1389.04	1623.96
WBGene00001147	4.77712	-0.387765	1.27742	-0.303554	0.761468	0.972757	5	6	2	6	4.7	6.11	1.95	6.35
WBGene00001148	418.13	-0.0870929	0.167219	-0.520831	0.602484	0.972757	506	379	415	384	475.31	385.89	404.81	406.52
WBGene00001149	3528.31	-0.275505	0.116833	-2.35811	0.0183684	0.187303	3847	4041	2959	3305	3613.64	4114.41	2886.35	3498.83
WBGene00001150	50.139	0.879546	0.404178	2.17613	0.0295452	0.262995	33	39	68	60	31	39.71	66.33	63.52
WBGene00001151	116.045	-0.0836062	0.269413	-0.310328	0.756312	0.972757	136	109	115	107	127.75	110.98	112.18	113.28
WBGene00001152	555.489	-0.210879	0.153149	-1.37696	0.168525	0.721856	617	602	580	438	579.57	612.94	565.76	463.69
WBGene00001153	276.339	0.0349689	0.191988	0.182141	0.855472	0.981563	291	268	316	237	273.35	272.87	308.24	250.9
WBGene00001154	129.966	0.144146	0.258598	0.557414	0.577244	0.972757	137	116	128	140	128.69	118.11	124.86	148.21
WBGene00001155	647.449	0.12735	0.140435	0.906826	0.364499	0.940652	659	608	740	595	619.02	619.05	721.83	629.89
WBGene00001156	599.372	-1.8527	0.175615	-10.5498	5.0924e-26	2.84341e-23	854	1056	238	272	802.2	1075.18	232.16	287.95
WBGene00001157	477.059	-0.33848	0.169745	-1.99405	0.0461467	0.354625	641	455	456	376	602.12	463.27	444.8	398.05
WBGene00001158	118.58	-0.212152	0.26691	-0.794846	0.426703	0.966507	129	131	107	109	121.17	133.38	104.37	115.39
WBGene00001159	219.103	0.190131	0.207041	0.918325	0.358449	0.939522	232	188	252	209	217.93	191.42	245.81	221.26
WBGene00001160	3154.24	-0.813762	0.098149	-8.29109	1.12218e-16	2.9967e-14	4135	4084	2390	2119	3884.17	4158.19	2331.32	2243.27
WBGene00001161	152.874	0.706972	0.24505	2.88501	0.00391399	0.060452	126	112	215	160	118.36	114.03	209.72	169.38
WBGene00001162	247.892	0.0344968	0.199077	0.173284	0.862428	0.982229	284	219	267	228	266.77	222.98	260.44	241.37
WBGene00001163	268.449	0.099997	0.186158	0.537161	0.591156	0.972757	270	260	284	263	253.62	264.72	277.03	278.42
WBGene00001164	0.519203	0.0558619	3.96103	0.0141029	0.988748	0.99961	0	1	0	1	0	1.02	0	1.06
WBGene00001165	111.395	0.0934208	0.292553	0.319329	0.749477	0.972757	136	86	108	118	127.75	87.56	105.35	124.92
WBGene00001166	882.704	-0.00504126	0.12523	-0.0402561	0.967889	0.99961	947	863	866	867	889.55	878.68	844.74	917.85
WBGene00001167	125152	-0.198106	0.081099	-2.44276	0.0145753	0.158498	143340	130448	119315	110292	134645	132818	116386	116760
WBGene00001168	207332	-0.236678	0.0808601	-2.92701	0.00342237	0.054883	238748	220334	194277	180627	224265	224337	189507	191220
WBGene00001169	11907	-0.0206668	0.0882675	-0.234138	0.814877	0.977815	13142	11432	12398	10910	12344.8	11639.7	12093.6	11549.8
WBGene00001170	5.66418	-0.574017	1.15638	-0.496393	0.619617	0.972757	9	5	5	4	8.45	5.09	4.88	4.23
WBGene00001171	701.773	-0.0290993	0.139938	-0.207944	0.835273	0.979679	789	664	663	702	741.14	676.06	646.72	743.17
WBGene00001172	23798.6	-0.505387	0.0866352	-5.8335	5.42753e-09	4.7397e-07	28669	28404	19916	18814	26929.9	28920	19427	19917.4
WBGene00001173	4581.85	-0.193389	0.0905417	-2.13591	0.0326871	0.281708	5239	4769	4353	4066	4921.2	4855.64	4246.12	4304.46
WBGene00001174	118.625	-0.192286	0.274636	-0.700148	0.483835	0.972757	148	112	125	94	139.02	114.03	121.93	99.51
WBGene00001175	71.8459	-0.289158	0.338388	-0.854516	0.392819	0.954215	89	73	60	67	83.6	74.33	58.53	70.93
WBGene00001177	4769.05	-0.175274	0.0980848	-1.78697	0.0739429	0.470792	5403	4951	4318	4485	5075.25	5040.94	4211.98	4748.03
WBGene00001178	1729.93	-0.152422	0.11522	-1.32288	0.185874	0.756889	2031	1703	1573	1647	1907.8	1733.94	1534.38	1743.59
WBGene00001179	1291.03	-0.0763998	0.115686	-0.660407	0.508993	0.972757	1383	1327	1226	1245	1299.11	1351.11	1195.9	1318.01
WBGene00001182	579.67	-0.0668583	0.144824	-0.461652	0.644331	0.972757	650	565	546	567	610.57	575.26	532.59	600.25
WBGene00001184	1022.95	0.0821851	0.12205	0.673374	0.50071	0.972757	1088	948	1031	1038	1022	965.22	1005.69	1098.87
WBGene00001185	13.3958	0.13648	0.784462	0.173979	0.861882	0.982229	11	15	20	8	10.33	15.27	19.51	8.47
WBGene00001186	448.336	0.124913	0.162441	0.768976	0.441907	0.972441	462	416	433	485	433.97	423.56	422.37	513.44
WBGene00001187	2489.61	-0.169521	0.0988133	-1.71557	0.0862404	0.511777	2745	2645	2389	2226	2578.48	2693.05	2330.35	2356.55
WBGene00001188	532.628	-0.0563726	0.14546	-0.387547	0.698351	0.972757	557	553	542	487	523.21	563.05	528.69	515.56
WBGene00001189	12140.2	-0.62879	0.0872679	-7.20528	5.79244e-13	1.04639e-10	15342	14809	9556	9210	14411.3	15078	9321.38	9750.13
WBGene00001190	354.241	-0.0976751	0.17478	-0.558845	0.576268	0.972757	371	377	322	350	348.49	383.85	314.09	370.53
WBGene00001193	271.369	0.143963	0.193811	0.742797	0.457605	0.972757	261	266	319	244	245.17	270.83	311.17	258.31
WBGene00001194	4572.07	-0.000124766	0.111189	-0.00112211	0.999105	0.99961	4887	4472	4200	4768	4590.55	4553.24	4096.88	5047.62
WBGene00001196	2619.32	-0.0721177	0.110925	-0.650148	0.515597	0.972757	2731	2755	2812	2233	2565.33	2805.05	2742.96	2363.96
WBGene00001202	195.293	-0.0777894	0.212994	-0.365219	0.714948	0.972757	207	203	191	183	194.44	206.69	186.31	193.73
WBGene00001204	164.081	-0.0275484	0.245781	-0.112085	0.910756	0.994818	147	190	168	152	138.08	193.45	163.88	160.91
WBGene00001207	587.392	-0.0711643	0.144619	-0.492082	0.622661	0.972757	660	573	551	575	619.96	583.41	537.47	608.72
WBGene00001208	944.228	0.0392154	0.131619	0.297946	0.765744	0.972757	1037	873	1057	834	974.09	888.86	1031.05	882.91
WBGene00001209	2296.33	0.0158669	0.0990391	0.160208	0.872717	0.983018	2443	2232	2365	2183	2294.8	2272.55	2306.93	2311.02
WBGene00001210	83.9717	-0.846813	0.314897	-2.68917	0.00716295	0.0959121	117	104	58	60	109.9	105.89	56.58	63.52
WBGene00001211	134.628	-0.375512	0.253013	-1.48416	0.137766	0.655429	173	139	121	110	162.51	141.53	118.03	116.45
WBGene00001214	142.726	0.0053931	0.25864	0.0208518	0.983364	0.99961	128	162	154	128	120.24	164.94	150.22	135.51
WBGene00001215	895.839	-0.124541	0.131008	-0.950637	0.341789	0.929082	1066	852	909	782	1001.34	867.48	886.68	827.86
WBGene00001223	2.04589	-0.713856	2.07593	-0.343873	0.730942	0.972757	0	5	1	2	0	5.09	0.98	2.12
WBGene00001224	1154.23	0.106359	0.120038	0.886038	0.375597	0.945536	1197	1079	1154	1198	1124.39	1098.6	1125.67	1268.26
WBGene00001225	4877.54	-0.396207	0.0915068	-4.32982	1.49234e-05	0.00059694	5802	5536	4404	3899	5450.04	5636.57	4295.87	4127.66
WBGene00001226	866.65	0.198002	0.129596	1.52784	0.126552	0.629148	894	761	1000	828	839.77	774.82	975.45	876.56
WBGene00001227	1062.03	-0.247286	0.1181	-2.09388	0.036271	0.302411	1260	1102	1006	908	1183.57	1122.02	981.3	961.25
WBGene00001228	1326.43	-0.357182	0.113022	-3.16028	0.00157615	0.0295444	1566	1482	1235	1059	1471	1508.92	1204.68	1121.11
WBGene00001229	995.72	-0.127884	0.145909	-0.876468	0.380776	0.948889	1082	1045	1118	767	1016.36	1063.98	1090.55	811.98
WBGene00001230	1541.69	-0.135046	0.109128	-1.2375	0.215903	0.794056	1735	1569	1455	1436	1629.75	1597.5	1419.28	1520.22
WBGene00001231	350.936	0.0230465	0.167489	0.137601	0.890556	0.987268	377	336	365	332	354.13	342.1	356.04	351.47
WBGene00001232	1143.23	-0.237372	0.124045	-1.91359	0.0556721	0.395914	1258	1270	1146	926	1181.69	1293.07	1117.86	980.31
WBGene00001233	477.304	0.221156	0.157177	1.40706	0.159411	0.702704	498	406	495	515	467.79	413.38	482.85	545.2
WBGene00001234	285.541	0.145229	0.189043	0.768231	0.44235	0.972448	317	240	308	283	297.77	244.36	300.44	299.6
WBGene00001235	178.642	0.341979	0.222943	1.53393	0.125047	0.625691	176	147	198	195	165.32	149.67	193.14	206.44
WBGene00001236	406.848	0.010357	0.164384	0.0630051	0.949762	0.99961	439	391	386	416	412.37	398.1	376.52	440.4
WBGene00001237	13.6698	-0.4104	0.750261	-0.547009	0.584372	0.972757	18	14	10	13	16.91	14.25	9.75	13.76
WBGene00001239	3488.47	-0.682731	0.0983041	-6.94509	3.78223e-12	5.95653e-10	4615	4187	2875	2410	4335.05	4263.06	2804.41	2551.34
WBGene00001240	1461.17	-0.46851	0.12838	-3.64939	0.000262864	0.00672712	1628	1831	1331	1089	1529.24	1864.26	1298.32	1152.87
WBGene00001241	1047.98	0.0835955	0.117608	0.710797	0.47721	0.972757	1099	985	1117	1008	1032.33	1002.89	1089.58	1067.12
WBGene00001242	18.6954	0.0157096	0.63657	0.0246785	0.980311	0.99961	19	19	19	18	17.85	19.35	18.53	19.06
WBGene00001243	1428.67	-1.28647	0.134761	-9.54631	1.34394e-21	5.75893e-19	1930	2201	919	722	1812.92	2240.98	896.44	764.34
WBGene00001244	2242.88	-1.34576	0.324826	-4.14302	3.42755e-05	0.00121221	3064	3497	1558	957	2878.13	3560.53	1519.75	1013.12
WBGene00001245	0.731586	3.0311	3.62236	0.836773	0.40272	0.957104	0	0	3	0	0	0	2.93	0
WBGene00001246	4.01187	-0.699624	1.38544	-0.504983	0.613571	0.972757	3	7	3	3	2.82	7.13	2.93	3.18
WBGene00001247	148.016	-0.0995116	0.243543	-0.4086	0.682834	0.972757	173	141	138	143	162.51	143.56	134.61	151.39
WBGene00001248	367.583	-0.0564185	0.164289	-0.343409	0.731291	0.972757	398	369	371	339	373.86	375.7	361.89	358.88
WBGene00001249	272.656	-0.265621	0.188211	-1.4113	0.158157	0.699746	298	310	259	229	279.92	315.63	252.64	242.43
WBGene00001250	689.468	0.00801127	0.133796	0.0598769	0.952254	0.99961	731	676	683	677	686.66	688.28	666.23	716.7
WBGene00001251	705.693	0.128392	0.140924	0.911072	0.362258	0.939925	721	659	689	758	677.26	670.97	672.08	802.45
WBGene00001252	27.1311	-0.542301	0.557803	-0.972208	0.330947	0.919347	35	31	30	14	32.88	31.56	29.26	14.82
WBGene00001253	238.217	-0.429028	0.2002	-2.143	0.0321132	0.278434	300	260	193	206	281.8	264.72	188.26	218.08
WBGene00001258	853.813	0.0227912	0.129246	0.17634	0.860027	0.982229	852	878	857	836	800.32	893.95	835.96	885.03
WBGene00001259	1690.3	0.141802	0.106302	1.33395	0.182219	0.749961	1757	1536	1802	1690	1650.42	1563.9	1757.76	1789.11
WBGene00001262	2360.12	-0.524546	0.12043	-4.3556	1.32703e-05	0.000542171	3018	2686	2210	1620	2834.92	2734.79	2155.74	1715.01
WBGene00001263	13855.6	-0.0661926	0.0880802	-0.751503	0.45235	0.972757	14608	14364	13570	13072	13721.9	14624.9	13236.8	13838.6
WBGene00001281	268.422	0.157385	0.197949	0.79508	0.426567	0.966507	295	226	266	290	277.1	230.11	259.47	307.01
WBGene00001284	580.604	0.0966649	0.14401	0.671238	0.502069	0.972757	561	585	619	563	526.97	595.63	603.8	596.02
WBGene00001303	295.35	0.60766	0.191721	3.16951	0.00152698	0.0287398	220	257	349	352	206.65	261.67	340.43	372.64
WBGene00001309	124.028	0.140899	0.260528	0.54082	0.588632	0.972757	119	122	131	125	111.78	124.22	127.78	132.33
WBGene00001310	3.96286	-0.287011	1.37176	-0.209228	0.83427	0.979575	6	3	3	4	5.64	3.05	2.93	4.23
WBGene00001311	3.05335	1.04873	1.6033	0.654103	0.513046	0.972757	1	3	3	5	0.94	3.05	2.93	5.29
WBGene00001320	495.74	0.243196	0.155173	1.56726	0.117054	0.60213	489	441	597	465	459.34	449.01	582.34	492.27
WBGene00001324	723.54	-0.0569109	0.134675	-0.422578	0.672603	0.972757	788	722	684	710	740.2	735.12	667.21	751.64
WBGene00001325	1209.32	0.0433244	0.118358	0.366047	0.71433	0.972757	1231	1204	1195	1218	1156.33	1225.87	1165.66	1289.43
WBGene00001328	4642.93	-0.0703907	0.0925465	-0.760598	0.446897	0.972757	4979	4749	4522	4391	4676.97	4835.27	4410.98	4648.52
WBGene00001329	1950.59	-0.0179045	0.103829	-0.172442	0.86309	0.982229	2064	1951	1930	1884	1938.8	1986.44	1882.61	1994.49
WBGene00001330	3697.13	0.164801	0.100742	1.63586	0.101868	0.563503	3806	3336	3782	3899	3575.12	3396.6	3689.14	4127.66
WBGene00001331	605.392	0.235382	0.144083	1.63366	0.10233	0.563997	585	553	719	574	549.51	563.05	701.35	607.66
WBGene00001332	159.202	-0.07327	0.235143	-0.311597	0.755347	0.972757	186	149	163	143	174.72	151.71	159	151.39
WBGene00001333	2802.07	0.0110296	0.0959855	0.114909	0.908517	0.994022	2983	2731	2876	2664	2802.05	2780.61	2805.39	2820.23
WBGene00001334	726.407	0.378938	0.130452	2.9048	0.00367493	0.0577341	663	629	847	771	622.78	640.43	826.2	816.22
WBGene00001335	243	0.00833368	0.197543	0.0421868	0.96635	0.99961	272	225	262	219	255.5	229.09	255.57	231.84
WBGene00001336	1269.68	-0.296616	0.11592	-2.55881	0.0105032	0.124378	1514	1353	1225	1024	1422.16	1377.58	1194.92	1084.05
WBGene00001337	2582.84	-0.248794	0.100017	-2.48752	0.0128637	0.144529	2902	2833	2476	2178	2725.96	2884.47	2415.21	2305.73
WBGene00001338	294.141	-0.0604523	0.181424	-0.333209	0.738976	0.972757	309	305	307	261	290.26	310.54	299.46	276.31
WBGene00001340	1624.56	0.0870982	0.109215	0.79749	0.425166	0.966507	1630	1591	1657	1635	1531.12	1619.9	1616.32	1730.89
WBGene00001345	1581.13	0.0802828	0.108713	0.738487	0.460219	0.972757	1678	1471	1622	1576	1576.21	1497.72	1582.18	1668.43
WBGene00001352	1043.3	0.0177881	0.118521	0.150084	0.880698	0.983744	1073	1047	1082	986	1007.91	1066.02	1055.43	1043.83
WBGene00001358	79.5993	0.119263	0.329479	0.361975	0.71737	0.972757	92	65	94	70	86.42	66.18	91.69	74.11
WBGene00001365	245.396	0.198564	0.193941	1.02384	0.305911	0.892552	248	220	260	256	232.96	224	253.62	271.01
WBGene00001366	1085.07	-0.0597053	0.117102	-0.509859	0.610151	0.972757	1153	1112	1103	991	1083.06	1132.2	1075.92	1049.12
WBGene00001368	955.136	-0.0811658	0.122036	-0.665098	0.505988	0.972757	1036	973	918	908	973.15	990.68	895.46	961.25
WBGene00001371	95.2833	0.00316633	0.292254	0.0108342	0.991356	0.99961	104	91	99	89	97.69	92.65	96.57	94.22
WBGene00001372	24.5902	1.12176	0.594977	1.88538	0.0593779	0.412867	21	11	42	25	19.73	11.2	40.97	26.47
WBGene00001373	85.9793	-0.189022	0.309114	-0.611496	0.540871	0.972757	91	96	79	79	85.48	97.74	77.06	83.63
WBGene00001374	956.762	0.0208212	0.130406	0.159664	0.873146	0.983051	926	1012	1004	895	869.83	1030.38	979.35	947.49
WBGene00001377	147.719	0.300449	0.251126	1.19641	0.231538	0.816833	125	145	181	141	117.42	147.63	176.56	149.27
WBGene00001385	12696.9	0.0587131	0.0935014	0.627938	0.530044	0.972757	13515	11965	14038	11540	12695.2	12182.4	13693.3	12216.8
WBGene00001386	524.437	-0.230406	0.148118	-1.55556	0.119813	0.611387	630	531	511	441	591.78	540.65	498.45	466.86
WBGene00001387	48.6826	-0.392943	0.487565	-0.80593	0.420283	0.964893	83	32	57	27	77.97	32.58	55.6	28.58
WBGene00001388	25.623	-0.0549445	0.576168	-0.0953619	0.924027	0.99961	35	19	32	18	32.88	19.35	31.21	19.06
WBGene00001389	101.688	-0.488271	0.30637	-1.59373	0.110996	0.585182	123	120	106	62	115.54	122.18	103.4	65.64
WBGene00001390	437.82	-0.262949	0.164286	-1.60055	0.109476	0.580823	510	468	450	337	479.06	476.5	438.95	356.76
WBGene00001391	1174.09	-0.730473	0.117179	-6.23381	4.55235e-10	4.87684e-08	1586	1415	941	801	1489.79	1440.71	917.9	847.98
WBGene00001392	457.161	-0.963752	0.155766	-6.18719	6.12459e-10	6.3758e-08	668	571	325	286	627.48	581.37	317.02	302.77
WBGene00001393	2520.97	-0.535193	0.108984	-4.91077	9.07195e-07	4.98985e-05	3247	2865	2268	1799	3050.03	2917.05	2212.32	1904.5
WBGene00001394	19276.6	-0.543543	0.0899404	-6.04337	1.50927e-09	1.47142e-07	23312	23408	15635	15231	21897.9	23833.2	15251.1	16124.2
WBGene00001395	2810.65	-0.624016	0.0996923	-6.25942	3.86416e-10	4.23816e-08	3549	3423	2346	2017	3333.71	3485.18	2288.4	2135.29
WBGene00001396	3382.58	-0.486639	0.105333	-4.62	3.83743e-06	0.00018177	4340	3751	3088	2477	4076.73	3819.14	3012.18	2622.27
WBGene00001397	184.768	-1.26558	0.585139	-2.16286	0.0305517	0.269095	326	212	153	64	306.22	215.85	149.24	67.75
WBGene00001398	11180.2	-0.954768	0.100238	-9.52506	1.64954e-21	6.90784e-19	15108	15037	8373	6661	14191.5	15310.2	8167.43	7051.64
WBGene00001399	8.39489	-1.65751	0.99965	-1.6581	0.0972982	0.549944	12	14	5	3	11.27	14.25	4.88	3.18
WBGene00001400	88.3046	-0.129405	0.303161	-0.426853	0.669487	0.972757	101	88	84	82	94.87	89.6	81.94	86.81
WBGene00001401	21.0256	1.01393	0.668755	1.51614	0.129484	0.636383	7	21	25	30	6.58	21.38	24.39	31.76
WBGene00001402	70.0573	0.53899	0.341836	1.57675	0.114853	0.596474	63	54	78	85	59.18	54.98	76.08	89.98
WBGene00001403	1016.12	-0.0908942	0.118174	-0.769155	0.441801	0.972441	1112	1033	1016	923	1044.54	1051.77	991.06	977.13
WBGene00001404	1081.13	-0.699788	0.129007	-5.4244	5.81492e-08	4.18538e-06	1496	1249	912	716	1405.25	1271.69	889.61	757.99
WBGene00001405	844.727	0.0867223	0.136587	0.634923	0.525478	0.972757	826	848	964	755	775.89	863.41	940.33	799.28
WBGene00001406	146.398	0.265686	0.249521	1.06478	0.286975	0.875899	126	145	154	160	118.36	147.63	150.22	169.38
WBGene00001410	1327.49	0.0716241	0.125737	0.569633	0.568927	0.972757	1280	1362	1296	1376	1202.35	1386.74	1264.18	1456.7
WBGene00001411	606.133	-0.169797	0.139083	-1.22084	0.222148	0.805005	674	639	603	522	633.11	650.61	588.2	552.61
WBGene00001412	349.196	-0.31578	0.175731	-1.79695	0.0723432	0.464945	375	415	324	289	352.25	422.54	316.05	305.95
WBGene00001413	66.6394	0.565912	0.347803	1.6271	0.103715	0.567753	57	53	86	71	53.54	53.96	83.89	75.16
WBGene00001414	23.2596	-0.287603	0.584694	-0.491886	0.6228	0.972757	23	29	18	23	21.6	29.53	17.56	24.35
WBGene00001423	892.943	0.0904029	0.131748	0.686181	0.492599	0.972757	870	897	1002	816	817.22	913.3	977.4	863.86
WBGene00001424	0	NA	NA	NA	NA	NA	0	0	0	0	0	0	0	0
WBGene00001425	212.291	0.233211	0.208329	1.11943	0.262956	0.854662	214	186	250	203	201.02	189.38	243.86	214.91
WBGene00001426	615.867	0.358614	0.141521	2.53401	0.0112767	0.131592	591	515	747	619	555.15	524.36	728.66	655.3
WBGene00001427	926.113	-0.112177	0.123767	-0.906352	0.364749	0.940899	997	970	882	869	936.52	987.62	860.35	919.96
WBGene00001428	126.355	-0.123023	0.260594	-0.472087	0.636865	0.972757	144	126	134	105	135.26	128.29	130.71	111.16
WBGene00001429	49.1796	-0.101553	0.410367	-0.247469	0.804545	0.975071	50	54	57	37	46.97	54.98	55.6	39.17
WBGene00001430	52.2264	-0.130117	0.392034	-0.331901	0.739964	0.972757	63	49	47	51	59.18	49.89	45.85	53.99
WBGene00001431	1150.13	-0.65717	0.129136	-5.08896	3.60034e-07	2.17508e-05	1516	1367	1008	757	1424.04	1391.83	983.25	801.4
WBGene00001432	37.2363	-0.387126	0.475278	-0.814525	0.415344	0.962107	41	45	25	38	38.51	45.82	24.39	40.23
WBGene00001433	105.961	-0.0157508	0.291253	-0.0540794	0.956872	0.99961	97	120	116	92	91.12	122.18	113.15	97.4
WBGene00001434	55.7571	-0.294518	0.392515	-0.750335	0.453053	0.972757	71	55	41	57	66.69	56	39.99	60.34
WBGene00001435	7.36272	0.458524	1.08052	0.424353	0.671308	0.972757	11	2	11	6	10.33	2.04	10.73	6.35
WBGene00001436	2.82808	4.97198	2.1143	2.3516	0.018693	0.189773	0	0	4	7	0	0	3.9	7.41
WBGene00001437	2.57575	1.29932	1.8029	0.720684	0.471104	0.972757	1	2	1	6	0.94	2.04	0.98	6.35
WBGene00001438	55.2314	-2.15011	0.414119	-5.19201	2.08032e-07	1.32637e-05	89	95	21	19	83.6	96.73	20.48	20.11
WBGene00001439	3430.27	-0.297804	0.116946	-2.54651	0.0108806	0.128024	3734	3986	2873	3167	3507.49	4058.41	2802.46	3352.73
WBGene00001440	271.287	-0.00184216	0.187488	-0.00982551	0.992161	0.99961	282	273	264	269	264.89	277.96	257.52	284.78
WBGene00001441	2784.1	-0.115246	0.113279	-1.01736	0.308981	0.895029	2974	2943	2492	2754	2793.59	2996.46	2430.82	2915.51
WBGene00001442	18.46	0.211594	0.640597	0.330307	0.741168	0.972757	18	17	20	19	16.91	17.31	19.51	20.11
WBGene00001443	921.994	0.195173	0.122245	1.59657	0.110363	0.583178	892	866	1014	925	837.89	881.73	989.1	979.25
WBGene00001444	4493.33	-0.0688084	0.109524	-0.62825	0.52984	0.972757	5169	4267	4131	4481	4855.44	4344.52	4029.58	4743.79
WBGene00001445	434.984	0.10782	0.183862	0.586417	0.557595	0.972757	465	393	382	501	436.79	400.14	372.62	530.38
WBGene00001446	1129.03	0.375525	0.116414	3.22578	0.00125628	0.024418	1052	960	1270	1239	988.18	977.44	1238.82	1311.66
WBGene00001447	555.965	0.150883	0.157733	0.956574	0.338782	0.926952	560	518	527	620	526.03	527.41	514.06	656.36
WBGene00001448	590.559	0.0833382	0.139552	0.597183	0.550385	0.972757	600	573	612	584	563.6	583.41	596.97	618.25
WBGene00001449	903.34	-0.580916	0.125197	-4.64002	3.48367e-06	0.000166728	1133	1082	773	655	1064.27	1101.66	754.02	693.41
WBGene00001450	657.628	0.147492	0.157053	0.939124	0.347667	0.933068	611	662	624	731	573.94	674.03	608.68	773.87
WBGene00001451	442.282	0.0723158	0.174388	0.414683	0.678374	0.972757	457	425	396	492	429.28	432.72	386.28	520.85
WBGene00001452	1248.31	0.031102	0.115594	0.269063	0.787881	0.973176	1254	1269	1292	1193	1177.93	1292.05	1260.28	1262.96
WBGene00001453	124.666	-0.123807	0.258378	-0.47917	0.631818	0.972757	137	129	122	113	128.69	131.34	119	119.63
WBGene00001454	1117.17	-0.0882458	0.116616	-0.756718	0.449219	0.972757	1261	1098	1104	1029	1184.51	1117.95	1076.89	1089.35
WBGene00001455	1129.94	0.18272	0.276983	0.659678	0.509461	0.972757	1189	982	1006	1343	1116.87	999.84	981.3	1421.76
WBGene00001456	561.759	-0.124082	0.158441	-0.783148	0.43354	0.969624	615	584	621	443	577.69	594.61	605.75	468.98
WBGene00001457	1019.95	-0.35053	0.119826	-2.92531	0.00344109	0.0551352	1243	1099	943	825	1167.6	1118.96	919.85	873.38
WBGene00001458	767.096	-0.0197645	0.131473	-0.150332	0.880503	0.983744	785	793	761	738	737.38	807.41	742.32	781.28
WBGene00001459	724.059	0.362186	0.138587	2.61341	0.00896438	0.111081	620	673	822	781	582.39	685.23	801.82	826.8
WBGene00001460	646.459	0.0759304	0.142467	0.532967	0.594056	0.972757	656	631	628	675	616.21	642.46	612.58	714.59
WBGene00001461	2132.39	-0.23653	0.100696	-2.34896	0.0188258	0.190547	2438	2282	1984	1871	2290.11	2323.46	1935.29	1980.73
WBGene00001462	233.516	0.213814	0.199502	1.07174	0.283838	0.87254	223	219	244	249	209.47	222.98	238.01	263.6
WBGene00001463	212.853	-0.0101421	0.206384	-0.0491417	0.960806	0.99961	239	199	219	199	224.5	202.62	213.62	210.67
WBGene00001464	881.268	0.363671	0.333951	1.089	0.276156	0.866039	815	762	779	1156	765.56	775.84	759.87	1223.79
WBGene00001465	251.889	-0.199082	0.194426	-1.02395	0.30586	0.892552	298	254	254	209	279.92	258.61	247.76	221.26
WBGene00001466	29.9244	0.319598	0.547859	0.583359	0.559652	0.972757	20	34	43	23	18.79	34.62	41.94	24.35
WBGene00001468	161.729	0.296863	0.232916	1.27455	0.202468	0.781515	152	145	194	158	142.78	147.63	189.24	167.27
WBGene00001470	802.5	0.0427386	0.128512	0.332565	0.739463	0.972757	810	806	849	756	760.86	820.64	828.16	800.34
WBGene00001475	945.412	-0.410753	0.123563	-3.32423	0.000886615	0.0182942	1099	1106	836	763	1032.33	1126.09	815.47	807.75
WBGene00001476	851.953	-0.356052	0.126962	-2.8044	0.00504096	0.0728578	1061	900	776	697	996.64	916.35	756.95	737.88
WBGene00001477	81.2534	-1.31022	0.331131	-3.9568	7.59596e-05	0.00238438	109	127	49	43	102.39	129.31	47.8	45.52
WBGene00001478	262.987	-0.165603	0.218357	-0.758408	0.448207	0.972757	317	254	304	188	297.77	258.61	296.54	199.03
WBGene00001479	1103.34	0.11222	0.128379	0.874133	0.382046	0.949172	1130	1041	1285	981	1061.45	1059.91	1253.45	1038.53
WBGene00001480	211.866	-0.120033	0.237431	-0.505547	0.613175	0.972757	279	176	233	169	262.08	179.2	227.28	178.91
WBGene00001481	41.4561	-0.0826322	0.437445	-0.188897	0.850173	0.980606	42	45	37	42	39.45	45.82	36.09	44.46
WBGene00001482	25.8627	0.164937	0.544893	0.302696	0.762121	0.972757	27	23	30	24	25.36	23.42	29.26	25.41
WBGene00001483	4.82279	1.95075	1.34711	1.44809	0.147591	0.67835	1	3	7	8	0.94	3.05	6.83	8.47
WBGene00001484	759.631	0.0356938	0.133258	0.267855	0.788811	0.973176	750	782	781	733	704.5	796.21	761.82	775.99
WBGene00001485	232.188	-0.0205725	0.21808	-0.0943348	0.924843	0.99961	250	229	277	180	234.83	233.16	270.2	190.56
WBGene00001486	15.6139	-0.45338	0.69817	-0.649383	0.516091	0.972757	20	17	14	12	18.79	17.31	13.66	12.7
WBGene00001487	59.4919	0.0589322	0.375495	0.156945	0.875288	0.983422	72	48	67	53	67.63	48.87	65.36	56.11
WBGene00001488	9379.45	-0.271783	0.101736	-2.67147	0.00755199	0.0993241	10316	10637	8147	8549	9690.22	10830.2	7946.97	9050.37
WBGene00001489	1197.71	-0.00350282	0.115715	-0.030271	0.975851	0.99961	1326	1132	1232	1125	1245.56	1152.56	1201.75	1190.98
WBGene00001490	1143.31	-0.0789137	0.116353	-0.678225	0.497629	0.972757	1209	1192	1136	1054	1135.66	1213.65	1108.11	1115.81
WBGene00001491	1804.49	-1.36872	0.106291	-12.877	6.06482e-38	9.31253e-35	2706	2614	1043	942	2541.85	2661.49	1017.39	997.24
WBGene00001492	65.3366	0.322095	0.349013	0.922873	0.356073	0.937956	64	55	74	69	60.12	56	72.18	73.05
WBGene00001493	6916.09	0.122696	0.0984924	1.24574	0.21286	0.788836	6928	6616	6889	7274	6507.74	6736.19	6719.86	7700.59
WBGene00001494	891.966	-0.281299	0.136284	-2.06407	0.0390111	0.316541	979	1019	757	824	919.61	1037.51	738.41	872.32
WBGene00001495	763.223	-0.258832	0.160756	-1.61009	0.107378	0.575606	841	857	594	766	789.98	872.57	579.42	810.92
WBGene00001496	1663.06	-0.120113	0.105221	-1.14153	0.25365	0.847155	1852	1694	1626	1513	1739.66	1724.77	1586.08	1601.73
WBGene00001497	424.397	-0.167565	0.163512	-1.02479	0.305463	0.892552	447	470	434	355	419.88	478.54	423.34	375.82
WBGene00001498	1031.83	-0.812305	0.121155	-6.70466	2.01879e-11	2.81804e-09	1343	1344	771	704	1261.53	1368.42	752.07	745.29
WBGene00001499	266.129	-0.103179	0.187309	-0.550852	0.581735	0.972757	290	274	271	235	272.41	278.98	264.35	248.78
WBGene00001500	105.277	0.0263323	0.281185	0.0936478	0.925389	0.99961	104	109	106	103	97.69	110.98	103.4	109.04
WBGene00001501	1019.02	0.131671	0.129024	1.02051	0.307484	0.894031	946	1038	1074	1023	888.61	1056.86	1047.63	1083
WBGene00001502	10575.4	0.0718546	0.0918659	0.782169	0.434115	0.970028	10957	10147	10536	10769	10292.3	10331.3	10277.3	11400.6
WBGene00001503	3012.34	-0.195877	0.0975171	-2.00865	0.0445747	0.346408	3539	3053	2883	2649	3324.32	3108.46	2812.22	2804.35
WBGene00001505	429.796	-0.0886432	0.162498	-0.545502	0.585408	0.972757	458	448	462	361	430.22	456.14	450.66	382.17
WBGene00001506	123.569	-0.26811	0.295605	-0.906987	0.364414	0.940615	181	98	114	107	170.02	99.78	111.2	113.28
WBGene00001507	7.29784	0.755525	1.02945	0.73391	0.463004	0.972757	4	7	9	9	3.76	7.13	8.78	9.53
WBGene00001508	422.173	0.00623448	0.159281	0.0391413	0.968778	0.99961	462	401	413	419	433.97	408.28	402.86	443.57
WBGene00001509	1068.17	-0.139257	0.11731	-1.18708	0.235196	0.823184	1198	1094	1020	981	1125.33	1113.87	994.96	1038.53
WBGene00001510	762.142	-0.150421	0.128989	-1.16616	0.243551	0.833996	839	801	727	695	788.11	815.55	709.15	735.76
WBGene00001511	160.658	0.742651	0.232719	3.19119	0.00141688	0.0270263	128	118	204	192	120.24	120.14	198.99	203.26
WBGene00001512	234.73	0.0330251	0.205657	0.160584	0.872421	0.983018	220	253	237	230	206.65	257.6	231.18	243.49
WBGene00001513	409.251	0.215366	0.163998	1.31322	0.189108	0.761382	383	391	478	390	359.77	398.1	466.26	412.87
WBGene00001514	49.4874	0.675352	0.423384	1.59513	0.110683	0.584369	39	39	78	43	36.63	39.71	76.08	45.52
WBGene00001515	695.111	-0.00281606	0.135768	-0.0207417	0.983452	0.99961	743	681	672	693	697.93	693.37	655.5	733.64
WBGene00001516	1626.24	-0.0817201	0.10916	-0.748625	0.454083	0.972757	1815	1610	1556	1552	1704.9	1639.25	1517.8	1643.02
WBGene00001517	421.161	0.10212	0.159041	0.642095	0.520812	0.972757	412	418	436	422	387.01	425.59	425.3	446.75
WBGene00001518	673.231	0.0341973	0.148289	0.230613	0.817615	0.978202	706	655	619	717	663.17	666.9	603.8	759.05
WBGene00001519	563.99	-0.0663536	0.147604	-0.449537	0.653044	0.972757	656	528	584	503	616.21	537.59	569.66	532.5
WBGene00001520	2243.28	-0.3545	0.104964	-3.37735	0.000731869	0.0156262	2787	2374	2088	1796	2617.94	2417.13	2036.74	1901.33
WBGene00001522	92.8615	0.387211	0.300118	1.2902	0.196983	0.774246	89	76	117	91	83.6	77.38	114.13	96.34
WBGene00001523	410.289	-0.308435	0.159163	-1.93786	0.0526406	0.383989	479	450	389	334	449.94	458.17	379.45	353.59
WBGene00001526	908.024	0.00137624	0.124991	0.0110107	0.991215	0.99961	941	915	968	824	883.92	931.62	944.23	872.32
WBGene00001527	1557	0.0567537	0.111531	0.50886	0.61085	0.972757	1601	1521	1545	1576	1503.88	1548.63	1507.07	1668.43
WBGene00001528	3.7781	1.09686	1.47097	0.74567	0.455867	0.972757	4	1	3	7	3.76	1.02	2.93	7.41
WBGene00001529	1.28227	0.615946	2.49065	0.247303	0.804674	0.975071	0	2	1	2	0	2.04	0.98	2.12
WBGene00001530	42.5536	-0.0131116	0.447271	-0.0293148	0.976614	0.99961	54	34	36	47	50.72	34.62	35.12	49.76
WBGene00001531	51.0176	0.59378	0.407786	1.45611	0.145362	0.673146	41	42	51	69	38.51	42.76	49.75	73.05
WBGene00001532	123.839	-0.119339	0.265095	-0.450175	0.652584	0.972757	140	124	109	124	131.51	126.25	106.32	131.27
WBGene00001533	42.3818	-0.48832	0.441788	-1.10533	0.269018	0.858044	50	51	29	40	46.97	51.93	28.29	42.35
WBGene00001534	93.2115	-0.184698	0.305082	-0.605405	0.54491	0.972757	91	111	93	79	85.48	113.02	90.72	83.63
WBGene00001535	214.812	0.113819	0.219773	0.517895	0.604532	0.972757	187	233	221	218	175.66	237.23	215.57	230.78
WBGene00001536	151.382	-0.0244609	0.239512	-0.102128	0.918655	0.998854	157	155	145	150	147.48	157.82	141.44	158.8
WBGene00001537	911.112	-0.0410187	0.124288	-0.33003	0.741377	0.972757	954	935	893	874	896.13	951.99	871.08	925.26
WBGene00001538	2110.33	-0.132195	0.109822	-1.20372	0.228698	0.814511	2302	2212	2205	1772	2162.36	2252.18	2150.86	1875.92
WBGene00001539	24.8005	0.0113348	0.571299	0.0198403	0.984171	0.99961	33	18	24	25	31	18.33	23.41	26.47
WBGene00001540	59.8643	-0.480953	0.372823	-1.29003	0.19704	0.774246	79	64	44	54	74.21	65.16	42.92	57.17
WBGene00001541	599.868	0.246569	0.144781	1.70305	0.0885593	0.520509	540	580	667	615	507.24	590.54	650.62	651.07
WBGene00001542	84.2488	0.390117	0.311	1.25439	0.209699	0.785931	74	75	95	93	69.51	76.36	92.67	98.45
WBGene00001543	270.657	-0.114585	0.193171	-0.593179	0.553062	0.972757	329	249	264	248	309.04	253.52	257.52	262.54
WBGene00001544	215.836	-0.0830833	0.214319	-0.387662	0.698266	0.972757	233	221	188	223	218.87	225.01	183.38	236.08
WBGene00001545	38.8264	-0.137431	0.465567	-0.29519	0.767849	0.972757	54	30	39	34	50.72	30.54	38.04	35.99
WBGene00001546	306.787	0.0944369	0.179583	0.525868	0.59898	0.972757	296	310	326	298	278.04	315.63	318	315.48
WBGene00001547	209.884	-0.023188	0.205704	-0.112725	0.910249	0.994787	225	208	212	198	211.35	211.78	206.79	209.61
WBGene00001548	255.736	-0.152136	0.191274	-0.795384	0.42639	0.966507	285	266	260	218	267.71	270.83	253.62	230.78
WBGene00001549	67.984	-0.27921	0.346938	-0.804784	0.420944	0.964893	71	81	64	57	66.69	82.47	62.43	60.34
WBGene00001550	45.3232	-0.0253399	0.431627	-0.0587078	0.953185	0.99961	56	38	38	50	52.6	38.69	37.07	52.93
WBGene00001551	55.09	0.0711381	0.37829	0.188052	0.850836	0.981026	58	52	55	56	54.48	52.94	53.65	59.28
WBGene00001552	101.227	0.363677	0.288563	1.2603	0.20756	0.783789	90	91	126	99	84.54	92.65	122.91	104.81
WBGene00001553	82.0517	0.10845	0.321055	0.337792	0.73552	0.972757	74	87	93	75	69.51	88.58	90.72	79.4
WBGene00001554	62.4355	0.275418	0.369289	0.745807	0.455784	0.972757	50	65	76	59	46.97	66.18	74.13	62.46
WBGene00001555	302.571	0.498375	0.179952	2.76949	0.00561442	0.0792123	260	253	379	320	244.23	257.6	369.69	338.77
WBGene00001556	117.182	0.49934	0.280387	1.78089	0.0749298	0.474127	105	94	163	109	98.63	95.71	159	115.39
WBGene00001557	117.419	0.119615	0.266827	0.448288	0.653946	0.972757	114	116	128	113	107.08	118.11	124.86	119.63
WBGene00001558	3893.07	0.0692788	0.0921999	0.751397	0.452414	0.972757	4046	3731	4132	3724	3800.56	3798.78	4030.55	3942.4
WBGene00001559	1114.38	0.117732	0.121257	0.970933	0.331582	0.920001	1198	994	1150	1132	1125.33	1012.06	1121.77	1198.39
WBGene00001560	1942.37	-0.175947	0.109713	-1.60371	0.108779	0.578459	2205	2013	1749	1835	2071.24	2049.57	1706.06	1942.62
WBGene00001561	2791.59	0.074016	0.106199	0.696956	0.485831	0.972757	2766	2791	2771	2856	2598.21	2841.7	2702.97	3023.49
WBGene00001562	2193.89	-0.0967273	0.106954	-0.904381	0.365794	0.941862	2369	2268	2047	2120	2225.29	2309.2	1996.74	2244.33
WBGene00001563	978.445	-0.00932397	0.123328	-0.0756031	0.939735	0.99961	1000	1006	1029	894	939.34	1024.28	1003.74	946.43
WBGene00001564	39112.6	-0.94395	0.0908436	-10.3909	2.72645e-25	1.43536e-22	52877	52322	28701	24099	49669.4	53272.5	27996.3	25512.3
WBGene00001565	1873.4	-0.149325	0.1101	-1.35627	0.175014	0.736265	2055	1974	1711	1780	1930.34	2009.86	1668.99	1884.39
WBGene00001566	151.127	0.23642	0.245551	0.962815	0.335641	0.923937	134	149	155	166	125.87	151.71	151.19	175.74
WBGene00001568	488.738	-0.0680365	0.148076	-0.45947	0.645897	0.972757	534	490	489	451	501.61	498.9	476.99	477.45
WBGene00001569	144.52	-0.100735	0.25841	-0.389828	0.696664	0.972757	186	122	144	131	174.72	124.22	140.46	138.68
WBGene00001570	548.179	0.220024	0.148212	1.48452	0.137672	0.65515	575	464	588	573	540.12	472.43	573.56	606.6
WBGene00001571	95.1469	0.227277	0.294437	0.771903	0.440172	0.971517	87	92	104	98	81.72	93.67	101.45	103.75
WBGene00001572	1427.31	0.138336	0.120649	1.14659	0.25155	0.844816	1393	1384	1414	1523	1308.5	1409.14	1379.28	1612.32
WBGene00001574	4084.98	-0.0754816	0.0937818	-0.804864	0.420898	0.964893	4379	4194	3975	3853	4113.36	4270.19	3877.41	4078.96
WBGene00001575	39.7163	-0.31333	0.445662	-0.703067	0.482014	0.972757	45	45	40	30	42.27	45.82	39.02	31.76
WBGene00001577	687.779	0.737803	0.140947	5.23461	1.6533e-07	1.08411e-05	554	502	950	749	520.39	511.12	926.68	792.93
WBGene00001578	1020.79	-0.0576363	0.118615	-0.485909	0.627032	0.972757	1110	1021	1004	965	1042.67	1039.55	979.35	1021.59
WBGene00001579	489.083	0.0878856	0.148232	0.592892	0.553254	0.972757	511	460	520	473	480	468.36	507.23	500.74
WBGene00001580	616.952	-0.062619	0.15124	-0.414036	0.678848	0.972757	720	574	672	521	676.32	584.43	655.5	551.55
WBGene00001581	3586.78	-0.639341	0.0956526	-6.684	2.32515e-11	3.19725e-09	4571	4365	2960	2571	4293.72	4444.3	2887.33	2721.78
WBGene00001582	1239.97	0.0581826	0.115009	0.505898	0.612928	0.972757	1273	1212	1248	1240	1195.78	1234.02	1217.36	1312.72
WBGene00001583	267.043	0.386108	0.188461	2.04874	0.0404873	0.325063	250	224	296	299	234.83	228.07	288.73	316.54
WBGene00001584	507.944	0.191417	0.146938	1.30271	0.192673	0.767681	495	475	545	521	464.97	483.63	531.62	551.55
WBGene00001585	172.644	0.0106451	0.224036	0.0475149	0.962103	0.99961	183	169	173	168	171.9	172.07	168.75	177.85
WBGene00001586	275.806	0.163711	0.193945	0.844112	0.398607	0.957104	258	273	272	300	242.35	277.96	265.32	317.59
WBGene00001587	256.6	0.324862	0.201495	1.61226	0.106905	0.574793	269	199	274	287	252.68	202.62	267.27	303.83
WBGene00001588	196.351	0.122421	0.214131	0.57171	0.567518	0.972757	188	196	209	194	176.6	199.56	203.87	205.38
WBGene00001589	526.278	0.034105	0.145523	0.234361	0.814704	0.977815	546	518	562	488	512.88	527.41	548.2	516.62
WBGene00001590	81.4392	-0.183261	0.315353	-0.581131	0.561152	0.972757	89	88	75	75	83.6	89.6	73.16	79.4
WBGene00001591	790.422	-0.0191156	0.131434	-0.145438	0.884365	0.98467	864	766	850	700	811.59	779.92	829.13	741.05
WBGene00001592	460.732	0.21053	0.158008	1.33239	0.182731	0.750723	468	407	469	502	439.61	414.39	457.49	531.44
WBGene00001593	197.276	-0.243064	0.215851	-1.12607	0.260134	0.852874	234	204	171	184	219.81	207.71	166.8	194.79
WBGene00001594	517.966	-0.0221134	0.145446	-0.152039	0.879156	0.983716	551	517	535	478	517.58	526.39	521.86	506.03
WBGene00001595	94.8983	1.43133	0.303387	4.71784	2.38367e-06	0.000118387	53	52	146	127	49.78	52.94	142.42	134.45
WBGene00001596	1615.44	-0.162063	0.109898	-1.47466	0.140303	0.661013	1735	1751	1587	1418	1629.75	1782.81	1548.04	1501.16
WBGene00001597	164.751	0.821703	0.246419	3.33457	0.000854311	0.0177269	129	115	249	168	121.17	117.09	242.89	177.85
WBGene00001598	182.245	0.351087	0.219733	1.59779	0.11009	0.581903	172	156	217	186	161.57	158.83	211.67	196.91
WBGene00001599	51.3726	0.732597	0.401228	1.82589	0.0678676	0.445503	40	39	75	52	37.57	39.71	73.16	55.05
WBGene00001600	63.6364	0.299315	0.383788	0.779898	0.435451	0.970028	51	65	55	82	47.91	66.18	53.65	86.81
WBGene00001601	42.8371	0.156166	0.42583	0.366734	0.713817	0.972757	44	39	47	42	41.33	39.71	45.85	44.46
WBGene00001602	430.247	0.182221	0.165452	1.10135	0.270745	0.859684	385	437	474	427	361.65	444.94	462.36	452.04
WBGene00001603	0.743918	-2.98963	3.31612	-0.901546	0.367298	0.941862	1	2	0	0	0.94	2.04	0	0
WBGene00001604	5852.15	-0.448893	0.0912685	-4.91838	8.72646e-07	4.84358e-05	7100	6719	4913	4823	6669.3	6841.06	4792.38	5105.85
WBGene00001606	38.3674	0.01358	0.476763	0.0284837	0.977276	0.99961	53	26	39	37	49.78	26.47	38.04	39.17
WBGene00001607	124.098	0.993988	0.264154	3.76291	0.00016795	0.00464494	91	79	176	150	85.48	80.44	171.68	158.8
WBGene00001608	213.356	0.254009	0.207886	1.22186	0.22176	0.805005	204	194	222	234	191.63	197.52	216.55	247.72
WBGene00001609	142.33	0.767184	0.248429	3.08814	0.00201412	0.0361014	117	99	194	160	109.9	100.8	189.24	169.38
WBGene00001612	188.461	0.0325637	0.225582	0.144354	0.885221	0.984931	210	172	174	200	197.26	175.12	169.73	211.73
WBGene00001613	143.385	0.299846	0.243505	1.23137	0.218183	0.799094	135	128	167	145	126.81	130.33	162.9	153.5
WBGene00001614	61.6702	0.340285	0.368242	0.924081	0.355444	0.937104	53	58	61	74	49.78	59.05	59.5	78.34
WBGene00001615	795.097	-0.24267	0.126872	-1.91271	0.0557852	0.396565	920	844	736	698	864.19	859.33	717.93	738.94
WBGene00001616	544.44	-0.198461	0.143295	-1.38498	0.16606	0.717078	607	583	524	475	570.18	593.59	511.13	502.86
WBGene00001617	350.558	-0.0158371	0.17649	-0.0897339	0.928499	0.99961	410	314	372	316	385.13	319.7	362.87	334.53
WBGene00001618	36.0692	-0.332931	0.468609	-0.710467	0.477415	0.972757	38	44	35	28	35.69	44.8	34.14	29.64
WBGene00001619	26.2742	-0.476619	0.561436	-0.848927	0.395922	0.955916	25	37	19	24	23.48	37.67	18.53	25.41
WBGene00001620	1253.12	-0.691865	0.124292	-5.56646	2.59961e-08	1.99127e-06	1663	1507	1071	823	1562.12	1534.38	1044.7	871.27
WBGene00001621	505.542	-0.361118	0.150728	-2.39583	0.0165827	0.173923	587	575	429	441	551.39	585.45	418.47	466.86
WBGene00001622	400.482	-0.0439013	0.160696	-0.273195	0.784704	0.973067	416	415	408	369	390.76	422.54	397.98	390.64
WBGene00001623	177.34	-0.934635	0.241871	-3.86418	0.000111462	0.00328082	215	259	112	127	201.96	263.71	109.25	134.45
WBGene00001624	103.225	-0.156096	0.302429	-0.516142	0.605755	0.972757	123	100	80	111	115.54	101.82	78.04	117.51
WBGene00001625	125.892	-0.155584	0.259002	-0.600705	0.548036	0.972757	147	125	127	108	138.08	127.27	123.88	114.33
WBGene00001626	27.228	-0.00381993	0.543009	-0.00703475	0.994387	0.99961	31	25	34	20	29.12	25.45	33.17	21.17
WBGene00001627	257.825	-0.306415	0.192492	-1.59183	0.111423	0.586427	294	289	250	205	276.17	294.25	243.86	217.02
WBGene00001628	558.041	-0.0817262	0.14963	-0.546189	0.584936	0.972757	642	535	594	477	603.06	544.72	579.42	504.97
WBGene00001629	585.788	-0.127031	0.143682	-0.884114	0.376634	0.945536	685	569	556	546	643.45	579.34	542.35	578.02
WBGene00001630	1081.99	0.323265	0.12186	2.65277	0.00798339	0.102869	1055	915	1297	1077	991	931.62	1265.16	1140.16
WBGene00001631	881.886	-0.354564	0.136215	-2.60296	0.00924215	0.113606	1024	999	716	803	961.88	1017.15	698.42	850.09
WBGene00001632	757.607	0.191528	0.132892	1.44122	0.149521	0.683541	797	654	835	757	748.65	665.88	814.5	801.4
WBGene00001633	114.275	-0.445232	0.279045	-1.59556	0.110588	0.584031	158	113	103	88	148.42	115.05	100.47	93.16
WBGene00001635	453.207	-0.0771885	0.153546	-0.502707	0.615171	0.972757	502	451	468	402	471.55	459.19	456.51	425.58
WBGene00001636	95.4746	0.186847	0.297087	0.628933	0.529393	0.972757	97	86	115	86	91.12	87.56	112.18	91.04
WBGene00001637	175.737	-0.15498	0.225739	-0.686545	0.492369	0.972757	211	169	175	153	198.2	172.07	170.7	161.97
WBGene00001638	295.728	-0.00286894	0.180819	-0.0158664	0.987341	0.99961	315	291	318	265	295.89	296.29	310.19	280.54
WBGene00001639	6.90706	-1.27591	1.07315	-1.18894	0.234463	0.822048	10	10	5	3	9.39	10.18	4.88	3.18
WBGene00001640	0.529323	2.54957	4.13207	0.61702	0.537221	0.972757	0	0	0	2	0	0	0	2.12
WBGene00001641	0	NA	NA	NA	NA	NA	0	0	0	0	0	0	0	0
WBGene00001642	0.763625	-3.02351	3.56721	-0.847584	0.39667	0.955916	0	3	0	0	0	3.05	0	0
WBGene00001643	68.9756	-0.379033	0.343073	-1.10482	0.269239	0.858192	89	71	59	59	83.6	72.29	57.55	62.46
WBGene00001644	117.568	-0.343346	0.286412	-1.19878	0.230612	0.815854	155	115	88	115	145.6	117.09	85.84	121.74
WBGene00001645	533.7	-0.194207	0.148452	-1.30821	0.190802	0.764285	606	560	544	439	569.24	570.17	530.64	464.75
WBGene00001646	36.7937	0.120442	0.47209	0.255125	0.798626	0.973856	34	38	47	29	31.94	38.69	45.85	30.7
WBGene00001647	46.6028	0.81389	0.435888	1.8672	0.0618739	0.423026	32	37	75	43	30.06	37.67	73.16	45.52
WBGene00001648	2584.39	0.0122243	0.0974116	0.125491	0.900135	0.990614	2710	2555	2672	2441	2545.61	2601.41	2606.4	2584.16
WBGene00001649	582.67	-0.389818	0.141411	-2.75664	0.00583991	0.0817676	705	648	537	458	662.23	659.77	523.82	484.86
WBGene00001650	1106.15	-0.108083	0.121167	-0.892016	0.372384	0.943722	1292	1062	1111	988	1213.63	1081.29	1083.72	1045.94
WBGene00001651	1500.23	-0.475881	0.112716	-4.22197	2.42181e-05	0.000899682	1769	1797	1316	1158	1661.69	1829.64	1283.69	1225.91
WBGene00001653	403.344	0.174376	0.185576	0.93965	0.347397	0.933068	416	361	513	335	390.76	367.56	500.4	354.65
WBGene00001660	462.935	-0.396785	0.155098	-2.55829	0.0105189	0.124484	557	520	435	354	523.21	529.45	424.32	374.76
WBGene00001661	245.592	-0.0186921	0.221512	-0.0843841	0.932751	0.99961	288	220	295	189	270.53	224	287.76	200.08
WBGene00001662	898.182	-0.226744	0.125779	-1.80272	0.0714329	0.460956	982	997	859	772	922.43	1015.11	837.91	817.27
WBGene00001663	108.21	-0.165642	0.275868	-0.600439	0.548214	0.972757	119	115	106	95	111.78	117.09	103.4	100.57
WBGene00001664	196.499	0.0281677	0.226741	0.124229	0.901134	0.990857	221	178	176	213	207.59	181.23	171.68	225.49
WBGene00001665	164.814	-0.103753	0.22915	-0.452775	0.650711	0.972757	175	174	164	149	164.38	177.16	159.97	157.74
WBGene00001666	49.5712	-0.0766286	0.397447	-0.192802	0.847114	0.980606	52	52	49	46	48.85	52.94	47.8	48.7
WBGene00001667	8.71644	-0.0296245	0.924143	-0.0320562	0.974427	0.99961	9	9	9	8	8.45	9.16	8.78	8.47
WBGene00001668	42.4814	-0.0348668	0.431533	-0.0807976	0.935603	0.99961	45	43	48	35	42.27	43.78	46.82	37.05
WBGene00001669	506.34	0.000482205	0.151295	0.00318718	0.997457	0.99961	533	503	554	446	500.67	512.14	540.4	472.16
WBGene00001670	84.0499	-0.00434453	0.311002	-0.0139695	0.988854	0.99961	86	86	82	83	80.78	87.56	79.99	87.87
WBGene00001671	173.511	-0.484614	0.224306	-2.1605	0.0307339	0.27044	212	202	150	135	199.14	205.67	146.32	142.92
WBGene00001672	59.0889	0.445892	0.379586	1.17468	0.240122	0.830734	63	40	65	69	59.18	40.73	63.4	73.05
WBGene00001673	76.5584	-0.182036	0.327664	-0.555557	0.578514	0.972757	79	87	70	71	74.21	88.58	68.28	75.16
WBGene00001674	250.449	-0.606661	0.195286	-3.10653	0.00189294	0.0342626	322	297	217	175	302.47	302.4	211.67	185.26
WBGene00001675	25.9377	0.731891	0.549867	1.33103	0.183178	0.751388	22	18	36	28	20.67	18.33	35.12	29.64
WBGene00001676	218.326	0.0345796	0.208736	0.165662	0.868423	0.983018	208	232	226	209	195.38	236.21	220.45	221.26
WBGene00001677	99.9036	-0.136242	0.296651	-0.459266	0.646043	0.972757	96	117	92	95	90.18	119.13	89.74	100.57
WBGene00001678	127.57	-0.0369876	0.256861	-0.143999	0.885501	0.984931	131	133	129	119	123.05	135.42	125.83	125.98
WBGene00001679	3933.02	0.0344643	0.107867	0.319509	0.749341	0.972757	3910	4026	3790	4027	3672.81	4099.14	3696.95	4263.17
WBGene00001680	793.374	-0.359458	0.128734	-2.79227	0.005234	0.074978	959	867	739	632	900.83	882.75	720.86	669.06
WBGene00001681	65.9117	0.087049	0.347847	0.250251	0.802393	0.974363	70	61	73	61	65.75	62.11	71.21	64.58
WBGene00001682	365.446	0.610862	0.169281	3.60857	0.000307892	0.00767688	311	281	425	443	292.13	286.1	414.57	468.98
WBGene00001683	67.7853	0.970006	0.361213	2.68541	0.00724408	0.0966025	51	43	108	70	47.91	43.78	105.35	74.11
WBGene00001684	6444.4	-0.283537	0.10236	-2.76999	0.00560579	0.0792119	7451	7024	5473	5940	6999.01	7151.6	5338.63	6288.36
WBGene00001685	10826.9	-0.552258	0.0948353	-5.82334	5.76828e-09	4.98997e-07	12981	13313	8685	8584	12193.6	13554.9	8471.77	9087.42
WBGene00001686	32.1706	0.720562	0.498965	1.44411	0.148707	0.681441	30	20	42	37	28.18	20.36	40.97	39.17
WBGene00001687	91.3986	0.241788	0.322861	0.748892	0.453922	0.972757	68	102	103	92	63.88	103.85	100.47	97.4
WBGene00001688	27.5545	-0.0805353	0.530906	-0.151694	0.879428	0.983716	30	28	31	22	28.18	28.51	30.24	23.29
WBGene00001689	22.1248	0.389787	0.602301	0.647163	0.517526	0.972757	18	21	20	29	16.91	21.38	19.51	30.7
WBGene00001690	16.5064	-0.303091	0.689455	-0.439609	0.66022	0.972757	15	22	14	15	14.09	22.4	13.66	15.88
WBGene00001691	6.11683	1.33432	1.17123	1.13925	0.254597	0.847581	2	5	6	11	1.88	5.09	5.85	11.65
WBGene00001692	36.1284	-0.938459	0.545181	-1.72137	0.0851835	0.508782	75	24	27	22	70.45	24.44	26.34	23.29
WBGene00001693	0	NA	NA	NA	NA	NA	0	0	0	0	0	0	0	0
WBGene00001694	65.5986	-0.00849978	0.362955	-0.0234183	0.981317	0.99961	62	72	56	72	58.24	73.31	54.63	76.22
WBGene00001695	44.0598	0.103815	0.420149	0.247092	0.804837	0.975071	46	41	48	42	43.21	41.74	46.82	44.46
WBGene00001696	16.3843	0.236185	0.686155	0.344215	0.730685	0.972757	19	12	19	16	17.85	12.22	18.53	16.94
WBGene00001697	2.70768	0.862571	1.68634	0.511504	0.608998	0.972757	3	1	5	2	2.82	1.02	4.88	2.12
WBGene00001698	4.01924	0.373263	1.42688	0.261594	0.793634	0.973263	1	6	6	3	0.94	6.11	5.85	3.18
WBGene00001699	46.805	-0.190033	0.408839	-0.464813	0.642065	0.972757	52	50	43	43	48.85	50.91	41.94	45.52
WBGene00001700	8.19667	0.321807	0.957686	0.336026	0.736851	0.972757	9	6	10	8	8.45	6.11	9.75	8.47
WBGene00001701	52.9004	0.254577	0.391647	0.650017	0.515681	0.972757	56	43	53	60	52.6	43.78	51.7	63.52
WBGene00001702	92.2473	0.30937	0.31193	0.991794	0.321298	0.909686	95	74	88	112	89.24	75.34	85.84	118.57
WBGene00001703	33.1143	0.533653	0.494614	1.07893	0.28062	0.870202	23	32	39	38	21.6	32.58	38.04	40.23
WBGene00001704	4.69061	0.796374	1.3245	0.601262	0.547665	0.972757	3	4	10	2	2.82	4.07	9.75	2.12
WBGene00001705	19.1492	0.925337	0.649934	1.42374	0.154522	0.694443	14	13	20	29	13.15	13.24	19.51	30.7
WBGene00001707	676.162	0.0252364	0.14672	0.172003	0.863435	0.982229	708	663	624	714	665.05	675.04	608.68	755.87
WBGene00001708	916.825	0.0597151	0.127971	0.466629	0.640765	0.972757	923	912	903	936	867.01	928.57	880.83	990.89
WBGene00001709	962.693	0.165369	0.122925	1.34529	0.178533	0.743587	989	870	1003	999	929.01	885.8	978.37	1057.59
WBGene00001710	65.4732	0.489613	0.365014	1.34135	0.179806	0.745356	67	45	68	82	62.94	45.82	66.33	86.81
WBGene00001711	4.79408	0.184159	1.28017	0.143855	0.885615	0.984931	2	7	5	5	1.88	7.13	4.88	5.29
WBGene00001712	4.72814	-1.40961	1.33004	-1.05982	0.289225	0.877797	7	7	1	4	6.58	7.13	0.98	4.23
WBGene00001713	1103.8	-0.234666	0.144716	-1.62156	0.104898	0.569822	1259	1182	882	1104	1182.63	1203.47	860.35	1168.75
WBGene00001714	34.629	-0.292343	0.478765	-0.610619	0.541452	0.972757	41	37	27	34	38.51	37.67	26.34	35.99
WBGene00001715	33.5848	0.146117	0.497982	0.293418	0.769203	0.972757	29	36	44	26	27.24	36.65	42.92	27.52
WBGene00001716	96.217	-0.284395	0.314258	-0.904973	0.36548	0.941845	137	81	88	83	128.69	82.47	85.84	87.87
WBGene00001717	55.9158	-0.167716	0.377206	-0.444628	0.656589	0.972757	61	60	58	46	57.3	61.09	56.58	48.7
WBGene00001718	37.5647	-0.178771	0.471515	-0.379142	0.704582	0.972757	34	47	31	38	31.94	47.85	30.24	40.23
WBGene00001719	49.4919	-0.315316	0.407676	-0.773448	0.439257	0.970823	68	45	46	41	63.88	45.82	44.87	43.4
WBGene00001720	2.99426	-0.956173	1.59137	-0.600847	0.547942	0.972757	3	5	2	2	2.82	5.09	1.95	2.12
WBGene00001721	12.6853	-0.0694163	0.854629	-0.0812239	0.935264	0.99961	6	20	8	16	5.64	20.36	7.8	16.94
WBGene00001722	7.61531	1.07419	1.03842	1.03444	0.300929	0.888467	5	5	6	14	4.7	5.09	5.85	14.82
WBGene00001723	68.5842	0.791103	0.386674	2.04592	0.0407644	0.326599	72	32	83	88	67.63	32.58	80.96	93.16
WBGene00001724	16.1846	-0.672421	0.734253	-0.91579	0.359777	0.939925	24	17	19	6	22.54	17.31	18.53	6.35
WBGene00001725	323.635	0.346898	0.182898	1.89668	0.0578707	0.406689	290	292	335	376	272.41	297.3	326.78	398.05
WBGene00001726	1.5182	0.113206	2.3131	0.0489412	0.960966	0.99961	2	1	0	3	1.88	1.02	0	3.18
WBGene00001727	6.01997	-0.163251	1.13874	-0.143361	0.886005	0.985246	7	6	3	8	6.58	6.11	2.93	8.47
WBGene00001728	0.487724	2.4463	4.26839	0.57312	0.566563	0.972757	0	0	2	0	0	0	1.95	0
WBGene00001729	1.21931	3.76779	2.99967	1.25607	0.209091	0.785146	0	0	5	0	0	0	4.88	0
WBGene00001730	284.499	0.909688	0.225143	4.0405	5.33385e-05	0.00174568	221	184	294	431	207.59	187.34	286.78	456.28
WBGene00001731	0.234835	-1.3705	4.99454	-0.274399	0.783778	0.972757	1	0	0	0	0.94	0	0	0
WBGene00001732	0.763065	1.02936	3.16242	0.325498	0.744804	0.972757	0	1	1	1	0	1.02	0.98	1.06
WBGene00001733	1.03841	0.0560324	2.91228	0.01924	0.98465	0.99961	0	2	0	2	0	2.04	0	2.12
WBGene00001734	0.254542	-1.42918	4.99047	-0.286382	0.774585	0.972757	0	1	0	0	0	1.02	0	0
WBGene00001735	0.975448	3.44599	3.24785	1.06101	0.288686	0.877526	0	0	4	0	0	0	3.9	0
WBGene00001736	0.773185	3.10047	3.27119	0.947812	0.343225	0.929082	0	0	1	2	0	0	0.98	2.12
WBGene00001737	0	NA	NA	NA	NA	NA	0	0	0	0	0	0	0	0
WBGene00001738	0	NA	NA	NA	NA	NA	0	0	0	0	0	0	0	0
WBGene00001739	1.01705	3.49884	2.93235	1.19318	0.232797	0.818672	0	0	2	2	0	0	1.95	2.12
WBGene00001740	129.415	-0.143442	0.260035	-0.551625	0.581205	0.972757	130	147	124	118	122.11	149.67	120.96	124.92
WBGene00001743	432.772	0.365087	0.180836	2.01888	0.0434995	0.340293	345	425	454	502	324.07	432.72	442.85	531.44
WBGene00001744	770.602	0.279555	0.135014	2.07056	0.0384002	0.314332	782	646	910	758	734.56	657.74	887.66	802.45
WBGene00001745	954.298	-0.228376	0.129648	-1.76152	0.0781511	0.485609	1057	1048	968	768	992.88	1067.04	944.23	813.04
WBGene00001746	1164.39	-0.0757782	0.12039	-0.629438	0.529062	0.972757	1204	1237	1202	1034	1130.96	1259.47	1172.49	1094.64
WBGene00001747	1270.45	-0.0517938	0.115004	-0.450364	0.652448	0.972757	1325	1318	1247	1208	1244.62	1341.94	1216.38	1278.84
WBGene00001748	12048.2	-0.109745	0.109869	-0.998869	0.317858	0.904643	12988	12583	10577	12151	12200.1	12811.6	10317.3	12863.6
WBGene00001749	2169.64	-0.442937	0.106267	-4.16816	3.07062e-05	0.00110556	2808	2320	1871	1751	2637.66	2362.15	1825.06	1853.69
WBGene00001750	71.1124	-0.528176	0.338092	-1.56223	0.118234	0.6055	90	82	64	51	84.54	83.49	62.43	53.99
WBGene00001751	316.905	-0.758199	0.191747	-3.95415	7.68057e-05	0.00240275	457	361	271	195	429.28	367.56	264.35	206.44
WBGene00001752	121.288	-0.788317	0.272458	-2.89335	0.0038116	0.0593239	169	146	103	73	158.75	148.65	100.47	77.28
WBGene00001753	3154.16	0.0358557	0.0976996	0.366999	0.713619	0.972757	3380	3000	3164	3118	3174.96	3054.5	3086.32	3300.86
WBGene00001754	741.733	0.204423	0.136371	1.49902	0.133868	0.645047	680	727	827	738	638.75	740.21	806.7	781.28
WBGene00001755	1715.06	-0.0630942	0.126789	-0.497631	0.618744	0.972757	1897	1693	1925	1395	1781.93	1723.76	1877.74	1476.81
WBGene00001756	34.3078	-0.643032	0.498495	-1.28995	0.197069	0.774246	35	50	32	21	32.88	50.91	31.21	22.23
WBGene00001757	13.9983	-0.495423	0.766565	-0.64629	0.518092	0.972757	24	10	13	10	22.54	10.18	12.68	10.59
WBGene00001758	301.812	-0.0803773	0.179146	-0.448668	0.653671	0.972757	333	302	287	290	312.8	307.49	279.95	307.01
WBGene00001759	100.097	0.242909	0.292731	0.829803	0.40665	0.957632	104	84	100	113	97.69	85.53	97.54	119.63
WBGene00001760	299.092	0.399738	0.185798	2.15146	0.0314399	0.274946	259	268	375	297	243.29	272.87	365.79	314.42
WBGene00001761	482.066	-0.102453	0.150167	-0.682256	0.495077	0.972757	550	473	477	439	516.64	481.59	465.29	464.75
WBGene00001762	82.7782	-0.311512	0.330233	-0.94331	0.345522	0.931918	116	73	81	65	108.96	74.33	79.01	68.81
WBGene00001763	136.947	-0.0705613	0.262139	-0.269175	0.787795	0.973176	131	155	151	113	123.05	157.82	147.29	119.63
WBGene00001764	99.5969	-0.235722	0.289771	-0.813477	0.415945	0.962199	123	98	90	90	115.54	99.78	87.79	95.28
WBGene00001765	2.6598	-0.739456	1.73893	-0.425237	0.670664	0.972757	6	1	3	1	5.64	1.02	2.93	1.06
WBGene00001766	1.76206	0.50555	2.04596	0.247096	0.804834	0.975071	2	1	1	3	1.88	1.02	0.98	3.18
WBGene00001767	49.8089	-0.569667	0.399	-1.42774	0.153368	0.692635	66	56	41	38	62	57.02	39.99	40.23
WBGene00001768	1659.9	-0.834931	0.10994	-7.59439	3.09238e-14	6.78335e-12	2298	2058	1165	1180	2158.6	2095.39	1136.4	1249.2
WBGene00001769	22.5483	0.32641	0.6069	0.537831	0.590694	0.972757	21	20	34	16	19.73	20.36	33.17	16.94
WBGene00001770	160.343	0.270472	0.235169	1.15012	0.250094	0.842919	146	151	190	156	137.14	153.74	185.34	165.15
WBGene00001771	75.8583	-0.331416	0.333914	-0.992518	0.320945	0.909665	88	85	79	54	82.66	86.54	77.06	57.17
WBGene00001772	368.731	-0.00572824	0.165076	-0.0347007	0.972318	0.99961	392	364	365	359	368.22	370.61	356.04	380.05
WBGene00001773	8.00013	1.19625	0.991417	1.20661	0.227584	0.813318	6	4	12	10	5.64	4.07	11.71	10.59
WBGene00001774	74.7374	-0.068266	0.329476	-0.207196	0.835857	0.979679	87	70	78	66	81.72	71.27	76.08	69.87
WBGene00001775	460.259	-0.775211	0.166439	-4.65763	3.19871e-06	0.000154697	549	635	341	327	515.7	646.54	332.63	346.18
WBGene00001776	71.5096	0.236488	0.342968	0.689535	0.490486	0.972757	78	57	87	66	73.27	58.04	84.86	69.87
WBGene00001777	7.47523	-0.534694	1.00533	-0.531858	0.594825	0.972757	8	10	6	6	7.51	10.18	5.85	6.35
WBGene00001778	123.476	-0.544827	0.268822	-2.02672	0.0426911	0.336165	160	140	90	107	150.29	142.54	87.79	113.28
WBGene00001779	113.547	-0.352265	0.281452	-1.2516	0.210716	0.787119	154	108	108	89	144.66	109.96	105.35	94.22
WBGene00001780	2.23229	-1.71294	1.98526	-0.862825	0.388234	0.95245	4	3	0	2	3.76	3.05	0	2.12
WBGene00001781	180.876	-0.264576	0.221876	-1.19245	0.233084	0.818839	211	193	158	165	198.2	196.51	154.12	174.68
WBGene00001782	46.2041	-0.807751	0.418815	-1.92866	0.0537733	0.388068	58	62	32	34	54.48	63.13	31.21	35.99
WBGene00001783	915.714	0.491511	0.15386	3.19454	0.00140053	0.0267698	931	636	1181	934	874.52	647.55	1152	988.78
WBGene00001784	566.007	-0.422152	0.155152	-2.72089	0.00651063	0.0885233	759	573	521	434	712.96	583.41	508.21	459.45
WBGene00001785	81.3429	-0.231164	0.345	-0.67004	0.502832	0.972757	85	94	57	89	79.84	95.71	55.6	94.22
WBGene00001786	138.687	0.0761159	0.247486	0.307556	0.75842	0.972757	139	137	141	139	130.57	139.49	137.54	147.15
WBGene00001787	418.547	0.236743	0.163957	1.44394	0.148757	0.681501	433	355	435	455	406.73	361.45	424.32	481.68
WBGene00001788	138.464	-0.250702	0.246782	-1.01588	0.309684	0.8958	161	147	128	121	151.23	149.67	124.86	128.1
WBGene00001789	73.9726	-0.514958	0.356379	-1.44497	0.148466	0.68079	79	98	49	70	74.21	99.78	47.8	74.11
WBGene00001790	380.963	0.15124	0.168549	0.897309	0.369554	0.943261	413	328	426	365	387.95	333.96	415.54	386.41
WBGene00001791	96.5034	0.263079	0.294793	0.892422	0.372167	0.943722	99	81	116	92	92.99	82.47	113.15	97.4
WBGene00001792	10.5225	1.37151	0.873346	1.5704	0.116321	0.600043	6	6	17	13	5.64	6.11	16.58	13.76
WBGene00001793	910.415	-0.163712	0.128739	-1.27165	0.203496	0.783095	1094	880	867	824	1027.64	895.99	845.71	872.32
WBGene00001794	3433.24	-0.231432	0.0970196	-2.38541	0.0170601	0.176979	3872	3712	3353	2877	3637.12	3779.43	3270.68	3045.73
WBGene00001795	2221.54	-0.0962051	0.11363	-0.846654	0.397188	0.956302	2269	2416	2087	2134	2131.36	2459.89	2035.76	2259.15
WBGene00001796	231.134	-0.138229	0.198762	-0.69545	0.486774	0.972757	263	233	218	215	247.05	237.23	212.65	227.61
WBGene00001803	910.476	-0.0542817	0.132217	-0.410549	0.681403	0.972757	958	938	840	914	899.89	955.04	819.38	967.6
WBGene00001804	61.2786	0.0781089	0.358775	0.21771	0.827655	0.979316	63	59	65	59	59.18	60.07	63.4	62.46
WBGene00001805	44.5393	0.118683	0.436465	0.271919	0.785685	0.97312	53	35	56	36	49.78	35.64	54.63	38.11
WBGene00001806	1.49521	-0.035634	2.49151	-0.0143022	0.988589	0.99961	0	3	3	0	0	3.05	2.93	0
WBGene00001808	74.8745	-0.0424452	0.333123	-0.127416	0.898611	0.990129	89	67	70	75	83.6	68.22	68.28	79.4
WBGene00001811	90.8765	-0.722462	0.316207	-2.28478	0.0223258	0.215606	123	109	84	52	115.54	110.98	81.94	55.05
WBGene00001812	635.732	-0.140504	0.142955	-0.982852	0.32568	0.914505	748	619	585	604	702.63	630.24	570.64	639.42
WBGene00001813	372.411	0.0984738	0.163799	0.601187	0.547716	0.972757	379	357	401	358	356.01	363.49	391.15	379
WBGene00001814	1345.32	-0.324937	0.113359	-2.86645	0.00415108	0.0632873	1558	1502	1270	1086	1463.49	1529.29	1238.82	1149.69
WBGene00001815	186.86	-0.255966	0.221583	-1.15517	0.248021	0.840388	199	216	169	166	186.93	219.92	164.85	175.74
WBGene00001816	103.28	-0.148292	0.28191	-0.526025	0.598871	0.972757	112	110	101	92	105.21	112	98.52	97.4
WBGene00001817	393.08	0.122597	0.162554	0.75419	0.450735	0.972757	381	388	420	387	357.89	395.05	409.69	409.7
WBGene00001818	0.509083	-2.43836	4.19654	-0.581042	0.561212	0.972757	0	2	0	0	0	2.04	0	0
WBGene00001819	1817.81	-0.0566409	0.107796	-0.525444	0.599274	0.972757	1960	1833	1916	1601	1841.1	1866.3	1868.96	1694.89
WBGene00001820	82.9765	-0.0916038	0.322209	-0.2843	0.776181	0.972757	101	75	92	67	94.87	76.36	89.74	70.93
WBGene00001821	372.101	0.0487555	0.173802	0.280524	0.779075	0.972757	424	327	366	378	398.28	332.94	357.01	400.17
WBGene00001823	102.483	-0.0582428	0.282714	-0.206013	0.836781	0.979679	111	103	106	92	104.27	104.87	103.4	97.4
WBGene00001824	642.324	0.000133846	0.136692	0.000979184	0.999219	0.99961	687	628	682	585	645.33	639.41	665.26	619.31
WBGene00001827	597.808	0.331188	0.140986	2.34909	0.0188191	0.190547	551	532	710	604	517.58	541.66	692.57	639.42
WBGene00001828	78.4366	-0.479286	0.320965	-1.49327	0.135367	0.648853	98	89	66	63	92.06	90.62	64.38	66.69
WBGene00001829	175.688	0.357277	0.239078	1.4944	0.135071	0.648808	143	171	223	167	134.33	174.11	217.52	176.79
WBGene00001830	158.476	0.588731	0.241999	2.43278	0.0149832	0.1618	118	140	198	177	110.84	142.54	193.14	187.38
WBGene00001831	76.7002	0.70958	0.328925	2.15727	0.0309848	0.271869	59	60	105	83	55.42	61.09	102.42	87.87
WBGene00001832	160.36	0.468297	0.233805	2.00294	0.045184	0.349815	138	137	182	184	129.63	139.49	177.53	194.79
WBGene00001833	196.151	0.451337	0.215785	2.09161	0.0364735	0.303414	188	152	240	207	176.6	154.76	234.11	219.14
WBGene00001834	616.024	0.156395	0.138514	1.12909	0.25886	0.85235	598	593	666	613	561.72	603.77	649.65	648.95
WBGene00001835	257.303	-0.0299371	0.1927	-0.155356	0.876541	0.983525	260	271	269	233	244.23	275.92	262.4	246.66
WBGene00001836	300.518	0.304383	0.178633	1.70396	0.0883891	0.520305	295	256	337	317	277.1	260.65	328.73	335.59
WBGene00001837	2731.05	0.0691643	0.121061	0.571316	0.567785	0.972757	2863	2594	2521	2961	2689.33	2641.12	2459.1	3134.65
WBGene00001838	115.572	-0.0285168	0.273072	-0.10443	0.916828	0.997724	112	126	113	112	105.21	128.29	110.23	118.57
WBGene00001839	0.763625	-3.02351	3.56721	-0.847584	0.39667	0.955916	0	3	0	0	0	3.05	0	0
WBGene00001840	1922.87	0.0273088	0.103941	0.262733	0.792756	0.973176	1968	1926	2000	1824	1848.62	1960.99	1950.9	1930.97
WBGene00001841	5.70026	1.58678	1.30226	1.21848	0.223042	0.806812	6	0	10	7	5.64	0	9.75	7.41
WBGene00001842	3.40537	-2.51456	1.67677	-1.49964	0.133707	0.644942	8	4	1	1	7.51	4.07	0.98	1.06
WBGene00001843	1910.86	-0.0668328	0.102554	-0.651681	0.514607	0.972757	2101	1902	1902	1774	1973.55	1936.55	1855.3	1878.04
WBGene00001844	651.746	0.000181732	0.136479	0.00133157	0.998938	0.99961	684	649	643	639	642.51	660.79	627.21	676.47
WBGene00001851	9267.09	-0.312923	0.0870948	-3.5929	0.000327019	0.00803419	10734	10267	8345	7927	10082.9	10453.5	8140.11	8391.89
WBGene00001852	1301.21	-0.563659	0.122205	-4.61239	3.98056e-06	0.000186157	1518	1649	1086	983	1425.92	1678.96	1059.34	1040.65
WBGene00001853	703.652	0.205962	0.135197	1.52342	0.127654	0.632297	671	665	805	682	630.3	677.08	785.24	722
WBGene00001854	1327.01	-0.287079	0.123804	-2.31881	0.0204053	0.201927	1487	1494	1327	1035	1396.8	1521.14	1294.42	1095.7
WBGene00001855	183.248	1.1159	0.230074	4.85018	1.23349e-06	6.60704e-05	124	113	284	212	116.48	115.05	277.03	224.43
WBGene00001856	251.866	1.01517	0.194049	5.23151	1.68134e-07	1.09859e-05	173	168	349	315	162.51	171.05	340.43	333.47
WBGene00001857	10.9679	-0.0720788	0.827191	-0.0871369	0.930563	0.99961	12	11	10	11	11.27	11.2	9.75	11.65
WBGene00001858	234.953	0.313238	0.199279	1.57186	0.115984	0.599473	223	206	283	231	209.47	209.74	276.05	244.55
WBGene00001859	4.22425	-0.150369	1.35575	-0.110912	0.911686	0.995189	3	6	6	2	2.82	6.11	5.85	2.12
WBGene00001860	877.525	0.0419336	0.123966	0.338266	0.735162	0.972757	909	860	891	861	853.86	875.62	869.12	911.49
WBGene00001862	28.5045	0.0889889	0.541975	0.164194	0.869578	0.983018	21	35	33	25	19.73	35.64	32.19	26.47
WBGene00001863	6955.89	-0.151269	0.104486	-1.44774	0.147689	0.678632	7520	7441	6194	6746	7063.83	7576.18	6041.92	7141.63
WBGene00001864	170.629	0.0110547	0.238863	0.0462804	0.963087	0.99961	154	192	173	164	144.66	195.49	168.75	173.62
WBGene00001865	94.8293	0.455623	0.294925	1.54488	0.122376	0.618797	90	74	111	105	84.54	75.34	108.27	111.16
WBGene00001867	67.0662	0.257484	0.344501	0.74741	0.454816	0.972757	64	61	77	67	60.12	62.11	75.11	70.93
WBGene00001869	128.425	0.57745	0.265319	2.17644	0.0295225	0.26292	95	115	161	142	89.24	117.09	157.05	150.33
WBGene00001872	39.4016	0.876564	0.454759	1.92754	0.053913	0.388548	31	26	59	42	29.12	26.47	57.55	44.46
WBGene00001874	592.024	0.056145	0.151168	0.371408	0.710334	0.972757	563	621	584	602	528.85	632.28	569.66	637.3
WBGene00001875	6.20253	-0.0503542	1.09578	-0.0459528	0.963348	0.99961	8	5	6	6	7.51	5.09	5.85	6.35
WBGene00001876	1.92656	-0.648809	2.11105	-0.307339	0.758585	0.972757	5	0	2	1	4.7	0	1.95	1.06
WBGene00001877	13.7842	0.201773	0.751794	0.268389	0.7884	0.973176	10	16	15	14	9.39	16.29	14.63	14.82
WBGene00001878	19.028	-0.227409	0.674111	-0.337347	0.735855	0.972757	23	19	10	24	21.6	19.35	9.75	25.41
WBGene00001879	0.988872	-1.49127	2.8638	-0.520731	0.602554	0.972757	2	1	0	1	1.88	1.02	0	1.06
WBGene00001880	2.72739	0.843543	1.6613	0.50776	0.611622	0.972757	2	2	5	2	1.88	2.04	4.88	2.12
WBGene00001881	0.9979	0.0553475	2.62257	0.0211043	0.983162	0.99961	1	1	1	1	0.94	1.02	0.98	1.06
WBGene00001882	1.45745	-2.26913	2.4955	-0.90929	0.363197	0.939925	3	2	1	0	2.82	2.04	0.98	0
WBGene00001883	0	NA	NA	NA	NA	NA	0	0	0	0	0	0	0	0
WBGene00001884	0	NA	NA	NA	NA	NA	0	0	0	0	0	0	0	0
WBGene00001885	0	NA	NA	NA	NA	NA	0	0	0	0	0	0	0	0
WBGene00001886	0	NA	NA	NA	NA	NA	0	0	0	0	0	0	0	0
WBGene00001887	0	NA	NA	NA	NA	NA	0	0	0	0	0	0	0	0
WBGene00001888	0	NA	NA	NA	NA	NA	0	0	0	0	0	0	0	0
WBGene00001889	0	NA	NA	NA	NA	NA	0	0	0	0	0	0	0	0
WBGene00001890	1.50808	-0.906942	2.31118	-0.392415	0.694751	0.972757	2	2	0	2	1.88	2.04	0	2.12
WBGene00001891	0.713531	-0.912713	3.45212	-0.264392	0.791478	0.973176	2	0	1	0	1.88	0	0.98	0
WBGene00001892	1.52557	4.08381	2.53789	1.60914	0.107586	0.575606	0	0	3	3	0	0	2.93	3.18
WBGene00001893	0	NA	NA	NA	NA	NA	0	0	0	0	0	0	0	0
WBGene00001894	0	NA	NA	NA	NA	NA	0	0	0	0	0	0	0	0
WBGene00001895	0	NA	NA	NA	NA	NA	0	0	0	0	0	0	0	0
WBGene00001896	0.264662	1.54046	4.99037	0.308686	0.75756	0.972757	0	0	0	1	0	0	0	1.06
WBGene00001898	1598.68	-0.154176	0.108351	-1.42292	0.154759	0.694596	1740	1703	1582	1401	1634.45	1733.94	1543.16	1483.16
WBGene00001899	0	NA	NA	NA	NA	NA	0	0	0	0	0	0	0	0
WBGene00001900	0	NA	NA	NA	NA	NA	0	0	0	0	0	0	0	0
WBGene00001901	0	NA	NA	NA	NA	NA	0	0	0	0	0	0	0	0
WBGene00001902	0	NA	NA	NA	NA	NA	0	0	0	0	0	0	0	0
WBGene00001903	0	NA	NA	NA	NA	NA	0	0	0	0	0	0	0	0
WBGene00001904	0	NA	NA	NA	NA	NA	0	0	0	0	0	0	0	0
WBGene00001905	3.93879	-0.367578	1.5352	-0.239434	0.810769	0.977643	3	6	7	0	2.82	6.11	6.83	0
WBGene00001906	3.0561	0.100065	1.70979	0.0585246	0.953331	0.99961	3	3	0	6	2.82	3.05	0	6.35
WBGene00001907	0	NA	NA	NA	NA	NA	0	0	0	0	0	0	0	0
WBGene00001908	0	NA	NA	NA	NA	NA	0	0	0	0	0	0	0	0
WBGene00001909	1915.9	0.075983	0.121288	0.626469	0.531008	0.972757	1898	1913	1818	2040	1782.86	1947.75	1773.36	2159.64
WBGene00001910	58.7466	0.155866	0.38599	0.403808	0.686354	0.972757	61	53	78	45	57.3	53.96	76.08	47.64
WBGene00001911	1094.42	-0.0196492	0.120181	-0.163496	0.870128	0.983018	1222	1037	1151	993	1147.87	1055.84	1122.74	1051.24
WBGene00001912	6.46993	-0.358403	1.11448	-0.321589	0.747764	0.972757	10	5	3	8	9.39	5.09	2.93	8.47
WBGene00001913	0	NA	NA	NA	NA	NA	0	0	0	0	0	0	0	0
WBGene00001914	3.93195	-0.685996	1.38511	-0.495265	0.620413	0.972757	6	4	4	2	5.64	4.07	3.9	2.12
WBGene00001915	1635.36	0.0898906	0.108011	0.832232	0.405278	0.957104	1744	1503	1704	1616	1638.21	1530.3	1662.16	1710.77
WBGene00001916	4.48425	-0.20661	1.39915	-0.147668	0.882605	0.983744	8	2	1	7	7.51	2.04	0.98	7.41
WBGene00001917	0	NA	NA	NA	NA	NA	0	0	0	0	0	0	0	0
WBGene00001918	0	NA	NA	NA	NA	NA	0	0	0	0	0	0	0	0
WBGene00001919	0	NA	NA	NA	NA	NA	0	0	0	0	0	0	0	0
WBGene00001920	0	NA	NA	NA	NA	NA	0	0	0	0	0	0	0	0
WBGene00001921	0	NA	NA	NA	NA	NA	0	0	0	0	0	0	0	0
WBGene00001922	3.35005	-0.154889	1.71067	-0.0905429	0.927856	0.99961	1	6	0	6	0.94	6.11	0	6.35
WBGene00001923	0	NA	NA	NA	NA	NA	0	0	0	0	0	0	0	0
WBGene00001924	0	NA	NA	NA	NA	NA	0	0	0	0	0	0	0	0
WBGene00001925	0	NA	NA	NA	NA	NA	0	0	0	0	0	0	0	0
WBGene00001926	0	NA	NA	NA	NA	NA	0	0	0	0	0	0	0	0
WBGene00001927	0	NA	NA	NA	NA	NA	0	0	0	0	0	0	0	0
WBGene00001928	0	NA	NA	NA	NA	NA	0	0	0	0	0	0	0	0
WBGene00001929	0	NA	NA	NA	NA	NA	0	0	0	0	0	0	0	0
WBGene00001930	0	NA	NA	NA	NA	NA	0	0	0	0	0	0	0	0
WBGene00001931	0.763065	1.02936	3.16242	0.325498	0.744804	0.972757	0	1	1	1	0	1.02	0.98	1.06
WBGene00001932	0	NA	NA	NA	NA	NA	0	0	0	0	0	0	0	0
WBGene00001933	7.74671	0.517004	0.98544	0.524643	0.599832	0.972757	6	7	10	8	5.64	7.13	9.75	8.47
WBGene00001934	32.9518	0.166218	0.495807	0.335248	0.737438	0.972757	39	25	40	29	36.63	25.45	39.02	30.7
WBGene00001935	14.3732	0.945565	0.744001	1.27092	0.203757	0.783095	9	11	16	21	8.45	11.2	15.61	22.23
WBGene00001936	33.8503	0.149273	0.483753	0.308572	0.757647	0.972757	39	27	34	36	36.63	27.49	33.17	38.11
WBGene00001937	0	NA	NA	NA	NA	NA	0	0	0	0	0	0	0	0
WBGene00001938	3.26795	-0.185378	1.51395	-0.122447	0.902545	0.991449	2	5	3	3	1.88	5.09	2.93	3.18
WBGene00001939	0	NA	NA	NA	NA	NA	0	0	0	0	0	0	0	0
WBGene00001940	0	NA	NA	NA	NA	NA	0	0	0	0	0	0	0	0
WBGene00001941	5.68929	2.73897	1.38496	1.97765	0.0479679	0.363851	1	2	4	15	0.94	2.04	3.9	15.88
WBGene00001942	15.4419	1.20931	0.734792	1.64578	0.0998092	0.557446	9	10	16	26	8.45	10.18	15.61	27.52
WBGene00001943	0.975448	3.44599	3.24785	1.06101	0.288686	0.877526	0	0	4	0	0	0	3.9	0
WBGene00001944	0.487724	2.4463	4.26839	0.57312	0.566563	0.972757	0	0	2	0	0	0	1.95	0
WBGene00001945	1809.89	-0.0121669	0.105586	-0.115233	0.908261	0.993873	1973	1750	1899	1655	1853.32	1781.79	1852.38	1752.06
WBGene00001946	1670.84	0.0943244	0.106952	0.881935	0.377812	0.946507	1666	1638	1762	1636	1564.94	1667.76	1718.74	1731.95
WBGene00001947	2.53306	1.2345	1.84392	0.669499	0.503177	0.972757	0	3	4	3	0	3.05	3.9	3.18
WBGene00001948	226.244	0.0964284	0.200714	0.480427	0.630924	0.972757	225	222	233	227	211.35	226.03	227.28	240.31
WBGene00001949	376.2	0.122935	0.165776	0.741572	0.458347	0.972757	383	354	380	391	359.77	360.43	370.67	413.93
WBGene00001950	26.4843	-0.170659	0.547522	-0.311693	0.755274	0.972757	24	33	25	24	22.54	33.6	24.39	25.41
WBGene00001951	35.9821	0.362335	0.508821	0.712107	0.476398	0.972757	43	22	30	49	40.39	22.4	29.26	51.87
WBGene00001952	53.6501	0.232168	0.383013	0.606164	0.544406	0.972757	53	48	57	57	49.78	48.87	55.6	60.34
WBGene00001953	34.0878	0.311599	0.483048	0.645068	0.518883	0.972757	29	33	34	40	27.24	33.6	33.17	42.35
WBGene00001954	16.4651	-0.087366	0.725962	-0.120345	0.90421	0.99236	21	14	24	8	19.73	14.25	23.41	8.47
WBGene00001955	5944.95	-1.4572	0.0918818	-15.8596	1.20753e-56	3.44435e-53	8986	8830	3209	3040	8440.9	8990.41	3130.21	3218.28
WBGene00001956	3.7472	-0.970567	1.44566	-0.671368	0.501986	0.972757	3	7	3	2	2.82	7.13	2.93	2.12
WBGene00001957	39.9914	-1.23075	0.454493	-2.70797	0.00676967	0.0913831	63	52	23	24	59.18	52.94	22.44	25.41
WBGene00001958	6.03528	0.776689	1.13249	0.685825	0.492823	0.972757	3	6	8	7	2.82	6.11	7.8	7.41
WBGene00001959	4.28609	0.573316	1.3231	0.433313	0.664787	0.972757	3	4	4	6	2.82	4.07	3.9	6.35
WBGene00001960	10.4549	0.319343	0.853078	0.374343	0.708149	0.972757	9	10	14	9	8.45	10.18	13.66	9.53
WBGene00001961	8.78893	0.853375	0.992303	0.859994	0.389792	0.953567	10	3	7	15	9.39	3.05	6.83	15.88
WBGene00001962	5.21256	0.181108	1.19435	0.151637	0.879473	0.983716	5	5	7	4	4.7	5.09	6.83	4.23
WBGene00001963	6.63853	-0.0687837	1.09194	-0.0629921	0.949773	0.99961	8	6	10	3	7.51	6.11	9.75	3.18
WBGene00001964	0	NA	NA	NA	NA	NA	0	0	0	0	0	0	0	0
WBGene00001965	0.489376	-2.38816	3.91822	-0.6095	0.542193	0.972757	1	1	0	0	0.94	1.02	0	0
WBGene00001966	0	NA	NA	NA	NA	NA	0	0	0	0	0	0	0	0
WBGene00001967	0	NA	NA	NA	NA	NA	0	0	0	0	0	0	0	0
WBGene00001968	0.948366	-1.4954	3.10641	-0.481391	0.630239	0.972757	3	0	1	0	2.82	0	0.98	0
WBGene00001971	1037.16	0.0800123	0.120683	0.662994	0.507334	0.972757	1057	1006	1140	963	992.88	1024.28	1112.01	1019.48
WBGene00001972	710.333	0.139747	0.132635	1.05362	0.292056	0.881189	742	643	749	717	696.99	654.68	730.61	759.05
WBGene00001973	98.7683	0.660241	0.31915	2.06875	0.0385696	0.315012	69	87	149	91	64.81	88.58	145.34	96.34
WBGene00001974	686.256	-0.119697	0.138037	-0.867142	0.385864	0.951647	773	691	719	580	726.11	703.55	701.35	614.01
WBGene00001975	158.597	0.32579	0.242509	1.34342	0.179138	0.744376	161	128	200	149	151.23	130.33	195.09	157.74
WBGene00001976	547.439	0.417765	0.173573	2.40686	0.0160904	0.170759	500	459	530	695	469.67	467.34	516.99	735.76
WBGene00001977	199.5	0.573139	0.21358	2.68349	0.00728592	0.0968116	168	160	231	238	157.81	162.91	225.33	251.96
WBGene00001978	1206.27	0.22111	0.115529	1.91389	0.0556339	0.395795	1188	1092	1280	1274	1115.93	1111.84	1248.57	1348.72
WBGene00001979	1022.72	0.0563364	0.118248	0.476426	0.633771	0.972757	1075	978	1084	971	1009.79	995.77	1057.39	1027.95
WBGene00001980	2197.1	0.0081992	0.103386	0.0793066	0.936789	0.99961	2349	2136	2164	2169	2206.51	2174.8	2110.87	2296.2
WBGene00001981	6.12614	1.13145	1.20576	0.938373	0.348053	0.933555	6	2	14	3	5.64	2.04	13.66	3.18
WBGene00001983	361.147	0.117109	0.169509	0.690873	0.489646	0.972757	378	332	409	333	355.07	338.03	398.96	352.53
WBGene00001984	25.3147	0.970453	0.557787	1.73983	0.0818896	0.497822	18	17	34	32	16.91	17.31	33.17	33.88
WBGene00001985	22.3583	0.110002	0.590775	0.186199	0.852289	0.981026	22	22	28	18	20.67	22.4	27.31	19.06
WBGene00001986	168.015	0.0392022	0.234986	0.166828	0.867505	0.983018	176	163	154	180	165.32	165.96	150.22	190.56
WBGene00001987	167.009	0.447921	0.236098	1.89718	0.0578038	0.406679	150	139	175	203	140.9	141.53	170.7	214.91
WBGene00001988	166.261	0.175148	0.228783	0.765561	0.443938	0.972757	172	148	175	172	161.57	150.69	170.7	182.09
WBGene00001989	156.496	-0.452026	0.238735	-1.89342	0.0583021	0.408004	204	167	144	117	191.63	170.03	140.46	123.86
WBGene00001990	90.3904	0.167156	0.306958	0.544558	0.586058	0.972757	100	75	106	83	93.93	76.36	103.4	87.87
WBGene00001991	95.4507	-0.423699	0.302775	-1.39939	0.161698	0.707766	132	93	88	73	123.99	94.69	85.84	77.28
WBGene00001992	50.3014	0.273466	0.405545	0.674317	0.50011	0.972757	44	49	65	44	41.33	49.89	63.4	46.58
WBGene00001993	3097.76	0.180331	0.100047	1.80246	0.0714724	0.460956	3063	2879	3208	3262	2877.19	2931.3	3129.24	3453.3
WBGene00001994	2678.61	-0.422247	0.109181	-3.86739	0.000110005	0.00325876	3113	3155	2502	2019	2924.16	3212.31	2440.57	2137.41
WBGene00001995	111.676	-0.110262	0.274507	-0.401673	0.687925	0.972757	118	119	117	95	110.84	121.16	114.13	100.57
WBGene00001996	164.255	0.171187	0.229476	0.745989	0.455674	0.972757	160	156	183	160	150.29	158.83	178.51	169.38
WBGene00001997	68.7984	0.112289	0.347329	0.323293	0.746473	0.972757	80	56	75	66	75.15	57.02	73.16	69.87
WBGene00001998	43.9795	0.323736	0.433929	0.746058	0.455632	0.972757	41	39	60	37	38.51	39.71	58.53	39.17
WBGene00001999	2530.96	0.0753818	0.114936	0.655861	0.511914	0.972757	2472	2561	2449	2650	2322.05	2607.52	2388.87	2805.41
WBGene00002000	1331.59	0.0106068	0.112989	0.093874	0.925209	0.99961	1368	1344	1338	1292	1285.02	1368.42	1305.15	1367.77
WBGene00002001	858.908	-0.140113	0.127936	-1.09518	0.273438	0.86233	912	928	858	753	856.68	944.86	836.93	797.16
WBGene00002002	85.2174	0.383686	0.319413	1.20122	0.229664	0.815854	87	65	111	80	81.72	66.18	108.27	84.69
WBGene00002003	270.581	0.168476	0.187064	0.900635	0.367783	0.942657	277	245	306	259	260.2	249.45	298.49	274.19
WBGene00002004	916.809	0.212738	0.131037	1.6235	0.104482	0.569536	829	904	1017	922	778.71	920.42	992.03	976.07
WBGene00002005	23109.2	-0.806769	0.0958484	-8.41714	3.85785e-17	1.06097e-14	30389	29730	18393	14811	28545.6	30270.1	17941.4	15679.6
WBGene00002007	10331.2	0.744641	0.0871284	8.54648	1.26902e-17	3.71157e-15	8282	7529	13607	11908	7779.6	7665.77	13272.9	12606.4
WBGene00002008	4214.24	1.28617	0.1144	11.2428	2.51357e-29	2.0137e-26	2800	2231	6642	5173	2630.15	2271.53	6478.93	5476.38
WBGene00002010	7026.96	-0.544166	0.0925377	-5.88049	4.09066e-09	3.69483e-07	8582	8459	6052	5224	8061.4	8612.67	5903.41	5530.37
WBGene00002011	2277.26	0.237537	0.132878	1.78763	0.0738362	0.470601	2206	2070	2148	2677	2072.18	2107.6	2095.26	2834
WBGene00002012	350.003	0.105827	0.170166	0.621904	0.534005	0.972757	370	321	389	327	347.56	326.83	379.45	346.18
WBGene00002013	1133.56	-0.199066	0.130439	-1.52612	0.126979	0.630258	1244	1232	975	1096	1168.54	1254.38	951.06	1160.28
WBGene00002015	0	NA	NA	NA	NA	NA	0	0	0	0	0	0	0	0
WBGene00002016	1820.32	-2.08407	0.283586	-7.349	1.99694e-13	3.99953e-11	3295	2747	849	530	3095.12	2796.9	828.16	561.08
WBGene00002017	0	NA	NA	NA	NA	NA	0	0	0	0	0	0	0	0
WBGene00002018	1662.69	-2.2481	0.358308	-6.27421	3.51419e-10	3.90075e-08	3133	2506	735	415	2942.95	2551.52	716.95	439.34
WBGene00002019	0.234835	-1.3705	4.99454	-0.274399	0.783778	0.972757	1	0	0	0	0.94	0	0	0
WBGene00002020	0	NA	NA	NA	NA	NA	0	0	0	0	0	0	0	0
WBGene00002021	1036.01	0.0570626	0.117775	0.484505	0.628027	0.972757	1075	1003	1069	1011	1009.79	1021.22	1042.75	1070.29
WBGene00002023	2016.76	0.122973	0.105503	1.16559	0.243781	0.833996	2127	1830	2089	2048	1997.97	1863.24	2037.71	2168.11
WBGene00002024	1681.28	-0.117562	0.117096	-1.00399	0.315385	0.903208	1825	1754	1790	1397	1714.29	1785.86	1746.05	1478.93
WBGene00002025	822.775	-0.149136	0.127526	-1.16946	0.242219	0.833246	905	865	829	710	850.1	880.71	808.65	751.64
WBGene00002026	927.133	-2.59474	0.444011	-5.84386	5.10056e-09	4.47538e-07	1805	1460	352	173	1695.51	1486.52	343.36	183.15
WBGene00002027	1718.83	0.00763176	0.107243	0.0711633	0.943268	0.99961	1792	1714	1706	1684	1683.29	1745.14	1664.11	1782.76
WBGene00002028	314.924	0.0608021	0.180769	0.336352	0.736605	0.972757	300	329	327	306	281.8	334.98	318.97	323.95
WBGene00002029	95.5176	-0.0354855	0.291847	-0.12159	0.903224	0.991733	104	94	99	87	97.69	95.71	96.57	92.1
WBGene00002030	63.7981	0.498028	0.370796	1.34313	0.17923	0.744475	54	54	61	85	50.72	54.98	59.5	89.98
WBGene00002031	120.92	0.422224	0.283833	1.48758	0.136862	0.653253	88	122	134	138	82.66	124.22	130.71	146.09
WBGene00002032	21.8341	0.788355	0.615202	1.28146	0.200033	0.778748	20	13	35	20	18.79	13.24	34.14	21.17
WBGene00002033	18.9253	0.756846	0.64691	1.16994	0.242025	0.833094	18	11	26	21	16.91	11.2	25.36	22.23
WBGene00002034	54.5997	0.549104	0.38334	1.43242	0.152023	0.689876	51	40	69	59	47.91	40.73	67.31	62.46
WBGene00002035	1420.77	0.0938136	0.111832	0.838879	0.401537	0.957104	1475	1339	1442	1443	1385.52	1363.32	1406.6	1527.63
WBGene00002036	1558.81	0.017911	0.107661	0.166364	0.867871	0.983018	1614	1554	1589	1499	1516.09	1582.23	1549.99	1586.91
WBGene00002037	914.06	0.251778	0.124781	2.01777	0.0436156	0.340878	930	781	1026	932	873.58	795.19	1000.81	986.66
WBGene00002038	1757.42	-0.281706	0.105898	-2.66017	0.00781005	0.101495	2090	1860	1668	1460	1963.22	1893.79	1627.05	1545.62
WBGene00002039	833.222	0.195885	0.126311	1.55081	0.120947	0.614437	801	787	921	832	752.41	801.3	898.39	880.79
WBGene00002040	1193.79	-0.144095	0.127994	-1.12579	0.260253	0.852874	1283	1278	1055	1171	1205.17	1301.22	1029.1	1239.67
WBGene00002041	1061.24	-0.214565	0.117139	-1.83171	0.0669943	0.442545	1196	1136	1005	930	1123.45	1156.64	980.33	984.54
WBGene00002042	36.0607	-0.122473	0.462696	-0.264693	0.791246	0.973176	41	36	35	33	38.51	36.65	34.14	34.94
WBGene00002043	363.782	0.0917271	0.188889	0.485615	0.62724	0.972757	385	337	448	296	361.65	343.12	437	313.36
WBGene00002044	280.531	-0.34303	0.186611	-1.83821	0.0660316	0.438824	335	307	236	250	314.68	312.58	230.21	264.66
WBGene00002045	12670.6	-0.202064	0.0860266	-2.34885	0.0188313	0.190547	14577	13181	12360	10875	13692.7	13420.5	12056.5	11512.8
WBGene00002046	422.392	-0.0153002	0.160669	-0.0952279	0.924134	0.99961	477	394	448	381	448.06	401.16	437	403.34
WBGene00002047	113.235	0.589672	0.284562	2.07221	0.0382458	0.313626	80	104	142	126	75.15	105.89	138.51	133.39
WBGene00002048	14255.9	-0.0765283	0.0902909	-0.847575	0.396675	0.955916	15027	14882	13740	13558	14115.4	15152.4	13402.6	14353.1
WBGene00002050	3181.26	0.607842	0.112645	5.39607	6.81169e-08	4.84603e-06	2590	2562	3576	3963	2432.89	2608.54	3488.2	4195.41
WBGene00002051	29.2832	-0.538981	0.514335	-1.04792	0.294676	0.882928	37	34	24	23	34.76	34.62	23.41	24.35
WBGene00002052	1002.01	-0.029667	0.120419	-0.246365	0.805399	0.975372	1049	1021	1040	915	985.37	1039.55	1014.47	968.66
WBGene00002053	3613.16	0.577103	0.0963764	5.98801	2.12428e-09	2.02808e-07	3030	2901	4283	4227	2846.2	2953.7	4177.84	4474.9
WBGene00002054	27352.4	-0.354057	0.0950608	-3.72453	0.000195679	0.00522548	31173	31529	23268	23926	29282	32101.8	22696.7	25329.2
WBGene00002055	4470.07	-0.465634	0.0992437	-4.69182	2.70781e-06	0.000133764	5399	5204	3624	3755	5071.49	5298.54	3535.02	3975.22
WBGene00002056	5510.45	0.195369	0.0939972	2.07845	0.0376677	0.309712	5555	4967	5768	5800	5218.03	5057.23	5626.38	6140.15
WBGene00002057	744.529	0.170828	0.133369	1.28087	0.200239	0.779221	753	681	763	787	707.32	693.37	744.27	833.15
WBGene00002058	461.119	0.646647	0.152103	4.25137	2.12471e-05	0.000805555	386	350	583	526	362.58	356.36	568.69	556.85
WBGene00002059	539.566	-0.321896	0.143827	-2.23808	0.0252159	0.234424	639	588	481	463	600.24	598.68	469.19	490.15
WBGene00002060	471.155	-0.0633903	0.154321	-0.410769	0.681242	0.972757	489	495	493	416	459.34	503.99	480.9	440.4
WBGene00002061	381.754	0.276714	0.163261	1.69492	0.0900906	0.525985	374	333	416	407	351.31	339.05	405.79	430.87
WBGene00002062	140.781	0.146357	0.247305	0.591807	0.55398	0.972757	148	126	160	132	139.02	128.29	156.07	139.74
WBGene00002063	36.6338	0.336028	0.470755	0.713807	0.475347	0.972757	31	35	35	45	29.12	35.64	34.14	47.64
WBGene00002064	128.588	0.185942	0.268099	0.693558	0.487959	0.972757	122	124	161	110	114.6	126.25	157.05	116.45
WBGene00002065	14277.9	-0.244173	0.0907023	-2.69203	0.00710189	0.0953004	16071	15588	13997	11799	15096.1	15871.2	13653.4	12491
WBGene00002066	2560.69	0.0744189	0.109156	0.681766	0.495387	0.972757	2624	2479	2483	2675	2464.82	2524.03	2422.04	2831.88
WBGene00002067	1951.55	0.451612	0.104646	4.31563	1.59148e-05	0.000622603	1728	1644	2235	2200	1623.18	1673.87	2180.13	2329.02
WBGene00002068	94.8524	1.17368	0.326437	3.59542	0.000323867	0.00799942	56	63	164	97	52.6	64.14	159.97	102.69
WBGene00002069	679.303	-0.307443	0.13781	-2.23093	0.025686	0.237357	844	697	605	590	792.8	709.66	590.15	624.6
WBGene00002070	716.256	0.66895	0.132537	5.04726	4.4819e-07	2.64397e-05	601	532	924	810	564.54	541.66	901.31	857.5
WBGene00002071	381.393	0.213307	0.168895	1.26295	0.206607	0.783789	406	319	407	399	381.37	324.8	397.01	422.4
WBGene00002072	301.884	0.0199922	0.178144	0.112225	0.910645	0.994799	310	303	316	283	291.19	308.5	308.24	299.6
WBGene00002073	113.532	0.544694	0.301935	1.80401	0.0712301	0.46036	81	107	163	104	76.09	108.94	159	110.1
WBGene00002074	3054.76	-0.05104	0.115078	-0.443525	0.657386	0.972757	3254	3104	2754	3132	3056.61	3160.39	2686.38	3315.68
WBGene00002075	541.628	0.0903279	0.146261	0.617582	0.536851	0.972757	588	488	580	521	552.33	496.87	565.76	551.55
WBGene00002076	713.274	0.0294596	0.130908	0.22504	0.821948	0.9785	751	694	748	672	705.44	706.61	729.64	711.41
WBGene00002077	6768.34	-0.23544	0.0911937	-2.58175	0.00982994	0.118291	7548	7414	6226	6009	7090.13	7548.68	6073.14	6361.4
WBGene00002078	11875.5	-0.253581	0.0973714	-2.60427	0.00920701	0.113401	13007	13372	10553	10745	12218	13614.9	10293.9	11375.1
WBGene00002079	370.387	0.228983	0.167076	1.37053	0.170521	0.725807	360	338	433	356	338.16	344.14	422.37	376.88
WBGene00002080	503.96	0.0437028	0.148992	0.293324	0.769275	0.972757	533	483	500	506	500.67	491.77	487.72	535.67
WBGene00002081	672.516	0.0173842	0.133479	0.13024	0.896377	0.989284	723	646	697	636	679.14	657.74	679.89	673.3
WBGene00002083	1012.2	0.384768	0.127695	3.01317	0.00258534	0.0441097	1001	801	1222	1040	940.28	815.55	1192	1100.99
WBGene00002084	216.271	-0.254222	0.204258	-1.24461	0.213274	0.789142	256	226	208	181	240.47	230.11	202.89	191.61
WBGene00002085	4.45687	1.03244	1.33434	0.773746	0.439081	0.970823	3	3	9	3	2.82	3.05	8.78	3.18
WBGene00002086	38.8319	-0.202245	0.447382	-0.452064	0.651223	0.972757	44	41	35	36	41.33	41.74	34.14	38.11
WBGene00002087	10.799	-0.749176	0.858252	-0.87291	0.382712	0.949237	18	10	10	6	16.91	10.18	9.75	6.35
WBGene00002088	5.57414	-0.843917	1.23676	-0.682359	0.495012	0.972757	12	3	6	2	11.27	3.05	5.85	2.12
WBGene00002089	5.53281	-1.00712	1.32571	-0.75969	0.44744	0.972757	7	8	0	7	6.58	8.15	0	7.41
WBGene00002090	4.32606	-0.137954	1.4016	-0.0984264	0.921594	0.99961	1	8	3	5	0.94	8.15	2.93	5.29
WBGene00002091	0	NA	NA	NA	NA	NA	0	0	0	0	0	0	0	0
WBGene00002092	0.509083	-2.43836	4.19654	-0.581042	0.561212	0.972757	0	2	0	0	0	2.04	0	0
WBGene00002093	42.5184	-0.337939	0.42896	-0.787811	0.430807	0.967683	48	49	39	35	45.09	49.89	38.04	37.05
WBGene00002094	81.8541	1.42567	0.375708	3.79463	0.000147862	0.0041532	51	40	82	150	47.91	40.73	79.99	158.8
WBGene00002095	4.00172	0.428611	1.35731	0.31578	0.75217	0.972757	4	3	4	5	3.76	3.05	3.9	5.29
WBGene00002096	1.02882	1.70256	3.02719	0.562421	0.573829	0.972757	1	0	0	3	0.94	0	0	3.18
WBGene00002097	31.1435	-0.0787911	0.512	-0.153889	0.877697	0.983525	41	25	35	25	38.51	25.45	34.14	26.47
WBGene00002098	0.9979	0.0553475	2.62257	0.0211043	0.983162	0.99961	1	1	1	1	0.94	1.02	0.98	1.06
WBGene00002099	2.16768	1.04779	2.16349	0.484305	0.62817	0.972757	3	0	6	0	2.82	0	5.85	0
WBGene00002100	857.702	0.0355748	0.136243	0.261114	0.794005	0.973409	910	824	804	900	854.8	838.97	784.26	952.78
WBGene00002101	242.266	0.143643	0.195566	0.734498	0.462645	0.972757	257	215	260	241	241.41	218.91	253.62	255.13
WBGene00002102	0	NA	NA	NA	NA	NA	0	0	0	0	0	0	0	0
WBGene00002103	7.66788	0.54211	1.02364	0.529593	0.596394	0.972757	10	3	10	8	9.39	3.05	9.75	8.47
WBGene00002104	2.48627	-0.495176	1.74176	-0.284296	0.776184	0.972757	4	2	1	3	3.76	2.04	0.98	3.18
WBGene00002105	3.43354	-0.785654	1.48372	-0.529517	0.596447	0.972757	6	3	3	2	5.64	3.05	2.93	2.12
WBGene00002106	0.254542	-1.42918	4.99047	-0.286382	0.774585	0.972757	0	1	0	0	0	1.02	0	0
WBGene00002107	29.7792	-1.22156	0.529835	-2.30556	0.0211354	0.2066	41	44	15	20	38.51	44.8	14.63	21.17
WBGene00002108	1.23273	-0.515401	2.39373	-0.215312	0.829524	0.979316	2	1	1	1	1.88	1.02	0.98	1.06
WBGene00002109	19.3403	-0.552694	0.633163	-0.87291	0.382712	0.949237	23	24	18	13	21.6	24.44	17.56	13.76
WBGene00002110	263.093	-0.82588	0.238067	-3.46911	0.000522179	0.0118202	447	248	179	194	419.88	252.51	174.61	205.38
WBGene00002111	27.5493	-0.119443	0.559113	-0.21363	0.830836	0.979316	20	38	28	24	18.79	38.69	27.31	25.41
WBGene00002112	7.46674	-0.314583	1.0108	-0.311221	0.755633	0.972757	10	7	5	8	9.39	7.13	4.88	8.47
WBGene00002113	156.967	-1.20979	0.25202	-4.80037	1.58372e-06	8.22016e-05	265	186	101	86	248.92	189.38	98.52	91.04
WBGene00002114	0.773745	-0.961715	3.35635	-0.286536	0.774468	0.972757	0	2	0	1	0	2.04	0	1.06
WBGene00002115	0	NA	NA	NA	NA	NA	0	0	0	0	0	0	0	0
WBGene00002116	1.76096	0.457471	2.0216	0.226292	0.820975	0.978202	1	2	2	2	0.94	2.04	1.95	2.12
WBGene00002117	17.9767	-0.173385	0.661977	-0.26192	0.793383	0.973177	21	18	13	20	19.73	18.33	12.68	21.17
WBGene00002118	161.168	-0.834204	0.234427	-3.55847	0.000373016	0.00896114	211	211	117	111	198.2	214.83	114.13	117.51
WBGene00002119	1.48728	-0.944994	2.21188	-0.427236	0.669207	0.972757	2	2	1	1	1.88	2.04	0.98	1.06
WBGene00002120	2.23063	-0.258159	1.79376	-0.143921	0.885563	0.984931	3	2	2	2	2.82	2.04	1.95	2.12
WBGene00002121	1.21359	-3.70009	2.74731	-1.34681	0.178043	0.742724	3	2	0	0	2.82	2.04	0	0
WBGene00002123	724.059	-0.0101178	0.133713	-0.0756682	0.939683	0.99961	746	739	711	708	700.75	752.42	693.54	749.52
WBGene00002124	138.16	0.162601	0.254599	0.638655	0.523048	0.972757	125	141	159	129	117.42	143.56	155.1	136.57
WBGene00002125	547.691	0.31823	0.150135	2.11962	0.0340378	0.28943	496	500	580	614	465.91	509.08	565.76	650.01
WBGene00002127	723.682	0.0953531	0.132078	0.721947	0.470327	0.972757	768	666	784	690	721.41	678.1	764.75	730.47
WBGene00002128	875.074	-0.4447	0.127163	-3.4971	0.000470349	0.0108469	1022	1039	747	712	960	1057.87	728.66	753.76
WBGene00002129	298.718	-0.0709312	0.187704	-0.377887	0.705514	0.972757	345	283	326	250	324.07	288.14	318	264.66
WBGene00002130	5.16633	-1.25784	1.23388	-1.01942	0.308005	0.894111	9	6	3	3	8.45	6.11	2.93	3.18
WBGene00002131	5.66196	0.448556	1.18941	0.377124	0.706081	0.972757	8	2	8	5	7.51	2.04	7.8	5.29
WBGene00002132	425.611	-0.0687319	0.159858	-0.429956	0.667228	0.972757	449	442	450	370	421.76	450.03	438.95	391.7
WBGene00002133	237.156	-0.264176	0.201759	-1.30937	0.190411	0.763365	252	276	216	208	236.71	281.01	210.7	220.2
WBGene00002134	1333.62	-0.0231478	0.113395	-0.204133	0.838249	0.980079	1421	1330	1413	1197	1334.8	1354.16	1378.31	1267.2
WBGene00002135	1294.99	0.166592	0.111584	1.49298	0.135443	0.648853	1317	1182	1417	1282	1237.11	1203.47	1382.21	1357.18
WBGene00002136	80.9743	0.368733	0.317271	1.1622	0.245153	0.835749	80	65	96	84	75.15	66.18	93.64	88.93
WBGene00002137	869.187	-0.41426	0.128913	-3.21349	0.00131134	0.0253051	1030	1001	808	663	967.52	1019.18	788.16	701.88
WBGene00002138	826.059	-0.286472	0.143651	-1.99423	0.046127	0.354625	972	887	857	616	913.04	903.11	835.96	652.13
WBGene00002139	380.011	-0.0551607	0.17179	-0.321094	0.74814	0.972757	413	380	421	316	387.95	386.9	410.66	334.53
WBGene00002140	260.001	0.262315	0.210367	1.24694	0.21242	0.788455	209	272	301	258	196.32	276.94	293.61	273.13
WBGene00002141	101.356	0.549681	0.320172	1.71683	0.0860096	0.5109	112	58	117	120	105.21	59.05	114.13	127.04
WBGene00002142	151.192	-0.206049	0.240078	-0.858261	0.390749	0.953567	164	167	151	126	154.05	170.03	147.29	133.39
WBGene00002143	22.7919	0.195499	0.605987	0.322613	0.746988	0.972757	15	28	27	21	14.09	28.51	26.34	22.23
WBGene00002144	35.5652	0.489181	0.478802	1.02168	0.306934	0.893882	38	23	44	38	35.69	23.42	42.92	40.23
WBGene00002146	667.68	0.0864836	0.13992	0.618094	0.536513	0.972757	738	591	693	661	693.23	601.74	675.99	699.77
WBGene00002147	858.923	0.0228301	0.138542	0.164788	0.869111	0.983018	886	857	980	732	832.25	872.57	955.94	774.93
WBGene00002148	923.665	0.0742472	0.121662	0.610273	0.541681	0.972757	945	896	983	884	887.68	912.28	958.87	935.84
WBGene00002149	116.382	-0.129145	0.279623	-0.461855	0.644185	0.972757	144	106	127	93	135.26	107.93	123.88	98.45
WBGene00002150	86.1055	-0.107442	0.312763	-0.343524	0.731204	0.972757	84	98	82	81	78.9	99.78	79.99	85.75
WBGene00002151	189.966	-0.361895	0.217006	-1.66768	0.09538	0.543904	236	202	177	151	221.68	205.67	172.65	159.86
WBGene00002152	2541.25	0.0202017	0.0994816	0.203069	0.839081	0.980079	2645	2517	2695	2351	2484.55	2562.72	2628.83	2488.88
WBGene00002153	444.756	-0.699301	0.156253	-4.47544	7.6253e-06	0.0003324	562	563	352	316	527.91	573.23	343.36	334.53
WBGene00002162	6795.92	-0.352522	0.0873787	-4.03442	5.47372e-05	0.00178827	8161	7443	6119	5640	7665.94	7578.21	5968.77	5970.76
WBGene00002163	1359.59	-0.205823	0.127691	-1.61189	0.106987	0.574793	1465	1509	1172	1306	1376.13	1536.41	1143.23	1382.59
WBGene00002169	545.325	0.171392	0.145791	1.1756	0.239754	0.830099	559	492	620	520	525.09	500.94	604.78	550.5
WBGene00002173	5283.89	-0.163162	0.0965756	-1.68947	0.0911289	0.530179	5743	5667	4878	4924	5394.62	5769.95	4758.24	5212.77
WBGene00002174	2202.1	-0.191717	0.104125	-1.84121	0.0655903	0.437242	2449	2353	2018	2025	2300.44	2395.75	1968.45	2143.76
WBGene00002175	1189.53	-0.00331708	0.115743	-0.0286591	0.977137	0.99961	1265	1172	1172	1165	1188.26	1193.29	1143.23	1233.32
WBGene00002176	735.149	-0.185796	0.131884	-1.40878	0.158899	0.701812	844	758	677	676	792.8	771.77	660.38	715.64
WBGene00002177	184.043	-0.198323	0.219891	-0.901915	0.367102	0.941862	203	199	167	170	190.69	202.62	162.9	179.97
WBGene00002178	533.369	-0.148044	0.14812	-0.999486	0.317559	0.904241	561	584	511	485	526.97	594.61	498.45	513.44
WBGene00002179	3434.92	-0.0222898	0.111061	-0.200699	0.840934	0.980079	3485	3584	3215	3477	3273.6	3649.11	3136.07	3680.91
WBGene00002180	157.866	0.0565916	0.240195	0.235607	0.813737	0.977815	183	135	162	155	171.9	137.45	158.02	164.09
WBGene00002181	422.823	-0.0858921	0.157284	-0.546097	0.585	0.972757	447	443	421	387	419.88	451.05	410.66	409.7
WBGene00002182	103.135	-0.10597	0.289663	-0.365839	0.714485	0.972757	103	115	93	102	96.75	117.09	90.72	107.98
WBGene00002183	459.012	-0.141501	0.156864	-0.902057	0.367027	0.941862	546	442	461	400	512.88	450.03	449.68	423.46
WBGene00002184	266.454	0.0161335	0.194728	0.0828512	0.93397	0.99961	261	280	294	235	245.17	285.09	286.78	248.78
WBGene00002185	367.994	0.0210203	0.166606	0.126168	0.899599	0.99044	408	341	376	354	383.25	347.19	366.77	374.76
WBGene00002186	6.46887	-1.38804	1.11914	-1.24027	0.214874	0.791697	8	11	3	4	7.51	11.2	2.93	4.23
WBGene00002187	1495.93	0.00863418	0.109264	0.0790212	0.937016	0.99961	1596	1457	1491	1461	1499.18	1483.47	1454.39	1546.68
WBGene00002188	237.789	0.125209	0.202083	0.619592	0.535526	0.972757	220	244	247	241	206.65	248.43	240.94	255.13
WBGene00002189	4587.05	-0.24939	0.0915873	-2.72298	0.00646965	0.0883035	5186	5003	4307	3950	4871.41	5093.89	4201.25	4181.65
WBGene00002190	2790.92	0.108759	0.1056	1.02991	0.303053	0.890172	2865	2632	2764	2925	2691.21	2679.81	2696.14	3096.54
WBGene00002191	5469.45	-0.303677	0.095308	-3.18627	0.00144119	0.0273802	6149	6198	5156	4498	5775.99	6310.59	5029.41	4761.79
WBGene00002192	2339.36	-0.169624	0.100858	-1.68181	0.0926049	0.534922	2569	2495	2214	2120	2413.16	2540.32	2159.64	2244.33
WBGene00002193	0.234835	-1.3705	4.99454	-0.274399	0.783778	0.972757	1	0	0	0	0.94	0	0	0
WBGene00002194	2.9937	0.0553509	1.5532	0.0356366	0.971572	0.99961	3	3	3	3	2.82	3.05	2.93	3.18
WBGene00002195	456.852	0.2847	0.153324	1.85685	0.0633318	0.428276	439	404	495	492	412.37	411.34	482.85	520.85
WBGene00002196	2849.72	-0.181926	0.103811	-1.75248	0.079692	0.490941	3180	3016	2569	2678	2987.1	3070.79	2505.93	2835.05
WBGene00002198	71.1589	-0.435384	0.338105	-1.28772	0.197845	0.775746	81	86	60	59	76.09	87.56	58.53	62.46
WBGene00002199	10.7894	-0.600941	0.866104	-0.693844	0.48778	0.972757	19	8	10	7	17.85	8.15	9.75	7.41
WBGene00002200	114.828	-0.421579	0.275554	-1.52993	0.126033	0.628324	151	119	109	85	141.84	121.16	106.32	89.98
WBGene00002201	1939.44	0.0915973	0.106195	0.862541	0.38839	0.95245	1955	1885	1967	1968	1836.41	1919.24	1918.71	2083.42
WBGene00002202	4354.1	0.00780558	0.0990139	0.0788332	0.937165	0.99961	4529	4351	4220	4360	4254.26	4430.04	4116.39	4615.7
WBGene00002203	1185.79	-0.000845928	0.113818	-0.00743229	0.99407	0.99961	1252	1175	1229	1107	1176.05	1196.35	1198.83	1171.92
WBGene00002204	0	NA	NA	NA	NA	NA	0	0	0	0	0	0	0	0
WBGene00002205	53.4741	0.0870348	0.401898	0.21656	0.828551	0.979316	67	40	62	47	62.94	40.73	60.48	49.76
WBGene00002206	1.29239	2.05975	2.6272	0.784012	0.433033	0.969274	0	1	1	3	0	1.02	0.98	3.18
WBGene00002207	1126.99	-0.0717475	0.117176	-0.612303	0.540337	0.972757	1205	1157	1091	1071	1131.9	1178.02	1064.21	1133.81
WBGene00002208	1.05865	3.54994	3.15882	1.12382	0.261089	0.852874	0	0	0	4	0	0	0	4.23
WBGene00002210	1551.54	-0.222281	0.107337	-2.07087	0.0383712	0.314259	1794	1627	1492	1331	1685.17	1656.56	1455.37	1409.06
WBGene00002211	36.0379	0.386001	0.475143	0.812389	0.416569	0.96313	33	31	50	31	31	31.56	48.77	32.82
WBGene00002212	15.1527	-0.0884163	0.705938	-0.125246	0.900328	0.99065	17	15	16	13	15.97	15.27	15.61	13.76
WBGene00002213	551.155	0.00334003	0.142499	0.0234391	0.9813	0.99961	575	551	568	519	540.12	561.01	554.05	549.44
WBGene00002214	147.418	0.528551	0.244982	2.15751	0.0309657	0.271869	126	121	193	151	118.36	123.2	188.26	159.86
WBGene00002215	1563.98	0.189821	0.110064	1.72464	0.0845915	0.507549	1521	1467	1643	1635	1428.73	1493.65	1602.66	1730.89
WBGene00002216	601.462	-0.293827	0.140503	-2.09126	0.0365049	0.303425	677	677	563	502	635.93	689.3	549.18	531.44
WBGene00002217	3113.75	-0.147993	0.0998216	-1.48257	0.138188	0.655911	3347	3342	2939	2873	3143.97	3402.71	2866.84	3041.49
WBGene00002218	45.1191	-0.560788	0.435497	-1.2877	0.197851	0.775746	70	41	39	33	65.75	41.74	38.04	34.94
WBGene00002219	553.792	-0.0907753	0.146645	-0.619013	0.535908	0.972757	637	534	526	529	598.36	543.7	513.09	560.02
WBGene00002220	225.829	0.0317194	0.21143	0.150023	0.880746	0.983744	208	247	227	222	195.38	251.49	221.43	235.02
WBGene00002222	1577.17	-0.240597	0.108549	-2.21648	0.026659	0.244144	1867	1633	1450	1396	1753.75	1662.67	1414.4	1477.87
WBGene00002223	2084.89	0.0441968	0.109105	0.405084	0.685416	0.972757	2040	2151	2154	2014	1916.25	2190.08	2101.11	2132.11
WBGene00002224	239.465	-0.0875995	0.198025	-0.442367	0.658224	0.972757	278	228	231	226	261.14	232.14	225.33	239.25
WBGene00002225	100.722	0.126668	0.295119	0.429208	0.667772	0.972757	103	94	92	114	96.75	95.71	89.74	120.69
WBGene00002226	236.49	-0.115292	0.196087	-0.587966	0.556555	0.972757	257	246	230	217	241.41	250.47	224.35	229.73
WBGene00002227	0.243862	1.48086	4.9945	0.296499	0.766849	0.972757	0	0	1	0	0	0	0.98	0
WBGene00002228	80.8458	0.139575	0.363538	0.383934	0.701027	0.972757	59	97	104	64	55.42	98.76	101.45	67.75
WBGene00002229	191.303	0.194206	0.217054	0.894735	0.370929	0.943722	185	180	222	181	173.78	183.27	216.55	191.61
WBGene00002230	268.383	0.0337079	0.193154	0.174513	0.861462	0.982229	287	256	252	281	269.59	260.65	245.81	297.48
WBGene00002231	151.999	0.585059	0.247014	2.36852	0.0178592	0.18343	115	133	199	161	108.02	135.42	194.11	170.44
WBGene00002232	1974.82	-0.756472	0.102872	-7.35352	1.93054e-13	3.90902e-11	2652	2427	1535	1360	2491.13	2471.09	1497.31	1439.76
WBGene00002233	265.21	0.0974395	0.191836	0.507933	0.611501	0.972757	251	272	283	257	235.77	276.94	276.05	272.07
WBGene00002234	282.409	-0.300374	0.184729	-1.62602	0.103945	0.568333	317	320	267	232	297.77	325.81	260.44	245.61
WBGene00002235	186.184	0.0629866	0.225324	0.279538	0.779832	0.972757	210	164	211	165	197.26	166.98	205.82	174.68
WBGene00002238	744.634	0.059494	0.134138	0.443527	0.657384	0.972757	806	689	818	682	757.11	701.52	797.92	722
WBGene00002239	535.091	-0.361411	0.146019	-2.47509	0.0133201	0.148031	657	576	498	426	617.15	586.46	485.77	450.98
WBGene00002240	149.81	0.0502503	0.242131	0.207534	0.835593	0.979679	151	150	168	133	141.84	152.72	163.88	140.8
WBGene00002241	362.288	-0.257564	0.166744	-1.54467	0.122427	0.618887	425	383	351	300	399.22	389.96	342.38	317.59
WBGene00002242	222.756	-0.131138	0.207925	-0.6307	0.528237	0.972757	226	249	208	210	212.29	253.52	202.89	222.32
WBGene00002243	469.316	0.190136	0.152957	1.24306	0.213845	0.789396	446	450	525	461	418.95	458.17	512.11	488.04
WBGene00002244	754.955	-0.320347	0.128871	-2.48579	0.0129263	0.14479	893	823	679	643	838.83	837.95	662.33	680.71
WBGene00002245	434.301	0.0716406	0.158306	0.452546	0.650876	0.972757	424	441	463	414	398.28	449.01	451.63	438.28
WBGene00002246	26.6302	-0.0217086	0.536523	-0.0404616	0.967725	0.99961	30	25	26	26	28.18	25.45	25.36	27.52
WBGene00002247	2439.84	0.145615	0.09864	1.47623	0.139882	0.66004	2496	2248	2596	2450	2344.59	2288.84	2532.26	2593.68
WBGene00002248	92.2722	-0.221719	0.300384	-0.738116	0.460444	0.972757	115	89	89	79	108.02	90.62	86.81	83.63
WBGene00002249	908.825	0.0556571	0.121766	0.457083	0.647611	0.972757	945	879	954	871	887.68	894.97	930.58	922.08
WBGene00002250	2073.5	-0.286454	0.103247	-2.77445	0.00552943	0.0784941	2349	2309	1889	1789	2206.51	2350.95	1842.62	1893.92
WBGene00002251	1564.95	0.130257	0.106516	1.22289	0.221373	0.804698	1597	1462	1681	1541	1500.12	1488.56	1639.73	1631.37
WBGene00002252	608.445	-0.0488443	0.143791	-0.339689	0.734091	0.972757	611	652	614	564	573.94	663.84	598.93	597.08
WBGene00002253	2496.94	-0.0821453	0.106607	-0.770542	0.440978	0.972178	2909	2360	2436	2339	2732.54	2402.87	2376.19	2476.17
WBGene00002254	706.154	-0.221201	0.131317	-1.68448	0.0920889	0.533966	810	746	675	610	760.86	759.55	658.43	645.77
WBGene00002255	467.375	-0.0663835	0.153465	-0.432565	0.665331	0.972757	498	480	491	410	467.79	488.72	478.94	434.04
WBGene00002256	90.7841	0.346922	0.302688	1.14613	0.251739	0.844816	92	72	100	100	86.42	73.31	97.54	105.86
WBGene00002257	178.906	0.453734	0.239483	1.89464	0.0581405	0.407802	189	122	217	191	177.54	124.22	211.67	202.2
WBGene00002258	781.527	-0.533275	0.140597	-3.79292	0.000148884	0.0041692	992	901	723	540	931.82	917.37	705.25	571.67
WBGene00002259	88.7991	0.284113	0.309892	0.916811	0.359242	0.939925	85	79	113	80	79.84	80.44	110.23	84.69
WBGene00002260	0.986128	1.56566	3.06592	0.510666	0.609585	0.972757	0	1	3	0	0	1.02	2.93	0
WBGene00002261	2048.79	0.0820484	0.108623	0.755351	0.450038	0.972757	2110	1963	2023	2117	1982	1998.66	1973.33	2241.15
WBGene00002262	1201.56	-0.237663	0.113284	-2.09794	0.03591	0.300431	1393	1269	1126	1046	1308.5	1292.05	1098.35	1107.34
WBGene00002263	3185.89	0.347113	0.0992083	3.49883	0.000467308	0.0108038	2914	2821	3806	3232	2737.23	2872.25	3712.55	3421.54
WBGene00002264	4376.86	0.0471771	0.0911626	0.517505	0.604804	0.972757	4584	4228	4621	4146	4305.93	4304.81	4507.54	4389.15
WBGene00002265	42829.5	-0.118501	0.109082	-1.08634	0.277328	0.867876	43790	47184	38496	42122	41133.6	48041.2	37550.8	44592.3
WBGene00002266	2765.88	0.185046	0.105405	1.75557	0.0791616	0.489234	2592	2694	2917	2872	2434.77	2742.94	2845.38	3040.43
WBGene00002267	384.385	0.0134495	0.181778	0.0739883	0.94102	0.99961	415	369	455	310	389.83	375.7	443.83	328.18
WBGene00002268	2377.33	0.0212862	0.108913	0.195441	0.845048	0.980606	2547	2286	2634	2097	2392.5	2327.53	2569.33	2219.98
WBGene00002269	1698.91	0.0921534	0.12855	0.716865	0.473457	0.972757	1807	1564	2015	1455	1697.39	1592.41	1965.53	1540.33
WBGene00002270	80.7715	-0.690008	0.324416	-2.12692	0.0334265	0.286207	118	87	66	56	110.84	88.58	64.38	59.28
WBGene00002271	918.541	0.0525046	0.122897	0.427223	0.669217	0.972757	990	858	967	876	929.95	873.59	943.26	927.37
WBGene00002272	3403.78	-0.0368883	0.102228	-0.360842	0.718218	0.972757	3901	3172	3400	3216	3664.36	3229.62	3316.52	3404.61
WBGene00002273	2886.2	0.186618	0.0981019	1.90228	0.0571339	0.403198	2971	2562	3168	2886	2790.78	2608.54	3090.22	3055.25
WBGene00002274	578.352	0.360888	0.145228	2.48497	0.0129562	0.144886	575	464	677	605	540.12	472.43	660.38	640.48
WBGene00002275	256.632	0.0151862	0.196583	0.0772511	0.938424	0.99961	276	247	290	220	259.26	251.49	282.88	232.9
WBGene00002276	252.252	0.0176649	0.193599	0.0912447	0.927298	0.99961	263	250	276	225	247.05	254.54	269.22	238.2
WBGene00002280	14713.1	-0.0419358	0.0861774	-0.486622	0.626526	0.972757	15442	15075	14748	13803	14505.3	15348.9	14385.9	14612.5
WBGene00002282	32.4517	0.074022	0.49735	0.148833	0.881686	0.983744	37	28	40	26	34.76	28.51	39.02	27.52
WBGene00002295	4943.4	-0.431791	0.0992753	-4.34943	1.36493e-05	0.000555192	5938	5674	4042	4228	5577.79	5777.08	3942.76	4475.96
WBGene00002297	98.8098	0.362027	0.287599	1.25879	0.208105	0.784221	92	85	115	104	86.42	86.54	112.18	110.1
WBGene00002299	1265.95	0.090088	0.128788	0.699506	0.484236	0.972757	1199	1303	1244	1320	1126.27	1326.67	1213.46	1397.41
WBGene00002324	75.6503	-0.259298	0.355112	-0.730185	0.465277	0.972757	89	80	90	47	83.6	81.45	87.79	49.76
WBGene00002335	804.666	0.0319663	0.140699	0.227197	0.820271	0.978202	830	797	746	850	779.65	811.48	727.68	899.85
WBGene00002344	5083.48	0.142428	0.100101	1.42284	0.154782	0.694596	5121	4768	5091	5387	4810.35	4854.62	4966.01	5702.93
WBGene00002348	33482.8	-0.182672	0.211821	-0.862389	0.388473	0.95245	33929	38627	28405	33084	31870.8	39328.7	27707.6	35024.2
WBGene00002363	1654.3	0.0261419	0.111224	0.235037	0.81418	0.977815	1646	1702	1728	1561	1546.15	1732.92	1685.57	1652.55
WBGene00002368	52.2859	0.581569	0.394804	1.47306	0.140735	0.661547	48	38	71	53	45.09	38.69	69.26	56.11
WBGene00002393	12.6517	-0.210491	0.786842	-0.267513	0.789074	0.973176	18	10	10	13	16.91	10.18	9.75	13.76
WBGene00002497	110.591	0.407497	0.288745	1.41127	0.158165	0.699746	105	90	151	99	98.63	91.63	147.29	104.81
WBGene00002583	2522.15	-0.282466	0.10451	-2.70277	0.00687635	0.0926196	2968	2699	2196	2277	2787.96	2748.03	2142.08	2410.54
WBGene00002601	60.3155	-0.186914	0.368884	-0.506702	0.612364	0.972757	77	55	55	56	72.33	56	53.65	59.28
WBGene00002632	1305.72	0.115156	0.111061	1.03687	0.299798	0.887773	1323	1242	1385	1289	1242.75	1264.56	1351	1364.59
WBGene00002637	1800.04	-0.013509	0.105495	-0.128053	0.898107	0.990065	1957	1747	1888	1645	1838.29	1778.74	1841.65	1741.47
WBGene00002694	1259.61	-0.0163117	0.116555	-0.139949	0.888701	0.986362	1302	1287	1231	1232	1223.02	1310.38	1200.78	1304.25
WBGene00002696	459.425	0.173427	0.1549	1.11961	0.262882	0.854598	433	449	498	461	406.73	457.16	485.77	488.04
WBGene00002717	6709.63	-0.156867	0.0968894	-1.61903	0.10544	0.571104	7385	7082	6110	6358	6937.02	7210.65	5959.99	6730.87
WBGene00002783	4640.03	0.192428	0.090369	2.12936	0.0332245	0.284742	4577	4285	5095	4655	4299.35	4362.84	4969.91	4928
WBGene00002827	100.156	0.00922039	0.289353	0.0318655	0.974579	0.99961	116	89	103	95	108.96	90.62	100.47	100.57
WBGene00002845	5234.38	-0.122576	0.0911423	-1.34489	0.178661	0.743621	5730	5432	5012	4851	5382.41	5530.68	4888.95	5135.49
WBGene00002850	1155.4	0.00361327	0.116463	0.031025	0.97525	0.99961	1188	1171	1206	1074	1115.93	1192.27	1176.39	1136.99
WBGene00002855	929.862	-0.0409352	0.132504	-0.308937	0.75737	0.972757	1009	922	1026	786	947.79	938.75	1000.81	832.1
WBGene00002879	255.011	-0.294525	0.199241	-1.47823	0.139346	0.658861	295	280	261	192	277.1	285.09	254.59	203.26
WBGene00002881	867.46	-0.542224	0.129284	-4.19407	2.73996e-05	0.000995789	1097	1008	677	711	1030.45	1026.31	660.38	752.7
WBGene00002889	4116.49	-0.285076	0.107105	-2.66164	0.00777608	0.101259	4393	4830	3772	3535	4126.51	4917.74	3679.39	3742.31
WBGene00002891	2024.53	-0.566638	0.104492	-5.42277	5.86828e-08	4.20735e-06	2603	2346	1609	1601	2445.1	2388.62	1569.5	1694.89
WBGene00002915	9833.54	0.0918283	0.116084	0.791049	0.428915	0.967126	9711	9742	9135	10752	9121.92	9918.98	8910.72	11382.6
WBGene00002957	722.107	0.0783916	0.131101	0.597949	0.549874	0.972757	735	702	775	687	690.41	714.75	755.97	727.29
WBGene00002974	407.308	-0.217229	0.161782	-1.34273	0.179359	0.744507	446	449	402	341	418.95	457.16	392.13	361
WBGene00002975	109.447	0.0507327	0.284126	0.178557	0.858286	0.982079	129	92	107	112	121.17	93.67	104.37	118.57
WBGene00002976	194.461	0.356683	0.222596	1.60238	0.109072	0.579516	178	171	250	182	167.2	174.11	243.86	192.67
WBGene00002977	1793.16	0.0853781	0.107981	0.790676	0.429133	0.967126	1822	1737	1806	1824	1711.48	1768.55	1761.66	1930.97
WBGene00002978	12845.2	0.192952	0.104971	1.83815	0.0660403	0.438824	12194	12297	12815	14080	11454.3	12520.4	12500.4	14905.7
WBGene00002979	976.936	0.072457	0.119448	0.606597	0.544118	0.972757	1010	939	1018	954	948.73	956.06	993.01	1009.95
WBGene00002980	7472.87	-0.114025	0.0886577	-1.28613	0.198398	0.775764	8259	7639	7158	6965	7758	7777.77	6982.26	7373.47
WBGene00002981	2285.93	-0.0659383	0.100402	-0.656744	0.511345	0.972757	2427	2354	2294	2106	2279.78	2396.76	2237.68	2229.51
WBGene00002982	109.616	0.149031	0.287793	0.517839	0.60457	0.972757	129	85	115	112	121.17	86.54	112.18	118.57
WBGene00002983	163.85	-0.0034329	0.229893	-0.0149326	0.988086	0.99961	179	157	162	160	168.14	159.85	158.02	169.38
WBGene00002985	304.471	0.390817	0.177398	2.20306	0.0275907	0.250931	277	262	348	332	260.2	266.76	339.46	351.47
WBGene00002986	398.195	-0.0430931	0.168749	-0.255368	0.798439	0.973856	410	416	437	338	385.13	423.56	426.27	357.82
WBGene00002987	160.801	-0.0610914	0.238639	-0.255999	0.797952	0.973856	161	174	148	161	151.23	177.16	144.37	170.44
WBGene00002988	112.327	-0.0809421	0.279959	-0.289121	0.772488	0.972757	120	116	97	117	112.72	118.11	94.62	123.86
WBGene00002989	454.932	-0.0259016	0.159559	-0.162332	0.871044	0.983018	526	416	444	443	494.09	423.56	433.1	468.98
WBGene00002990	327.635	-0.0647773	0.184137	-0.351789	0.724996	0.972757	322	361	305	324	302.47	367.56	297.51	343
WBGene00002991	895.142	-0.00630778	0.124561	-0.0506402	0.959612	0.99961	970	867	882	875	911.16	882.75	860.35	926.32
WBGene00002992	321.26	0.0304226	0.187574	0.16219	0.871157	0.983018	362	290	296	341	340.04	295.27	288.73	361
WBGene00002994	682.077	-0.00409894	0.138963	-0.0294967	0.976468	0.99961	688	707	665	674	646.27	719.84	648.67	713.53
WBGene00002996	197.746	0.12406	0.226038	0.548847	0.58311	0.972757	200	187	180	224	187.87	190.4	175.58	237.14
WBGene00002997	153.562	-0.351804	0.267988	-1.31276	0.189264	0.761474	173	179	171	97	162.51	182.25	166.8	102.69
WBGene00002998	293.942	0.134633	0.180963	0.743982	0.456887	0.972757	303	271	329	278	284.62	275.92	320.92	294.3
WBGene00002999	1628.38	-0.117404	0.107303	-1.09413	0.273897	0.862705	1774	1692	1561	1513	1666.39	1722.74	1522.67	1601.73
WBGene00003000	196.838	-0.312942	0.212428	-1.47317	0.140705	0.661547	226	220	183	163	212.29	224	178.51	172.56
WBGene00003001	392.22	-0.554737	0.165536	-3.35117	0.000804716	0.016888	477	477	344	283	448.06	485.67	335.55	299.6
WBGene00003002	3197.27	-0.223438	0.101198	-2.20792	0.0272498	0.248813	3651	3397	2851	2947	3429.53	3458.71	2781	3119.83
WBGene00003003	4551.95	-0.0810823	0.0919148	-0.882146	0.377698	0.94635	4858	4711	4533	4181	4563.31	4796.58	4421.71	4426.2
WBGene00003006	505.493	0.0585901	0.153858	0.380806	0.703347	0.972757	543	472	570	449	510.06	480.57	556.01	475.33
WBGene00003007	497.159	0.188948	0.151431	1.24775	0.212123	0.788341	483	467	512	529	453.7	475.48	499.43	560.02
WBGene00003008	48.081	-0.227944	0.426033	-0.535039	0.592623	0.972757	51	55	57	31	47.91	56	55.6	32.82
WBGene00003009	1337.73	-0.10475	0.11726	-0.893314	0.371689	0.943722	1477	1360	1235	1298	1387.4	1384.71	1204.68	1374.12
WBGene00003010	672.741	0.318622	0.137343	2.31989	0.0203468	0.201506	619	605	728	740	581.45	615.99	710.13	783.4
WBGene00003011	478.628	-0.0163142	0.155601	-0.104847	0.916497	0.997724	552	436	492	446	518.51	443.92	479.92	472.16
WBGene00003012	810.531	-0.0890277	0.125998	-0.706582	0.479826	0.972757	887	823	815	733	833.19	837.95	794.99	775.99
WBGene00003014	2411.55	-0.119177	0.110807	-1.07554	0.282134	0.871135	2476	2649	2454	2106	2325.8	2697.12	2393.75	2229.51
WBGene00003015	69.8323	-0.415807	0.341312	-1.21826	0.223125	0.80693	79	84	64	54	74.21	85.53	62.43	57.17
WBGene00003017	23.7953	-0.420231	0.574302	-0.731725	0.464336	0.972757	33	23	19	21	31	23.42	18.53	22.23
WBGene00003018	24.9442	0.2835	0.554043	0.511692	0.608866	0.972757	23	23	29	25	21.6	23.42	28.29	26.47
WBGene00003019	262.583	0.271898	0.196335	1.38487	0.166093	0.717078	251	236	325	243	235.77	240.29	317.02	257.25
WBGene00003020	340.338	-0.144024	0.201943	-0.713193	0.475726	0.972757	343	386	390	251	322.19	393.01	380.42	265.72
WBGene00003021	826.403	0.109908	0.138686	0.792497	0.428071	0.966829	765	856	847	840	718.59	871.55	826.2	889.26
WBGene00003022	184.526	0.189159	0.219193	0.862981	0.388148	0.95245	183	170	212	176	171.9	173.09	206.79	186.32
WBGene00003024	318.906	-0.0668398	0.178582	-0.37428	0.708196	0.972757	322	344	313	300	302.47	350.25	305.32	317.59
WBGene00003025	1099.59	0.0324496	0.119048	0.272575	0.78518	0.97312	1178	1049	1189	1005	1106.54	1068.06	1159.81	1063.94
WBGene00003026	2664.23	-0.69269	0.0979742	-7.07012	1.54796e-12	2.59297e-10	3566	3176	2063	1947	3349.68	3233.7	2012.35	2061.18
WBGene00003029	122.659	0.0595587	0.26121	0.228011	0.819638	0.978202	129	117	134	113	121.17	119.13	130.71	119.63
WBGene00003030	1694.5	-0.070226	0.109181	-0.643209	0.520089	0.972757	1758	1788	1705	1552	1651.36	1820.48	1663.14	1643.02
WBGene00003031	95.1174	0.093287	0.297732	0.313325	0.754034	0.972757	106	83	108	86	99.57	84.51	105.35	91.04
WBGene00003033	152.449	-0.104178	0.249034	-0.418327	0.675708	0.972757	192	133	156	134	180.35	135.42	152.17	141.86
WBGene00003034	958.316	0.0435317	0.127975	0.340159	0.733737	0.972757	936	991	1027	891	879.22	1009	1001.79	943.25
WBGene00003035	95.9548	0.223772	0.313611	0.713534	0.475516	0.972757	94	87	83	119	88.3	88.58	80.96	125.98
WBGene00003036	475.391	0.347179	0.150093	2.3131	0.0207172	0.204137	439	417	539	509	412.37	424.58	525.77	538.85
WBGene00003037	129.732	0.0273714	0.278784	0.0981813	0.921788	0.99961	164	101	146	113	154.05	102.83	142.42	119.63
WBGene00003038	206.784	-0.0493566	0.225087	-0.219278	0.826433	0.979306	200	229	234	168	187.87	233.16	228.25	177.85
WBGene00003040	3971.92	-0.166736	0.102805	-1.62186	0.104833	0.569811	4325	4262	3589	3764	4062.64	4339.42	3500.88	3984.74
WBGene00003041	262.11	-0.073887	0.190242	-0.388385	0.697731	0.972757	296	255	274	230	278.04	259.63	267.27	243.49
WBGene00003043	725.123	-0.016853	0.137168	-0.122864	0.902215	0.991449	722	767	757	664	678.2	780.93	738.41	702.94
WBGene00003044	644.642	0.0396281	0.134984	0.293576	0.769082	0.972757	673	628	667	620	632.17	639.41	650.62	656.36
WBGene00003045	265.359	-0.0795458	0.189025	-0.420822	0.673885	0.972757	275	282	262	246	258.32	287.12	255.57	260.43
WBGene00003046	29.1403	0.0734115	0.515593	0.142383	0.886778	0.98563	28	30	33	26	26.3	30.54	32.19	27.52
WBGene00003047	1072.28	-0.0687413	0.116766	-0.588709	0.556057	0.972757	1168	1079	1089	974	1097.15	1098.6	1062.26	1031.12
WBGene00003048	1566.28	-0.175747	0.119047	-1.47629	0.139866	0.66004	1684	1710	1397	1492	1581.85	1741.06	1362.7	1579.5
WBGene00003052	3097.16	0.187903	0.0961175	1.95493	0.0505907	0.376488	3061	2864	3298	3193	2875.32	2916.03	3217.03	3380.26
WBGene00003053	3103.14	0.0682159	0.106249	0.64204	0.520847	0.972757	3204	2995	3009	3229	3009.64	3049.41	2935.12	3418.37
WBGene00003055	70.1874	-0.72303	0.353229	-2.04692	0.0406662	0.326158	92	87	65	40	86.42	88.58	63.4	42.35
WBGene00003056	224.56	0.134657	0.202023	0.666546	0.505062	0.972757	240	199	240	223	225.44	202.62	234.11	236.08
WBGene00003057	2.92227	-0.466899	1.71745	-0.271856	0.785733	0.97312	4	3	5	0	3.76	3.05	4.88	0
WBGene00003058	1.00693	1.60235	2.84834	0.562558	0.573736	0.972757	0	1	2	1	0	1.02	1.95	1.06
WBGene00003059	212.59	0.309638	0.206498	1.49947	0.133752	0.644993	209	180	233	230	196.32	183.27	227.28	243.49
WBGene00003060	1426.15	-0.440135	0.115371	-3.81496	0.000136204	0.00389703	1689	1667	1175	1204	1586.54	1697.28	1146.15	1274.61
WBGene00003061	727.639	0.0363557	0.141131	0.257603	0.796713	0.973856	817	657	706	742	767.44	668.94	688.67	785.52
WBGene00003062	470.644	0.110998	0.153578	0.722751	0.469833	0.972757	462	463	521	443	433.97	471.41	508.21	468.98
WBGene00003063	10724.1	-0.168427	0.086387	-1.94969	0.0512137	0.377875	11855	11357	10492	9411	11135.9	11563.3	10234.4	9962.92
WBGene00003064	249.973	-0.165906	0.196799	-0.843026	0.399214	0.957104	265	275	256	209	248.92	280	249.71	221.26
WBGene00003065	552.386	-0.0058116	0.151907	-0.0382576	0.969482	0.99961	582	550	512	570	546.7	559.99	499.43	603.43
WBGene00003066	110.781	-0.386561	0.273526	-1.41325	0.157581	0.698839	135	122	96	93	126.81	124.22	93.64	98.45
WBGene00003068	1536.63	-0.172489	0.107881	-1.59888	0.109848	0.581457	1710	1621	1454	1390	1606.27	1650.45	1418.3	1471.52
WBGene00003071	6947.74	-0.398141	0.102225	-3.89475	9.83008e-05	0.00294999	8080	8064	5696	6078	7589.86	8210.49	5556.15	6434.45
WBGene00003072	6662.38	-0.527441	0.107239	-4.91836	8.72718e-07	4.84358e-05	7844	8216	5174	5544	7368.17	8365.25	5046.97	5869.13
WBGene00003073	9547.04	-0.161377	0.0917109	-1.75963	0.0784712	0.486764	10594	10028	9683	8106	9951.35	10210.2	9445.26	8581.39
WBGene00003074	144.322	0.00456591	0.242269	0.0188464	0.984964	0.99961	154	141	152	133	144.66	143.56	148.27	140.8
WBGene00003075	37.41	0.495901	0.472748	1.04897	0.29419	0.882928	25	38	43	43	23.48	38.69	41.94	45.52
WBGene00003076	131.609	0.360363	0.25382	1.41976	0.155678	0.697678	125	111	145	146	117.42	113.02	141.44	154.56
WBGene00003077	57.2565	0.579995	0.373061	1.55469	0.120019	0.611983	50	44	68	67	46.97	44.8	66.33	70.93
WBGene00003078	92.6928	0.53253	0.29716	1.79206	0.0731232	0.468324	79	76	114	102	74.21	77.38	111.2	107.98
WBGene00003079	134.892	0.00696058	0.260747	0.0266948	0.978703	0.99961	123	151	136	130	115.54	153.74	132.66	137.62
WBGene00003080	115.817	0.570639	0.285482	1.99886	0.0456233	0.35218	105	86	118	153	98.63	87.56	115.1	161.97
WBGene00003081	84.0574	-0.0952566	0.315223	-0.302188	0.762509	0.972757	82	95	83	77	77.03	96.73	80.96	81.52
WBGene00003082	113.367	0.322586	0.287315	1.12276	0.26154	0.853396	91	114	115	132	85.48	116.07	112.18	139.74
WBGene00003083	192.974	0.351231	0.223637	1.57054	0.116289	0.600043	176	171	248	180	165.32	174.11	241.91	190.56
WBGene00003084	784.503	-0.152721	0.131742	-1.15924	0.246358	0.837311	829	858	771	693	778.71	873.59	752.07	733.64
WBGene00003085	911.255	0.0133791	0.128063	0.104473	0.916794	0.997724	936	918	882	917	879.22	934.68	860.35	970.78
WBGene00003086	894.744	0.0665696	0.125979	0.528419	0.597209	0.972757	905	882	898	902	850.1	898.02	875.95	954.9
WBGene00003087	522.969	-0.109194	0.148699	-0.734328	0.462749	0.972757	583	528	485	504	547.63	537.59	473.09	533.56
WBGene00003089	827.056	0.162069	0.128214	1.26405	0.206211	0.783289	864	736	872	847	811.59	749.37	850.59	896.67
WBGene00003090	2747.33	0.173103	0.122362	1.41468	0.157162	0.698839	3092	2220	3030	2710	2904.44	2260.33	2955.61	2868.93
WBGene00003091	838.665	0.0295318	0.141248	0.209078	0.834388	0.979575	978	728	905	767	918.67	741.23	882.78	811.98
WBGene00003092	267.604	0.0906998	0.219184	0.413807	0.679015	0.972757	292	240	341	207	274.29	244.36	332.63	219.14
WBGene00003093	370.01	0.480299	0.16502	2.91054	0.00360804	0.0570659	338	295	440	409	317.5	300.36	429.2	432.99
WBGene00003094	5.23006	1.36212	1.238	1.10026	0.271218	0.860298	3	3	10	5	2.82	3.05	9.75	5.29
WBGene00003095	11.2681	0.769985	0.824796	0.933546	0.350538	0.935224	8	9	15	13	7.51	9.16	14.63	13.76
WBGene00003096	2336.87	-0.861839	0.120675	-7.14179	9.21213e-13	1.58638e-10	3559	2638	1659	1606	3343.11	2685.92	1618.27	1700.19
WBGene00003097	2080.51	-0.36396	0.105559	-3.44792	0.000564923	0.0126788	2491	2301	1772	1805	2339.89	2342.8	1728.49	1910.86
WBGene00003098	0.978193	0.0981882	2.79205	0.035167	0.971947	0.99961	2	0	1	1	1.88	0	0.98	1.06
WBGene00003099	2.9937	0.0553509	1.5532	0.0356366	0.971572	0.99961	3	3	3	3	2.82	3.05	2.93	3.18
WBGene00003100	3.91059	0.0550129	1.41393	0.0389078	0.968964	0.99961	6	2	6	2	5.64	2.04	5.85	2.12
WBGene00003102	132.37	-0.0704277	0.254336	-0.276908	0.781851	0.972757	152	126	126	128	142.78	128.29	122.91	135.51
WBGene00003104	45.3219	-0.610716	0.434893	-1.40429	0.160232	0.70432	70	43	41	30	65.75	43.78	39.99	31.76
WBGene00003106	80.4714	-0.287743	0.325707	-0.88344	0.376998	0.945536	95	86	63	79	89.24	87.56	61.45	83.63
WBGene00003107	4.20507	0.578255	1.34367	0.430355	0.666938	0.972757	5	2	6	4	4.7	2.04	5.85	4.23
WBGene00003111	498.175	-0.202172	0.150983	-1.33904	0.180558	0.746552	594	499	492	422	557.97	508.06	479.92	446.75
WBGene00003112	143.483	0.18012	0.25013	0.720106	0.47146	0.972757	140	135	139	160	131.51	137.45	135.59	169.38
WBGene00003114	18.2128	0.832397	0.660447	1.26035	0.207541	0.783789	17	10	24	22	15.97	10.18	23.41	23.29
WBGene00003119	263.997	-0.0188324	0.194132	-0.0970081	0.92272	0.99961	268	275	290	228	251.74	280	282.88	241.37
WBGene00003123	409.255	0.339383	0.162067	2.09409	0.0362517	0.302411	361	377	478	423	339.1	383.85	466.26	447.81
WBGene00003124	301.574	-0.658236	0.180689	-3.64292	0.000269561	0.00683209	386	369	228	232	362.58	375.7	222.4	245.61
WBGene00003129	257.435	-0.0496405	0.189328	-0.262193	0.793173	0.973176	280	256	254	244	263.01	260.65	247.76	258.31
WBGene00003130	651.497	-0.193413	0.135574	-1.42662	0.153688	0.693063	759	665	616	581	712.96	677.08	600.88	615.07
WBGene00003132	1114.67	0.0955474	0.116806	0.818004	0.413355	0.961718	1146	1060	1217	1054	1076.48	1079.26	1187.12	1115.81
WBGene00003133	520.119	0.0447168	0.145004	0.308383	0.757791	0.972757	545	503	536	504	511.94	512.14	522.84	533.56
WBGene00003134	168.755	0.322296	0.227524	1.41654	0.156618	0.698588	159	148	201	169	149.35	150.69	196.07	178.91
WBGene00003136	218.454	-0.0710202	0.21755	-0.326455	0.74408	0.972757	247	212	250	172	232.02	215.85	243.86	182.09
WBGene00003142	182.709	-0.0715105	0.223307	-0.320234	0.748791	0.972757	194	189	198	154	182.23	192.43	193.14	163.03
WBGene00003143	790.395	-0.000456655	0.128017	-0.00356713	0.997154	0.99961	826	791	830	728	775.89	805.37	809.62	770.69
WBGene00003144	1141.92	0.0516116	0.116838	0.441738	0.658679	0.972757	1163	1130	1159	1128	1092.45	1150.53	1130.54	1194.15
WBGene00003148	380.363	-0.275107	0.165488	-1.66239	0.096434	0.547759	424	427	340	337	398.28	434.76	331.65	356.76
WBGene00003149	2224.58	0.0531571	0.116871	0.454836	0.649228	0.972757	2316	2152	2091	2354	2175.51	2191.09	2039.66	2492.05
WBGene00003150	2345.65	-0.124515	0.105765	-1.17728	0.239084	0.828974	2475	2523	2224	2191	2324.86	2568.83	2169.4	2319.49
WBGene00003151	8529.94	-0.458463	0.0874483	-5.24268	1.58263e-07	1.04898e-05	10437	9767	7529	6638	9803.88	9944.43	7344.15	7027.29
WBGene00003153	8384.49	-0.236247	0.0860698	-2.74483	0.00605415	0.0843188	9684	8881	7902	7265	9096.56	9042.33	7707.99	7691.06
WBGene00003154	167.661	0.555708	0.246565	2.2538	0.0242087	0.228285	129	148	233	162	121.17	150.69	227.28	171.5
WBGene00003155	293.353	0.747828	0.202512	3.69276	0.000221837	0.00581446	212	235	429	299	199.14	239.27	418.47	316.54
WBGene00003156	276.54	0.648475	0.210341	3.08296	0.00204951	0.036496	257	186	395	274	241.41	189.38	385.3	290.07
WBGene00003157	221.944	0.691735	0.228517	3.02706	0.00246946	0.0424462	186	162	334	210	174.72	164.94	325.8	222.32
WBGene00003158	306.53	0.265543	0.177263	1.49802	0.134128	0.645717	298	272	354	306	279.92	276.94	345.31	323.95
WBGene00003159	332.107	0.882578	0.179654	4.91267	8.98451e-07	4.95655e-05	245	233	479	372	230.14	237.23	467.24	393.82
WBGene00003160	376.542	0.122678	0.165184	0.742677	0.457677	0.972757	369	368	415	359	346.62	374.69	404.81	380.05
[truncated: 18,448 more rows]
